# Supplementary material for: Citizen-science map of the vaginal microbiome
Source: Research Square preprint supplement (doi:10.21203/rs.3.rs-1350465/v1), 2022-02-14
Supplement: Supplementary file 1 [file 34ba7b9f6a71c5768609fb97.xlsx]

## Sheet: Description
	Sheet	Description
	Adonis	The results of the adonis tests
	Shannon	The results of the linear regressions on the shannon diversity
	RA	The results of the linear regression on the CLR transformed relative abundance of specific taxa, and egeintaxa
	Column	Description
	effect	The name of the tested effect
	taxa	The name of the tested taxa
	SumOfSqs	Sum of squares in the adonis test
	R2	R2 value from the adonis test
	F	Calculated F-statistic
	Estimate	The effect size in the linear regression
	Std. Error	The standard error of the effect size
	t value	Calculated t-statistic in the linear regression
	Pr(>|t|)	computed p-value in linear regression
	Pr(>F)	computed p-value in adonis test
	qvalue	Multiple testing adjusted p-value
	n	The number of samples considered, per group
	formula	The formula used in the test

## Sheet: Adonis
effect	SumOfSqs	R2	F	Pr(>F)	qvalue	n	formula
Contraceptive: Progestogen pill	0.550919	0.000576178	1.81821	0.112	0.257148	{False: 2965, True: 78}	~lib_size+read_conc_norm+run20201009_isala_cross_1+run20201016_isala_cross_2+run20201023_isala_cross_3+run20201030_isala_cross_4+run20201106_isala_cross_5+run20201120_isala_cross_6+run20201204_isala_cross_8+run20201211_isala_cross_9+run20210119_isala_cross_7+Q0.Leeftijd+Q2.Q25.Pill_progestogen
Contraceptive: Copper spiral	0.280314	0.000293167	0.924857	0.407	0.595145	{False: 2930, True: 113}	~lib_size+read_conc_norm+run20201009_isala_cross_1+run20201016_isala_cross_2+run20201023_isala_cross_3+run20201030_isala_cross_4+run20201106_isala_cross_5+run20201120_isala_cross_6+run20201204_isala_cross_8+run20201211_isala_cross_9+run20210119_isala_cross_7+Q0.Leeftijd+Q2.Q25.Spiral_copper
Contraceptive: Hormonal spiral	0.476037	0.000497863	1.57095	0.166	0.348328	{True: 605, False: 2438}	~lib_size+read_conc_norm+run20201009_isala_cross_1+run20201016_isala_cross_2+run20201023_isala_cross_3+run20201030_isala_cross_4+run20201106_isala_cross_5+run20201120_isala_cross_6+run20201204_isala_cross_8+run20201211_isala_cross_9+run20210119_isala_cross_7+Q0.Leeftijd+Q2.Q25.Spiral_hormone
Contraceptive: Injection	0.134561	0.000140731	0.443894	0.796	0.868981	{False: 3034, True: 9}	~lib_size+read_conc_norm+run20201009_isala_cross_1+run20201016_isala_cross_2+run20201023_isala_cross_3+run20201030_isala_cross_4+run20201106_isala_cross_5+run20201120_isala_cross_6+run20201204_isala_cross_8+run20201211_isala_cross_9+run20210119_isala_cross_7+Q0.Leeftijd+Q2.Q25.Prikpil
Contraceptive: Ring	0.270222	0.000282611	0.891547	0.462	0.637968	{False: 2906, True: 137}	~lib_size+read_conc_norm+run20201009_isala_cross_1+run20201016_isala_cross_2+run20201023_isala_cross_3+run20201030_isala_cross_4+run20201106_isala_cross_5+run20201120_isala_cross_6+run20201204_isala_cross_8+run20201211_isala_cross_9+run20210119_isala_cross_7+Q0.Leeftijd+Q2.Q25.Ring
Contraceptive: Implant	0.261374	0.000273358	0.862348	0.467	0.637968	{False: 3020, True: 23}	~lib_size+read_conc_norm+run20201009_isala_cross_1+run20201016_isala_cross_2+run20201023_isala_cross_3+run20201030_isala_cross_4+run20201106_isala_cross_5+run20201120_isala_cross_6+run20201204_isala_cross_8+run20201211_isala_cross_9+run20210119_isala_cross_7+Q0.Leeftijd+Q2.Q25.Implant
Contraceptive: Plaster	0.256264	0.000268013	0.845483	0.484	0.648712	{False: 3035, True: 8}	~lib_size+read_conc_norm+run20201009_isala_cross_1+run20201016_isala_cross_2+run20201023_isala_cross_3+run20201030_isala_cross_4+run20201106_isala_cross_5+run20201120_isala_cross_6+run20201204_isala_cross_8+run20201211_isala_cross_9+run20210119_isala_cross_7+Q0.Leeftijd+Q2.Q25.Plaster
Contraceptive: Condom	0.0971732	0.000101628	0.320545	0.892	0.906159	{False: 2643, True: 400}	~lib_size+read_conc_norm+run20201009_isala_cross_1+run20201016_isala_cross_2+run20201023_isala_cross_3+run20201030_isala_cross_4+run20201106_isala_cross_5+run20201120_isala_cross_6+run20201204_isala_cross_8+run20201211_isala_cross_9+run20210119_isala_cross_7+Q0.Leeftijd+Q2.Q25.Condom
Contraceptive: Cup	0.208754	0.000218325	0.6887	0.628	0.755981	{False: 3041, True: 2}	~lib_size+read_conc_norm+run20201009_isala_cross_1+run20201016_isala_cross_2+run20201023_isala_cross_3+run20201030_isala_cross_4+run20201106_isala_cross_5+run20201120_isala_cross_6+run20201204_isala_cross_8+run20201211_isala_cross_9+run20210119_isala_cross_7+Q0.Leeftijd+Q2.Q25.Cup
Contraceptive: Morning after pill	0.198904	0.000208023	0.656195	0.626	0.755981	{False: 3034, True: 9}	~lib_size+read_conc_norm+run20201009_isala_cross_1+run20201016_isala_cross_2+run20201023_isala_cross_3+run20201030_isala_cross_4+run20201106_isala_cross_5+run20201120_isala_cross_6+run20201204_isala_cross_8+run20201211_isala_cross_9+run20210119_isala_cross_7+Q0.Leeftijd+Q2.Q25.Morning_after
Contraceptive: Periodic celibacy	0.421102	0.000440409	1.38958	0.216	0.405099	{False: 2987, True: 56}	~lib_size+read_conc_norm+run20201009_isala_cross_1+run20201016_isala_cross_2+run20201023_isala_cross_3+run20201030_isala_cross_4+run20201106_isala_cross_5+run20201120_isala_cross_6+run20201204_isala_cross_8+run20201211_isala_cross_9+run20210119_isala_cross_7+Q0.Leeftijd+Q2.Q25.Periodic_celibacy
Contraceptive: Pullout method	0.457252	0.000478217	1.50893	0.191	0.374682	{False: 2904, True: 139}	~lib_size+read_conc_norm+run20201009_isala_cross_1+run20201016_isala_cross_2+run20201023_isala_cross_3+run20201030_isala_cross_4+run20201106_isala_cross_5+run20201120_isala_cross_6+run20201204_isala_cross_8+run20201211_isala_cross_9+run20210119_isala_cross_7+Q0.Leeftijd+Q2.Q25.Pullout
Contraceptive: Sterlized	0.204033	0.000213388	0.673121	0.599	0.735463	{False: 3012, True: 31}	~lib_size+read_conc_norm+run20201009_isala_cross_1+run20201016_isala_cross_2+run20201023_isala_cross_3+run20201030_isala_cross_4+run20201106_isala_cross_5+run20201120_isala_cross_6+run20201204_isala_cross_8+run20201211_isala_cross_9+run20210119_isala_cross_7+Q0.Leeftijd+Q2.Q25.Sterilized
Contraceptive: Partner sterlized	0.855293	0.000894507	2.82368	0.022	0.0915772	{False: 2996, True: 47}	~lib_size+read_conc_norm+run20201009_isala_cross_1+run20201016_isala_cross_2+run20201023_isala_cross_3+run20201030_isala_cross_4+run20201106_isala_cross_5+run20201120_isala_cross_6+run20201204_isala_cross_8+run20201211_isala_cross_9+run20210119_isala_cross_7+Q0.Leeftijd+Q2.Q25.Partner_sterilized
Born with vaginal birth	0.131682	0.00013772	0.434396	0.786	0.863588	{True: 2714, False: 329}	~lib_size+read_conc_norm+run20201009_isala_cross_1+run20201016_isala_cross_2+run20201023_isala_cross_3+run20201030_isala_cross_4+run20201106_isala_cross_5+run20201120_isala_cross_6+run20201204_isala_cross_8+run20201211_isala_cross_9+run20210119_isala_cross_7+Q0.Leeftijd+Q1.Q32.Born_vaginal
Born with caesarean section	0.110448	0.000115512	0.364341	0.862	0.897041	{False: 2749, True: 294}	~lib_size+read_conc_norm+run20201009_isala_cross_1+run20201016_isala_cross_2+run20201023_isala_cross_3+run20201030_isala_cross_4+run20201106_isala_cross_5+run20201120_isala_cross_6+run20201204_isala_cross_8+run20201211_isala_cross_9+run20210119_isala_cross_7+Q0.Leeftijd+Q1.Q32.Born_csect
Frequency of probiotic dairy	0.13595	0.000142183	0.448476	0.762	0.846299	3043	~lib_size+read_conc_norm+run20201009_isala_cross_1+run20201016_isala_cross_2+run20201023_isala_cross_3+run20201030_isala_cross_4+run20201106_isala_cross_5+run20201120_isala_cross_6+run20201204_isala_cross_8+run20201211_isala_cross_9+run20210119_isala_cross_7+Q0.Leeftijd+Q1.Q28_1.Freq_Dairy_Probio
Frequency of probiotic yoghurt	0.646932	0.000676593	2.13531	0.073	0.196716	3043	~lib_size+read_conc_norm+run20201009_isala_cross_1+run20201016_isala_cross_2+run20201023_isala_cross_3+run20201030_isala_cross_4+run20201106_isala_cross_5+run20201120_isala_cross_6+run20201204_isala_cross_8+run20201211_isala_cross_9+run20210119_isala_cross_7+Q0.Leeftijd+Q1.Q28_2.Freq_Yoghurt_Probio
Frequency of probiotic capsules	0.153412	0.000160445	0.506089	0.735	0.825263	3043	~lib_size+read_conc_norm+run20201009_isala_cross_1+run20201016_isala_cross_2+run20201023_isala_cross_3+run20201030_isala_cross_4+run20201106_isala_cross_5+run20201120_isala_cross_6+run20201204_isala_cross_8+run20201211_isala_cross_9+run20210119_isala_cross_7+Q0.Leeftijd+Q1.Q28_3.Freq_Capsules_Probio
Frequency dairy	0.254973	0.000266663	0.841223	0.486	0.649692	3043	~lib_size+read_conc_norm+run20201009_isala_cross_1+run20201016_isala_cross_2+run20201023_isala_cross_3+run20201030_isala_cross_4+run20201106_isala_cross_5+run20201120_isala_cross_6+run20201204_isala_cross_8+run20201211_isala_cross_9+run20210119_isala_cross_7+Q0.Leeftijd+Q1.Q29_1.Freq_Dairy
Frequency of fermented food	0.189468	0.000198155	0.625061	0.629	0.755981	3043	~lib_size+read_conc_norm+run20201009_isala_cross_1+run20201016_isala_cross_2+run20201023_isala_cross_3+run20201030_isala_cross_4+run20201106_isala_cross_5+run20201120_isala_cross_6+run20201204_isala_cross_8+run20201211_isala_cross_9+run20210119_isala_cross_7+Q0.Leeftijd+Q1.Q29_2.Freq_FermFood
Frequency of animal products	0.21453	0.000224366	0.70776	0.574	0.7168	3043	~lib_size+read_conc_norm+run20201009_isala_cross_1+run20201016_isala_cross_2+run20201023_isala_cross_3+run20201030_isala_cross_4+run20201106_isala_cross_5+run20201120_isala_cross_6+run20201204_isala_cross_8+run20201211_isala_cross_9+run20210119_isala_cross_7+Q0.Leeftijd+Q1.Q29_5.Freq_Animal_Prod
Frequency of light beverages	0.956508	0.00100036	3.15818	0.029	0.104563	3043	~lib_size+read_conc_norm+run20201009_isala_cross_1+run20201016_isala_cross_2+run20201023_isala_cross_3+run20201030_isala_cross_4+run20201106_isala_cross_5+run20201120_isala_cross_6+run20201204_isala_cross_8+run20201211_isala_cross_9+run20210119_isala_cross_7+Q0.Leeftijd+Q1.Q29_8.Freq_Light_Beverages
Frequency of fruit	0.236832	0.00024769	0.781355	0.51	0.66573	3043	~lib_size+read_conc_norm+run20201009_isala_cross_1+run20201016_isala_cross_2+run20201023_isala_cross_3+run20201030_isala_cross_4+run20201106_isala_cross_5+run20201120_isala_cross_6+run20201204_isala_cross_8+run20201211_isala_cross_9+run20210119_isala_cross_7+Q0.Leeftijd+Q1.Q29_9.Freq_Fruit
Frequency vegetables	0.430644	0.000450389	1.42108	0.209	0.398222	3043	~lib_size+read_conc_norm+run20201009_isala_cross_1+run20201016_isala_cross_2+run20201023_isala_cross_3+run20201030_isala_cross_4+run20201106_isala_cross_5+run20201120_isala_cross_6+run20201204_isala_cross_8+run20201211_isala_cross_9+run20210119_isala_cross_7+Q0.Leeftijd+Q1.Q29_10.Freq_Vegetables
Intake of probiotic dairy (last 24 hours)	0.12667	0.000132718	0.417986	0.815	0.88064	{False: 2970, True: 68, nan: 5}	~lib_size+read_conc_norm+run20201009_isala_cross_1+run20201016_isala_cross_2+run20201023_isala_cross_3+run20201030_isala_cross_4+run20201106_isala_cross_5+run20201120_isala_cross_6+run20201204_isala_cross_8+run20201211_isala_cross_9+run20210119_isala_cross_7+Q0.Leeftijd+Q2.Q8_1.Intake_Probio_Dairy_24h
Intake of probiotic yoghurt (last 24 hours)	0.263117	0.00027568	0.868363	0.461	0.637968	{False: 2677, True: 361, nan: 5}	~lib_size+read_conc_norm+run20201009_isala_cross_1+run20201016_isala_cross_2+run20201023_isala_cross_3+run20201030_isala_cross_4+run20201106_isala_cross_5+run20201120_isala_cross_6+run20201204_isala_cross_8+run20201211_isala_cross_9+run20210119_isala_cross_7+Q0.Leeftijd+Q2.Q8_4.Intake_Probio_Yoghurt_24h
Intake of probiotic capsules (last 24 hours)	0.358432	0.000375546	1.18305	0.289	0.493227	{False: 2940, True: 98, nan: 5}	~lib_size+read_conc_norm+run20201009_isala_cross_1+run20201016_isala_cross_2+run20201023_isala_cross_3+run20201030_isala_cross_4+run20201106_isala_cross_5+run20201120_isala_cross_6+run20201204_isala_cross_8+run20201211_isala_cross_9+run20210119_isala_cross_7+Q0.Leeftijd+Q2.Q8_5.Intake_Probio_Capsules_24h
No intake of probiotics (last 24 hours)	0.393047	0.000411729	1.29749	0.212	0.400531	{True: 2548, False: 491, nan: 4}	~lib_size+read_conc_norm+run20201009_isala_cross_1+run20201016_isala_cross_2+run20201023_isala_cross_3+run20201030_isala_cross_4+run20201106_isala_cross_5+run20201120_isala_cross_6+run20201204_isala_cross_8+run20201211_isala_cross_9+run20210119_isala_cross_7+Q0.Leeftijd+Q2.Q8_6.No_Intake_Probio
Portions of dairy (last 24 hours)	0.288752	0.000302539	0.952991	0.41	0.596125	3038	~lib_size+read_conc_norm+run20201009_isala_cross_1+run20201016_isala_cross_2+run20201023_isala_cross_3+run20201030_isala_cross_4+run20201106_isala_cross_5+run20201120_isala_cross_6+run20201204_isala_cross_8+run20201211_isala_cross_9+run20210119_isala_cross_7+Q0.Leeftijd+Q2.Q10_1.Portion_24h_Dairy
Portions of fermented foods (last 24 hours)	0.110057	0.000115312	0.363159	0.843	0.88993	3038	~lib_size+read_conc_norm+run20201009_isala_cross_1+run20201016_isala_cross_2+run20201023_isala_cross_3+run20201030_isala_cross_4+run20201106_isala_cross_5+run20201120_isala_cross_6+run20201204_isala_cross_8+run20201211_isala_cross_9+run20210119_isala_cross_7+Q0.Leeftijd+Q2.Q10_2.Portion_24h_Fermented_Food
Portions of alcohol (last 24 hours)	0.550028	0.00057629	1.81582	0.12	0.271858	3038	~lib_size+read_conc_norm+run20201009_isala_cross_1+run20201016_isala_cross_2+run20201023_isala_cross_3+run20201030_isala_cross_4+run20201106_isala_cross_5+run20201120_isala_cross_6+run20201204_isala_cross_8+run20201211_isala_cross_9+run20210119_isala_cross_7+Q0.Leeftijd+Q2.Q10_3.Portion_24h_Alcohol
Portions of meat (last 24 hours)	0.769863	0.000806621	2.54217	0.04	0.130446	3038	~lib_size+read_conc_norm+run20201009_isala_cross_1+run20201016_isala_cross_2+run20201023_isala_cross_3+run20201030_isala_cross_4+run20201106_isala_cross_5+run20201120_isala_cross_6+run20201204_isala_cross_8+run20201211_isala_cross_9+run20210119_isala_cross_7+Q0.Leeftijd+Q2.Q10_4.Portion_24h_Meat
Portions of fish (last 24 hours)	0.361411	0.000378667	1.19289	0.267	0.468164	3038	~lib_size+read_conc_norm+run20201009_isala_cross_1+run20201016_isala_cross_2+run20201023_isala_cross_3+run20201030_isala_cross_4+run20201106_isala_cross_5+run20201120_isala_cross_6+run20201204_isala_cross_8+run20201211_isala_cross_9+run20210119_isala_cross_7+Q0.Leeftijd+Q2.Q10_5.Portion_24h_Fish
Portions of coffee (last 24 hours)	0.472698	0.000495268	1.5604	0.179	0.359404	3038	~lib_size+read_conc_norm+run20201009_isala_cross_1+run20201016_isala_cross_2+run20201023_isala_cross_3+run20201030_isala_cross_4+run20201106_isala_cross_5+run20201120_isala_cross_6+run20201204_isala_cross_8+run20201211_isala_cross_9+run20210119_isala_cross_7+Q0.Leeftijd+Q2.Q10_6.Portion_24h_Coffee
Portions of sugary beverages (last 24 hours)	0.590054	0.000618226	1.94804	0.102	0.242902	3038	~lib_size+read_conc_norm+run20201009_isala_cross_1+run20201016_isala_cross_2+run20201023_isala_cross_3+run20201030_isala_cross_4+run20201106_isala_cross_5+run20201120_isala_cross_6+run20201204_isala_cross_8+run20201211_isala_cross_9+run20210119_isala_cross_7+Q0.Leeftijd+Q2.Q10_7.Portion_24h_Sugar_Beverages
Portions of light beverages (last 24 hours)	0.664108	0.000695816	2.1927	0.077	0.202174	3038	~lib_size+read_conc_norm+run20201009_isala_cross_1+run20201016_isala_cross_2+run20201023_isala_cross_3+run20201030_isala_cross_4+run20201106_isala_cross_5+run20201120_isala_cross_6+run20201204_isala_cross_8+run20201211_isala_cross_9+run20210119_isala_cross_7+Q0.Leeftijd+Q2.Q10_8.Portion_24h_Light_Beverages
Portions of fruit fibers (last 24 hours)	0.435971	0.000456787	1.4391	0.21	0.398222	3038	~lib_size+read_conc_norm+run20201009_isala_cross_1+run20201016_isala_cross_2+run20201023_isala_cross_3+run20201030_isala_cross_4+run20201106_isala_cross_5+run20201120_isala_cross_6+run20201204_isala_cross_8+run20201211_isala_cross_9+run20210119_isala_cross_7+Q0.Leeftijd+Q2.Q10_9.Portion_24h_Fruit_Fibers
Portions of vegetable fibers (last 24 hours)	0.924288	0.000968419	3.05262	0.023	0.0934603	3038	~lib_size+read_conc_norm+run20201009_isala_cross_1+run20201016_isala_cross_2+run20201023_isala_cross_3+run20201030_isala_cross_4+run20201106_isala_cross_5+run20201120_isala_cross_6+run20201204_isala_cross_8+run20201211_isala_cross_9+run20210119_isala_cross_7+Q0.Leeftijd+Q2.Q10_10.Portion_24h_Vegetable_Fibers
Portions of cold pasta (last 24 hours)	0.413623	0.000433877	1.36492	0.23	0.425126	3034	~lib_size+read_conc_norm+run20201009_isala_cross_1+run20201016_isala_cross_2+run20201023_isala_cross_3+run20201030_isala_cross_4+run20201106_isala_cross_5+run20201120_isala_cross_6+run20201204_isala_cross_8+run20201211_isala_cross_9+run20210119_isala_cross_7+Q0.Leeftijd+Q2.Q11_1.Portion_24h_Cold_Pasta
Portions of whole grain bread (last 24 hours)	0.255975	0.00026851	0.844548	0.465	0.637968	3034	~lib_size+read_conc_norm+run20201009_isala_cross_1+run20201016_isala_cross_2+run20201023_isala_cross_3+run20201030_isala_cross_4+run20201106_isala_cross_5+run20201120_isala_cross_6+run20201204_isala_cross_8+run20201211_isala_cross_9+run20210119_isala_cross_7+Q0.Leeftijd+Q2.Q11_2.Portion_24h_Whole_Grain_Bread
Portions of sourdough (last 24 hours)	0.33269	0.000348981	1.09775	0.315	0.513631	3034	~lib_size+read_conc_norm+run20201009_isala_cross_1+run20201016_isala_cross_2+run20201023_isala_cross_3+run20201030_isala_cross_4+run20201106_isala_cross_5+run20201120_isala_cross_6+run20201204_isala_cross_8+run20201211_isala_cross_9+run20210119_isala_cross_7+Q0.Leeftijd+Q2.Q11_3.Portion_24h_Sourdough
Portions of quinoa (last 24 hours)	0.150202	0.000157557	0.49551	0.753	0.838122	3034	~lib_size+read_conc_norm+run20201009_isala_cross_1+run20201016_isala_cross_2+run20201023_isala_cross_3+run20201030_isala_cross_4+run20201106_isala_cross_5+run20201120_isala_cross_6+run20201204_isala_cross_8+run20201211_isala_cross_9+run20210119_isala_cross_7+Q0.Leeftijd+Q2.Q11_4.Portion_24h_Quinoa
Portions of nuts (last 24 hours)	0.314441	0.000329838	1.03751	0.374	0.569905	3034	~lib_size+read_conc_norm+run20201009_isala_cross_1+run20201016_isala_cross_2+run20201023_isala_cross_3+run20201030_isala_cross_4+run20201106_isala_cross_5+run20201120_isala_cross_6+run20201204_isala_cross_8+run20201211_isala_cross_9+run20210119_isala_cross_7+Q0.Leeftijd+Q2.Q11_6.Portion_24h_Nuts
Portions of chocolate (last 24 hours)	0.13257	0.000139062	0.437334	0.78	0.858839	3034	~lib_size+read_conc_norm+run20201009_isala_cross_1+run20201016_isala_cross_2+run20201023_isala_cross_3+run20201030_isala_cross_4+run20201106_isala_cross_5+run20201120_isala_cross_6+run20201204_isala_cross_8+run20201211_isala_cross_9+run20210119_isala_cross_7+Q0.Leeftijd+Q2.Q11_7.Portion_24h_Chocolat
Portions of candy (last 24 hours)	0.337454	0.000353978	1.11347	0.315	0.513631	3034	~lib_size+read_conc_norm+run20201009_isala_cross_1+run20201016_isala_cross_2+run20201023_isala_cross_3+run20201030_isala_cross_4+run20201106_isala_cross_5+run20201120_isala_cross_6+run20201204_isala_cross_8+run20201211_isala_cross_9+run20210119_isala_cross_7+Q0.Leeftijd+Q2.Q11_8.Portion_24h_Candy
Portions of savoury snacks (last 24 hours)	0.291271	0.000305534	0.961039	0.381	0.575434	3034	~lib_size+read_conc_norm+run20201009_isala_cross_1+run20201016_isala_cross_2+run20201023_isala_cross_3+run20201030_isala_cross_4+run20201106_isala_cross_5+run20201120_isala_cross_6+run20201204_isala_cross_8+run20201211_isala_cross_9+run20210119_isala_cross_7+Q0.Leeftijd+Q2.Q11_9.Portion_24h_Salty_Snacks
Intake of probiotics	1.12178	0.00117762	3.70524	0.01	0.0483019	{True: 1682, False: 1350, nan: 11}	~lib_size+read_conc_norm+run20201009_isala_cross_1+run20201016_isala_cross_2+run20201023_isala_cross_3+run20201030_isala_cross_4+run20201106_isala_cross_5+run20201120_isala_cross_6+run20201204_isala_cross_8+run20201211_isala_cross_9+run20210119_isala_cross_7+Q0.Leeftijd+Q2.Q13.Intake_probiotics
Monthly probiotic dairy	0.209004	0.000218587	0.689525	0.605	0.741053	3043	~lib_size+read_conc_norm+run20201009_isala_cross_1+run20201016_isala_cross_2+run20201023_isala_cross_3+run20201030_isala_cross_4+run20201106_isala_cross_5+run20201120_isala_cross_6+run20201204_isala_cross_8+run20201211_isala_cross_9+run20210119_isala_cross_7+Q0.Leeftijd+Q1.Q28_1.Monthly_Dairy_Probio
Monthly probiotic yoghurt	0.630772	0.000659693	2.08194	0.076	0.202174	3043	~lib_size+read_conc_norm+run20201009_isala_cross_1+run20201016_isala_cross_2+run20201023_isala_cross_3+run20201030_isala_cross_4+run20201106_isala_cross_5+run20201120_isala_cross_6+run20201204_isala_cross_8+run20201211_isala_cross_9+run20210119_isala_cross_7+Q0.Leeftijd+Q1.Q28_2.Monthly_Yoghurt_Probio
Monthly probiotic capsules	0.102872	0.000107589	0.339346	0.886	0.903889	3043	~lib_size+read_conc_norm+run20201009_isala_cross_1+run20201016_isala_cross_2+run20201023_isala_cross_3+run20201030_isala_cross_4+run20201106_isala_cross_5+run20201120_isala_cross_6+run20201204_isala_cross_8+run20201211_isala_cross_9+run20210119_isala_cross_7+Q0.Leeftijd+Q1.Q28_3.Monthly_Capsules_Probio
Monthly dairy	0.0842377	8.81e-05	0.277871	0.928	0.930818	3043	~lib_size+read_conc_norm+run20201009_isala_cross_1+run20201016_isala_cross_2+run20201023_isala_cross_3+run20201030_isala_cross_4+run20201106_isala_cross_5+run20201120_isala_cross_6+run20201204_isala_cross_8+run20201211_isala_cross_9+run20210119_isala_cross_7+Q0.Leeftijd+Q1.Q29_1.Monthly_Dairy
Monthly fermented food	0.153951	0.00016101	0.507869	0.715	0.818062	3043	~lib_size+read_conc_norm+run20201009_isala_cross_1+run20201016_isala_cross_2+run20201023_isala_cross_3+run20201030_isala_cross_4+run20201106_isala_cross_5+run20201120_isala_cross_6+run20201204_isala_cross_8+run20201211_isala_cross_9+run20210119_isala_cross_7+Q0.Leeftijd+Q1.Q29_2.Monthly_FermFood
Monthly alcohol intake	0.595107	0.000622392	1.96414	0.093	0.228923	3043	~lib_size+read_conc_norm+run20201009_isala_cross_1+run20201016_isala_cross_2+run20201023_isala_cross_3+run20201030_isala_cross_4+run20201106_isala_cross_5+run20201120_isala_cross_6+run20201204_isala_cross_8+run20201211_isala_cross_9+run20210119_isala_cross_7+Q0.Leeftijd+Q1.Q29_3.Monthly_EtOH
Monthly meat	1.62826	0.00170292	5.38011	0.003	0.0192	3043	~lib_size+read_conc_norm+run20201009_isala_cross_1+run20201016_isala_cross_2+run20201023_isala_cross_3+run20201030_isala_cross_4+run20201106_isala_cross_5+run20201120_isala_cross_6+run20201204_isala_cross_8+run20201211_isala_cross_9+run20210119_isala_cross_7+Q0.Leeftijd+Q1.Q29_4.Monthly_Meat
Monthly animal products	0.282108	0.000295042	0.930776	0.408	0.595145	3043	~lib_size+read_conc_norm+run20201009_isala_cross_1+run20201016_isala_cross_2+run20201023_isala_cross_3+run20201030_isala_cross_4+run20201106_isala_cross_5+run20201120_isala_cross_6+run20201204_isala_cross_8+run20201211_isala_cross_9+run20210119_isala_cross_7+Q0.Leeftijd+Q1.Q29_5.Monthly_Animal_Prod
Monthly fish	0.443866	0.000464217	1.46473	0.202	0.388812	3043	~lib_size+read_conc_norm+run20201009_isala_cross_1+run20201016_isala_cross_2+run20201023_isala_cross_3+run20201030_isala_cross_4+run20201106_isala_cross_5+run20201120_isala_cross_6+run20201204_isala_cross_8+run20201211_isala_cross_9+run20210119_isala_cross_7+Q0.Leeftijd+Q1.Q29_6.Monthly_Fish
Monthly light beverages	1.07627	0.00112562	3.55407	0.011	0.0526355	3043	~lib_size+read_conc_norm+run20201009_isala_cross_1+run20201016_isala_cross_2+run20201023_isala_cross_3+run20201030_isala_cross_4+run20201106_isala_cross_5+run20201120_isala_cross_6+run20201204_isala_cross_8+run20201211_isala_cross_9+run20210119_isala_cross_7+Q0.Leeftijd+Q1.Q29_8.Monthly_Light_Beverages
Monthly fruit	0.117437	0.000122821	0.387396	0.854	0.892611	3043	~lib_size+read_conc_norm+run20201009_isala_cross_1+run20201016_isala_cross_2+run20201023_isala_cross_3+run20201030_isala_cross_4+run20201106_isala_cross_5+run20201120_isala_cross_6+run20201204_isala_cross_8+run20201211_isala_cross_9+run20210119_isala_cross_7+Q0.Leeftijd+Q1.Q29_9.Monthly_Fruit
Monthly vegetables	0.277929	0.000290672	0.916985	0.43	0.614685	3043	~lib_size+read_conc_norm+run20201009_isala_cross_1+run20201016_isala_cross_2+run20201023_isala_cross_3+run20201030_isala_cross_4+run20201106_isala_cross_5+run20201120_isala_cross_6+run20201204_isala_cross_8+run20201211_isala_cross_9+run20210119_isala_cross_7+Q0.Leeftijd+Q1.Q29_10.Monthly_Vegetables
Monthly use of vaginal probiotics (last 3 months)	0.107438	0.000112364	0.354411	0.871	0.902982	3043	~lib_size+read_conc_norm+run20201009_isala_cross_1+run20201016_isala_cross_2+run20201023_isala_cross_3+run20201030_isala_cross_4+run20201106_isala_cross_5+run20201120_isala_cross_6+run20201204_isala_cross_8+run20201211_isala_cross_9+run20210119_isala_cross_7+Q0.Leeftijd+Q1.Q56_3.Monthly_Vaginal_Probio_3Months
Redness	0.977021	0.00102182	3.22599	0.015	0.0679646	{False: 2925, True: 118}	~lib_size+read_conc_norm+run20201009_isala_cross_1+run20201016_isala_cross_2+run20201023_isala_cross_3+run20201030_isala_cross_4+run20201106_isala_cross_5+run20201120_isala_cross_6+run20201204_isala_cross_8+run20201211_isala_cross_9+run20210119_isala_cross_7+Q0.Leeftijd+Q2.30.Redness
Swelling	0.612812	0.000640909	2.02262	0.084	0.21397	{False: 2973, True: 70}	~lib_size+read_conc_norm+run20201009_isala_cross_1+run20201016_isala_cross_2+run20201023_isala_cross_3+run20201030_isala_cross_4+run20201106_isala_cross_5+run20201120_isala_cross_6+run20201204_isala_cross_8+run20201211_isala_cross_9+run20210119_isala_cross_7+Q0.Leeftijd+Q2.30.Swelling
General pain	0.248167	0.000259545	0.818761	0.484	0.648712	{False: 2965, True: 78}	~lib_size+read_conc_norm+run20201009_isala_cross_1+run20201016_isala_cross_2+run20201023_isala_cross_3+run20201030_isala_cross_4+run20201106_isala_cross_5+run20201120_isala_cross_6+run20201204_isala_cross_8+run20201211_isala_cross_9+run20210119_isala_cross_7+Q0.Leeftijd+Q2.30.General_pain
Itching	0.53892	0.000563629	1.77859	0.112	0.257148	{True: 411, False: 2632}	~lib_size+read_conc_norm+run20201009_isala_cross_1+run20201016_isala_cross_2+run20201023_isala_cross_3+run20201030_isala_cross_4+run20201106_isala_cross_5+run20201120_isala_cross_6+run20201204_isala_cross_8+run20201211_isala_cross_9+run20210119_isala_cross_7+Q0.Leeftijd+Q2.30.Iching
Burning feeling	0.363082	0.000379729	1.19804	0.291	0.493413	{False: 2867, True: 176}	~lib_size+read_conc_norm+run20201009_isala_cross_1+run20201016_isala_cross_2+run20201023_isala_cross_3+run20201030_isala_cross_4+run20201106_isala_cross_5+run20201120_isala_cross_6+run20201204_isala_cross_8+run20201211_isala_cross_9+run20210119_isala_cross_7+Q0.Leeftijd+Q2.30.Burning_feeling
Increased vaginal discharge	0.409188	0.000427949	1.35024	0.216	0.405099	{False: 2819, True: 224}	~lib_size+read_conc_norm+run20201009_isala_cross_1+run20201016_isala_cross_2+run20201023_isala_cross_3+run20201030_isala_cross_4+run20201106_isala_cross_5+run20201120_isala_cross_6+run20201204_isala_cross_8+run20201211_isala_cross_9+run20210119_isala_cross_7+Q0.Leeftijd+Q2.30.Increased_vaginal_discharge
Change in vaginal discharge color or smell	0.88838	0.000929112	2.93302	0.028	0.103884	{False: 2897, True: 146}	~lib_size+read_conc_norm+run20201009_isala_cross_1+run20201016_isala_cross_2+run20201023_isala_cross_3+run20201030_isala_cross_4+run20201106_isala_cross_5+run20201120_isala_cross_6+run20201204_isala_cross_8+run20201211_isala_cross_9+run20210119_isala_cross_7+Q0.Leeftijd+Q2.30.Change_vaginal_discharge_color_smell
Pain during sex	0.923315	0.000965649	3.04848	0.019	0.0817479	{False: 2858, True: 185}	~lib_size+read_conc_norm+run20201009_isala_cross_1+run20201016_isala_cross_2+run20201023_isala_cross_3+run20201030_isala_cross_4+run20201106_isala_cross_5+run20201120_isala_cross_6+run20201204_isala_cross_8+run20201211_isala_cross_9+run20210119_isala_cross_7+Q0.Leeftijd+Q2.30.Pain_during_sex
UTI	0.681659	0.000712913	2.25002	0.059	0.173609	{False: 2996, True: 47}	~lib_size+read_conc_norm+run20201009_isala_cross_1+run20201016_isala_cross_2+run20201023_isala_cross_3+run20201030_isala_cross_4+run20201106_isala_cross_5+run20201120_isala_cross_6+run20201204_isala_cross_8+run20201211_isala_cross_9+run20210119_isala_cross_7+Q0.Leeftijd+Q2.30.Urinary_infection
Other vaginal health complaints	0.28657	0.000299709	0.945502	0.371	0.569905	{False: 2935, True: 108}	~lib_size+read_conc_norm+run20201009_isala_cross_1+run20201016_isala_cross_2+run20201023_isala_cross_3+run20201030_isala_cross_4+run20201106_isala_cross_5+run20201120_isala_cross_6+run20201204_isala_cross_8+run20201211_isala_cross_9+run20210119_isala_cross_7+Q0.Leeftijd+Q2.30.Other
Smoker	0.592217	0.000619369	1.9546	0.113	0.258286	{False: 2827, True: 216}	~lib_size+read_conc_norm+run20201009_isala_cross_1+run20201016_isala_cross_2+run20201023_isala_cross_3+run20201030_isala_cross_4+run20201106_isala_cross_5+run20201120_isala_cross_6+run20201204_isala_cross_8+run20201211_isala_cross_9+run20210119_isala_cross_7+Q0.Leeftijd+Q1.Q21.Current_smoker
Drug user	0.408776	0.000427518	1.34888	0.243	0.436547	{False: 2780, True: 263}	~lib_size+read_conc_norm+run20201009_isala_cross_1+run20201016_isala_cross_2+run20201023_isala_cross_3+run20201030_isala_cross_4+run20201106_isala_cross_5+run20201120_isala_cross_6+run20201204_isala_cross_8+run20201211_isala_cross_9+run20210119_isala_cross_7+Q0.Leeftijd+Q1.Q21.Current_druguser
High endogenous estrogen	0.678744	0.000709864	2.24039	0.064	0.183061	{True: 395, False: 2648}	~lib_size+read_conc_norm+run20201009_isala_cross_1+run20201016_isala_cross_2+run20201023_isala_cross_3+run20201030_isala_cross_4+run20201106_isala_cross_5+run20201120_isala_cross_6+run20201204_isala_cross_8+run20201211_isala_cross_9+run20210119_isala_cross_7+Q0.Leeftijd+A.high_endogenous_estrogen
High exogenous estrogen	1.39977	0.00146395	4.62397	0.004	0.0232727	{False: 2603, True: 440}	~lib_size+read_conc_norm+run20201009_isala_cross_1+run20201016_isala_cross_2+run20201023_isala_cross_3+run20201030_isala_cross_4+run20201106_isala_cross_5+run20201120_isala_cross_6+run20201204_isala_cross_8+run20201211_isala_cross_9+run20210119_isala_cross_7+Q0.Leeftijd+A.high_exogenous_estrogen
High endogenous progestogen	0.660201	0.00069047	2.17914	0.073	0.196716	{False: 1031, True: 2012}	~lib_size+read_conc_norm+run20201009_isala_cross_1+run20201016_isala_cross_2+run20201023_isala_cross_3+run20201030_isala_cross_4+run20201106_isala_cross_5+run20201120_isala_cross_6+run20201204_isala_cross_8+run20201211_isala_cross_9+run20210119_isala_cross_7+Q0.Leeftijd+A.high_endogenous_progestogen
High exogenous progestogen	0.660201	0.00069047	2.17914	0.074	0.198366	{False: 1031, True: 2012}	~lib_size+read_conc_norm+run20201009_isala_cross_1+run20201016_isala_cross_2+run20201023_isala_cross_3+run20201030_isala_cross_4+run20201106_isala_cross_5+run20201120_isala_cross_6+run20201204_isala_cross_8+run20201211_isala_cross_9+run20210119_isala_cross_7+Q0.Leeftijd+A.high_exogenous_progestogen
Increased stress	0.261381	0.000273365	0.86237	0.461	0.637968	3043	~lib_size+read_conc_norm+run20201009_isala_cross_1+run20201016_isala_cross_2+run20201023_isala_cross_3+run20201030_isala_cross_4+run20201106_isala_cross_5+run20201120_isala_cross_6+run20201204_isala_cross_8+run20201211_isala_cross_9+run20210119_isala_cross_7+Q0.Leeftijd+Q2.Q20.Increase_in_stress_or_feeling_down
Vaginal douching	0.159298	0.000166601	0.52551	0.717	0.818062	{False: 2914, True: 129}	~lib_size+read_conc_norm+run20201009_isala_cross_1+run20201016_isala_cross_2+run20201023_isala_cross_3+run20201030_isala_cross_4+run20201106_isala_cross_5+run20201120_isala_cross_6+run20201204_isala_cross_8+run20201211_isala_cross_9+run20210119_isala_cross_7+Q0.Leeftijd+Q1.Q70.Vaginal_douching
Born in belgium	0.622938	0.000651499	2.05606	0.093	0.228923	{True: 2878, False: 165}	~lib_size+read_conc_norm+run20201009_isala_cross_1+run20201016_isala_cross_2+run20201023_isala_cross_3+run20201030_isala_cross_4+run20201106_isala_cross_5+run20201120_isala_cross_6+run20201204_isala_cross_8+run20201211_isala_cross_9+run20210119_isala_cross_7+Q0.Leeftijd+Q1.Q8.Belgian_born
Antibiotics (last 3 months)	0.268958	0.00028129	0.887378	0.431	0.614685	{True: 631, False: 2412}	~lib_size+read_conc_norm+run20201009_isala_cross_1+run20201016_isala_cross_2+run20201023_isala_cross_3+run20201030_isala_cross_4+run20201106_isala_cross_5+run20201120_isala_cross_6+run20201204_isala_cross_8+run20201211_isala_cross_9+run20210119_isala_cross_7+Q0.Leeftijd+Q1.Q40.Antibiotic_use_last_3_months
Antibiotics (ever)	0.469787	0.000529641	1.54806	0.171	0.351614	{True: 2711, False: 111, nan: 221}	~lib_size+read_conc_norm+run20201009_isala_cross_1+run20201016_isala_cross_2+run20201023_isala_cross_3+run20201030_isala_cross_4+run20201106_isala_cross_5+run20201120_isala_cross_6+run20201204_isala_cross_8+run20201211_isala_cross_9+run20210119_isala_cross_7+Q0.Leeftijd+Q1.Q41.Ever_antibiotic_treatment
Vaginal intercourse (in last 3 months)	0.861346	0.00109726	2.84434	0.028	0.103884	{True: 612, False: 1898, nan: 533}	~lib_size+read_conc_norm+run20201009_isala_cross_1+run20201016_isala_cross_2+run20201023_isala_cross_3+run20201030_isala_cross_4+run20201106_isala_cross_5+run20201120_isala_cross_6+run20201204_isala_cross_8+run20201211_isala_cross_9+run20210119_isala_cross_7+Q0.Leeftijd+Q1.Q48.2.Vaginal_sex_during_period_last_3months
New medication	0.340719	0.000357805	1.12445	0.289	0.493227	{False: 2573, True: 458, nan: 12}	~lib_size+read_conc_norm+run20201009_isala_cross_1+run20201016_isala_cross_2+run20201023_isala_cross_3+run20201030_isala_cross_4+run20201106_isala_cross_5+run20201120_isala_cross_6+run20201204_isala_cross_8+run20201211_isala_cross_9+run20210119_isala_cross_7+Q0.Leeftijd+Q2.Q29.Recent_new_medication
Took a bath (in last 24h)	0.131187	0.000137202	0.432762	0.792	0.866462	{False: 2815, True: 228}	~lib_size+read_conc_norm+run20201009_isala_cross_1+run20201016_isala_cross_2+run20201023_isala_cross_3+run20201030_isala_cross_4+run20201106_isala_cross_5+run20201120_isala_cross_6+run20201204_isala_cross_8+run20201211_isala_cross_9+run20210119_isala_cross_7+Q0.Leeftijd+Q2.32.Took_a_bath
Took a shower (in last 24h)	0.421388	0.000440709	1.39052	0.234	0.426363	{False: 2209, True: 834}	~lib_size+read_conc_norm+run20201009_isala_cross_1+run20201016_isala_cross_2+run20201023_isala_cross_3+run20201030_isala_cross_4+run20201106_isala_cross_5+run20201120_isala_cross_6+run20201204_isala_cross_8+run20201211_isala_cross_9+run20210119_isala_cross_7+Q0.Leeftijd+Q2.32.Took_a_shower
Slept with underwear (in last 24h)	0.431181	0.00045095	1.42285	0.199	0.385939	{False: 2409, True: 634}	~lib_size+read_conc_norm+run20201009_isala_cross_1+run20201016_isala_cross_2+run20201023_isala_cross_3+run20201030_isala_cross_4+run20201106_isala_cross_5+run20201120_isala_cross_6+run20201204_isala_cross_8+run20201211_isala_cross_9+run20210119_isala_cross_7+Q0.Leeftijd+Q2.32.Slept_with_underwear
Only washed vagina (in last 24h)	0.263349	0.000275423	0.868864	0.451	0.634374	{False: 2966, True: 77}	~lib_size+read_conc_norm+run20201009_isala_cross_1+run20201016_isala_cross_2+run20201023_isala_cross_3+run20201030_isala_cross_4+run20201106_isala_cross_5+run20201120_isala_cross_6+run20201204_isala_cross_8+run20201211_isala_cross_9+run20210119_isala_cross_7+Q0.Leeftijd+Q2.32.Only_washed_vagina
Had abortion	0.806386	0.000843359	2.66208	0.046	0.146286	{False: 2927, True: 116}	~lib_size+read_conc_norm+run20201009_isala_cross_1+run20201016_isala_cross_2+run20201023_isala_cross_3+run20201030_isala_cross_4+run20201106_isala_cross_5+run20201120_isala_cross_6+run20201204_isala_cross_8+run20201211_isala_cross_9+run20210119_isala_cross_7+Q0.Leeftijd+Q1.Q50.abortion
Ovulation phase	0.440644	0.00134372	1.42622	0.21	0.398222	{True: 395, nan: 2012, False: 636}	~lib_size+read_conc_norm+run20201009_isala_cross_1+run20201016_isala_cross_2+run20201023_isala_cross_3+run20201030_isala_cross_4+run20201106_isala_cross_5+run20201120_isala_cross_6+run20201204_isala_cross_8+run20201211_isala_cross_9+run20210119_isala_cross_7+Q0.Leeftijd+A.has_cycle.phase.ovulation
Partner is man	0.501526	0.000664454	1.63363	0.155	0.330667	{True: 2317, False: 58, nan: 668}	~lib_size+read_conc_norm+run20201009_isala_cross_1+run20201016_isala_cross_2+run20201023_isala_cross_3+run20201030_isala_cross_4+run20201106_isala_cross_5+run20201120_isala_cross_6+run20201204_isala_cross_8+run20201211_isala_cross_9+run20210119_isala_cross_7+Q0.Leeftijd+Q1.Q4.has_partner.Man
Partner is woman	0.501526	0.000664454	1.63363	0.144	0.312407	{False: 2317, True: 58, nan: 668}	~lib_size+read_conc_norm+run20201009_isala_cross_1+run20201016_isala_cross_2+run20201023_isala_cross_3+run20201030_isala_cross_4+run20201106_isala_cross_5+run20201120_isala_cross_6+run20201204_isala_cross_8+run20201211_isala_cross_9+run20210119_isala_cross_7+Q0.Leeftijd+Q1.Q4.has_partner.Vrouw
Number of vaginal complaints	1.48462	0.00155269	4.90473	0.005	0.027234	3043	~lib_size+read_conc_norm+run20201009_isala_cross_1+run20201016_isala_cross_2+run20201023_isala_cross_3+run20201030_isala_cross_4+run20201106_isala_cross_5+run20201120_isala_cross_6+run20201204_isala_cross_8+run20201211_isala_cross_9+run20210119_isala_cross_7+Q0.Leeftijd+Q2.Q30.n_vaginal_complaints
Has vaginal complaints	0.466221	0.000487597	1.53854	0.165	0.347654	{True: 923, False: 2120}	~lib_size+read_conc_norm+run20201009_isala_cross_1+run20201016_isala_cross_2+run20201023_isala_cross_3+run20201030_isala_cross_4+run20201106_isala_cross_5+run20201120_isala_cross_6+run20201204_isala_cross_8+run20201211_isala_cross_9+run20210119_isala_cross_7+Q0.Leeftijd+Q2.Q30.has_vaginal_complaints
Mental health: Nervous	0.711742	0.000744375	2.34939	0.063	0.181213	{False: 2323, True: 720}	~lib_size+read_conc_norm+run20201009_isala_cross_1+run20201016_isala_cross_2+run20201023_isala_cross_3+run20201030_isala_cross_4+run20201106_isala_cross_5+run20201120_isala_cross_6+run20201204_isala_cross_8+run20201211_isala_cross_9+run20210119_isala_cross_7+Q0.Leeftijd+Q1.Q46.nervous
Mental health: Nothing can cheer me up	0.326076	0.000341026	1.07589	0.351	0.556384	{False: 2879, True: 164}	~lib_size+read_conc_norm+run20201009_isala_cross_1+run20201016_isala_cross_2+run20201023_isala_cross_3+run20201030_isala_cross_4+run20201106_isala_cross_5+run20201120_isala_cross_6+run20201204_isala_cross_8+run20201211_isala_cross_9+run20210119_isala_cross_7+Q0.Leeftijd+Q1.Q46.nothing_to_cheer_up
Mental health: Calm	0.458527	0.00047955	1.51314	0.184	0.365147	{True: 2080, False: 963}	~lib_size+read_conc_norm+run20201009_isala_cross_1+run20201016_isala_cross_2+run20201023_isala_cross_3+run20201030_isala_cross_4+run20201106_isala_cross_5+run20201120_isala_cross_6+run20201204_isala_cross_8+run20201211_isala_cross_9+run20210119_isala_cross_7+Q0.Leeftijd+Q1.Q46.calm
Mental health: Sad	0.225152	0.000235475	0.74281	0.549	0.690196	{False: 2687, True: 356}	~lib_size+read_conc_norm+run20201009_isala_cross_1+run20201016_isala_cross_2+run20201023_isala_cross_3+run20201030_isala_cross_4+run20201106_isala_cross_5+run20201120_isala_cross_6+run20201204_isala_cross_8+run20201211_isala_cross_9+run20210119_isala_cross_7+Q0.Leeftijd+Q1.Q46.sad
Mental health: Happy	0.293395	0.000306847	0.968027	0.38	0.575434	{True: 2404, False: 639}	~lib_size+read_conc_norm+run20201009_isala_cross_1+run20201016_isala_cross_2+run20201023_isala_cross_3+run20201030_isala_cross_4+run20201106_isala_cross_5+run20201120_isala_cross_6+run20201204_isala_cross_8+run20201211_isala_cross_9+run20210119_isala_cross_7+Q0.Leeftijd+Q1.Q46.happy
Mental health: Stressed	0.346747	0.000362645	1.14412	0.281	0.484418	{True: 1073, False: 1970}	~lib_size+read_conc_norm+run20201009_isala_cross_1+run20201016_isala_cross_2+run20201023_isala_cross_3+run20201030_isala_cross_4+run20201106_isala_cross_5+run20201120_isala_cross_6+run20201204_isala_cross_8+run20201211_isala_cross_9+run20210119_isala_cross_7+Q0.Leeftijd+Q1.Q46.stressed
Frequency of sex	0.462969	0.000576638	1.52551	0.17	0.351614	2560	~lib_size+read_conc_norm+run20201009_isala_cross_1+run20201016_isala_cross_2+run20201023_isala_cross_3+run20201030_isala_cross_4+run20201106_isala_cross_5+run20201120_isala_cross_6+run20201204_isala_cross_8+run20201211_isala_cross_9+run20210119_isala_cross_7+Q0.Leeftijd+Q1.Q48.1_sex_frequency
Non-belgian identity	0.10268	0.000107388	0.338713	0.876	0.903889	{False: 2743, True: 300}	~lib_size+read_conc_norm+run20201009_isala_cross_1+run20201016_isala_cross_2+run20201023_isala_cross_3+run20201030_isala_cross_4+run20201106_isala_cross_5+run20201120_isala_cross_6+run20201204_isala_cross_8+run20201211_isala_cross_9+run20210119_isala_cross_7+Q0.Leeftijd+Q1.Q13_1.Other_cultural_identity
PPI use	0.266225	0.000278432	0.878358	0.423	0.610073	{False: 2944, True: 99}	~lib_size+read_conc_norm+run20201009_isala_cross_1+run20201016_isala_cross_2+run20201023_isala_cross_3+run20201030_isala_cross_4+run20201106_isala_cross_5+run20201120_isala_cross_6+run20201204_isala_cross_8+run20201211_isala_cross_9+run20210119_isala_cross_7+Q0.Leeftijd+Q1.Q42.ppi_use
Hygeine: Tampon (last 48 hours)	0.249523	0.000259599	0.822877	0.464	0.637968	{False: 2957, True: 101}	~lib_size+read_conc_norm+run20201009_isala_cross_1+run20201016_isala_cross_2+run20201023_isala_cross_3+run20201030_isala_cross_4+run20201106_isala_cross_5+run20201120_isala_cross_6+run20201204_isala_cross_8+run20201211_isala_cross_9+run20210119_isala_cross_7+Q0.Leeftijd+Q2.Q29_48h_Tampon
Hygeine: Cup (last 48 hours)	0.461418	0.000480051	1.52202	0.168	0.351086	{False: 2980, True: 78}	~lib_size+read_conc_norm+run20201009_isala_cross_1+run20201016_isala_cross_2+run20201023_isala_cross_3+run20201030_isala_cross_4+run20201106_isala_cross_5+run20201120_isala_cross_6+run20201204_isala_cross_8+run20201211_isala_cross_9+run20210119_isala_cross_7+Q0.Leeftijd+Q2.Q29_48h_Menstruatiecup
Hygeine: Pantyliner (last 48 hours)	0.717968	0.00074696	2.36892	0.062	0.179345	{True: 727, False: 2331}	~lib_size+read_conc_norm+run20201009_isala_cross_1+run20201016_isala_cross_2+run20201023_isala_cross_3+run20201030_isala_cross_4+run20201106_isala_cross_5+run20201120_isala_cross_6+run20201204_isala_cross_8+run20201211_isala_cross_9+run20210119_isala_cross_7+Q0.Leeftijd+Q2.Q29_48h_Inlegkruisje
Hygeine: Tampon	0.762386	0.000793172	2.5156	0.048	0.150773	{False: 1720, True: 1338}	~lib_size+read_conc_norm+run20201009_isala_cross_1+run20201016_isala_cross_2+run20201023_isala_cross_3+run20201030_isala_cross_4+run20201106_isala_cross_5+run20201120_isala_cross_6+run20201204_isala_cross_8+run20201211_isala_cross_9+run20210119_isala_cross_7+Q0.Leeftijd+Q1.Q52.8_period_hygeine_Tampon
Hygeine: Pantyliner	0.243939	0.000253789	0.804456	0.517	0.671838	{True: 1054, False: 2004}	~lib_size+read_conc_norm+run20201009_isala_cross_1+run20201016_isala_cross_2+run20201023_isala_cross_3+run20201030_isala_cross_4+run20201106_isala_cross_5+run20201120_isala_cross_6+run20201204_isala_cross_8+run20201211_isala_cross_9+run20210119_isala_cross_7+Q0.Leeftijd+Q1.Q52.8_period_hygeine_Inlegkruisje
Time to sample arrival	0.10211	0.000106388	0.336655	0.873	0.902982	3054	~lib_size+read_conc_norm+run20201009_isala_cross_1+run20201016_isala_cross_2+run20201023_isala_cross_3+run20201030_isala_cross_4+run20201106_isala_cross_5+run20201120_isala_cross_6+run20201204_isala_cross_8+run20201211_isala_cross_9+run20210119_isala_cross_7+Q0.Leeftijd+A.time_to_arrival
Vegetarian	0.082064	8.58266e-05	0.2707	0.922	0.930818	{False: 2869, True: 174}	~lib_size+read_conc_norm+run20201009_isala_cross_1+run20201016_isala_cross_2+run20201023_isala_cross_3+run20201030_isala_cross_4+run20201106_isala_cross_5+run20201120_isala_cross_6+run20201204_isala_cross_8+run20201211_isala_cross_9+run20210119_isala_cross_7+Q0.Leeftijd+Q1.Q29.vegetarian
Pescetarian	0.5771	0.00060356	1.90467	0.107	0.250155	{False: 2728, True: 315}	~lib_size+read_conc_norm+run20201009_isala_cross_1+run20201016_isala_cross_2+run20201023_isala_cross_3+run20201030_isala_cross_4+run20201106_isala_cross_5+run20201120_isala_cross_6+run20201204_isala_cross_8+run20201211_isala_cross_9+run20210119_isala_cross_7+Q0.Leeftijd+Q1.Q29.pescetarian
Vegan	0.0796452	8.32969e-05	0.26272	0.953	0.953	{False: 2878, True: 165}	~lib_size+read_conc_norm+run20201009_isala_cross_1+run20201016_isala_cross_2+run20201023_isala_cross_3+run20201030_isala_cross_4+run20201106_isala_cross_5+run20201120_isala_cross_6+run20201204_isala_cross_8+run20201211_isala_cross_9+run20210119_isala_cross_7+Q0.Leeftijd+Q1.Q29.vegan
Living in urbanised area	0.62318	0.000651752	2.05686	0.097	0.235374	{True: 2524, False: 519}	~lib_size+read_conc_norm+run20201009_isala_cross_1+run20201016_isala_cross_2+run20201023_isala_cross_3+run20201030_isala_cross_4+run20201106_isala_cross_5+run20201120_isala_cross_6+run20201204_isala_cross_8+run20201211_isala_cross_9+run20210119_isala_cross_7+Q0.Leeftijd+Q1.Q15.living_in_urban_area
Living in countryside	0.62318	0.000651752	2.05686	0.089	0.222283	{False: 2524, True: 519}	~lib_size+read_conc_norm+run20201009_isala_cross_1+run20201016_isala_cross_2+run20201023_isala_cross_3+run20201030_isala_cross_4+run20201106_isala_cross_5+run20201120_isala_cross_6+run20201204_isala_cross_8+run20201211_isala_cross_9+run20210119_isala_cross_7+Q0.Leeftijd+Q1.Q15.living_in_coutryside
First 3 years in belgium	0.373051	0.000390155	1.23095	0.285	0.489664	{True: 2898, False: 145}	~lib_size+read_conc_norm+run20201009_isala_cross_1+run20201016_isala_cross_2+run20201023_isala_cross_3+run20201030_isala_cross_4+run20201106_isala_cross_5+run20201120_isala_cross_6+run20201204_isala_cross_8+run20201211_isala_cross_9+run20210119_isala_cross_7+Q0.Leeftijd+Q1.Q9.first_3_years_in_belgium
Monogamous partner	2.05059	0.0023135	6.74308	0.001	0.00867797	{nan: 241, True: 2319, False: 483}	~lib_size+read_conc_norm+run20201009_isala_cross_1+run20201016_isala_cross_2+run20201023_isala_cross_3+run20201030_isala_cross_4+run20201106_isala_cross_5+run20201120_isala_cross_6+run20201204_isala_cross_8+run20201211_isala_cross_9+run20210119_isala_cross_7+Q0.Leeftijd+Q1.Q47.one_partner_vs_single
Multiple partners	0.917454	0.00114271	3.02485	0.031	0.105813	{False: 241, True: 2319, nan: 483}	~lib_size+read_conc_norm+run20201009_isala_cross_1+run20201016_isala_cross_2+run20201023_isala_cross_3+run20201030_isala_cross_4+run20201106_isala_cross_5+run20201120_isala_cross_6+run20201204_isala_cross_8+run20201211_isala_cross_9+run20210119_isala_cross_7+Q0.Leeftijd+Q1.Q47.one_partner_vs_many
% contribution to household income	1.33803	0.00140117	4.42161	0.005	0.027234	3040	~lib_size+read_conc_norm+run20201009_isala_cross_1+run20201016_isala_cross_2+run20201023_isala_cross_3+run20201030_isala_cross_4+run20201106_isala_cross_5+run20201120_isala_cross_6+run20201204_isala_cross_8+run20201211_isala_cross_9+run20210119_isala_cross_7+Q0.Leeftijd+Q2.Q27.contribution_to_household_income
Financial difficulties	0.519839	0.000544068	1.71586	0.126	0.280487	{False: 2647, True: 394, nan: 2}	~lib_size+read_conc_norm+run20201009_isala_cross_1+run20201016_isala_cross_2+run20201023_isala_cross_3+run20201030_isala_cross_4+run20201106_isala_cross_5+run20201120_isala_cross_6+run20201204_isala_cross_8+run20201211_isala_cross_9+run20210119_isala_cross_7+Q0.Leeftijd+Q2.Q4.financial_difficulties
Poverty	0.630958	0.000952368	2.0813	0.07	0.192688	{False: 1946, nan: 934, True: 163}	~lib_size+read_conc_norm+run20201009_isala_cross_1+run20201016_isala_cross_2+run20201023_isala_cross_3+run20201030_isala_cross_4+run20201106_isala_cross_5+run20201120_isala_cross_6+run20201204_isala_cross_8+run20201211_isala_cross_9+run20210119_isala_cross_7+Q0.Leeftijd+Q2.Q5.poverty
HPV Vaccinated	1.18952	0.00124406	3.92854	0.009	0.0438857	{True: 1221, False: 1822}	~lib_size+read_conc_norm+run20201009_isala_cross_1+run20201016_isala_cross_2+run20201023_isala_cross_3+run20201030_isala_cross_4+run20201106_isala_cross_5+run20201120_isala_cross_6+run20201204_isala_cross_8+run20201211_isala_cross_9+run20210119_isala_cross_7+Q0.Leeftijd+Q1.Q58.hpv_vaccinated
Unknown intercourse in last 24h	0.20238	0.000211659	0.667668	0.598	0.735463	3043	~lib_size+read_conc_norm+run20201009_isala_cross_1+run20201016_isala_cross_2+run20201023_isala_cross_3+run20201030_isala_cross_4+run20201106_isala_cross_5+run20201120_isala_cross_6+run20201204_isala_cross_8+run20201211_isala_cross_9+run20210119_isala_cross_7+Q0.Leeftijd+A.IntercourseUnknown
Health status: Good	0.193657	0.000202536	0.638884	0.62	0.75581	3043	~lib_size+read_conc_norm+run20201009_isala_cross_1+run20201016_isala_cross_2+run20201023_isala_cross_3+run20201030_isala_cross_4+run20201106_isala_cross_5+run20201120_isala_cross_6+run20201204_isala_cross_8+run20201211_isala_cross_9+run20210119_isala_cross_7+Q0.Leeftijd+Q1.Q34.Hoe_beoordeel_je_je_algemene_gezondheidstoestandGoed
Health status: Acceptable	0.608944	0.000636864	2.00984	0.09	0.223689	3043	~lib_size+read_conc_norm+run20201009_isala_cross_1+run20201016_isala_cross_2+run20201023_isala_cross_3+run20201030_isala_cross_4+run20201106_isala_cross_5+run20201120_isala_cross_6+run20201204_isala_cross_8+run20201211_isala_cross_9+run20210119_isala_cross_7+Q0.Leeftijd+Q1.Q34.Hoe_beoordeel_je_je_algemene_gezondheidstoestandRedelijk
Health status: Poor	0.223012	0.000233237	0.73575	0.541	0.687723	3043	~lib_size+read_conc_norm+run20201009_isala_cross_1+run20201016_isala_cross_2+run20201023_isala_cross_3+run20201030_isala_cross_4+run20201106_isala_cross_5+run20201120_isala_cross_6+run20201204_isala_cross_8+run20201211_isala_cross_9+run20210119_isala_cross_7+Q0.Leeftijd+Q1.Q34.Hoe_beoordeel_je_je_algemene_gezondheidstoestandSlecht
Health status: Very good	0.367336	0.000384178	1.21209	0.26	0.459034	3043	~lib_size+read_conc_norm+run20201009_isala_cross_1+run20201016_isala_cross_2+run20201023_isala_cross_3+run20201030_isala_cross_4+run20201106_isala_cross_5+run20201120_isala_cross_6+run20201204_isala_cross_8+run20201211_isala_cross_9+run20210119_isala_cross_7+Q0.Leeftijd+Q1.Q34.Hoe_beoordeel_je_je_algemene_gezondheidstoestandZeer_goed
Health status: Very poor	0.369631	0.000386578	1.21966	0.315	0.513631	3043	~lib_size+read_conc_norm+run20201009_isala_cross_1+run20201016_isala_cross_2+run20201023_isala_cross_3+run20201030_isala_cross_4+run20201106_isala_cross_5+run20201120_isala_cross_6+run20201204_isala_cross_8+run20201211_isala_cross_9+run20210119_isala_cross_7+Q0.Leeftijd+Q1.Q34.Hoe_beoordeel_je_je_algemene_gezondheidstoestandZeer_slecht
Relationship status: Multiple partners	0.312044	0.000326351	1.02958	0.373	0.569905	3043	~lib_size+read_conc_norm+run20201009_isala_cross_1+run20201016_isala_cross_2+run20201023_isala_cross_3+run20201030_isala_cross_4+run20201106_isala_cross_5+run20201120_isala_cross_6+run20201204_isala_cross_8+run20201211_isala_cross_9+run20210119_isala_cross_7+Q0.Leeftijd+Q1.Q3.Zo_beschrijf_je_best_mijn_huidige_relatiestatus.CLEANEDWisselende_partners
Weeknight <7hA	0.245871	0.000257144	0.811184	0.541	0.687723	3043	~lib_size+read_conc_norm+run20201009_isala_cross_1+run20201016_isala_cross_2+run20201023_isala_cross_3+run20201030_isala_cross_4+run20201106_isala_cross_5+run20201120_isala_cross_6+run20201204_isala_cross_8+run20201211_isala_cross_9+run20210119_isala_cross_7+Q0.Leeftijd+Q1.Q25_1.Hours_Sleep_weekA.A
Weeknight sleep: 7-8.5h	0.69576	0.00072766	2.2966	0.057	0.169674	3043	~lib_size+read_conc_norm+run20201009_isala_cross_1+run20201016_isala_cross_2+run20201023_isala_cross_3+run20201030_isala_cross_4+run20201106_isala_cross_5+run20201120_isala_cross_6+run20201204_isala_cross_8+run20201211_isala_cross_9+run20210119_isala_cross_7+Q0.Leeftijd+Q1.Q25_1.Hours_Sleep_weekB
Weeknight sleep: >9h	0.128976	0.00013489	0.425468	0.803	0.873987	3043	~lib_size+read_conc_norm+run20201009_isala_cross_1+run20201016_isala_cross_2+run20201023_isala_cross_3+run20201030_isala_cross_4+run20201106_isala_cross_5+run20201120_isala_cross_6+run20201204_isala_cross_8+run20201211_isala_cross_9+run20210119_isala_cross_7+Q0.Leeftijd+Q1.Q25_1.Hours_Sleep_weekC
Weekend sleep: <7h	0.754179	0.000788758	2.48959	0.047	0.148543	3043	~lib_size+read_conc_norm+run20201009_isala_cross_1+run20201016_isala_cross_2+run20201023_isala_cross_3+run20201030_isala_cross_4+run20201106_isala_cross_5+run20201120_isala_cross_6+run20201204_isala_cross_8+run20201211_isala_cross_9+run20210119_isala_cross_7+Q0.Leeftijd+Q1.Q25_2.Hours_Sleep_weekendA
Weekend sleep: >9hA	0.719259	0.000752237	2.37423	0.022	0.0915772	3043	~lib_size+read_conc_norm+run20201009_isala_cross_1+run20201016_isala_cross_2+run20201023_isala_cross_3+run20201030_isala_cross_4+run20201106_isala_cross_5+run20201120_isala_cross_6+run20201204_isala_cross_8+run20201211_isala_cross_9+run20210119_isala_cross_7+Q0.Leeftijd+Q1.Q25_2.Hours_Sleep_weekendC.A
Wipe direction: Front to back	0.571056	0.000597239	1.88471	0.11	0.256	3043	~lib_size+read_conc_norm+run20201009_isala_cross_1+run20201016_isala_cross_2+run20201023_isala_cross_3+run20201030_isala_cross_4+run20201106_isala_cross_5+run20201120_isala_cross_6+run20201204_isala_cross_8+run20201211_isala_cross_9+run20210119_isala_cross_7+Q0.Leeftijd+Q2.Q33.Wipe_directionA
Wipe direction: Back to front	0.362743	0.000379374	1.19692	0.26	0.459034	3043	~lib_size+read_conc_norm+run20201009_isala_cross_1+run20201016_isala_cross_2+run20201023_isala_cross_3+run20201030_isala_cross_4+run20201106_isala_cross_5+run20201120_isala_cross_6+run20201204_isala_cross_8+run20201211_isala_cross_9+run20210119_isala_cross_7+Q0.Leeftijd+Q2.Q33.Wipe_directionB
Wipe direction: Both directions	0.554083	0.000579488	1.82866	0.13	0.288139	3043	~lib_size+read_conc_norm+run20201009_isala_cross_1+run20201016_isala_cross_2+run20201023_isala_cross_3+run20201030_isala_cross_4+run20201106_isala_cross_5+run20201120_isala_cross_6+run20201204_isala_cross_8+run20201211_isala_cross_9+run20210119_isala_cross_7+Q0.Leeftijd+Q2.Q33.Wipe_directionC
Wipe direction: No wipe	0.431796	0.000451594	1.42488	0.231	0.425439	3043	~lib_size+read_conc_norm+run20201009_isala_cross_1+run20201016_isala_cross_2+run20201023_isala_cross_3+run20201030_isala_cross_4+run20201106_isala_cross_5+run20201120_isala_cross_6+run20201204_isala_cross_8+run20201211_isala_cross_9+run20210119_isala_cross_7+Q0.Leeftijd+Q2.Q33.Wipe_directionD
Wipe direction: Other	0.55843	0.000584034	1.84302	0.123	0.275004	3043	~lib_size+read_conc_norm+run20201009_isala_cross_1+run20201016_isala_cross_2+run20201023_isala_cross_3+run20201030_isala_cross_4+run20201106_isala_cross_5+run20201120_isala_cross_6+run20201204_isala_cross_8+run20201211_isala_cross_9+run20210119_isala_cross_7+Q0.Leeftijd+Q2.Q33.Wipe_directionE
BMI	3.33876	0.00349438	11.0544	9.999e-05	0.00511949	3041	~lib_size+read_conc_norm+run20201009_isala_cross_1+run20201016_isala_cross_2+run20201023_isala_cross_3+run20201030_isala_cross_4+run20201106_isala_cross_5+run20201120_isala_cross_6+run20201204_isala_cross_8+run20201211_isala_cross_9+run20210119_isala_cross_7+Q0.Leeftijd+Q2.BMI
Has children	13.002	0.0135981	43.5007	9.999e-05	0.00511949	{True: 1130, False: 1913}	~lib_size+read_conc_norm+run20201009_isala_cross_1+run20201016_isala_cross_2+run20201023_isala_cross_3+run20201030_isala_cross_4+run20201106_isala_cross_5+run20201120_isala_cross_6+run20201204_isala_cross_8+run20201211_isala_cross_9+run20210119_isala_cross_7+Q0.Leeftijd+Q1.Q6.Has_children
Contraceptive: Combination pill	1.14811	0.00120075	3.79159	0.00869913	0.0436662	{False: 2124, True: 919}	~lib_size+read_conc_norm+run20201009_isala_cross_1+run20201016_isala_cross_2+run20201023_isala_cross_3+run20201030_isala_cross_4+run20201106_isala_cross_5+run20201120_isala_cross_6+run20201204_isala_cross_8+run20201211_isala_cross_9+run20210119_isala_cross_7+Q0.Leeftijd+Q2.Q25.Pill_combined
Frequency of alcohol intake	1.71106	0.00178952	5.65422	0.00119988	0.010239	3043	~lib_size+read_conc_norm+run20201009_isala_cross_1+run20201016_isala_cross_2+run20201023_isala_cross_3+run20201030_isala_cross_4+run20201106_isala_cross_5+run20201120_isala_cross_6+run20201204_isala_cross_8+run20201211_isala_cross_9+run20210119_isala_cross_7+Q0.Leeftijd+Q1.Q29_3.Freq_EtOH
Frequency of meat	1.24644	0.00130359	4.11679	0.00649935	0.0339558	3043	~lib_size+read_conc_norm+run20201009_isala_cross_1+run20201016_isala_cross_2+run20201023_isala_cross_3+run20201030_isala_cross_4+run20201106_isala_cross_5+run20201120_isala_cross_6+run20201204_isala_cross_8+run20201211_isala_cross_9+run20210119_isala_cross_7+Q0.Leeftijd+Q1.Q29_4.Freq_Meat
Frequency of fish	0.733308	0.00076693	2.42064	0.0511949	0.157902	3043	~lib_size+read_conc_norm+run20201009_isala_cross_1+run20201016_isala_cross_2+run20201023_isala_cross_3+run20201030_isala_cross_4+run20201106_isala_cross_5+run20201120_isala_cross_6+run20201204_isala_cross_8+run20201211_isala_cross_9+run20210119_isala_cross_7+Q0.Leeftijd+Q1.Q29_6.Freq_Fish
Frequency of sugary beverages	2.42218	0.00253323	8.01031	9.999e-05	0.00511949	3043	~lib_size+read_conc_norm+run20201009_isala_cross_1+run20201016_isala_cross_2+run20201023_isala_cross_3+run20201030_isala_cross_4+run20201106_isala_cross_5+run20201120_isala_cross_6+run20201204_isala_cross_8+run20201211_isala_cross_9+run20210119_isala_cross_7+Q0.Leeftijd+Q1.Q29_7.Freq_Sugar_Beverages
Portions of seeds (last 24 hours)	1.74568	0.00183116	5.76896	0.00089991	0.00867797	3034	~lib_size+read_conc_norm+run20201009_isala_cross_1+run20201016_isala_cross_2+run20201023_isala_cross_3+run20201030_isala_cross_4+run20201106_isala_cross_5+run20201120_isala_cross_6+run20201204_isala_cross_8+run20201211_isala_cross_9+run20210119_isala_cross_7+Q0.Leeftijd+Q2.Q11_5.Portion_24h_Seeds
Monthly sugary beverages	2.51731	0.00263273	8.32578	9.999e-05	0.00511949	3043	~lib_size+read_conc_norm+run20201009_isala_cross_1+run20201016_isala_cross_2+run20201023_isala_cross_3+run20201030_isala_cross_4+run20201106_isala_cross_5+run20201120_isala_cross_6+run20201204_isala_cross_8+run20201211_isala_cross_9+run20210119_isala_cross_7+Q0.Leeftijd+Q1.Q29_7.Monthly_Sugar_Beverages
Attempted pregnancy	8.29145	0.00867161	27.5972	9.999e-05	0.00511949	{True: 1111, False: 1932}	~lib_size+read_conc_norm+run20201009_isala_cross_1+run20201016_isala_cross_2+run20201023_isala_cross_3+run20201030_isala_cross_4+run20201106_isala_cross_5+run20201120_isala_cross_6+run20201204_isala_cross_8+run20201211_isala_cross_9+run20210119_isala_cross_7+Q0.Leeftijd+Q1.Q49.Attempted_pregnancy
Currently breastfeeding	2.9938	0.00314535	9.91066	9.999e-05	0.00511949	{False: 2962, True: 68, nan: 13}	~lib_size+read_conc_norm+run20201009_isala_cross_1+run20201016_isala_cross_2+run20201023_isala_cross_3+run20201030_isala_cross_4+run20201106_isala_cross_5+run20201120_isala_cross_6+run20201204_isala_cross_8+run20201211_isala_cross_9+run20210119_isala_cross_7+Q0.Leeftijd+Q2.Q24.Breastfeeding
Peri/Post-menopausal	1.4433	0.00150948	4.76801	0.00249975	0.0182839	{False: 2884, True: 159}	~lib_size+read_conc_norm+run20201009_isala_cross_1+run20201016_isala_cross_2+run20201023_isala_cross_3+run20201030_isala_cross_4+run20201106_isala_cross_5+run20201120_isala_cross_6+run20201204_isala_cross_8+run20201211_isala_cross_9+run20210119_isala_cross_7+Q0.Leeftijd+Q1.Q52.peri_or_menopause
Preterm birth	0.737828	0.000771657	2.43557	0.0515948	0.158183	{False: 2935, True: 108}	~lib_size+read_conc_norm+run20201009_isala_cross_1+run20201016_isala_cross_2+run20201023_isala_cross_3+run20201030_isala_cross_4+run20201106_isala_cross_5+run20201120_isala_cross_6+run20201204_isala_cross_8+run20201211_isala_cross_9+run20210119_isala_cross_7+Q0.Leeftijd+Q1.Q50.preterm_birth
Miscarriage	1.39932	0.00146348	4.6225	0.00329967	0.0208572	{False: 2707, True: 336}	~lib_size+read_conc_norm+run20201009_isala_cross_1+run20201016_isala_cross_2+run20201023_isala_cross_3+run20201030_isala_cross_4+run20201106_isala_cross_5+run20201120_isala_cross_6+run20201204_isala_cross_8+run20201211_isala_cross_9+run20210119_isala_cross_7+Q0.Leeftijd+Q1.Q50.miscarriage
Luteal phase	2.95937	0.00902447	9.65586	9.999e-05	0.00511949	{False: 591, nan: 2012, True: 440}	~lib_size+read_conc_norm+run20201009_isala_cross_1+run20201016_isala_cross_2+run20201023_isala_cross_3+run20201030_isala_cross_4+run20201106_isala_cross_5+run20201120_isala_cross_6+run20201204_isala_cross_8+run20201211_isala_cross_9+run20210119_isala_cross_7+Q0.Leeftijd+A.has_cycle.phase.luteal
Follicular phase	2.54792	0.00776977	8.30244	9.999e-05	0.00511949	{False: 835, nan: 2012, True: 196}	~lib_size+read_conc_norm+run20201009_isala_cross_1+run20201016_isala_cross_2+run20201023_isala_cross_3+run20201030_isala_cross_4+run20201106_isala_cross_5+run20201120_isala_cross_6+run20201204_isala_cross_8+run20201211_isala_cross_9+run20210119_isala_cross_7+Q0.Leeftijd+A.has_cycle.phase.follicular
Contraceptive: Hormonal contraception	0.262272	0.000274297	0.865313	0.449555	0.634083	{True: 1885, False: 1158}	~lib_size+read_conc_norm+run20201009_isala_cross_1+run20201016_isala_cross_2+run20201023_isala_cross_3+run20201030_isala_cross_4+run20201106_isala_cross_5+run20201120_isala_cross_6+run20201204_isala_cross_8+run20201211_isala_cross_9+run20210119_isala_cross_7+Q0.Leeftijd+Q2.Q25.hormonal_contraception
Hygeine: Pad (last 48 hours)	1.91464	0.00199195	6.32549	0.00049995	0.00867797	{False: 2878, True: 180}	~lib_size+read_conc_norm+run20201009_isala_cross_1+run20201016_isala_cross_2+run20201023_isala_cross_3+run20201030_isala_cross_4+run20201106_isala_cross_5+run20201120_isala_cross_6+run20201204_isala_cross_8+run20201211_isala_cross_9+run20210119_isala_cross_7+Q0.Leeftijd+Q2.Q29_48h_Maandverband
Hygeine: Pad	3.02577	0.00314795	10.0085	9.999e-05	0.00511949	{True: 1504, False: 1554}	~lib_size+read_conc_norm+run20201009_isala_cross_1+run20201016_isala_cross_2+run20201023_isala_cross_3+run20201030_isala_cross_4+run20201106_isala_cross_5+run20201120_isala_cross_6+run20201204_isala_cross_8+run20201211_isala_cross_9+run20210119_isala_cross_7+Q0.Leeftijd+Q1.Q52.8_period_hygeine_Maandverband
Hygeine: Menstrual cup	0.952491	0.000990953	3.14352	0.0227977	0.0934603	{False: 2337, True: 721}	~lib_size+read_conc_norm+run20201009_isala_cross_1+run20201016_isala_cross_2+run20201023_isala_cross_3+run20201030_isala_cross_4+run20201106_isala_cross_5+run20201120_isala_cross_6+run20201204_isala_cross_8+run20201211_isala_cross_9+run20210119_isala_cross_7+Q0.Leeftijd+Q1.Q52.8_period_hygeine_Menstruatiecup
No intercourse in last 24h	2.30261	0.00240818	7.61389	0.00019998	0.00867797	3043	~lib_size+read_conc_norm+run20201009_isala_cross_1+run20201016_isala_cross_2+run20201023_isala_cross_3+run20201030_isala_cross_4+run20201106_isala_cross_5+run20201120_isala_cross_6+run20201204_isala_cross_8+run20201211_isala_cross_9+run20210119_isala_cross_7+Q0.Leeftijd+A.IntercourseNo
Intercourse in last 24h	3.15171	0.00329622	10.4312	9.999e-05	0.00511949	3043	~lib_size+read_conc_norm+run20201009_isala_cross_1+run20201016_isala_cross_2+run20201023_isala_cross_3+run20201030_isala_cross_4+run20201106_isala_cross_5+run20201120_isala_cross_6+run20201204_isala_cross_8+run20201211_isala_cross_9+run20210119_isala_cross_7+Q0.Leeftijd+A.IntercourseYes
Relationship status: One partner	1.94943	0.00203881	6.44358	0.00029997	0.00867797	3043	~lib_size+read_conc_norm+run20201009_isala_cross_1+run20201016_isala_cross_2+run20201023_isala_cross_3+run20201030_isala_cross_4+run20201106_isala_cross_5+run20201120_isala_cross_6+run20201204_isala_cross_8+run20201211_isala_cross_9+run20210119_isala_cross_7+Q0.Leeftijd+Q1.Q3.Zo_beschrijf_je_best_mijn_huidige_relatiestatus.CLEANEDVaste_partner
Relationship status: Single	1.80154	0.00188413	5.95377	0.00059994	0.00867797	3043	~lib_size+read_conc_norm+run20201009_isala_cross_1+run20201016_isala_cross_2+run20201023_isala_cross_3+run20201030_isala_cross_4+run20201106_isala_cross_5+run20201120_isala_cross_6+run20201204_isala_cross_8+run20201211_isala_cross_9+run20210119_isala_cross_7+Q0.Leeftijd+Q1.Q3.Zo_beschrijf_je_best_mijn_huidige_relatiestatus.CLEANEDVrijgezel
Weeknight sleep: <7h	0.728585	0.00076199	2.40503	0.0536946	0.162635	3043	~lib_size+read_conc_norm+run20201009_isala_cross_1+run20201016_isala_cross_2+run20201023_isala_cross_3+run20201030_isala_cross_4+run20201106_isala_cross_5+run20201120_isala_cross_6+run20201204_isala_cross_8+run20201211_isala_cross_9+run20210119_isala_cross_7+Q0.Leeftijd+Q1.Q25_1.Hours_Sleep_weekA
Weekend sleep: 7-8.5h	0.874264	0.000914349	2.88637	0.0286971	0.104563	3043	~lib_size+read_conc_norm+run20201009_isala_cross_1+run20201016_isala_cross_2+run20201023_isala_cross_3+run20201030_isala_cross_4+run20201106_isala_cross_5+run20201120_isala_cross_6+run20201204_isala_cross_8+run20201211_isala_cross_9+run20210119_isala_cross_7+Q0.Leeftijd+Q1.Q25_2.Hours_Sleep_weekendB
Weekend sleep: >9h	1.37693	0.00144006	4.5484	0.00359964	0.0224758	3043	~lib_size+read_conc_norm+run20201009_isala_cross_1+run20201016_isala_cross_2+run20201023_isala_cross_3+run20201030_isala_cross_4+run20201106_isala_cross_5+run20201120_isala_cross_6+run20201204_isala_cross_8+run20201211_isala_cross_9+run20210119_isala_cross_7+Q0.Leeftijd+Q1.Q25_2.Hours_Sleep_weekendC
Age	14.1289	0.0147767	46.6174	0.001	0.00867797	3043	~lib_size+read_conc_norm+run20201009_isala_cross_1+run20201016_isala_cross_2+run20201023_isala_cross_3+run20201030_isala_cross_4+run20201106_isala_cross_5+run20201120_isala_cross_6+run20201204_isala_cross_8+run20201211_isala_cross_9+run20210119_isala_cross_7+Q0.Leeftijd

## Sheet: Shannon
effect	Estimate	Std. Error	t value	Pr(>|t|)	qvalue	n	formula
BMI	0.150062	0.0177654	8.44684	4.57989e-17	3.34986e-15	3041	rag_shannon ~lib_size+read_conc_norm+run20201009_isala_cross_1+run20201016_isala_cross_2+run20201023_isala_cross_3+run20201030_isala_cross_4+run20201106_isala_cross_5+run20201120_isala_cross_6+run20201204_isala_cross_8+run20201211_isala_cross_9+run20210119_isala_cross_7+Q0.Leeftijd+Q2.BMI
Has children	0.0508141	0.0452461	1.12306	0.261501	0.570963	{True: 1130, False: 1913}	rag_shannon ~lib_size+read_conc_norm+run20201009_isala_cross_1+run20201016_isala_cross_2+run20201023_isala_cross_3+run20201030_isala_cross_4+run20201106_isala_cross_5+run20201120_isala_cross_6+run20201204_isala_cross_8+run20201211_isala_cross_9+run20210119_isala_cross_7+Q0.Leeftijd+Q1.Q6.Has_children
Contraceptive: Progestogen pill	0.176196	0.111872	1.57497	0.115367	0.347311	{False: 2965, True: 78}	rag_shannon ~lib_size+read_conc_norm+run20201009_isala_cross_1+run20201016_isala_cross_2+run20201023_isala_cross_3+run20201030_isala_cross_4+run20201106_isala_cross_5+run20201120_isala_cross_6+run20201204_isala_cross_8+run20201211_isala_cross_9+run20210119_isala_cross_7+Q0.Leeftijd+Q2.Q25.Pill_progestogen
Contraceptive: Combination pill	-0.150527	0.0406364	-3.70424	0.00021581	0.00298635	{False: 2124, True: 919}	rag_shannon ~lib_size+read_conc_norm+run20201009_isala_cross_1+run20201016_isala_cross_2+run20201023_isala_cross_3+run20201030_isala_cross_4+run20201106_isala_cross_5+run20201120_isala_cross_6+run20201204_isala_cross_8+run20201211_isala_cross_9+run20210119_isala_cross_7+Q0.Leeftijd+Q2.Q25.Pill_combined
Contraceptive: Copper spiral	0.159752	0.0935249	1.70812	0.0877157	0.296599	{False: 2930, True: 113}	rag_shannon ~lib_size+read_conc_norm+run20201009_isala_cross_1+run20201016_isala_cross_2+run20201023_isala_cross_3+run20201030_isala_cross_4+run20201106_isala_cross_5+run20201120_isala_cross_6+run20201204_isala_cross_8+run20201211_isala_cross_9+run20210119_isala_cross_7+Q0.Leeftijd+Q2.Q25.Spiral_copper
Contraceptive: Hormonal spiral	0.063317	0.0442887	1.42964	0.152923	0.406687	{True: 605, False: 2438}	rag_shannon ~lib_size+read_conc_norm+run20201009_isala_cross_1+run20201016_isala_cross_2+run20201023_isala_cross_3+run20201030_isala_cross_4+run20201106_isala_cross_5+run20201120_isala_cross_6+run20201204_isala_cross_8+run20201211_isala_cross_9+run20210119_isala_cross_7+Q0.Leeftijd+Q2.Q25.Spiral_hormone
Contraceptive: Injection	0.280081	0.325374	0.860799	0.389417	0.670863	{False: 3034, True: 9}	rag_shannon ~lib_size+read_conc_norm+run20201009_isala_cross_1+run20201016_isala_cross_2+run20201023_isala_cross_3+run20201030_isala_cross_4+run20201106_isala_cross_5+run20201120_isala_cross_6+run20201204_isala_cross_8+run20201211_isala_cross_9+run20210119_isala_cross_7+Q0.Leeftijd+Q2.Q25.Prikpil
Contraceptive: Ring	-0.228763	0.0852379	-2.68381	0.00731837	0.0480385	{False: 2906, True: 137}	rag_shannon ~lib_size+read_conc_norm+run20201009_isala_cross_1+run20201016_isala_cross_2+run20201023_isala_cross_3+run20201030_isala_cross_4+run20201106_isala_cross_5+run20201120_isala_cross_6+run20201204_isala_cross_8+run20201211_isala_cross_9+run20210119_isala_cross_7+Q0.Leeftijd+Q2.Q25.Ring
Contraceptive: Implant	0.475259	0.203757	2.33249	0.0197403	0.10007	{False: 3020, True: 23}	rag_shannon ~lib_size+read_conc_norm+run20201009_isala_cross_1+run20201016_isala_cross_2+run20201023_isala_cross_3+run20201030_isala_cross_4+run20201106_isala_cross_5+run20201120_isala_cross_6+run20201204_isala_cross_8+run20201211_isala_cross_9+run20210119_isala_cross_7+Q0.Leeftijd+Q2.Q25.Implant
Contraceptive: Plaster	-0.0606534	0.345163	-0.175724	0.860522	0.981159	{False: 3035, True: 8}	rag_shannon ~lib_size+read_conc_norm+run20201009_isala_cross_1+run20201016_isala_cross_2+run20201023_isala_cross_3+run20201030_isala_cross_4+run20201106_isala_cross_5+run20201120_isala_cross_6+run20201204_isala_cross_8+run20201211_isala_cross_9+run20210119_isala_cross_7+Q0.Leeftijd+Q2.Q25.Plaster
Contraceptive: Condom	0.000536025	0.0526586	0.0101793	0.991879	0.998009	{False: 2643, True: 400}	rag_shannon ~lib_size+read_conc_norm+run20201009_isala_cross_1+run20201016_isala_cross_2+run20201023_isala_cross_3+run20201030_isala_cross_4+run20201106_isala_cross_5+run20201120_isala_cross_6+run20201204_isala_cross_8+run20201211_isala_cross_9+run20210119_isala_cross_7+Q0.Leeftijd+Q2.Q25.Condom
Contraceptive: Cup	0.497265	0.689171	0.721542	0.470632	0.711209	{False: 3041, True: 2}	rag_shannon ~lib_size+read_conc_norm+run20201009_isala_cross_1+run20201016_isala_cross_2+run20201023_isala_cross_3+run20201030_isala_cross_4+run20201106_isala_cross_5+run20201120_isala_cross_6+run20201204_isala_cross_8+run20201211_isala_cross_9+run20210119_isala_cross_7+Q0.Leeftijd+Q2.Q25.Cup
Contraceptive: Morning after pill	0.177275	0.325425	0.54475	0.585965	0.785378	{False: 3034, True: 9}	rag_shannon ~lib_size+read_conc_norm+run20201009_isala_cross_1+run20201016_isala_cross_2+run20201023_isala_cross_3+run20201030_isala_cross_4+run20201106_isala_cross_5+run20201120_isala_cross_6+run20201204_isala_cross_8+run20201211_isala_cross_9+run20210119_isala_cross_7+Q0.Leeftijd+Q2.Q25.Morning_after
Contraceptive: Periodic celibacy	0.302447	0.131282	2.3038	0.0213014	0.105886	{False: 2987, True: 56}	rag_shannon ~lib_size+read_conc_norm+run20201009_isala_cross_1+run20201016_isala_cross_2+run20201023_isala_cross_3+run20201030_isala_cross_4+run20201106_isala_cross_5+run20201120_isala_cross_6+run20201204_isala_cross_8+run20201211_isala_cross_9+run20210119_isala_cross_7+Q0.Leeftijd+Q2.Q25.Periodic_celibacy
Contraceptive: Pullout method	0.00160474	0.0847889	0.0189263	0.984901	0.998009	{False: 2904, True: 139}	rag_shannon ~lib_size+read_conc_norm+run20201009_isala_cross_1+run20201016_isala_cross_2+run20201023_isala_cross_3+run20201030_isala_cross_4+run20201106_isala_cross_5+run20201120_isala_cross_6+run20201204_isala_cross_8+run20201211_isala_cross_9+run20210119_isala_cross_7+Q0.Leeftijd+Q2.Q25.Pullout
Contraceptive: Sterlized	0.23403	0.177335	1.3197	0.187033	0.458187	{False: 3012, True: 31}	rag_shannon ~lib_size+read_conc_norm+run20201009_isala_cross_1+run20201016_isala_cross_2+run20201023_isala_cross_3+run20201030_isala_cross_4+run20201106_isala_cross_5+run20201120_isala_cross_6+run20201204_isala_cross_8+run20201211_isala_cross_9+run20210119_isala_cross_7+Q0.Leeftijd+Q2.Q25.Sterilized
Contraceptive: Partner sterlized	0.00339871	0.143677	0.0236552	0.981129	0.998009	{False: 2996, True: 47}	rag_shannon ~lib_size+read_conc_norm+run20201009_isala_cross_1+run20201016_isala_cross_2+run20201023_isala_cross_3+run20201030_isala_cross_4+run20201106_isala_cross_5+run20201120_isala_cross_6+run20201204_isala_cross_8+run20201211_isala_cross_9+run20210119_isala_cross_7+Q0.Leeftijd+Q2.Q25.Partner_sterilized
Born with vaginal birth	0.00687039	0.0572039	0.120104	0.904409	0.983925	{True: 2714, False: 329}	rag_shannon ~lib_size+read_conc_norm+run20201009_isala_cross_1+run20201016_isala_cross_2+run20201023_isala_cross_3+run20201030_isala_cross_4+run20201106_isala_cross_5+run20201120_isala_cross_6+run20201204_isala_cross_8+run20201211_isala_cross_9+run20210119_isala_cross_7+Q0.Leeftijd+Q1.Q32.Born_vaginal
Born with caesarean section	-0.052583	0.0602096	-0.873332	0.382552	0.663954	{False: 2749, True: 294}	rag_shannon ~lib_size+read_conc_norm+run20201009_isala_cross_1+run20201016_isala_cross_2+run20201023_isala_cross_3+run20201030_isala_cross_4+run20201106_isala_cross_5+run20201120_isala_cross_6+run20201204_isala_cross_8+run20201211_isala_cross_9+run20210119_isala_cross_7+Q0.Leeftijd+Q1.Q32.Born_csect
Frequency of probiotic dairy	0.00925943	0.0176901	0.523423	0.600718	0.7927	3043	rag_shannon ~lib_size+read_conc_norm+run20201009_isala_cross_1+run20201016_isala_cross_2+run20201023_isala_cross_3+run20201030_isala_cross_4+run20201106_isala_cross_5+run20201120_isala_cross_6+run20201204_isala_cross_8+run20201211_isala_cross_9+run20210119_isala_cross_7+Q0.Leeftijd+Q1.Q28_1.Freq_Dairy_Probio
Frequency of probiotic yoghurt	-0.0122331	0.0176756	-0.692087	0.488935	0.723511	3043	rag_shannon ~lib_size+read_conc_norm+run20201009_isala_cross_1+run20201016_isala_cross_2+run20201023_isala_cross_3+run20201030_isala_cross_4+run20201106_isala_cross_5+run20201120_isala_cross_6+run20201204_isala_cross_8+run20201211_isala_cross_9+run20210119_isala_cross_7+Q0.Leeftijd+Q1.Q28_2.Freq_Yoghurt_Probio
Frequency of probiotic capsules	-0.0012243	0.0177038	-0.0691544	0.944871	0.986805	3043	rag_shannon ~lib_size+read_conc_norm+run20201009_isala_cross_1+run20201016_isala_cross_2+run20201023_isala_cross_3+run20201030_isala_cross_4+run20201106_isala_cross_5+run20201120_isala_cross_6+run20201204_isala_cross_8+run20201211_isala_cross_9+run20210119_isala_cross_7+Q0.Leeftijd+Q1.Q28_3.Freq_Capsules_Probio
Frequency dairy	0.00116208	0.0177011	0.0656498	0.947661	0.986805	3043	rag_shannon ~lib_size+read_conc_norm+run20201009_isala_cross_1+run20201016_isala_cross_2+run20201023_isala_cross_3+run20201030_isala_cross_4+run20201106_isala_cross_5+run20201120_isala_cross_6+run20201204_isala_cross_8+run20201211_isala_cross_9+run20210119_isala_cross_7+Q0.Leeftijd+Q1.Q29_1.Freq_Dairy
Frequency of fermented food	0.00567425	0.0177068	0.320455	0.748646	0.904923	3043	rag_shannon ~lib_size+read_conc_norm+run20201009_isala_cross_1+run20201016_isala_cross_2+run20201023_isala_cross_3+run20201030_isala_cross_4+run20201106_isala_cross_5+run20201120_isala_cross_6+run20201204_isala_cross_8+run20201211_isala_cross_9+run20210119_isala_cross_7+Q0.Leeftijd+Q1.Q29_2.Freq_FermFood
Frequency of alcohol intake	-0.0436611	0.0177195	-2.46401	0.0137943	0.077612	3043	rag_shannon ~lib_size+read_conc_norm+run20201009_isala_cross_1+run20201016_isala_cross_2+run20201023_isala_cross_3+run20201030_isala_cross_4+run20201106_isala_cross_5+run20201120_isala_cross_6+run20201204_isala_cross_8+run20201211_isala_cross_9+run20210119_isala_cross_7+Q0.Leeftijd+Q1.Q29_3.Freq_EtOH
Frequency of meat	0.0248234	0.0177229	1.40064	0.161424	0.419538	3043	rag_shannon ~lib_size+read_conc_norm+run20201009_isala_cross_1+run20201016_isala_cross_2+run20201023_isala_cross_3+run20201030_isala_cross_4+run20201106_isala_cross_5+run20201120_isala_cross_6+run20201204_isala_cross_8+run20201211_isala_cross_9+run20210119_isala_cross_7+Q0.Leeftijd+Q1.Q29_4.Freq_Meat
Frequency of animal products	-0.00246381	0.0176776	-0.139374	0.889164	0.983925	3043	rag_shannon ~lib_size+read_conc_norm+run20201009_isala_cross_1+run20201016_isala_cross_2+run20201023_isala_cross_3+run20201030_isala_cross_4+run20201106_isala_cross_5+run20201120_isala_cross_6+run20201204_isala_cross_8+run20201211_isala_cross_9+run20210119_isala_cross_7+Q0.Leeftijd+Q1.Q29_5.Freq_Animal_Prod
Frequency of fish	0.0208491	0.0178338	1.16908	0.242464	0.542103	3043	rag_shannon ~lib_size+read_conc_norm+run20201009_isala_cross_1+run20201016_isala_cross_2+run20201023_isala_cross_3+run20201030_isala_cross_4+run20201106_isala_cross_5+run20201120_isala_cross_6+run20201204_isala_cross_8+run20201211_isala_cross_9+run20210119_isala_cross_7+Q0.Leeftijd+Q1.Q29_6.Freq_Fish
Frequency of sugary beverages	0.0307025	0.0180405	1.70187	0.0888826	0.297437	3043	rag_shannon ~lib_size+read_conc_norm+run20201009_isala_cross_1+run20201016_isala_cross_2+run20201023_isala_cross_3+run20201030_isala_cross_4+run20201106_isala_cross_5+run20201120_isala_cross_6+run20201204_isala_cross_8+run20201211_isala_cross_9+run20210119_isala_cross_7+Q0.Leeftijd+Q1.Q29_7.Freq_Sugar_Beverages
Frequency of light beverages	0.021724	0.0176736	1.22917	0.219102	0.514487	3043	rag_shannon ~lib_size+read_conc_norm+run20201009_isala_cross_1+run20201016_isala_cross_2+run20201023_isala_cross_3+run20201030_isala_cross_4+run20201106_isala_cross_5+run20201120_isala_cross_6+run20201204_isala_cross_8+run20201211_isala_cross_9+run20210119_isala_cross_7+Q0.Leeftijd+Q1.Q29_8.Freq_Light_Beverages
Frequency of fruit	-0.00724765	0.0177025	-0.409415	0.682264	0.843767	3043	rag_shannon ~lib_size+read_conc_norm+run20201009_isala_cross_1+run20201016_isala_cross_2+run20201023_isala_cross_3+run20201030_isala_cross_4+run20201106_isala_cross_5+run20201120_isala_cross_6+run20201204_isala_cross_8+run20201211_isala_cross_9+run20210119_isala_cross_7+Q0.Leeftijd+Q1.Q29_9.Freq_Fruit
Frequency vegetables	-0.0148097	0.0177297	-0.835308	0.40361	0.682008	3043	rag_shannon ~lib_size+read_conc_norm+run20201009_isala_cross_1+run20201016_isala_cross_2+run20201023_isala_cross_3+run20201030_isala_cross_4+run20201106_isala_cross_5+run20201120_isala_cross_6+run20201204_isala_cross_8+run20201211_isala_cross_9+run20210119_isala_cross_7+Q0.Leeftijd+Q1.Q29_10.Freq_Vegetables
Intake of probiotic dairy (last 24 hours)	-0.23174	0.119282	-1.94278	0.0521349	0.199202	{False: 2970, True: 68, nan: 5}	rag_shannon ~lib_size+read_conc_norm+run20201009_isala_cross_1+run20201016_isala_cross_2+run20201023_isala_cross_3+run20201030_isala_cross_4+run20201106_isala_cross_5+run20201120_isala_cross_6+run20201204_isala_cross_8+run20201211_isala_cross_9+run20210119_isala_cross_7+Q0.Leeftijd+Q2.Q8_1.Intake_Probio_Dairy_24h
Intake of probiotic yoghurt (last 24 hours)	0.0194201	0.0545293	0.35614	0.72176	0.87777	{False: 2677, True: 361, nan: 5}	rag_shannon ~lib_size+read_conc_norm+run20201009_isala_cross_1+run20201016_isala_cross_2+run20201023_isala_cross_3+run20201030_isala_cross_4+run20201106_isala_cross_5+run20201120_isala_cross_6+run20201204_isala_cross_8+run20201211_isala_cross_9+run20210119_isala_cross_7+Q0.Leeftijd+Q2.Q8_4.Intake_Probio_Yoghurt_24h
Intake of probiotic capsules (last 24 hours)	-0.20271	0.0999321	-2.02848	0.042599	0.173161	{False: 2940, True: 98, nan: 5}	rag_shannon ~lib_size+read_conc_norm+run20201009_isala_cross_1+run20201016_isala_cross_2+run20201023_isala_cross_3+run20201030_isala_cross_4+run20201106_isala_cross_5+run20201120_isala_cross_6+run20201204_isala_cross_8+run20201211_isala_cross_9+run20210119_isala_cross_7+Q0.Leeftijd+Q2.Q8_5.Intake_Probio_Capsules_24h
No intake of probiotics (last 24 hours)	0.0492656	0.0479504	1.02743	0.304301	0.628233	{True: 2548, False: 491, nan: 4}	rag_shannon ~lib_size+read_conc_norm+run20201009_isala_cross_1+run20201016_isala_cross_2+run20201023_isala_cross_3+run20201030_isala_cross_4+run20201106_isala_cross_5+run20201120_isala_cross_6+run20201204_isala_cross_8+run20201211_isala_cross_9+run20210119_isala_cross_7+Q0.Leeftijd+Q2.Q8_6.No_Intake_Probio
Portions of dairy (last 24 hours)	-0.00612622	0.0176497	-0.347101	0.72854	0.883915	3038	rag_shannon ~lib_size+read_conc_norm+run20201009_isala_cross_1+run20201016_isala_cross_2+run20201023_isala_cross_3+run20201030_isala_cross_4+run20201106_isala_cross_5+run20201120_isala_cross_6+run20201204_isala_cross_8+run20201211_isala_cross_9+run20210119_isala_cross_7+Q0.Leeftijd+Q2.Q10_1.Portion_24h_Dairy
Portions of fermented foods (last 24 hours)	0.0110384	0.0176719	0.624632	0.53226	0.764651	3038	rag_shannon ~lib_size+read_conc_norm+run20201009_isala_cross_1+run20201016_isala_cross_2+run20201023_isala_cross_3+run20201030_isala_cross_4+run20201106_isala_cross_5+run20201120_isala_cross_6+run20201204_isala_cross_8+run20201211_isala_cross_9+run20210119_isala_cross_7+Q0.Leeftijd+Q2.Q10_2.Portion_24h_Fermented_Food
Portions of alcohol (last 24 hours)	-0.00317567	0.017786	-0.178549	0.858304	0.981159	3038	rag_shannon ~lib_size+read_conc_norm+run20201009_isala_cross_1+run20201016_isala_cross_2+run20201023_isala_cross_3+run20201030_isala_cross_4+run20201106_isala_cross_5+run20201120_isala_cross_6+run20201204_isala_cross_8+run20201211_isala_cross_9+run20210119_isala_cross_7+Q0.Leeftijd+Q2.Q10_3.Portion_24h_Alcohol
Portions of meat (last 24 hours)	0.0298369	0.0176677	1.68878	0.0913646	0.301798	3038	rag_shannon ~lib_size+read_conc_norm+run20201009_isala_cross_1+run20201016_isala_cross_2+run20201023_isala_cross_3+run20201030_isala_cross_4+run20201106_isala_cross_5+run20201120_isala_cross_6+run20201204_isala_cross_8+run20201211_isala_cross_9+run20210119_isala_cross_7+Q0.Leeftijd+Q2.Q10_4.Portion_24h_Meat
Portions of fish (last 24 hours)	0.000179362	0.0176689	0.0101512	0.991901	0.998009	3038	rag_shannon ~lib_size+read_conc_norm+run20201009_isala_cross_1+run20201016_isala_cross_2+run20201023_isala_cross_3+run20201030_isala_cross_4+run20201106_isala_cross_5+run20201120_isala_cross_6+run20201204_isala_cross_8+run20201211_isala_cross_9+run20210119_isala_cross_7+Q0.Leeftijd+Q2.Q10_5.Portion_24h_Fish
Portions of coffee (last 24 hours)	-0.0165536	0.0183378	-0.902704	0.366755	0.663954	3038	rag_shannon ~lib_size+read_conc_norm+run20201009_isala_cross_1+run20201016_isala_cross_2+run20201023_isala_cross_3+run20201030_isala_cross_4+run20201106_isala_cross_5+run20201120_isala_cross_6+run20201204_isala_cross_8+run20201211_isala_cross_9+run20210119_isala_cross_7+Q0.Leeftijd+Q2.Q10_6.Portion_24h_Coffee
Portions of sugary beverages (last 24 hours)	0.026502	0.017818	1.48737	0.137021	0.387594	3038	rag_shannon ~lib_size+read_conc_norm+run20201009_isala_cross_1+run20201016_isala_cross_2+run20201023_isala_cross_3+run20201030_isala_cross_4+run20201106_isala_cross_5+run20201120_isala_cross_6+run20201204_isala_cross_8+run20201211_isala_cross_9+run20210119_isala_cross_7+Q0.Leeftijd+Q2.Q10_7.Portion_24h_Sugar_Beverages
Portions of light beverages (last 24 hours)	0.0568852	0.0176566	3.22175	0.00128763	0.0131853	3038	rag_shannon ~lib_size+read_conc_norm+run20201009_isala_cross_1+run20201016_isala_cross_2+run20201023_isala_cross_3+run20201030_isala_cross_4+run20201106_isala_cross_5+run20201120_isala_cross_6+run20201204_isala_cross_8+run20201211_isala_cross_9+run20210119_isala_cross_7+Q0.Leeftijd+Q2.Q10_8.Portion_24h_Light_Beverages
Portions of fruit fibers (last 24 hours)	0.00278953	0.0177657	0.157018	0.875241	0.983925	3038	rag_shannon ~lib_size+read_conc_norm+run20201009_isala_cross_1+run20201016_isala_cross_2+run20201023_isala_cross_3+run20201030_isala_cross_4+run20201106_isala_cross_5+run20201120_isala_cross_6+run20201204_isala_cross_8+run20201211_isala_cross_9+run20210119_isala_cross_7+Q0.Leeftijd+Q2.Q10_9.Portion_24h_Fruit_Fibers
Portions of vegetable fibers (last 24 hours)	0.0135684	0.017668	0.767964	0.442568	0.706061	3038	rag_shannon ~lib_size+read_conc_norm+run20201009_isala_cross_1+run20201016_isala_cross_2+run20201023_isala_cross_3+run20201030_isala_cross_4+run20201106_isala_cross_5+run20201120_isala_cross_6+run20201204_isala_cross_8+run20201211_isala_cross_9+run20210119_isala_cross_7+Q0.Leeftijd+Q2.Q10_10.Portion_24h_Vegetable_Fibers
Portions of cold pasta (last 24 hours)	0.0282598	0.0176912	1.59739	0.110284	0.342214	3034	rag_shannon ~lib_size+read_conc_norm+run20201009_isala_cross_1+run20201016_isala_cross_2+run20201023_isala_cross_3+run20201030_isala_cross_4+run20201106_isala_cross_5+run20201120_isala_cross_6+run20201204_isala_cross_8+run20201211_isala_cross_9+run20210119_isala_cross_7+Q0.Leeftijd+Q2.Q11_1.Portion_24h_Cold_Pasta
Portions of whole grain bread (last 24 hours)	0.00318738	0.0176734	0.180349	0.85689	0.981159	3034	rag_shannon ~lib_size+read_conc_norm+run20201009_isala_cross_1+run20201016_isala_cross_2+run20201023_isala_cross_3+run20201030_isala_cross_4+run20201106_isala_cross_5+run20201120_isala_cross_6+run20201204_isala_cross_8+run20201211_isala_cross_9+run20210119_isala_cross_7+Q0.Leeftijd+Q2.Q11_2.Portion_24h_Whole_Grain_Bread
Portions of sourdough (last 24 hours)	0.00690246	0.0176682	0.390671	0.696068	0.852789	3034	rag_shannon ~lib_size+read_conc_norm+run20201009_isala_cross_1+run20201016_isala_cross_2+run20201023_isala_cross_3+run20201030_isala_cross_4+run20201106_isala_cross_5+run20201120_isala_cross_6+run20201204_isala_cross_8+run20201211_isala_cross_9+run20210119_isala_cross_7+Q0.Leeftijd+Q2.Q11_3.Portion_24h_Sourdough
Portions of quinoa (last 24 hours)	0.000251482	0.0176887	0.0142171	0.988658	0.998009	3034	rag_shannon ~lib_size+read_conc_norm+run20201009_isala_cross_1+run20201016_isala_cross_2+run20201023_isala_cross_3+run20201030_isala_cross_4+run20201106_isala_cross_5+run20201120_isala_cross_6+run20201204_isala_cross_8+run20201211_isala_cross_9+run20210119_isala_cross_7+Q0.Leeftijd+Q2.Q11_4.Portion_24h_Quinoa
Portions of seeds (last 24 hours)	0.000206656	0.0177591	0.0116366	0.990716	0.998009	3034	rag_shannon ~lib_size+read_conc_norm+run20201009_isala_cross_1+run20201016_isala_cross_2+run20201023_isala_cross_3+run20201030_isala_cross_4+run20201106_isala_cross_5+run20201120_isala_cross_6+run20201204_isala_cross_8+run20201211_isala_cross_9+run20210119_isala_cross_7+Q0.Leeftijd+Q2.Q11_5.Portion_24h_Seeds
Portions of nuts (last 24 hours)	0.0155058	0.0177213	0.874982	0.381653	0.663954	3034	rag_shannon ~lib_size+read_conc_norm+run20201009_isala_cross_1+run20201016_isala_cross_2+run20201023_isala_cross_3+run20201030_isala_cross_4+run20201106_isala_cross_5+run20201120_isala_cross_6+run20201204_isala_cross_8+run20201211_isala_cross_9+run20210119_isala_cross_7+Q0.Leeftijd+Q2.Q11_6.Portion_24h_Nuts
Portions of chocolate (last 24 hours)	-0.0146354	0.017737	-0.825135	0.40936	0.689449	3034	rag_shannon ~lib_size+read_conc_norm+run20201009_isala_cross_1+run20201016_isala_cross_2+run20201023_isala_cross_3+run20201030_isala_cross_4+run20201106_isala_cross_5+run20201120_isala_cross_6+run20201204_isala_cross_8+run20201211_isala_cross_9+run20210119_isala_cross_7+Q0.Leeftijd+Q2.Q11_7.Portion_24h_Chocolat
Portions of candy (last 24 hours)	-0.00326218	0.0176766	-0.184548	0.853596	0.981159	3034	rag_shannon ~lib_size+read_conc_norm+run20201009_isala_cross_1+run20201016_isala_cross_2+run20201023_isala_cross_3+run20201030_isala_cross_4+run20201106_isala_cross_5+run20201120_isala_cross_6+run20201204_isala_cross_8+run20201211_isala_cross_9+run20210119_isala_cross_7+Q0.Leeftijd+Q2.Q11_8.Portion_24h_Candy
Portions of savoury snacks (last 24 hours)	0.0323253	0.0177397	1.8222	0.0685237	0.248824	3034	rag_shannon ~lib_size+read_conc_norm+run20201009_isala_cross_1+run20201016_isala_cross_2+run20201023_isala_cross_3+run20201030_isala_cross_4+run20201106_isala_cross_5+run20201120_isala_cross_6+run20201204_isala_cross_8+run20201211_isala_cross_9+run20210119_isala_cross_7+Q0.Leeftijd+Q2.Q11_9.Portion_24h_Salty_Snacks
Intake of probiotics	-0.0269016	0.035675	-0.754074	0.450864	0.706061	{True: 1682, False: 1350, nan: 11}	rag_shannon ~lib_size+read_conc_norm+run20201009_isala_cross_1+run20201016_isala_cross_2+run20201023_isala_cross_3+run20201030_isala_cross_4+run20201106_isala_cross_5+run20201120_isala_cross_6+run20201204_isala_cross_8+run20201211_isala_cross_9+run20210119_isala_cross_7+Q0.Leeftijd+Q2.Q13.Intake_probiotics
Monthly probiotic dairy	8.94935e-05	0.0176674	0.00506546	0.995959	0.999719	3043	rag_shannon ~lib_size+read_conc_norm+run20201009_isala_cross_1+run20201016_isala_cross_2+run20201023_isala_cross_3+run20201030_isala_cross_4+run20201106_isala_cross_5+run20201120_isala_cross_6+run20201204_isala_cross_8+run20201211_isala_cross_9+run20210119_isala_cross_7+Q0.Leeftijd+Q1.Q28_1.Monthly_Dairy_Probio
Monthly probiotic yoghurt	-0.00987176	0.0177048	-0.557575	0.577176	0.776679	3043	rag_shannon ~lib_size+read_conc_norm+run20201009_isala_cross_1+run20201016_isala_cross_2+run20201023_isala_cross_3+run20201030_isala_cross_4+run20201106_isala_cross_5+run20201120_isala_cross_6+run20201204_isala_cross_8+run20201211_isala_cross_9+run20210119_isala_cross_7+Q0.Leeftijd+Q1.Q28_2.Monthly_Yoghurt_Probio
Monthly probiotic capsules	0.00233924	0.017697	0.132183	0.894848	0.983925	3043	rag_shannon ~lib_size+read_conc_norm+run20201009_isala_cross_1+run20201016_isala_cross_2+run20201023_isala_cross_3+run20201030_isala_cross_4+run20201106_isala_cross_5+run20201120_isala_cross_6+run20201204_isala_cross_8+run20201211_isala_cross_9+run20210119_isala_cross_7+Q0.Leeftijd+Q1.Q28_3.Monthly_Capsules_Probio
Monthly dairy	-0.0105667	0.0177121	-0.59658	0.550832	0.768567	3043	rag_shannon ~lib_size+read_conc_norm+run20201009_isala_cross_1+run20201016_isala_cross_2+run20201023_isala_cross_3+run20201030_isala_cross_4+run20201106_isala_cross_5+run20201120_isala_cross_6+run20201204_isala_cross_8+run20201211_isala_cross_9+run20210119_isala_cross_7+Q0.Leeftijd+Q1.Q29_1.Monthly_Dairy
Monthly fermented food	0.010251	0.0176877	0.579554	0.562259	0.771787	3043	rag_shannon ~lib_size+read_conc_norm+run20201009_isala_cross_1+run20201016_isala_cross_2+run20201023_isala_cross_3+run20201030_isala_cross_4+run20201106_isala_cross_5+run20201120_isala_cross_6+run20201204_isala_cross_8+run20201211_isala_cross_9+run20210119_isala_cross_7+Q0.Leeftijd+Q1.Q29_2.Monthly_FermFood
Monthly alcohol intake	-0.0111013	0.0179353	-0.618966	0.535985	0.764651	3043	rag_shannon ~lib_size+read_conc_norm+run20201009_isala_cross_1+run20201016_isala_cross_2+run20201023_isala_cross_3+run20201030_isala_cross_4+run20201106_isala_cross_5+run20201120_isala_cross_6+run20201204_isala_cross_8+run20201211_isala_cross_9+run20210119_isala_cross_7+Q0.Leeftijd+Q1.Q29_3.Monthly_EtOH
Monthly meat	0.0177495	0.0176862	1.00358	0.315659	0.63629	3043	rag_shannon ~lib_size+read_conc_norm+run20201009_isala_cross_1+run20201016_isala_cross_2+run20201023_isala_cross_3+run20201030_isala_cross_4+run20201106_isala_cross_5+run20201120_isala_cross_6+run20201204_isala_cross_8+run20201211_isala_cross_9+run20210119_isala_cross_7+Q0.Leeftijd+Q1.Q29_4.Monthly_Meat
Monthly animal products	0.0160726	0.0176628	0.909967	0.362912	0.663954	3043	rag_shannon ~lib_size+read_conc_norm+run20201009_isala_cross_1+run20201016_isala_cross_2+run20201023_isala_cross_3+run20201030_isala_cross_4+run20201106_isala_cross_5+run20201120_isala_cross_6+run20201204_isala_cross_8+run20201211_isala_cross_9+run20210119_isala_cross_7+Q0.Leeftijd+Q1.Q29_5.Monthly_Animal_Prod
Monthly fish	0.0286352	0.0177737	1.61109	0.107263	0.334871	3043	rag_shannon ~lib_size+read_conc_norm+run20201009_isala_cross_1+run20201016_isala_cross_2+run20201023_isala_cross_3+run20201030_isala_cross_4+run20201106_isala_cross_5+run20201120_isala_cross_6+run20201204_isala_cross_8+run20201211_isala_cross_9+run20210119_isala_cross_7+Q0.Leeftijd+Q1.Q29_6.Monthly_Fish
Monthly sugary beverages	0.0245027	0.0177439	1.38091	0.167409	0.430721	3043	rag_shannon ~lib_size+read_conc_norm+run20201009_isala_cross_1+run20201016_isala_cross_2+run20201023_isala_cross_3+run20201030_isala_cross_4+run20201106_isala_cross_5+run20201120_isala_cross_6+run20201204_isala_cross_8+run20201211_isala_cross_9+run20210119_isala_cross_7+Q0.Leeftijd+Q1.Q29_7.Monthly_Sugar_Beverages
Monthly light beverages	0.0103692	0.0176965	0.585945	0.557956	0.770003	3043	rag_shannon ~lib_size+read_conc_norm+run20201009_isala_cross_1+run20201016_isala_cross_2+run20201023_isala_cross_3+run20201030_isala_cross_4+run20201106_isala_cross_5+run20201120_isala_cross_6+run20201204_isala_cross_8+run20201211_isala_cross_9+run20210119_isala_cross_7+Q0.Leeftijd+Q1.Q29_8.Monthly_Light_Beverages
Monthly fruit	0.00381664	0.0177069	0.215545	0.829357	0.970691	3043	rag_shannon ~lib_size+read_conc_norm+run20201009_isala_cross_1+run20201016_isala_cross_2+run20201023_isala_cross_3+run20201030_isala_cross_4+run20201106_isala_cross_5+run20201120_isala_cross_6+run20201204_isala_cross_8+run20201211_isala_cross_9+run20210119_isala_cross_7+Q0.Leeftijd+Q1.Q29_9.Monthly_Fruit
Monthly vegetables	-0.00490367	0.0177428	-0.276376	0.782279	0.931457	3043	rag_shannon ~lib_size+read_conc_norm+run20201009_isala_cross_1+run20201016_isala_cross_2+run20201023_isala_cross_3+run20201030_isala_cross_4+run20201106_isala_cross_5+run20201120_isala_cross_6+run20201204_isala_cross_8+run20201211_isala_cross_9+run20210119_isala_cross_7+Q0.Leeftijd+Q1.Q29_10.Monthly_Vegetables
Monthly use of vaginal probiotics (last 3 months)	0.0260781	0.0176644	1.47631	0.139964	0.39138	3043	rag_shannon ~lib_size+read_conc_norm+run20201009_isala_cross_1+run20201016_isala_cross_2+run20201023_isala_cross_3+run20201030_isala_cross_4+run20201106_isala_cross_5+run20201120_isala_cross_6+run20201204_isala_cross_8+run20201211_isala_cross_9+run20210119_isala_cross_7+Q0.Leeftijd+Q1.Q56_3.Monthly_Vaginal_Probio_3Months
Redness	-0.0641179	0.0915198	-0.70059	0.483613	0.720121	{False: 2925, True: 118}	rag_shannon ~lib_size+read_conc_norm+run20201009_isala_cross_1+run20201016_isala_cross_2+run20201023_isala_cross_3+run20201030_isala_cross_4+run20201106_isala_cross_5+run20201120_isala_cross_6+run20201204_isala_cross_8+run20201211_isala_cross_9+run20210119_isala_cross_7+Q0.Leeftijd+Q2.30.Redness
Swelling	0.0262722	0.117888	0.222858	0.823661	0.967235	{False: 2973, True: 70}	rag_shannon ~lib_size+read_conc_norm+run20201009_isala_cross_1+run20201016_isala_cross_2+run20201023_isala_cross_3+run20201030_isala_cross_4+run20201106_isala_cross_5+run20201120_isala_cross_6+run20201204_isala_cross_8+run20201211_isala_cross_9+run20210119_isala_cross_7+Q0.Leeftijd+Q2.30.Swelling
General pain	0.0839274	0.111859	0.750298	0.453134	0.706061	{False: 2965, True: 78}	rag_shannon ~lib_size+read_conc_norm+run20201009_isala_cross_1+run20201016_isala_cross_2+run20201023_isala_cross_3+run20201030_isala_cross_4+run20201106_isala_cross_5+run20201120_isala_cross_6+run20201204_isala_cross_8+run20201211_isala_cross_9+run20210119_isala_cross_7+Q0.Leeftijd+Q2.30.General_pain
Itching	-0.0329728	0.0517309	-0.63739	0.523919	0.757758	{True: 411, False: 2632}	rag_shannon ~lib_size+read_conc_norm+run20201009_isala_cross_1+run20201016_isala_cross_2+run20201023_isala_cross_3+run20201030_isala_cross_4+run20201106_isala_cross_5+run20201120_isala_cross_6+run20201204_isala_cross_8+run20201211_isala_cross_9+run20210119_isala_cross_7+Q0.Leeftijd+Q2.30.Iching
Burning feeling	-0.0539312	0.0757315	-0.712136	0.476435	0.715352	{False: 2867, True: 176}	rag_shannon ~lib_size+read_conc_norm+run20201009_isala_cross_1+run20201016_isala_cross_2+run20201023_isala_cross_3+run20201030_isala_cross_4+run20201106_isala_cross_5+run20201120_isala_cross_6+run20201204_isala_cross_8+run20201211_isala_cross_9+run20210119_isala_cross_7+Q0.Leeftijd+Q2.30.Burning_feeling
Increased vaginal discharge	0.179961	0.0676958	2.65837	0.00789314	0.0511556	{False: 2819, True: 224}	rag_shannon ~lib_size+read_conc_norm+run20201009_isala_cross_1+run20201016_isala_cross_2+run20201023_isala_cross_3+run20201030_isala_cross_4+run20201106_isala_cross_5+run20201120_isala_cross_6+run20201204_isala_cross_8+run20201211_isala_cross_9+run20210119_isala_cross_7+Q0.Leeftijd+Q2.30.Increased_vaginal_discharge
Change in vaginal discharge color or smell	0.247814	0.0826453	2.99853	0.00273492	0.0218111	{False: 2897, True: 146}	rag_shannon ~lib_size+read_conc_norm+run20201009_isala_cross_1+run20201016_isala_cross_2+run20201023_isala_cross_3+run20201030_isala_cross_4+run20201106_isala_cross_5+run20201120_isala_cross_6+run20201204_isala_cross_8+run20201211_isala_cross_9+run20210119_isala_cross_7+Q0.Leeftijd+Q2.30.Change_vaginal_discharge_color_smell
Pain during sex	-0.00235984	0.0743896	-0.0317228	0.974695	0.998009	{False: 2858, True: 185}	rag_shannon ~lib_size+read_conc_norm+run20201009_isala_cross_1+run20201016_isala_cross_2+run20201023_isala_cross_3+run20201030_isala_cross_4+run20201106_isala_cross_5+run20201120_isala_cross_6+run20201204_isala_cross_8+run20201211_isala_cross_9+run20210119_isala_cross_7+Q0.Leeftijd+Q2.30.Pain_during_sex
UTI	-0.0184143	0.143268	-0.12853	0.897738	0.983925	{False: 2996, True: 47}	rag_shannon ~lib_size+read_conc_norm+run20201009_isala_cross_1+run20201016_isala_cross_2+run20201023_isala_cross_3+run20201030_isala_cross_4+run20201106_isala_cross_5+run20201120_isala_cross_6+run20201204_isala_cross_8+run20201211_isala_cross_9+run20210119_isala_cross_7+Q0.Leeftijd+Q2.30.Urinary_infection
Other vaginal health complaints	0.0845042	0.0955995	0.883939	0.376799	0.663954	{False: 2935, True: 108}	rag_shannon ~lib_size+read_conc_norm+run20201009_isala_cross_1+run20201016_isala_cross_2+run20201023_isala_cross_3+run20201030_isala_cross_4+run20201106_isala_cross_5+run20201120_isala_cross_6+run20201204_isala_cross_8+run20201211_isala_cross_9+run20210119_isala_cross_7+Q0.Leeftijd+Q2.30.Other
Smoker	0.238638	0.0687061	3.47332	0.000521265	0.00606563	{False: 2827, True: 216}	rag_shannon ~lib_size+read_conc_norm+run20201009_isala_cross_1+run20201016_isala_cross_2+run20201023_isala_cross_3+run20201030_isala_cross_4+run20201106_isala_cross_5+run20201120_isala_cross_6+run20201204_isala_cross_8+run20201211_isala_cross_9+run20210119_isala_cross_7+Q0.Leeftijd+Q1.Q21.Current_smoker
Drug user	0.068874	0.0634571	1.08536	0.277847	0.595221	{False: 2780, True: 263}	rag_shannon ~lib_size+read_conc_norm+run20201009_isala_cross_1+run20201016_isala_cross_2+run20201023_isala_cross_3+run20201030_isala_cross_4+run20201106_isala_cross_5+run20201120_isala_cross_6+run20201204_isala_cross_8+run20201211_isala_cross_9+run20210119_isala_cross_7+Q0.Leeftijd+Q1.Q21.Current_druguser
Attempted pregnancy	-0.0193095	0.0427007	-0.452206	0.651153	0.825901	{True: 1111, False: 1932}	rag_shannon ~lib_size+read_conc_norm+run20201009_isala_cross_1+run20201016_isala_cross_2+run20201023_isala_cross_3+run20201030_isala_cross_4+run20201106_isala_cross_5+run20201120_isala_cross_6+run20201204_isala_cross_8+run20201211_isala_cross_9+run20210119_isala_cross_7+Q0.Leeftijd+Q1.Q49.Attempted_pregnancy
Currently breastfeeding	0.217813	0.119444	1.82356	0.0683181	0.248824	{False: 2962, True: 68, nan: 13}	rag_shannon ~lib_size+read_conc_norm+run20201009_isala_cross_1+run20201016_isala_cross_2+run20201023_isala_cross_3+run20201030_isala_cross_4+run20201106_isala_cross_5+run20201120_isala_cross_6+run20201204_isala_cross_8+run20201211_isala_cross_9+run20210119_isala_cross_7+Q0.Leeftijd+Q2.Q24.Breastfeeding
Peri/Post-menopausal	0.373125	0.100484	3.71327	0.000208284	0.00298635	{False: 2884, True: 159}	rag_shannon ~lib_size+read_conc_norm+run20201009_isala_cross_1+run20201016_isala_cross_2+run20201023_isala_cross_3+run20201030_isala_cross_4+run20201106_isala_cross_5+run20201120_isala_cross_6+run20201204_isala_cross_8+run20201211_isala_cross_9+run20210119_isala_cross_7+Q0.Leeftijd+Q1.Q52.peri_or_menopause
High endogenous estrogen	0.0469375	0.052642	0.891635	0.372659	0.663954	{True: 395, False: 2648}	rag_shannon ~lib_size+read_conc_norm+run20201009_isala_cross_1+run20201016_isala_cross_2+run20201023_isala_cross_3+run20201030_isala_cross_4+run20201106_isala_cross_5+run20201120_isala_cross_6+run20201204_isala_cross_8+run20201211_isala_cross_9+run20210119_isala_cross_7+Q0.Leeftijd+A.high_endogenous_estrogen
High exogenous estrogen	-0.142653	0.0502197	-2.84057	0.0045333	0.0331578	{False: 2603, True: 440}	rag_shannon ~lib_size+read_conc_norm+run20201009_isala_cross_1+run20201016_isala_cross_2+run20201023_isala_cross_3+run20201030_isala_cross_4+run20201106_isala_cross_5+run20201120_isala_cross_6+run20201204_isala_cross_8+run20201211_isala_cross_9+run20210119_isala_cross_7+Q0.Leeftijd+A.high_exogenous_estrogen
High endogenous progestogen	-0.0365512	0.0373829	-0.977751	0.328275	0.640843	{False: 1031, True: 2012}	rag_shannon ~lib_size+read_conc_norm+run20201009_isala_cross_1+run20201016_isala_cross_2+run20201023_isala_cross_3+run20201030_isala_cross_4+run20201106_isala_cross_5+run20201120_isala_cross_6+run20201204_isala_cross_8+run20201211_isala_cross_9+run20210119_isala_cross_7+Q0.Leeftijd+A.high_endogenous_progestogen
High exogenous progestogen	-0.0365512	0.0373829	-0.977751	0.328275	0.640843	{False: 1031, True: 2012}	rag_shannon ~lib_size+read_conc_norm+run20201009_isala_cross_1+run20201016_isala_cross_2+run20201023_isala_cross_3+run20201030_isala_cross_4+run20201106_isala_cross_5+run20201120_isala_cross_6+run20201204_isala_cross_8+run20201211_isala_cross_9+run20210119_isala_cross_7+Q0.Leeftijd+A.high_exogenous_progestogen
Increased stress	0.0390203	0.0177818	2.19439	0.0282828	0.132851	3043	rag_shannon ~lib_size+read_conc_norm+run20201009_isala_cross_1+run20201016_isala_cross_2+run20201023_isala_cross_3+run20201030_isala_cross_4+run20201106_isala_cross_5+run20201120_isala_cross_6+run20201204_isala_cross_8+run20201211_isala_cross_9+run20210119_isala_cross_7+Q0.Leeftijd+Q2.Q20.Increase_in_stress_or_feeling_down
Vaginal douching	-0.000117866	0.0877027	-0.00134393	0.998928	0.999719	{False: 2914, True: 129}	rag_shannon ~lib_size+read_conc_norm+run20201009_isala_cross_1+run20201016_isala_cross_2+run20201023_isala_cross_3+run20201030_isala_cross_4+run20201106_isala_cross_5+run20201120_isala_cross_6+run20201204_isala_cross_8+run20201211_isala_cross_9+run20210119_isala_cross_7+Q0.Leeftijd+Q1.Q70.Vaginal_douching
Born in belgium	-0.197411	0.0779534	-2.53242	0.0113778	0.0647271	{True: 2878, False: 165}	rag_shannon ~lib_size+read_conc_norm+run20201009_isala_cross_1+run20201016_isala_cross_2+run20201023_isala_cross_3+run20201030_isala_cross_4+run20201106_isala_cross_5+run20201120_isala_cross_6+run20201204_isala_cross_8+run20201211_isala_cross_9+run20210119_isala_cross_7+Q0.Leeftijd+Q1.Q8.Belgian_born
Antibiotics (last 3 months)	-0.110876	0.0435561	-2.54558	0.0109587	0.0630435	{True: 631, False: 2412}	rag_shannon ~lib_size+read_conc_norm+run20201009_isala_cross_1+run20201016_isala_cross_2+run20201023_isala_cross_3+run20201030_isala_cross_4+run20201106_isala_cross_5+run20201120_isala_cross_6+run20201204_isala_cross_8+run20201211_isala_cross_9+run20210119_isala_cross_7+Q0.Leeftijd+Q1.Q40.Antibiotic_use_last_3_months
Antibiotics (ever)	-0.0382923	0.094134	-0.406785	0.684197	0.844117	{True: 2711, False: 111, nan: 221}	rag_shannon ~lib_size+read_conc_norm+run20201009_isala_cross_1+run20201016_isala_cross_2+run20201023_isala_cross_3+run20201030_isala_cross_4+run20201106_isala_cross_5+run20201120_isala_cross_6+run20201204_isala_cross_8+run20201211_isala_cross_9+run20210119_isala_cross_7+Q0.Leeftijd+Q1.Q41.Ever_antibiotic_treatment
Vaginal intercourse (in last 3 months)	0.0712891	0.0447444	1.59325	0.11123	0.343071	{True: 612, False: 1898, nan: 533}	rag_shannon ~lib_size+read_conc_norm+run20201009_isala_cross_1+run20201016_isala_cross_2+run20201023_isala_cross_3+run20201030_isala_cross_4+run20201106_isala_cross_5+run20201120_isala_cross_6+run20201204_isala_cross_8+run20201211_isala_cross_9+run20210119_isala_cross_7+Q0.Leeftijd+Q1.Q48.2.Vaginal_sex_during_period_last_3months
New medication	-0.0486714	0.049445	-0.984354	0.325021	0.640843	{False: 2573, True: 458, nan: 12}	rag_shannon ~lib_size+read_conc_norm+run20201009_isala_cross_1+run20201016_isala_cross_2+run20201023_isala_cross_3+run20201030_isala_cross_4+run20201106_isala_cross_5+run20201120_isala_cross_6+run20201204_isala_cross_8+run20201211_isala_cross_9+run20210119_isala_cross_7+Q0.Leeftijd+Q2.Q29.Recent_new_medication
Took a bath (in last 24h)	0.0696513	0.0671692	1.03695	0.29984	0.622839	{False: 2815, True: 228}	rag_shannon ~lib_size+read_conc_norm+run20201009_isala_cross_1+run20201016_isala_cross_2+run20201023_isala_cross_3+run20201030_isala_cross_4+run20201106_isala_cross_5+run20201120_isala_cross_6+run20201204_isala_cross_8+run20201211_isala_cross_9+run20210119_isala_cross_7+Q0.Leeftijd+Q2.32.Took_a_bath
Took a shower (in last 24h)	0.0118292	0.0400225	0.295564	0.767583	0.91823	{False: 2209, True: 834}	rag_shannon ~lib_size+read_conc_norm+run20201009_isala_cross_1+run20201016_isala_cross_2+run20201023_isala_cross_3+run20201030_isala_cross_4+run20201106_isala_cross_5+run20201120_isala_cross_6+run20201204_isala_cross_8+run20201211_isala_cross_9+run20210119_isala_cross_7+Q0.Leeftijd+Q2.32.Took_a_shower
Slept with underwear (in last 24h)	0.062345	0.0439398	1.41887	0.156039	0.409702	{False: 2409, True: 634}	rag_shannon ~lib_size+read_conc_norm+run20201009_isala_cross_1+run20201016_isala_cross_2+run20201023_isala_cross_3+run20201030_isala_cross_4+run20201106_isala_cross_5+run20201120_isala_cross_6+run20201204_isala_cross_8+run20201211_isala_cross_9+run20210119_isala_cross_7+Q0.Leeftijd+Q2.32.Slept_with_underwear
Only washed vagina (in last 24h)	-0.112441	0.112699	-0.997714	0.318498	0.636996	{False: 2966, True: 77}	rag_shannon ~lib_size+read_conc_norm+run20201009_isala_cross_1+run20201016_isala_cross_2+run20201023_isala_cross_3+run20201030_isala_cross_4+run20201106_isala_cross_5+run20201120_isala_cross_6+run20201204_isala_cross_8+run20201211_isala_cross_9+run20210119_isala_cross_7+Q0.Leeftijd+Q2.32.Only_washed_vagina
Preterm birth	-0.0543789	0.0965214	-0.563387	0.573213	0.774367	{False: 2935, True: 108}	rag_shannon ~lib_size+read_conc_norm+run20201009_isala_cross_1+run20201016_isala_cross_2+run20201023_isala_cross_3+run20201030_isala_cross_4+run20201106_isala_cross_5+run20201120_isala_cross_6+run20201204_isala_cross_8+run20201211_isala_cross_9+run20210119_isala_cross_7+Q0.Leeftijd+Q1.Q50.preterm_birth
Miscarriage	0.0304588	0.0580849	0.524384	0.60005	0.7927	{False: 2707, True: 336}	rag_shannon ~lib_size+read_conc_norm+run20201009_isala_cross_1+run20201016_isala_cross_2+run20201023_isala_cross_3+run20201030_isala_cross_4+run20201106_isala_cross_5+run20201120_isala_cross_6+run20201204_isala_cross_8+run20201211_isala_cross_9+run20210119_isala_cross_7+Q0.Leeftijd+Q1.Q50.miscarriage
Had abortion	0.143359	0.0927684	1.54535	0.122367	0.36215	{False: 2927, True: 116}	rag_shannon ~lib_size+read_conc_norm+run20201009_isala_cross_1+run20201016_isala_cross_2+run20201023_isala_cross_3+run20201030_isala_cross_4+run20201106_isala_cross_5+run20201120_isala_cross_6+run20201204_isala_cross_8+run20201211_isala_cross_9+run20210119_isala_cross_7+Q0.Leeftijd+Q1.Q50.abortion
Luteal phase	-0.249619	0.061213	-4.07787	4.89962e-05	0.000929113	{False: 591, nan: 2012, True: 440}	rag_shannon ~lib_size+read_conc_norm+run20201009_isala_cross_1+run20201016_isala_cross_2+run20201023_isala_cross_3+run20201030_isala_cross_4+run20201106_isala_cross_5+run20201120_isala_cross_6+run20201204_isala_cross_8+run20201211_isala_cross_9+run20210119_isala_cross_7+Q0.Leeftijd+A.has_cycle.phase.luteal
Ovulation phase	0.0385779	0.0627859	0.614435	0.539065	0.76667	{True: 395, nan: 2012, False: 636}	rag_shannon ~lib_size+read_conc_norm+run20201009_isala_cross_1+run20201016_isala_cross_2+run20201023_isala_cross_3+run20201030_isala_cross_4+run20201106_isala_cross_5+run20201120_isala_cross_6+run20201204_isala_cross_8+run20201211_isala_cross_9+run20210119_isala_cross_7+Q0.Leeftijd+A.has_cycle.phase.ovulation
Follicular phase	0.338206	0.0771527	4.38359	1.28856e-05	0.000314164	{False: 835, nan: 2012, True: 196}	rag_shannon ~lib_size+read_conc_norm+run20201009_isala_cross_1+run20201016_isala_cross_2+run20201023_isala_cross_3+run20201030_isala_cross_4+run20201106_isala_cross_5+run20201120_isala_cross_6+run20201204_isala_cross_8+run20201211_isala_cross_9+run20210119_isala_cross_7+Q0.Leeftijd+A.has_cycle.phase.follicular
Partner is man	-0.0998247	0.128181	-0.778781	0.436187	0.706061	{True: 2317, False: 58, nan: 668}	rag_shannon ~lib_size+read_conc_norm+run20201009_isala_cross_1+run20201016_isala_cross_2+run20201023_isala_cross_3+run20201030_isala_cross_4+run20201106_isala_cross_5+run20201120_isala_cross_6+run20201204_isala_cross_8+run20201211_isala_cross_9+run20210119_isala_cross_7+Q0.Leeftijd+Q1.Q4.has_partner.Man
Partner is woman	0.0998247	0.128181	0.778781	0.436187	0.706061	{False: 2317, True: 58, nan: 668}	rag_shannon ~lib_size+read_conc_norm+run20201009_isala_cross_1+run20201016_isala_cross_2+run20201023_isala_cross_3+run20201030_isala_cross_4+run20201106_isala_cross_5+run20201120_isala_cross_6+run20201204_isala_cross_8+run20201211_isala_cross_9+run20210119_isala_cross_7+Q0.Leeftijd+Q1.Q4.has_partner.Vrouw
Contraceptive: Hormonal contraception	-0.0639907	0.0383292	-1.6695	0.0951208	0.307341	{True: 1885, False: 1158}	rag_shannon ~lib_size+read_conc_norm+run20201009_isala_cross_1+run20201016_isala_cross_2+run20201023_isala_cross_3+run20201030_isala_cross_4+run20201106_isala_cross_5+run20201120_isala_cross_6+run20201204_isala_cross_8+run20201211_isala_cross_9+run20210119_isala_cross_7+Q0.Leeftijd+Q2.Q25.hormonal_contraception
Number of vaginal complaints	0.0198805	0.017723	1.12174	0.262063	0.570963	3043	rag_shannon ~lib_size+read_conc_norm+run20201009_isala_cross_1+run20201016_isala_cross_2+run20201023_isala_cross_3+run20201030_isala_cross_4+run20201106_isala_cross_5+run20201120_isala_cross_6+run20201204_isala_cross_8+run20201211_isala_cross_9+run20210119_isala_cross_7+Q0.Leeftijd+Q2.Q30.n_vaginal_complaints
Has vaginal complaints	0.0344575	0.0385713	0.893346	0.371743	0.663954	{True: 923, False: 2120}	rag_shannon ~lib_size+read_conc_norm+run20201009_isala_cross_1+run20201016_isala_cross_2+run20201023_isala_cross_3+run20201030_isala_cross_4+run20201106_isala_cross_5+run20201120_isala_cross_6+run20201204_isala_cross_8+run20201211_isala_cross_9+run20210119_isala_cross_7+Q0.Leeftijd+Q2.Q30.has_vaginal_complaints
Mental health: Nervous	0.0580973	0.0418738	1.38744	0.16541	0.427728	{False: 2323, True: 720}	rag_shannon ~lib_size+read_conc_norm+run20201009_isala_cross_1+run20201016_isala_cross_2+run20201023_isala_cross_3+run20201030_isala_cross_4+run20201106_isala_cross_5+run20201120_isala_cross_6+run20201204_isala_cross_8+run20201211_isala_cross_9+run20210119_isala_cross_7+Q0.Leeftijd+Q1.Q46.nervous
Mental health: Nothing can cheer me up	0.0713313	0.0785303	0.908328	0.363777	0.663954	{False: 2879, True: 164}	rag_shannon ~lib_size+read_conc_norm+run20201009_isala_cross_1+run20201016_isala_cross_2+run20201023_isala_cross_3+run20201030_isala_cross_4+run20201106_isala_cross_5+run20201120_isala_cross_6+run20201204_isala_cross_8+run20201211_isala_cross_9+run20210119_isala_cross_7+Q0.Leeftijd+Q1.Q46.nothing_to_cheer_up
Mental health: Calm	-0.0039505	0.0381559	-0.103536	0.917545	0.983925	{True: 2080, False: 963}	rag_shannon ~lib_size+read_conc_norm+run20201009_isala_cross_1+run20201016_isala_cross_2+run20201023_isala_cross_3+run20201030_isala_cross_4+run20201106_isala_cross_5+run20201120_isala_cross_6+run20201204_isala_cross_8+run20201211_isala_cross_9+run20210119_isala_cross_7+Q0.Leeftijd+Q1.Q46.calm
Mental health: Sad	0.0556808	0.0554134	1.00482	0.315061	0.63629	{False: 2687, True: 356}	rag_shannon ~lib_size+read_conc_norm+run20201009_isala_cross_1+run20201016_isala_cross_2+run20201023_isala_cross_3+run20201030_isala_cross_4+run20201106_isala_cross_5+run20201120_isala_cross_6+run20201204_isala_cross_8+run20201211_isala_cross_9+run20210119_isala_cross_7+Q0.Leeftijd+Q1.Q46.sad
Mental health: Happy	0.0234238	0.0434541	0.539046	0.589895	0.78723	{True: 2404, False: 639}	rag_shannon ~lib_size+read_conc_norm+run20201009_isala_cross_1+run20201016_isala_cross_2+run20201023_isala_cross_3+run20201030_isala_cross_4+run20201106_isala_cross_5+run20201120_isala_cross_6+run20201204_isala_cross_8+run20201211_isala_cross_9+run20210119_isala_cross_7+Q0.Leeftijd+Q1.Q46.happy
Mental health: Stressed	-0.00843867	0.0375164	-0.224933	0.822046	0.967235	{True: 1073, False: 1970}	rag_shannon ~lib_size+read_conc_norm+run20201009_isala_cross_1+run20201016_isala_cross_2+run20201023_isala_cross_3+run20201030_isala_cross_4+run20201106_isala_cross_5+run20201120_isala_cross_6+run20201204_isala_cross_8+run20201211_isala_cross_9+run20210119_isala_cross_7+Q0.Leeftijd+Q1.Q46.stressed
Frequency of sex	0.0284039	0.0192098	1.47861	0.139367	0.39138	2560	rag_shannon ~lib_size+read_conc_norm+run20201009_isala_cross_1+run20201016_isala_cross_2+run20201023_isala_cross_3+run20201030_isala_cross_4+run20201106_isala_cross_5+run20201120_isala_cross_6+run20201204_isala_cross_8+run20201211_isala_cross_9+run20210119_isala_cross_7+Q0.Leeftijd+Q1.Q48.1_sex_frequency
Non-belgian identity	0.00223515	0.0594643	0.0375881	0.970019	0.998009	{False: 2743, True: 300}	rag_shannon ~lib_size+read_conc_norm+run20201009_isala_cross_1+run20201016_isala_cross_2+run20201023_isala_cross_3+run20201030_isala_cross_4+run20201106_isala_cross_5+run20201120_isala_cross_6+run20201204_isala_cross_8+run20201211_isala_cross_9+run20210119_isala_cross_7+Q0.Leeftijd+Q1.Q13_1.Other_cultural_identity
PPI use	-0.0752934	0.0998521	-0.754049	0.450878	0.706061	{False: 2944, True: 99}	rag_shannon ~lib_size+read_conc_norm+run20201009_isala_cross_1+run20201016_isala_cross_2+run20201023_isala_cross_3+run20201030_isala_cross_4+run20201106_isala_cross_5+run20201120_isala_cross_6+run20201204_isala_cross_8+run20201211_isala_cross_9+run20210119_isala_cross_7+Q0.Leeftijd+Q1.Q42.ppi_use
Hygeine: Tampon (last 48 hours)	0.0846659	0.0992318	0.853213	0.393609	0.670863	{False: 2943, True: 100}	rag_shannon ~lib_size+read_conc_norm+run20201009_isala_cross_1+run20201016_isala_cross_2+run20201023_isala_cross_3+run20201030_isala_cross_4+run20201106_isala_cross_5+run20201120_isala_cross_6+run20201204_isala_cross_8+run20201211_isala_cross_9+run20210119_isala_cross_7+Q0.Leeftijd+Q2.Q29_48h_Tampon
Hygeine: Pad (last 48 hours)	0.319601	0.075353	4.24138	2.28797e-05	0.0004881	{False: 2866, True: 177}	rag_shannon ~lib_size+read_conc_norm+run20201009_isala_cross_1+run20201016_isala_cross_2+run20201023_isala_cross_3+run20201030_isala_cross_4+run20201106_isala_cross_5+run20201120_isala_cross_6+run20201204_isala_cross_8+run20201211_isala_cross_9+run20210119_isala_cross_7+Q0.Leeftijd+Q2.Q29_48h_Maandverband
Hygeine: Cup (last 48 hours)	0.252663	0.111946	2.25701	0.0240782	0.116302	{False: 2965, True: 78}	rag_shannon ~lib_size+read_conc_norm+run20201009_isala_cross_1+run20201016_isala_cross_2+run20201023_isala_cross_3+run20201030_isala_cross_4+run20201106_isala_cross_5+run20201120_isala_cross_6+run20201204_isala_cross_8+run20201211_isala_cross_9+run20210119_isala_cross_7+Q0.Leeftijd+Q2.Q29_48h_Menstruatiecup
Hygeine: Pantyliner (last 48 hours)	0.0891348	0.0416262	2.14131	0.0323282	0.149318	{True: 725, False: 2318}	rag_shannon ~lib_size+read_conc_norm+run20201009_isala_cross_1+run20201016_isala_cross_2+run20201023_isala_cross_3+run20201030_isala_cross_4+run20201106_isala_cross_5+run20201120_isala_cross_6+run20201204_isala_cross_8+run20201211_isala_cross_9+run20210119_isala_cross_7+Q0.Leeftijd+Q2.Q29_48h_Inlegkruisje
Hygeine: Tampon	-0.111753	0.0361264	-3.09339	0.00199689	0.0174259	{False: 1712, True: 1331}	rag_shannon ~lib_size+read_conc_norm+run20201009_isala_cross_1+run20201016_isala_cross_2+run20201023_isala_cross_3+run20201030_isala_cross_4+run20201106_isala_cross_5+run20201120_isala_cross_6+run20201204_isala_cross_8+run20201211_isala_cross_9+run20210119_isala_cross_7+Q0.Leeftijd+Q1.Q52.8_period_hygeine_Tampon
Hygeine: Pad	0.0947374	0.0361577	2.62012	0.00883375	0.0544925	{True: 1499, False: 1544}	rag_shannon ~lib_size+read_conc_norm+run20201009_isala_cross_1+run20201016_isala_cross_2+run20201023_isala_cross_3+run20201030_isala_cross_4+run20201106_isala_cross_5+run20201120_isala_cross_6+run20201204_isala_cross_8+run20201211_isala_cross_9+run20210119_isala_cross_7+Q0.Leeftijd+Q1.Q52.8_period_hygeine_Maandverband
Hygeine: Menstrual cup	-0.089649	0.0423597	-2.11637	0.0343943	0.15584	{False: 2327, True: 716}	rag_shannon ~lib_size+read_conc_norm+run20201009_isala_cross_1+run20201016_isala_cross_2+run20201023_isala_cross_3+run20201030_isala_cross_4+run20201106_isala_cross_5+run20201120_isala_cross_6+run20201204_isala_cross_8+run20201211_isala_cross_9+run20210119_isala_cross_7+Q0.Leeftijd+Q1.Q52.8_period_hygeine_Menstruatiecup
Hygeine: Pantyliner	-0.0706393	0.0374163	-1.88793	0.0591306	0.222609	{True: 1052, False: 1991}	rag_shannon ~lib_size+read_conc_norm+run20201009_isala_cross_1+run20201016_isala_cross_2+run20201023_isala_cross_3+run20201030_isala_cross_4+run20201106_isala_cross_5+run20201120_isala_cross_6+run20201204_isala_cross_8+run20201211_isala_cross_9+run20210119_isala_cross_7+Q0.Leeftijd+Q1.Q52.8_period_hygeine_Inlegkruisje
Time to sample arrival	0.0141104	0.0178995	0.78831	0.430577	0.706061	3039	rag_shannon ~lib_size+read_conc_norm+run20201009_isala_cross_1+run20201016_isala_cross_2+run20201023_isala_cross_3+run20201030_isala_cross_4+run20201106_isala_cross_5+run20201120_isala_cross_6+run20201204_isala_cross_8+run20201211_isala_cross_9+run20210119_isala_cross_7+Q0.Leeftijd+A.time_to_arrival
Vegetarian	-0.0375276	0.0762021	-0.492475	0.622419	0.806781	{False: 2869, True: 174}	rag_shannon ~lib_size+read_conc_norm+run20201009_isala_cross_1+run20201016_isala_cross_2+run20201023_isala_cross_3+run20201030_isala_cross_4+run20201106_isala_cross_5+run20201120_isala_cross_6+run20201204_isala_cross_8+run20201211_isala_cross_9+run20210119_isala_cross_7+Q0.Leeftijd+Q1.Q29.vegetarian
Pescetarian	-0.0615942	0.0582532	-1.05735	0.290435	0.614473	{False: 2728, True: 315}	rag_shannon ~lib_size+read_conc_norm+run20201009_isala_cross_1+run20201016_isala_cross_2+run20201023_isala_cross_3+run20201030_isala_cross_4+run20201106_isala_cross_5+run20201120_isala_cross_6+run20201204_isala_cross_8+run20201211_isala_cross_9+run20210119_isala_cross_7+Q0.Leeftijd+Q1.Q29.pescetarian
Vegan	-0.0736285	0.0781247	-0.942448	0.346039	0.651367	{False: 2878, True: 165}	rag_shannon ~lib_size+read_conc_norm+run20201009_isala_cross_1+run20201016_isala_cross_2+run20201023_isala_cross_3+run20201030_isala_cross_4+run20201106_isala_cross_5+run20201120_isala_cross_6+run20201204_isala_cross_8+run20201211_isala_cross_9+run20210119_isala_cross_7+Q0.Leeftijd+Q1.Q29.vegan
Living in urbanised area	-0.0268922	0.0471182	-0.570739	0.568219	0.773745	{True: 2524, False: 519}	rag_shannon ~lib_size+read_conc_norm+run20201009_isala_cross_1+run20201016_isala_cross_2+run20201023_isala_cross_3+run20201030_isala_cross_4+run20201106_isala_cross_5+run20201120_isala_cross_6+run20201204_isala_cross_8+run20201211_isala_cross_9+run20210119_isala_cross_7+Q0.Leeftijd+Q1.Q15.living_in_urban_area
Living in countryside	0.0268922	0.0471182	0.570739	0.568219	0.773745	{False: 2524, True: 519}	rag_shannon ~lib_size+read_conc_norm+run20201009_isala_cross_1+run20201016_isala_cross_2+run20201023_isala_cross_3+run20201030_isala_cross_4+run20201106_isala_cross_5+run20201120_isala_cross_6+run20201204_isala_cross_8+run20201211_isala_cross_9+run20210119_isala_cross_7+Q0.Leeftijd+Q1.Q15.living_in_coutryside
First 3 years in belgium	-0.171903	0.0828711	-2.07434	0.0381321	0.16003	{True: 2898, False: 145}	rag_shannon ~lib_size+read_conc_norm+run20201009_isala_cross_1+run20201016_isala_cross_2+run20201023_isala_cross_3+run20201030_isala_cross_4+run20201106_isala_cross_5+run20201120_isala_cross_6+run20201204_isala_cross_8+run20201211_isala_cross_9+run20210119_isala_cross_7+Q0.Leeftijd+Q1.Q9.first_3_years_in_belgium
Monogamous partner	-0.0872058	0.0484922	-1.79835	0.0722304	0.256819	{nan: 241, True: 2319, False: 483}	rag_shannon ~lib_size+read_conc_norm+run20201009_isala_cross_1+run20201016_isala_cross_2+run20201023_isala_cross_3+run20201030_isala_cross_4+run20201106_isala_cross_5+run20201120_isala_cross_6+run20201204_isala_cross_8+run20201211_isala_cross_9+run20210119_isala_cross_7+Q0.Leeftijd+Q1.Q47.one_partner_vs_single
Multiple partners	0.25192	0.065632	3.83836	0.000126871	0.00202993	{True: 241, False: 2319, nan: 483}	rag_shannon ~lib_size+read_conc_norm+run20201009_isala_cross_1+run20201016_isala_cross_2+run20201023_isala_cross_3+run20201030_isala_cross_4+run20201106_isala_cross_5+run20201120_isala_cross_6+run20201204_isala_cross_8+run20201211_isala_cross_9+run20210119_isala_cross_7+Q0.Leeftijd+Q1.Q47.one_partner_vs_many
% contribution to household income	0.00951975	0.0183692	0.518244	0.604326	0.793371	3040	rag_shannon ~lib_size+read_conc_norm+run20201009_isala_cross_1+run20201016_isala_cross_2+run20201023_isala_cross_3+run20201030_isala_cross_4+run20201106_isala_cross_5+run20201120_isala_cross_6+run20201204_isala_cross_8+run20201211_isala_cross_9+run20210119_isala_cross_7+Q0.Leeftijd+Q2.Q27.contribution_to_household_income
Financial difficulties	0.0988253	0.0527564	1.87324	0.0611319	0.228464	{False: 2647, True: 394, nan: 2}	rag_shannon ~lib_size+read_conc_norm+run20201009_isala_cross_1+run20201016_isala_cross_2+run20201023_isala_cross_3+run20201030_isala_cross_4+run20201106_isala_cross_5+run20201120_isala_cross_6+run20201204_isala_cross_8+run20201211_isala_cross_9+run20210119_isala_cross_7+Q0.Leeftijd+Q2.Q4.financial_difficulties
Poverty	0.211971	0.0808226	2.62267	0.00878751	0.0544925	{False: 1946, nan: 934, True: 163}	rag_shannon ~lib_size+read_conc_norm+run20201009_isala_cross_1+run20201016_isala_cross_2+run20201023_isala_cross_3+run20201030_isala_cross_4+run20201106_isala_cross_5+run20201120_isala_cross_6+run20201204_isala_cross_8+run20201211_isala_cross_9+run20210119_isala_cross_7+Q0.Leeftijd+Q2.Q5.poverty
HPV Vaccinated	-0.0536168	0.0404703	-1.32484	0.185323	0.457023	{True: 1221, False: 1822}	rag_shannon ~lib_size+read_conc_norm+run20201009_isala_cross_1+run20201016_isala_cross_2+run20201023_isala_cross_3+run20201030_isala_cross_4+run20201106_isala_cross_5+run20201120_isala_cross_6+run20201204_isala_cross_8+run20201211_isala_cross_9+run20210119_isala_cross_7+Q0.Leeftijd+Q1.Q58.hpv_vaccinated
No intercourse in last 24h	-0.0916825	0.0403654	-2.27131	0.0231978	0.113862	{1.0: 2255, 0.0: 787, nan: 1}	rag_shannon ~lib_size+read_conc_norm+run20201009_isala_cross_1+run20201016_isala_cross_2+run20201023_isala_cross_3+run20201030_isala_cross_4+run20201106_isala_cross_5+run20201120_isala_cross_6+run20201204_isala_cross_8+run20201211_isala_cross_9+run20210119_isala_cross_7+Q0.Leeftijd+A.IntercourseNo
Unknown intercourse in last 24h	-0.0301418	0.0525923	-0.573121	0.566605	0.773745	{0.0: 2645, 1.0: 397, nan: 1}	rag_shannon ~lib_size+read_conc_norm+run20201009_isala_cross_1+run20201016_isala_cross_2+run20201023_isala_cross_3+run20201030_isala_cross_4+run20201106_isala_cross_5+run20201120_isala_cross_6+run20201204_isala_cross_8+run20201211_isala_cross_9+run20210119_isala_cross_7+Q0.Leeftijd+A.IntercourseUnknown
Intercourse in last 24h	0.189375	0.0530258	3.57138	0.000360625	0.00450341	{0.0: 2652, 1.0: 390, nan: 1}	rag_shannon ~lib_size+read_conc_norm+run20201009_isala_cross_1+run20201016_isala_cross_2+run20201023_isala_cross_3+run20201030_isala_cross_4+run20201106_isala_cross_5+run20201120_isala_cross_6+run20201204_isala_cross_8+run20201211_isala_cross_9+run20210119_isala_cross_7+Q0.Leeftijd+A.IntercourseYes
Health status: Good	-0.0152543	0.0359631	-0.424166	0.671475	0.838524	{1.0: 1794, 0.0: 1249}	rag_shannon ~lib_size+read_conc_norm+run20201009_isala_cross_1+run20201016_isala_cross_2+run20201023_isala_cross_3+run20201030_isala_cross_4+run20201106_isala_cross_5+run20201120_isala_cross_6+run20201204_isala_cross_8+run20201211_isala_cross_9+run20210119_isala_cross_7+Q0.Leeftijd+Q1.Q34.Hoe_beoordeel_je_je_algemene_gezondheidstoestandGoed
Health status: Acceptable	0.1266	0.0531585	2.38155	0.0173014	0.0922739	{0.0: 2658, 1.0: 385}	rag_shannon ~lib_size+read_conc_norm+run20201009_isala_cross_1+run20201016_isala_cross_2+run20201023_isala_cross_3+run20201030_isala_cross_4+run20201106_isala_cross_5+run20201120_isala_cross_6+run20201204_isala_cross_8+run20201211_isala_cross_9+run20210119_isala_cross_7+Q0.Leeftijd+Q1.Q34.Hoe_beoordeel_je_je_algemene_gezondheidstoestandRedelijk
Health status: Poor	0.142391	0.161231	0.883149	0.377226	0.663954	{0.0: 3006, 1.0: 37}	rag_shannon ~lib_size+read_conc_norm+run20201009_isala_cross_1+run20201016_isala_cross_2+run20201023_isala_cross_3+run20201030_isala_cross_4+run20201106_isala_cross_5+run20201120_isala_cross_6+run20201204_isala_cross_8+run20201211_isala_cross_9+run20210119_isala_cross_7+Q0.Leeftijd+Q1.Q34.Hoe_beoordeel_je_je_algemene_gezondheidstoestandSlecht
Health status: Very good	-0.0592205	0.0397355	-1.49037	0.136232	0.387504	{0.0: 2217, 1.0: 826}	rag_shannon ~lib_size+read_conc_norm+run20201009_isala_cross_1+run20201016_isala_cross_2+run20201023_isala_cross_3+run20201030_isala_cross_4+run20201106_isala_cross_5+run20201120_isala_cross_6+run20201204_isala_cross_8+run20201211_isala_cross_9+run20210119_isala_cross_7+Q0.Leeftijd+Q1.Q34.Hoe_beoordeel_je_je_algemene_gezondheidstoestandZeer_goed
Health status: Very poor	-0.873752	0.97449	-0.896625	0.36999	0.663954	{0.0: 3042, 1.0: 1}	rag_shannon ~lib_size+read_conc_norm+run20201009_isala_cross_1+run20201016_isala_cross_2+run20201023_isala_cross_3+run20201030_isala_cross_4+run20201106_isala_cross_5+run20201120_isala_cross_6+run20201204_isala_cross_8+run20201211_isala_cross_9+run20210119_isala_cross_7+Q0.Leeftijd+Q1.Q34.Hoe_beoordeel_je_je_algemene_gezondheidstoestandZeer_slecht
Relationship status: One partner	-0.0975803	0.0417581	-2.3368	0.0195145	0.0999144	{1.0: 2322, 0.0: 721}	rag_shannon ~lib_size+read_conc_norm+run20201009_isala_cross_1+run20201016_isala_cross_2+run20201023_isala_cross_3+run20201030_isala_cross_4+run20201106_isala_cross_5+run20201120_isala_cross_6+run20201204_isala_cross_8+run20201211_isala_cross_9+run20210119_isala_cross_7+Q0.Leeftijd+Q1.Q3.Zo_beschrijf_je_best_mijn_huidige_relatiestatus.CLEANEDVaste_partner
Relationship status: Single	0.0848626	0.0431749	1.96556	0.0494411	0.191771	{0.0: 2389, 1.0: 654}	rag_shannon ~lib_size+read_conc_norm+run20201009_isala_cross_1+run20201016_isala_cross_2+run20201023_isala_cross_3+run20201030_isala_cross_4+run20201106_isala_cross_5+run20201120_isala_cross_6+run20201204_isala_cross_8+run20201211_isala_cross_9+run20210119_isala_cross_7+Q0.Leeftijd+Q1.Q3.Zo_beschrijf_je_best_mijn_huidige_relatiestatus.CLEANEDVrijgezel
Relationship status: Multiple partners	0.152078	0.120939	1.25747	0.208679	0.497811	{0.0: 2976, 1.0: 67}	rag_shannon ~lib_size+read_conc_norm+run20201009_isala_cross_1+run20201016_isala_cross_2+run20201023_isala_cross_3+run20201030_isala_cross_4+run20201106_isala_cross_5+run20201120_isala_cross_6+run20201204_isala_cross_8+run20201211_isala_cross_9+run20210119_isala_cross_7+Q0.Leeftijd+Q1.Q3.Zo_beschrijf_je_best_mijn_huidige_relatiestatus.CLEANEDWisselende_partners
Weeknight sleep: <7h	0.142651	0.0458774	3.1094	0.00189209	0.0169956	{0.0: 2487, 1.0: 556}	rag_shannon ~lib_size+read_conc_norm+run20201009_isala_cross_1+run20201016_isala_cross_2+run20201023_isala_cross_3+run20201030_isala_cross_4+run20201106_isala_cross_5+run20201120_isala_cross_6+run20201204_isala_cross_8+run20201211_isala_cross_9+run20210119_isala_cross_7+Q0.Leeftijd+Q1.Q25_1.Hours_Sleep_weekA
Weeknight <7hA	-1.08342	0.974619	-1.11163	0.266383	0.577006	{0.0: 3042, 1.0: 1}	rag_shannon ~lib_size+read_conc_norm+run20201009_isala_cross_1+run20201016_isala_cross_2+run20201023_isala_cross_3+run20201030_isala_cross_4+run20201106_isala_cross_5+run20201120_isala_cross_6+run20201204_isala_cross_8+run20201211_isala_cross_9+run20210119_isala_cross_7+Q0.Leeftijd+Q1.Q25_1.Hours_Sleep_weekA.A
Weeknight sleep: 7-8.5h	-0.131828	0.0415256	-3.17461	0.00151543	0.0144555	{1.0: 2318, 0.0: 725}	rag_shannon ~lib_size+read_conc_norm+run20201009_isala_cross_1+run20201016_isala_cross_2+run20201023_isala_cross_3+run20201030_isala_cross_4+run20201106_isala_cross_5+run20201120_isala_cross_6+run20201204_isala_cross_8+run20201211_isala_cross_9+run20210119_isala_cross_7+Q0.Leeftijd+Q1.Q25_1.Hours_Sleep_weekB
Weeknight sleep: >9h	0.0584925	0.0773469	0.756237	0.449566	0.706061	{0.0: 2875, 1.0: 168}	rag_shannon ~lib_size+read_conc_norm+run20201009_isala_cross_1+run20201016_isala_cross_2+run20201023_isala_cross_3+run20201030_isala_cross_4+run20201106_isala_cross_5+run20201120_isala_cross_6+run20201204_isala_cross_8+run20201211_isala_cross_9+run20210119_isala_cross_7+Q0.Leeftijd+Q1.Q25_1.Hours_Sleep_weekC
Weekend sleep: <7h	0.151584	0.0960923	1.57748	0.114789	0.347311	{0.0: 2936, 1.0: 107}	rag_shannon ~lib_size+read_conc_norm+run20201009_isala_cross_1+run20201016_isala_cross_2+run20201023_isala_cross_3+run20201030_isala_cross_4+run20201106_isala_cross_5+run20201120_isala_cross_6+run20201204_isala_cross_8+run20201211_isala_cross_9+run20210119_isala_cross_7+Q0.Leeftijd+Q1.Q25_2.Hours_Sleep_weekendA
Weekend sleep: 7-8.5h	0.0274754	0.0361562	0.759909	0.447368	0.706061	{1.0: 1701, 0.0: 1342}	rag_shannon ~lib_size+read_conc_norm+run20201009_isala_cross_1+run20201016_isala_cross_2+run20201023_isala_cross_3+run20201030_isala_cross_4+run20201106_isala_cross_5+run20201120_isala_cross_6+run20201204_isala_cross_8+run20201211_isala_cross_9+run20210119_isala_cross_7+Q0.Leeftijd+Q1.Q25_2.Hours_Sleep_weekendB
Weekend sleep: >9h	-0.0487202	0.036803	-1.32381	0.185665	0.457023	{0.0: 1810, 1.0: 1233}	rag_shannon ~lib_size+read_conc_norm+run20201009_isala_cross_1+run20201016_isala_cross_2+run20201023_isala_cross_3+run20201030_isala_cross_4+run20201106_isala_cross_5+run20201120_isala_cross_6+run20201204_isala_cross_8+run20201211_isala_cross_9+run20210119_isala_cross_7+Q0.Leeftijd+Q1.Q25_2.Hours_Sleep_weekendC
Weekend sleep: >9hA	-0.696536	0.688992	-1.01095	0.312122	0.634152	{0.0: 3041, 1.0: 2}	rag_shannon ~lib_size+read_conc_norm+run20201009_isala_cross_1+run20201016_isala_cross_2+run20201023_isala_cross_3+run20201030_isala_cross_4+run20201106_isala_cross_5+run20201120_isala_cross_6+run20201204_isala_cross_8+run20201211_isala_cross_9+run20210119_isala_cross_7+Q0.Leeftijd+Q1.Q25_2.Hours_Sleep_weekendC.A
Wipe direction: Front to back	0.0336305	0.0355048	0.947211	0.343607	0.651367	{0.0: 1589, 1.0: 1440, nan: 1, nan: 1, nan: 1, nan: 1, nan: 1, nan: 1, nan: 1, nan: 1, nan: 1, nan: 1, nan: 1, nan: 1, nan: 1, nan: 1}	rag_shannon ~lib_size+read_conc_norm+run20201009_isala_cross_1+run20201016_isala_cross_2+run20201023_isala_cross_3+run20201030_isala_cross_4+run20201106_isala_cross_5+run20201120_isala_cross_6+run20201204_isala_cross_8+run20201211_isala_cross_9+run20210119_isala_cross_7+Q0.Leeftijd+Q2.Q33.Wipe_directionA
Wipe direction: Back to front	-0.0121791	0.0385476	-0.315949	0.752063	0.906015	{1.0: 916, 0.0: 2113, nan: 1, nan: 1, nan: 1, nan: 1, nan: 1, nan: 1, nan: 1, nan: 1, nan: 1, nan: 1, nan: 1, nan: 1, nan: 1, nan: 1}	rag_shannon ~lib_size+read_conc_norm+run20201009_isala_cross_1+run20201016_isala_cross_2+run20201023_isala_cross_3+run20201030_isala_cross_4+run20201106_isala_cross_5+run20201120_isala_cross_6+run20201204_isala_cross_8+run20201211_isala_cross_9+run20210119_isala_cross_7+Q0.Leeftijd+Q2.Q33.Wipe_directionB
Wipe direction: Both directions	-0.0604195	0.0448149	-1.3482	0.177695	0.450138	{0.0: 2446, 1.0: 583, nan: 1, nan: 1, nan: 1, nan: 1, nan: 1, nan: 1, nan: 1, nan: 1, nan: 1, nan: 1, nan: 1, nan: 1, nan: 1, nan: 1}	rag_shannon ~lib_size+read_conc_norm+run20201009_isala_cross_1+run20201016_isala_cross_2+run20201023_isala_cross_3+run20201030_isala_cross_4+run20201106_isala_cross_5+run20201120_isala_cross_6+run20201204_isala_cross_8+run20201211_isala_cross_9+run20210119_isala_cross_7+Q0.Leeftijd+Q2.Q33.Wipe_directionC
Wipe direction: No wipe	0.461443	0.270433	1.70631	0.0880529	0.296599	{0.0: 3016, nan: 1, 1.0: 13, nan: 1, nan: 1, nan: 1, nan: 1, nan: 1, nan: 1, nan: 1, nan: 1, nan: 1, nan: 1, nan: 1, nan: 1, nan: 1}	rag_shannon ~lib_size+read_conc_norm+run20201009_isala_cross_1+run20201016_isala_cross_2+run20201023_isala_cross_3+run20201030_isala_cross_4+run20201106_isala_cross_5+run20201120_isala_cross_6+run20201204_isala_cross_8+run20201211_isala_cross_9+run20210119_isala_cross_7+Q0.Leeftijd+Q2.Q33.Wipe_directionD
Wipe direction: Other	0.0667285	0.11233	0.59404	0.55253	0.768567	{0.0: 2952, 1.0: 77, nan: 1, nan: 1, nan: 1, nan: 1, nan: 1, nan: 1, nan: 1, nan: 1, nan: 1, nan: 1, nan: 1, nan: 1, nan: 1, nan: 1}	rag_shannon ~lib_size+read_conc_norm+run20201009_isala_cross_1+run20201016_isala_cross_2+run20201023_isala_cross_3+run20201030_isala_cross_4+run20201106_isala_cross_5+run20201120_isala_cross_6+run20201204_isala_cross_8+run20201211_isala_cross_9+run20210119_isala_cross_7+Q0.Leeftijd+Q2.Q33.Wipe_directionE

## Sheet: RA
effect	taxa_g	Estimate	Std. Error	t value	Pr(>|t|)	qvalue	n	formula
BMI	Lactobacillus crispatus group	-0.0782745	0.0773802	-1.01156	0.311831	0.634716	3041	t34 ~lib_size+read_conc_norm+run20201009_isala_cross_1+run20201016_isala_cross_2+run20201023_isala_cross_3+run20201030_isala_cross_4+run20201106_isala_cross_5+run20201120_isala_cross_6+run20201204_isala_cross_8+run20201211_isala_cross_9+run20210119_isala_cross_7+Q0.Leeftijd+Q2.BMI
BMI	Lactobacillus iners group	-0.311085	0.0910047	-3.41834	0.000638357	0.0115649	3041	t22 ~lib_size+read_conc_norm+run20201009_isala_cross_1+run20201016_isala_cross_2+run20201023_isala_cross_3+run20201030_isala_cross_4+run20201106_isala_cross_5+run20201120_isala_cross_6+run20201204_isala_cross_8+run20201211_isala_cross_9+run20210119_isala_cross_7+Q0.Leeftijd+Q2.BMI
BMI	Gardnerella	0.0116486	0.0865529	0.134584	0.89295	0.964537	3041	t251 ~lib_size+read_conc_norm+run20201009_isala_cross_1+run20201016_isala_cross_2+run20201023_isala_cross_3+run20201030_isala_cross_4+run20201106_isala_cross_5+run20201120_isala_cross_6+run20201204_isala_cross_8+run20201211_isala_cross_9+run20210119_isala_cross_7+Q0.Leeftijd+Q2.BMI
BMI	Prevotella	0.495756	0.0590031	8.4022	6.64685e-17	1.36127e-14	3041	t35 ~lib_size+read_conc_norm+run20201009_isala_cross_1+run20201016_isala_cross_2+run20201023_isala_cross_3+run20201030_isala_cross_4+run20201106_isala_cross_5+run20201120_isala_cross_6+run20201204_isala_cross_8+run20201211_isala_cross_9+run20210119_isala_cross_7+Q0.Leeftijd+Q2.BMI
BMI	Lactobacillus jensenii group	-0.17099	0.0856667	-1.99599	0.0460246	0.231485	3041	t223 ~lib_size+read_conc_norm+run20201009_isala_cross_1+run20201016_isala_cross_2+run20201023_isala_cross_3+run20201030_isala_cross_4+run20201106_isala_cross_5+run20201120_isala_cross_6+run20201204_isala_cross_8+run20201211_isala_cross_9+run20210119_isala_cross_7+Q0.Leeftijd+Q2.BMI
BMI	Lactobacillus gasseri group	0.291772	0.0710053	4.10916	4.07638e-05	0.00127945	3041	t495 ~lib_size+read_conc_norm+run20201009_isala_cross_1+run20201016_isala_cross_2+run20201023_isala_cross_3+run20201030_isala_cross_4+run20201106_isala_cross_5+run20201120_isala_cross_6+run20201204_isala_cross_8+run20201211_isala_cross_9+run20210119_isala_cross_7+Q0.Leeftijd+Q2.BMI
BMI	Bifidobacterium	0.192241	0.0514263	3.73818	0.000188787	0.00441869	3041	t272 ~lib_size+read_conc_norm+run20201009_isala_cross_1+run20201016_isala_cross_2+run20201023_isala_cross_3+run20201030_isala_cross_4+run20201106_isala_cross_5+run20201120_isala_cross_6+run20201204_isala_cross_8+run20201211_isala_cross_9+run20210119_isala_cross_7+Q0.Leeftijd+Q2.BMI
BMI	Anaerococcus	0.589728	0.0561092	10.5104	2.10694e-25	1.0153e-22	3041	t123 ~lib_size+read_conc_norm+run20201009_isala_cross_1+run20201016_isala_cross_2+run20201023_isala_cross_3+run20201030_isala_cross_4+run20201106_isala_cross_5+run20201120_isala_cross_6+run20201204_isala_cross_8+run20201211_isala_cross_9+run20210119_isala_cross_7+Q0.Leeftijd+Q2.BMI
BMI	Finegoldia	0.504054	0.0483466	10.4258	4.98654e-25	2.26943e-22	3041	t472 ~lib_size+read_conc_norm+run20201009_isala_cross_1+run20201016_isala_cross_2+run20201023_isala_cross_3+run20201030_isala_cross_4+run20201106_isala_cross_5+run20201120_isala_cross_6+run20201204_isala_cross_8+run20201211_isala_cross_9+run20210119_isala_cross_7+Q0.Leeftijd+Q2.BMI
BMI	Limosilactobacillus	-0.107266	0.069893	-1.53471	0.12496	0.397696	3041	t433 ~lib_size+read_conc_norm+run20201009_isala_cross_1+run20201016_isala_cross_2+run20201023_isala_cross_3+run20201030_isala_cross_4+run20201106_isala_cross_5+run20201120_isala_cross_6+run20201204_isala_cross_8+run20201211_isala_cross_9+run20210119_isala_cross_7+Q0.Leeftijd+Q2.BMI
BMI	Clostridium	0.202187	0.0535531	3.77546	0.000162781	0.00395484	3041	t444 ~lib_size+read_conc_norm+run20201009_isala_cross_1+run20201016_isala_cross_2+run20201023_isala_cross_3+run20201030_isala_cross_4+run20201106_isala_cross_5+run20201120_isala_cross_6+run20201204_isala_cross_8+run20201211_isala_cross_9+run20210119_isala_cross_7+Q0.Leeftijd+Q2.BMI
BMI	Streptococcus	0.213334	0.0669574	3.18612	0.00145662	0.0225901	3041	t11 ~lib_size+read_conc_norm+run20201009_isala_cross_1+run20201016_isala_cross_2+run20201023_isala_cross_3+run20201030_isala_cross_4+run20201106_isala_cross_5+run20201120_isala_cross_6+run20201204_isala_cross_8+run20201211_isala_cross_9+run20210119_isala_cross_7+Q0.Leeftijd+Q2.BMI
BMI	eigen_AV	1.84935	0.11918	15.5173	2.59978e-52	7.09912e-49	3041	eigen_AV ~lib_size+read_conc_norm+run20201009_isala_cross_1+run20201016_isala_cross_2+run20201023_isala_cross_3+run20201030_isala_cross_4+run20201106_isala_cross_5+run20201120_isala_cross_6+run20201204_isala_cross_8+run20201211_isala_cross_9+run20210119_isala_cross_7+Q0.Leeftijd+Q2.BMI
BMI	eigen_BV	0.231768	0.113692	2.03856	0.041581	0.218622	3041	eigen_BV ~lib_size+read_conc_norm+run20201009_isala_cross_1+run20201016_isala_cross_2+run20201023_isala_cross_3+run20201030_isala_cross_4+run20201106_isala_cross_5+run20201120_isala_cross_6+run20201204_isala_cross_8+run20201211_isala_cross_9+run20210119_isala_cross_7+Q0.Leeftijd+Q2.BMI
BMI	eigen_Gut	0.128689	0.0477445	2.69538	0.00706977	0.0685391	3041	eigen_Gut ~lib_size+read_conc_norm+run20201009_isala_cross_1+run20201016_isala_cross_2+run20201023_isala_cross_3+run20201030_isala_cross_4+run20201106_isala_cross_5+run20201120_isala_cross_6+run20201204_isala_cross_8+run20201211_isala_cross_9+run20210119_isala_cross_7+Q0.Leeftijd+Q2.BMI
BMI	eigen_Lacto	-0.213767	0.0949765	-2.25074	0.0244736	0.156876	3041	eigen_Lacto ~lib_size+read_conc_norm+run20201009_isala_cross_1+run20201016_isala_cross_2+run20201023_isala_cross_3+run20201030_isala_cross_4+run20201106_isala_cross_5+run20201120_isala_cross_6+run20201204_isala_cross_8+run20201211_isala_cross_9+run20210119_isala_cross_7+Q0.Leeftijd+Q2.BMI
Has children	Lactobacillus crispatus group	-1.57818	0.192818	-8.18481	3.97117e-16	7.39359e-14	{True: 1130, False: 1913}	t34 ~lib_size+read_conc_norm+run20201009_isala_cross_1+run20201016_isala_cross_2+run20201023_isala_cross_3+run20201030_isala_cross_4+run20201106_isala_cross_5+run20201120_isala_cross_6+run20201204_isala_cross_8+run20201211_isala_cross_9+run20210119_isala_cross_7+Q0.Leeftijd+Q1.Q6.Has_children
Has children	Lactobacillus iners group	0.18377	0.229579	0.800466	0.423504	0.72293	{True: 1130, False: 1913}	t22 ~lib_size+read_conc_norm+run20201009_isala_cross_1+run20201016_isala_cross_2+run20201023_isala_cross_3+run20201030_isala_cross_4+run20201106_isala_cross_5+run20201120_isala_cross_6+run20201204_isala_cross_8+run20201211_isala_cross_9+run20210119_isala_cross_7+Q0.Leeftijd+Q1.Q6.Has_children
Has children	Gardnerella	0.474968	0.217756	2.18119	0.0292459	0.174115	{True: 1130, False: 1913}	t251 ~lib_size+read_conc_norm+run20201009_isala_cross_1+run20201016_isala_cross_2+run20201023_isala_cross_3+run20201030_isala_cross_4+run20201106_isala_cross_5+run20201120_isala_cross_6+run20201204_isala_cross_8+run20201211_isala_cross_9+run20210119_isala_cross_7+Q0.Leeftijd+Q1.Q6.Has_children
Has children	Prevotella	0.120985	0.150281	0.805059	0.420849	0.720801	{True: 1130, False: 1913}	t35 ~lib_size+read_conc_norm+run20201009_isala_cross_1+run20201016_isala_cross_2+run20201023_isala_cross_3+run20201030_isala_cross_4+run20201106_isala_cross_5+run20201120_isala_cross_6+run20201204_isala_cross_8+run20201211_isala_cross_9+run20210119_isala_cross_7+Q0.Leeftijd+Q1.Q6.Has_children
Has children	Lactobacillus jensenii group	-1.38195	0.214337	-6.44756	1.31804e-10	1.68709e-08	{True: 1130, False: 1913}	t223 ~lib_size+read_conc_norm+run20201009_isala_cross_1+run20201016_isala_cross_2+run20201023_isala_cross_3+run20201030_isala_cross_4+run20201106_isala_cross_5+run20201120_isala_cross_6+run20201204_isala_cross_8+run20201211_isala_cross_9+run20210119_isala_cross_7+Q0.Leeftijd+Q1.Q6.Has_children
Has children	Lactobacillus gasseri group	0.841568	0.178559	4.71311	2.54972e-06	0.000133893	{True: 1130, False: 1913}	t495 ~lib_size+read_conc_norm+run20201009_isala_cross_1+run20201016_isala_cross_2+run20201023_isala_cross_3+run20201030_isala_cross_4+run20201106_isala_cross_5+run20201120_isala_cross_6+run20201204_isala_cross_8+run20201211_isala_cross_9+run20210119_isala_cross_7+Q0.Leeftijd+Q1.Q6.Has_children
Has children	Bifidobacterium	1.16478	0.127985	9.10085	1.5837e-19	4.63344e-17	{True: 1130, False: 1913}	t272 ~lib_size+read_conc_norm+run20201009_isala_cross_1+run20201016_isala_cross_2+run20201023_isala_cross_3+run20201030_isala_cross_4+run20201106_isala_cross_5+run20201120_isala_cross_6+run20201204_isala_cross_8+run20201211_isala_cross_9+run20210119_isala_cross_7+Q0.Leeftijd+Q1.Q6.Has_children
Has children	Anaerococcus	0.398564	0.14367	2.77416	0.00556835	0.059088	{True: 1130, False: 1913}	t123 ~lib_size+read_conc_norm+run20201009_isala_cross_1+run20201016_isala_cross_2+run20201023_isala_cross_3+run20201030_isala_cross_4+run20201106_isala_cross_5+run20201120_isala_cross_6+run20201204_isala_cross_8+run20201211_isala_cross_9+run20210119_isala_cross_7+Q0.Leeftijd+Q1.Q6.Has_children
Has children	Finegoldia	-0.123508	0.123823	-0.997454	0.318624	0.639815	{True: 1130, False: 1913}	t472 ~lib_size+read_conc_norm+run20201009_isala_cross_1+run20201016_isala_cross_2+run20201023_isala_cross_3+run20201030_isala_cross_4+run20201106_isala_cross_5+run20201120_isala_cross_6+run20201204_isala_cross_8+run20201211_isala_cross_9+run20210119_isala_cross_7+Q0.Leeftijd+Q1.Q6.Has_children
Has children	Limosilactobacillus	-1.09891	0.174858	-6.28456	3.75933e-10	4.66612e-08	{True: 1130, False: 1913}	t433 ~lib_size+read_conc_norm+run20201009_isala_cross_1+run20201016_isala_cross_2+run20201023_isala_cross_3+run20201030_isala_cross_4+run20201106_isala_cross_5+run20201120_isala_cross_6+run20201204_isala_cross_8+run20201211_isala_cross_9+run20210119_isala_cross_7+Q0.Leeftijd+Q1.Q6.Has_children
Has children	Clostridium	-0.0802409	0.135087	-0.593997	0.552559	0.807774	{True: 1130, False: 1913}	t444 ~lib_size+read_conc_norm+run20201009_isala_cross_1+run20201016_isala_cross_2+run20201023_isala_cross_3+run20201030_isala_cross_4+run20201106_isala_cross_5+run20201120_isala_cross_6+run20201204_isala_cross_8+run20201211_isala_cross_9+run20210119_isala_cross_7+Q0.Leeftijd+Q1.Q6.Has_children
Has children	Streptococcus	0.876687	0.168072	5.21614	1.94987e-07	1.36524e-05	{True: 1130, False: 1913}	t11 ~lib_size+read_conc_norm+run20201009_isala_cross_1+run20201016_isala_cross_2+run20201023_isala_cross_3+run20201030_isala_cross_4+run20201106_isala_cross_5+run20201120_isala_cross_6+run20201204_isala_cross_8+run20201211_isala_cross_9+run20210119_isala_cross_7+Q0.Leeftijd+Q1.Q6.Has_children
Has children	eigen_AV	0.227671	0.311623	0.730597	0.465082	0.751766	{True: 1130, False: 1913}	eigen_AV ~lib_size+read_conc_norm+run20201009_isala_cross_1+run20201016_isala_cross_2+run20201023_isala_cross_3+run20201030_isala_cross_4+run20201106_isala_cross_5+run20201120_isala_cross_6+run20201204_isala_cross_8+run20201211_isala_cross_9+run20210119_isala_cross_7+Q0.Leeftijd+Q1.Q6.Has_children
Has children	eigen_BV	0.488066	0.286491	1.7036	0.0885577	0.328617	{True: 1130, False: 1913}	eigen_BV ~lib_size+read_conc_norm+run20201009_isala_cross_1+run20201016_isala_cross_2+run20201023_isala_cross_3+run20201030_isala_cross_4+run20201106_isala_cross_5+run20201120_isala_cross_6+run20201204_isala_cross_8+run20201211_isala_cross_9+run20210119_isala_cross_7+Q0.Leeftijd+Q1.Q6.Has_children
Has children	eigen_Gut	-0.253312	0.120208	-2.10728	0.0351754	0.19653	{True: 1130, False: 1913}	eigen_Gut ~lib_size+read_conc_norm+run20201009_isala_cross_1+run20201016_isala_cross_2+run20201023_isala_cross_3+run20201030_isala_cross_4+run20201106_isala_cross_5+run20201120_isala_cross_6+run20201204_isala_cross_8+run20201211_isala_cross_9+run20210119_isala_cross_7+Q0.Leeftijd+Q1.Q6.Has_children
Has children	eigen_Lacto	-2.31378	0.235686	-9.81718	2.04296e-22	7.27647e-20	{True: 1130, False: 1913}	eigen_Lacto ~lib_size+read_conc_norm+run20201009_isala_cross_1+run20201016_isala_cross_2+run20201023_isala_cross_3+run20201030_isala_cross_4+run20201106_isala_cross_5+run20201120_isala_cross_6+run20201204_isala_cross_8+run20201211_isala_cross_9+run20210119_isala_cross_7+Q0.Leeftijd+Q1.Q6.Has_children
Contraceptive: Progestogen pill	Lactobacillus crispatus group	-0.765406	0.481886	-1.58836	0.11231	0.373652	{False: 2965, True: 78}	t34 ~lib_size+read_conc_norm+run20201009_isala_cross_1+run20201016_isala_cross_2+run20201023_isala_cross_3+run20201030_isala_cross_4+run20201106_isala_cross_5+run20201120_isala_cross_6+run20201204_isala_cross_8+run20201211_isala_cross_9+run20210119_isala_cross_7+Q0.Leeftijd+Q2.Q25.Pill_progestogen
Contraceptive: Progestogen pill	Lactobacillus iners group	0.213412	0.567801	0.375857	0.70705	0.884973	{False: 2965, True: 78}	t22 ~lib_size+read_conc_norm+run20201009_isala_cross_1+run20201016_isala_cross_2+run20201023_isala_cross_3+run20201030_isala_cross_4+run20201106_isala_cross_5+run20201120_isala_cross_6+run20201204_isala_cross_8+run20201211_isala_cross_9+run20210119_isala_cross_7+Q0.Leeftijd+Q2.Q25.Pill_progestogen
Contraceptive: Progestogen pill	Gardnerella	0.38531	0.538893	0.715003	0.474662	0.758423	{False: 2965, True: 78}	t251 ~lib_size+read_conc_norm+run20201009_isala_cross_1+run20201016_isala_cross_2+run20201023_isala_cross_3+run20201030_isala_cross_4+run20201106_isala_cross_5+run20201120_isala_cross_6+run20201204_isala_cross_8+run20201211_isala_cross_9+run20210119_isala_cross_7+Q0.Leeftijd+Q2.Q25.Pill_progestogen
Contraceptive: Progestogen pill	Prevotella	0.505637	0.371574	1.3608	0.173679	0.472206	{False: 2965, True: 78}	t35 ~lib_size+read_conc_norm+run20201009_isala_cross_1+run20201016_isala_cross_2+run20201023_isala_cross_3+run20201030_isala_cross_4+run20201106_isala_cross_5+run20201120_isala_cross_6+run20201204_isala_cross_8+run20201211_isala_cross_9+run20210119_isala_cross_7+Q0.Leeftijd+Q2.Q25.Pill_progestogen
Contraceptive: Progestogen pill	Lactobacillus jensenii group	-1.02568	0.533358	-1.92306	0.0545656	0.256386	{False: 2965, True: 78}	t223 ~lib_size+read_conc_norm+run20201009_isala_cross_1+run20201016_isala_cross_2+run20201023_isala_cross_3+run20201030_isala_cross_4+run20201106_isala_cross_5+run20201120_isala_cross_6+run20201204_isala_cross_8+run20201211_isala_cross_9+run20210119_isala_cross_7+Q0.Leeftijd+Q2.Q25.Pill_progestogen
Contraceptive: Progestogen pill	Lactobacillus gasseri group	0.00197609	0.443196	0.00445872	0.996443	0.9992	{False: 2965, True: 78}	t495 ~lib_size+read_conc_norm+run20201009_isala_cross_1+run20201016_isala_cross_2+run20201023_isala_cross_3+run20201030_isala_cross_4+run20201106_isala_cross_5+run20201120_isala_cross_6+run20201204_isala_cross_8+run20201211_isala_cross_9+run20210119_isala_cross_7+Q0.Leeftijd+Q2.Q25.Pill_progestogen
Contraceptive: Progestogen pill	Bifidobacterium	0.611933	0.320615	1.90862	0.0564053	0.260176	{False: 2965, True: 78}	t272 ~lib_size+read_conc_norm+run20201009_isala_cross_1+run20201016_isala_cross_2+run20201023_isala_cross_3+run20201030_isala_cross_4+run20201106_isala_cross_5+run20201120_isala_cross_6+run20201204_isala_cross_8+run20201211_isala_cross_9+run20210119_isala_cross_7+Q0.Leeftijd+Q2.Q25.Pill_progestogen
Contraceptive: Progestogen pill	Anaerococcus	0.627483	0.355567	1.76474	0.0777083	0.307976	{False: 2965, True: 78}	t123 ~lib_size+read_conc_norm+run20201009_isala_cross_1+run20201016_isala_cross_2+run20201023_isala_cross_3+run20201030_isala_cross_4+run20201106_isala_cross_5+run20201120_isala_cross_6+run20201204_isala_cross_8+run20201211_isala_cross_9+run20210119_isala_cross_7+Q0.Leeftijd+Q2.Q25.Pill_progestogen
Contraceptive: Progestogen pill	Finegoldia	0.470989	0.306148	1.53844	0.124046	0.396018	{False: 2965, True: 78}	t472 ~lib_size+read_conc_norm+run20201009_isala_cross_1+run20201016_isala_cross_2+run20201023_isala_cross_3+run20201030_isala_cross_4+run20201106_isala_cross_5+run20201120_isala_cross_6+run20201204_isala_cross_8+run20201211_isala_cross_9+run20210119_isala_cross_7+Q0.Leeftijd+Q2.Q25.Pill_progestogen
Contraceptive: Progestogen pill	Limosilactobacillus	-0.723146	0.435038	-1.66226	0.0965644	0.345741	{False: 2965, True: 78}	t433 ~lib_size+read_conc_norm+run20201009_isala_cross_1+run20201016_isala_cross_2+run20201023_isala_cross_3+run20201030_isala_cross_4+run20201106_isala_cross_5+run20201120_isala_cross_6+run20201204_isala_cross_8+run20201211_isala_cross_9+run20210119_isala_cross_7+Q0.Leeftijd+Q2.Q25.Pill_progestogen
Contraceptive: Progestogen pill	Clostridium	0.308579	0.334044	0.923767	0.355681	0.671899	{False: 2965, True: 78}	t444 ~lib_size+read_conc_norm+run20201009_isala_cross_1+run20201016_isala_cross_2+run20201023_isala_cross_3+run20201030_isala_cross_4+run20201106_isala_cross_5+run20201120_isala_cross_6+run20201204_isala_cross_8+run20201211_isala_cross_9+run20210119_isala_cross_7+Q0.Leeftijd+Q2.Q25.Pill_progestogen
Contraceptive: Progestogen pill	Streptococcus	0.376139	0.417452	0.901037	0.367641	0.68207	{False: 2965, True: 78}	t11 ~lib_size+read_conc_norm+run20201009_isala_cross_1+run20201016_isala_cross_2+run20201023_isala_cross_3+run20201030_isala_cross_4+run20201106_isala_cross_5+run20201120_isala_cross_6+run20201204_isala_cross_8+run20201211_isala_cross_9+run20210119_isala_cross_7+Q0.Leeftijd+Q2.Q25.Pill_progestogen
Contraceptive: Progestogen pill	eigen_AV	2.41918	0.769464	3.14398	0.00168278	0.0252942	{False: 2965, True: 78}	eigen_AV ~lib_size+read_conc_norm+run20201009_isala_cross_1+run20201016_isala_cross_2+run20201023_isala_cross_3+run20201030_isala_cross_4+run20201106_isala_cross_5+run20201120_isala_cross_6+run20201204_isala_cross_8+run20201211_isala_cross_9+run20210119_isala_cross_7+Q0.Leeftijd+Q2.Q25.Pill_progestogen
Contraceptive: Progestogen pill	eigen_BV	0.653987	0.708737	0.922751	0.356211	0.672352	{False: 2965, True: 78}	eigen_BV ~lib_size+read_conc_norm+run20201009_isala_cross_1+run20201016_isala_cross_2+run20201023_isala_cross_3+run20201030_isala_cross_4+run20201106_isala_cross_5+run20201120_isala_cross_6+run20201204_isala_cross_8+run20201211_isala_cross_9+run20210119_isala_cross_7+Q0.Leeftijd+Q2.Q25.Pill_progestogen
Contraceptive: Progestogen pill	eigen_Gut	-0.0879538	0.297491	-0.295652	0.767516	0.91388	{False: 2965, True: 78}	eigen_Gut ~lib_size+read_conc_norm+run20201009_isala_cross_1+run20201016_isala_cross_2+run20201023_isala_cross_3+run20201030_isala_cross_4+run20201106_isala_cross_5+run20201120_isala_cross_6+run20201204_isala_cross_8+run20201211_isala_cross_9+run20210119_isala_cross_7+Q0.Leeftijd+Q2.Q25.Pill_progestogen
Contraceptive: Progestogen pill	eigen_Lacto	-1.46929	0.591452	-2.48421	0.0130376	0.104403	{False: 2965, True: 78}	eigen_Lacto ~lib_size+read_conc_norm+run20201009_isala_cross_1+run20201016_isala_cross_2+run20201023_isala_cross_3+run20201030_isala_cross_4+run20201106_isala_cross_5+run20201120_isala_cross_6+run20201204_isala_cross_8+run20201211_isala_cross_9+run20210119_isala_cross_7+Q0.Leeftijd+Q2.Q25.Pill_progestogen
Contraceptive: Combination pill	Lactobacillus crispatus group	0.145632	0.175417	0.830206	0.406488	0.711109	{False: 2124, True: 919}	t34 ~lib_size+read_conc_norm+run20201009_isala_cross_1+run20201016_isala_cross_2+run20201023_isala_cross_3+run20201030_isala_cross_4+run20201106_isala_cross_5+run20201120_isala_cross_6+run20201204_isala_cross_8+run20201211_isala_cross_9+run20210119_isala_cross_7+Q0.Leeftijd+Q2.Q25.Pill_combined
Contraceptive: Combination pill	Lactobacillus iners group	-0.33535	0.206545	-1.62362	0.104561	0.361268	{False: 2124, True: 919}	t22 ~lib_size+read_conc_norm+run20201009_isala_cross_1+run20201016_isala_cross_2+run20201023_isala_cross_3+run20201030_isala_cross_4+run20201106_isala_cross_5+run20201120_isala_cross_6+run20201204_isala_cross_8+run20201211_isala_cross_9+run20210119_isala_cross_7+Q0.Leeftijd+Q2.Q25.Pill_combined
Contraceptive: Combination pill	Gardnerella	-0.766893	0.195631	-3.9201	9.04714e-05	0.00241338	{False: 2124, True: 919}	t251 ~lib_size+read_conc_norm+run20201009_isala_cross_1+run20201016_isala_cross_2+run20201023_isala_cross_3+run20201030_isala_cross_4+run20201106_isala_cross_5+run20201120_isala_cross_6+run20201204_isala_cross_8+run20201211_isala_cross_9+run20210119_isala_cross_7+Q0.Leeftijd+Q2.Q25.Pill_combined
Contraceptive: Combination pill	Prevotella	-0.42167	0.135045	-3.12245	0.00181046	0.0265781	{False: 2124, True: 919}	t35 ~lib_size+read_conc_norm+run20201009_isala_cross_1+run20201016_isala_cross_2+run20201023_isala_cross_3+run20201030_isala_cross_4+run20201106_isala_cross_5+run20201120_isala_cross_6+run20201204_isala_cross_8+run20201211_isala_cross_9+run20210119_isala_cross_7+Q0.Leeftijd+Q2.Q25.Pill_combined
Contraceptive: Combination pill	Lactobacillus jensenii group	-0.215114	0.194175	-1.10784	0.268021	0.590389	{False: 2124, True: 919}	t223 ~lib_size+read_conc_norm+run20201009_isala_cross_1+run20201016_isala_cross_2+run20201023_isala_cross_3+run20201030_isala_cross_4+run20201106_isala_cross_5+run20201120_isala_cross_6+run20201204_isala_cross_8+run20201211_isala_cross_9+run20210119_isala_cross_7+Q0.Leeftijd+Q2.Q25.Pill_combined
Contraceptive: Combination pill	Lactobacillus gasseri group	-0.285756	0.161201	-1.77267	0.0763836	0.306006	{False: 2124, True: 919}	t495 ~lib_size+read_conc_norm+run20201009_isala_cross_1+run20201016_isala_cross_2+run20201023_isala_cross_3+run20201030_isala_cross_4+run20201106_isala_cross_5+run20201120_isala_cross_6+run20201204_isala_cross_8+run20201211_isala_cross_9+run20210119_isala_cross_7+Q0.Leeftijd+Q2.Q25.Pill_combined
Contraceptive: Combination pill	Bifidobacterium	-0.261363	0.116649	-2.24059	0.0251248	0.159429	{False: 2124, True: 919}	t272 ~lib_size+read_conc_norm+run20201009_isala_cross_1+run20201016_isala_cross_2+run20201023_isala_cross_3+run20201030_isala_cross_4+run20201106_isala_cross_5+run20201120_isala_cross_6+run20201204_isala_cross_8+run20201211_isala_cross_9+run20210119_isala_cross_7+Q0.Leeftijd+Q2.Q25.Pill_combined
Contraceptive: Combination pill	Anaerococcus	-0.0639855	0.129457	-0.494263	0.621157	0.842469	{False: 2124, True: 919}	t123 ~lib_size+read_conc_norm+run20201009_isala_cross_1+run20201016_isala_cross_2+run20201023_isala_cross_3+run20201030_isala_cross_4+run20201106_isala_cross_5+run20201120_isala_cross_6+run20201204_isala_cross_8+run20201211_isala_cross_9+run20210119_isala_cross_7+Q0.Leeftijd+Q2.Q25.Pill_combined
Contraceptive: Combination pill	Finegoldia	-0.198944	0.111396	-1.78592	0.0742125	0.301412	{False: 2124, True: 919}	t472 ~lib_size+read_conc_norm+run20201009_isala_cross_1+run20201016_isala_cross_2+run20201023_isala_cross_3+run20201030_isala_cross_4+run20201106_isala_cross_5+run20201120_isala_cross_6+run20201204_isala_cross_8+run20201211_isala_cross_9+run20210119_isala_cross_7+Q0.Leeftijd+Q2.Q25.Pill_combined
Contraceptive: Combination pill	Limosilactobacillus	-0.317024	0.158283	-2.00289	0.0452782	0.229372	{False: 2124, True: 919}	t433 ~lib_size+read_conc_norm+run20201009_isala_cross_1+run20201016_isala_cross_2+run20201023_isala_cross_3+run20201030_isala_cross_4+run20201106_isala_cross_5+run20201120_isala_cross_6+run20201204_isala_cross_8+run20201211_isala_cross_9+run20210119_isala_cross_7+Q0.Leeftijd+Q2.Q25.Pill_combined
Contraceptive: Combination pill	Clostridium	-0.135103	0.121555	-1.11146	0.26646	0.588524	{False: 2124, True: 919}	t444 ~lib_size+read_conc_norm+run20201009_isala_cross_1+run20201016_isala_cross_2+run20201023_isala_cross_3+run20201030_isala_cross_4+run20201106_isala_cross_5+run20201120_isala_cross_6+run20201204_isala_cross_8+run20201211_isala_cross_9+run20210119_isala_cross_7+Q0.Leeftijd+Q2.Q25.Pill_combined
Contraceptive: Combination pill	Streptococcus	-0.206806	0.15189	-1.36156	0.173439	0.471941	{False: 2124, True: 919}	t11 ~lib_size+read_conc_norm+run20201009_isala_cross_1+run20201016_isala_cross_2+run20201023_isala_cross_3+run20201030_isala_cross_4+run20201106_isala_cross_5+run20201120_isala_cross_6+run20201204_isala_cross_8+run20201211_isala_cross_9+run20210119_isala_cross_7+Q0.Leeftijd+Q2.Q25.Pill_combined
Contraceptive: Combination pill	eigen_AV	-0.000377922	0.280474	-0.00134744	0.998925	0.999914	{False: 2124, True: 919}	eigen_AV ~lib_size+read_conc_norm+run20201009_isala_cross_1+run20201016_isala_cross_2+run20201023_isala_cross_3+run20201030_isala_cross_4+run20201106_isala_cross_5+run20201120_isala_cross_6+run20201204_isala_cross_8+run20201211_isala_cross_9+run20210119_isala_cross_7+Q0.Leeftijd+Q2.Q25.Pill_combined
Contraceptive: Combination pill	eigen_BV	-1.03322	0.257271	-4.01607	6.06134e-05	0.00177973	{False: 2124, True: 919}	eigen_BV ~lib_size+read_conc_norm+run20201009_isala_cross_1+run20201016_isala_cross_2+run20201023_isala_cross_3+run20201030_isala_cross_4+run20201106_isala_cross_5+run20201120_isala_cross_6+run20201204_isala_cross_8+run20201211_isala_cross_9+run20210119_isala_cross_7+Q0.Leeftijd+Q2.Q25.Pill_combined
Contraceptive: Combination pill	eigen_Gut	0.436545	0.107971	4.04316	5.40497e-05	0.00161009	{False: 2124, True: 919}	eigen_Gut ~lib_size+read_conc_norm+run20201009_isala_cross_1+run20201016_isala_cross_2+run20201023_isala_cross_3+run20201030_isala_cross_4+run20201106_isala_cross_5+run20201120_isala_cross_6+run20201204_isala_cross_8+run20201211_isala_cross_9+run20210119_isala_cross_7+Q0.Leeftijd+Q2.Q25.Pill_combined
Contraceptive: Combination pill	eigen_Lacto	-0.240316	0.215412	-1.11561	0.264676	0.586801	{False: 2124, True: 919}	eigen_Lacto ~lib_size+read_conc_norm+run20201009_isala_cross_1+run20201016_isala_cross_2+run20201023_isala_cross_3+run20201030_isala_cross_4+run20201106_isala_cross_5+run20201120_isala_cross_6+run20201204_isala_cross_8+run20201211_isala_cross_9+run20210119_isala_cross_7+Q0.Leeftijd+Q2.Q25.Pill_combined
Contraceptive: Copper spiral	Lactobacillus crispatus group	0.158293	0.403042	0.392746	0.694534	0.880387	{False: 2930, True: 113}	t34 ~lib_size+read_conc_norm+run20201009_isala_cross_1+run20201016_isala_cross_2+run20201023_isala_cross_3+run20201030_isala_cross_4+run20201106_isala_cross_5+run20201120_isala_cross_6+run20201204_isala_cross_8+run20201211_isala_cross_9+run20210119_isala_cross_7+Q0.Leeftijd+Q2.Q25.Spiral_copper
Contraceptive: Copper spiral	Lactobacillus iners group	0.793389	0.474507	1.67203	0.094622	0.342798	{False: 2930, True: 113}	t22 ~lib_size+read_conc_norm+run20201009_isala_cross_1+run20201016_isala_cross_2+run20201023_isala_cross_3+run20201030_isala_cross_4+run20201106_isala_cross_5+run20201120_isala_cross_6+run20201204_isala_cross_8+run20201211_isala_cross_9+run20210119_isala_cross_7+Q0.Leeftijd+Q2.Q25.Spiral_copper
Contraceptive: Copper spiral	Gardnerella	0.157859	0.450575	0.350349	0.726101	0.895089	{False: 2930, True: 113}	t251 ~lib_size+read_conc_norm+run20201009_isala_cross_1+run20201016_isala_cross_2+run20201023_isala_cross_3+run20201030_isala_cross_4+run20201106_isala_cross_5+run20201120_isala_cross_6+run20201204_isala_cross_8+run20201211_isala_cross_9+run20210119_isala_cross_7+Q0.Leeftijd+Q2.Q25.Spiral_copper
Contraceptive: Copper spiral	Prevotella	0.309296	0.310702	0.995476	0.319584	0.63998	{False: 2930, True: 113}	t35 ~lib_size+read_conc_norm+run20201009_isala_cross_1+run20201016_isala_cross_2+run20201023_isala_cross_3+run20201030_isala_cross_4+run20201106_isala_cross_5+run20201120_isala_cross_6+run20201204_isala_cross_8+run20201211_isala_cross_9+run20210119_isala_cross_7+Q0.Leeftijd+Q2.Q25.Spiral_copper
Contraceptive: Copper spiral	Lactobacillus jensenii group	0.645923	0.446037	1.44814	0.147681	0.436116	{False: 2930, True: 113}	t223 ~lib_size+read_conc_norm+run20201009_isala_cross_1+run20201016_isala_cross_2+run20201023_isala_cross_3+run20201030_isala_cross_4+run20201106_isala_cross_5+run20201120_isala_cross_6+run20201204_isala_cross_8+run20201211_isala_cross_9+run20210119_isala_cross_7+Q0.Leeftijd+Q2.Q25.Spiral_copper
Contraceptive: Copper spiral	Lactobacillus gasseri group	-0.167494	0.370525	-0.452044	0.65127	0.857888	{False: 2930, True: 113}	t495 ~lib_size+read_conc_norm+run20201009_isala_cross_1+run20201016_isala_cross_2+run20201023_isala_cross_3+run20201030_isala_cross_4+run20201106_isala_cross_5+run20201120_isala_cross_6+run20201204_isala_cross_8+run20201211_isala_cross_9+run20210119_isala_cross_7+Q0.Leeftijd+Q2.Q25.Spiral_copper
Contraceptive: Copper spiral	Bifidobacterium	-0.1968	0.26819	-0.733809	0.463122	0.751016	{False: 2930, True: 113}	t272 ~lib_size+read_conc_norm+run20201009_isala_cross_1+run20201016_isala_cross_2+run20201023_isala_cross_3+run20201030_isala_cross_4+run20201106_isala_cross_5+run20201120_isala_cross_6+run20201204_isala_cross_8+run20201211_isala_cross_9+run20210119_isala_cross_7+Q0.Leeftijd+Q2.Q25.Spiral_copper
Contraceptive: Copper spiral	Anaerococcus	0.0373979	0.297427	0.125738	0.899948	0.966926	{False: 2930, True: 113}	t123 ~lib_size+read_conc_norm+run20201009_isala_cross_1+run20201016_isala_cross_2+run20201023_isala_cross_3+run20201030_isala_cross_4+run20201106_isala_cross_5+run20201120_isala_cross_6+run20201204_isala_cross_8+run20201211_isala_cross_9+run20210119_isala_cross_7+Q0.Leeftijd+Q2.Q25.Spiral_copper
Contraceptive: Copper spiral	Finegoldia	0.0025745	0.256057	0.0100544	0.991979	0.998717	{False: 2930, True: 113}	t472 ~lib_size+read_conc_norm+run20201009_isala_cross_1+run20201016_isala_cross_2+run20201023_isala_cross_3+run20201030_isala_cross_4+run20201106_isala_cross_5+run20201120_isala_cross_6+run20201204_isala_cross_8+run20201211_isala_cross_9+run20210119_isala_cross_7+Q0.Leeftijd+Q2.Q25.Spiral_copper
Contraceptive: Copper spiral	Limosilactobacillus	0.789723	0.3636	2.17195	0.0299365	0.177325	{False: 2930, True: 113}	t433 ~lib_size+read_conc_norm+run20201009_isala_cross_1+run20201016_isala_cross_2+run20201023_isala_cross_3+run20201030_isala_cross_4+run20201106_isala_cross_5+run20201120_isala_cross_6+run20201204_isala_cross_8+run20201211_isala_cross_9+run20210119_isala_cross_7+Q0.Leeftijd+Q2.Q25.Spiral_copper
Contraceptive: Copper spiral	Clostridium	-0.326905	0.279257	-1.17062	0.241842	0.557918	{False: 2930, True: 113}	t444 ~lib_size+read_conc_norm+run20201009_isala_cross_1+run20201016_isala_cross_2+run20201023_isala_cross_3+run20201030_isala_cross_4+run20201106_isala_cross_5+run20201120_isala_cross_6+run20201204_isala_cross_8+run20201211_isala_cross_9+run20210119_isala_cross_7+Q0.Leeftijd+Q2.Q25.Spiral_copper
Contraceptive: Copper spiral	Streptococcus	0.243708	0.349033	0.698237	0.485082	0.766962	{False: 2930, True: 113}	t11 ~lib_size+read_conc_norm+run20201009_isala_cross_1+run20201016_isala_cross_2+run20201023_isala_cross_3+run20201030_isala_cross_4+run20201106_isala_cross_5+run20201120_isala_cross_6+run20201204_isala_cross_8+run20201211_isala_cross_9+run20210119_isala_cross_7+Q0.Leeftijd+Q2.Q25.Spiral_copper
Contraceptive: Copper spiral	eigen_AV	-0.555008	0.644286	-0.86143	0.389069	0.698653	{False: 2930, True: 113}	eigen_AV ~lib_size+read_conc_norm+run20201009_isala_cross_1+run20201016_isala_cross_2+run20201023_isala_cross_3+run20201030_isala_cross_4+run20201106_isala_cross_5+run20201120_isala_cross_6+run20201204_isala_cross_8+run20201211_isala_cross_9+run20210119_isala_cross_7+Q0.Leeftijd+Q2.Q25.Spiral_copper
Contraceptive: Copper spiral	eigen_BV	0.702278	0.592491	1.1853	0.235993	0.5522	{False: 2930, True: 113}	eigen_BV ~lib_size+read_conc_norm+run20201009_isala_cross_1+run20201016_isala_cross_2+run20201023_isala_cross_3+run20201030_isala_cross_4+run20201106_isala_cross_5+run20201120_isala_cross_6+run20201204_isala_cross_8+run20201211_isala_cross_9+run20210119_isala_cross_7+Q0.Leeftijd+Q2.Q25.Spiral_copper
Contraceptive: Copper spiral	eigen_Gut	-0.130667	0.248712	-0.525373	0.599363	0.834888	{False: 2930, True: 113}	eigen_Gut ~lib_size+read_conc_norm+run20201009_isala_cross_1+run20201016_isala_cross_2+run20201023_isala_cross_3+run20201030_isala_cross_4+run20201106_isala_cross_5+run20201120_isala_cross_6+run20201204_isala_cross_8+run20201211_isala_cross_9+run20210119_isala_cross_7+Q0.Leeftijd+Q2.Q25.Spiral_copper
Contraceptive: Copper spiral	eigen_Lacto	0.934424	0.494701	1.88887	0.059005	0.267202	{False: 2930, True: 113}	eigen_Lacto ~lib_size+read_conc_norm+run20201009_isala_cross_1+run20201016_isala_cross_2+run20201023_isala_cross_3+run20201030_isala_cross_4+run20201106_isala_cross_5+run20201120_isala_cross_6+run20201204_isala_cross_8+run20201211_isala_cross_9+run20210119_isala_cross_7+Q0.Leeftijd+Q2.Q25.Spiral_copper
Contraceptive: Hormonal spiral	Lactobacillus crispatus group	0.111664	0.190827	0.585156	0.558486	0.812045	{True: 605, False: 2438}	t34 ~lib_size+read_conc_norm+run20201009_isala_cross_1+run20201016_isala_cross_2+run20201023_isala_cross_3+run20201030_isala_cross_4+run20201106_isala_cross_5+run20201120_isala_cross_6+run20201204_isala_cross_8+run20201211_isala_cross_9+run20210119_isala_cross_7+Q0.Leeftijd+Q2.Q25.Spiral_hormone
Contraceptive: Hormonal spiral	Lactobacillus iners group	0.371313	0.224673	1.65268	0.098499	0.348659	{True: 605, False: 2438}	t22 ~lib_size+read_conc_norm+run20201009_isala_cross_1+run20201016_isala_cross_2+run20201023_isala_cross_3+run20201030_isala_cross_4+run20201106_isala_cross_5+run20201120_isala_cross_6+run20201204_isala_cross_8+run20201211_isala_cross_9+run20210119_isala_cross_7+Q0.Leeftijd+Q2.Q25.Spiral_hormone
Contraceptive: Hormonal spiral	Gardnerella	0.75982	0.212897	3.56896	0.000363956	0.00742493	{True: 605, False: 2438}	t251 ~lib_size+read_conc_norm+run20201009_isala_cross_1+run20201016_isala_cross_2+run20201023_isala_cross_3+run20201030_isala_cross_4+run20201106_isala_cross_5+run20201120_isala_cross_6+run20201204_isala_cross_8+run20201211_isala_cross_9+run20210119_isala_cross_7+Q0.Leeftijd+Q2.Q25.Spiral_hormone
Contraceptive: Hormonal spiral	Prevotella	0.176912	0.147101	1.20266	0.229204	0.544558	{True: 605, False: 2438}	t35 ~lib_size+read_conc_norm+run20201009_isala_cross_1+run20201016_isala_cross_2+run20201023_isala_cross_3+run20201030_isala_cross_4+run20201106_isala_cross_5+run20201120_isala_cross_6+run20201204_isala_cross_8+run20201211_isala_cross_9+run20210119_isala_cross_7+Q0.Leeftijd+Q2.Q25.Spiral_hormone
Contraceptive: Hormonal spiral	Lactobacillus jensenii group	0.229924	0.211222	1.08854	0.276442	0.599104	{True: 605, False: 2438}	t223 ~lib_size+read_conc_norm+run20201009_isala_cross_1+run20201016_isala_cross_2+run20201023_isala_cross_3+run20201030_isala_cross_4+run20201106_isala_cross_5+run20201120_isala_cross_6+run20201204_isala_cross_8+run20201211_isala_cross_9+run20210119_isala_cross_7+Q0.Leeftijd+Q2.Q25.Spiral_hormone
Contraceptive: Hormonal spiral	Lactobacillus gasseri group	0.249523	0.175384	1.42272	0.154921	0.44472	{True: 605, False: 2438}	t495 ~lib_size+read_conc_norm+run20201009_isala_cross_1+run20201016_isala_cross_2+run20201023_isala_cross_3+run20201030_isala_cross_4+run20201106_isala_cross_5+run20201120_isala_cross_6+run20201204_isala_cross_8+run20201211_isala_cross_9+run20210119_isala_cross_7+Q0.Leeftijd+Q2.Q25.Spiral_hormone
Contraceptive: Hormonal spiral	Bifidobacterium	0.130675	0.126972	1.02916	0.303487	0.628091	{True: 605, False: 2438}	t272 ~lib_size+read_conc_norm+run20201009_isala_cross_1+run20201016_isala_cross_2+run20201023_isala_cross_3+run20201030_isala_cross_4+run20201106_isala_cross_5+run20201120_isala_cross_6+run20201204_isala_cross_8+run20201211_isala_cross_9+run20210119_isala_cross_7+Q0.Leeftijd+Q2.Q25.Spiral_hormone
Contraceptive: Hormonal spiral	Anaerococcus	-0.271114	0.140741	-1.92634	0.0541559	0.255262	{True: 605, False: 2438}	t123 ~lib_size+read_conc_norm+run20201009_isala_cross_1+run20201016_isala_cross_2+run20201023_isala_cross_3+run20201030_isala_cross_4+run20201106_isala_cross_5+run20201120_isala_cross_6+run20201204_isala_cross_8+run20201211_isala_cross_9+run20210119_isala_cross_7+Q0.Leeftijd+Q2.Q25.Spiral_hormone
Contraceptive: Hormonal spiral	Finegoldia	0.02711	0.121238	0.223611	0.823075	0.936904	{True: 605, False: 2438}	t472 ~lib_size+read_conc_norm+run20201009_isala_cross_1+run20201016_isala_cross_2+run20201023_isala_cross_3+run20201030_isala_cross_4+run20201106_isala_cross_5+run20201120_isala_cross_6+run20201204_isala_cross_8+run20201211_isala_cross_9+run20210119_isala_cross_7+Q0.Leeftijd+Q2.Q25.Spiral_hormone
Contraceptive: Hormonal spiral	Limosilactobacillus	0.411609	0.17213	2.39127	0.0168508	0.124026	{True: 605, False: 2438}	t433 ~lib_size+read_conc_norm+run20201009_isala_cross_1+run20201016_isala_cross_2+run20201023_isala_cross_3+run20201030_isala_cross_4+run20201106_isala_cross_5+run20201120_isala_cross_6+run20201204_isala_cross_8+run20201211_isala_cross_9+run20210119_isala_cross_7+Q0.Leeftijd+Q2.Q25.Spiral_hormone
Contraceptive: Hormonal spiral	Clostridium	-0.179184	0.132213	-1.35527	0.175433	0.475247	{True: 605, False: 2438}	t444 ~lib_size+read_conc_norm+run20201009_isala_cross_1+run20201016_isala_cross_2+run20201023_isala_cross_3+run20201030_isala_cross_4+run20201106_isala_cross_5+run20201120_isala_cross_6+run20201204_isala_cross_8+run20201211_isala_cross_9+run20210119_isala_cross_7+Q0.Leeftijd+Q2.Q25.Spiral_hormone
Contraceptive: Hormonal spiral	Streptococcus	0.183495	0.165241	1.11047	0.266885	0.589145	{True: 605, False: 2438}	t11 ~lib_size+read_conc_norm+run20201009_isala_cross_1+run20201016_isala_cross_2+run20201023_isala_cross_3+run20201030_isala_cross_4+run20201106_isala_cross_5+run20201120_isala_cross_6+run20201204_isala_cross_8+run20201211_isala_cross_9+run20210119_isala_cross_7+Q0.Leeftijd+Q2.Q25.Spiral_hormone
Contraceptive: Hormonal spiral	eigen_AV	-0.546325	0.304934	-1.79162	0.0732938	0.299313	{True: 605, False: 2438}	eigen_AV ~lib_size+read_conc_norm+run20201009_isala_cross_1+run20201016_isala_cross_2+run20201023_isala_cross_3+run20201030_isala_cross_4+run20201106_isala_cross_5+run20201120_isala_cross_6+run20201204_isala_cross_8+run20201211_isala_cross_9+run20210119_isala_cross_7+Q0.Leeftijd+Q2.Q25.Spiral_hormone
Contraceptive: Hormonal spiral	eigen_BV	0.84065	0.280183	3.00036	0.00271859	0.0353943	{True: 605, False: 2438}	eigen_BV ~lib_size+read_conc_norm+run20201009_isala_cross_1+run20201016_isala_cross_2+run20201023_isala_cross_3+run20201030_isala_cross_4+run20201106_isala_cross_5+run20201120_isala_cross_6+run20201204_isala_cross_8+run20201211_isala_cross_9+run20210119_isala_cross_7+Q0.Leeftijd+Q2.Q25.Spiral_hormone
Contraceptive: Hormonal spiral	eigen_Gut	-0.170135	0.117726	-1.44519	0.148509	0.437079	{True: 605, False: 2438}	eigen_Gut ~lib_size+read_conc_norm+run20201009_isala_cross_1+run20201016_isala_cross_2+run20201023_isala_cross_3+run20201030_isala_cross_4+run20201106_isala_cross_5+run20201120_isala_cross_6+run20201204_isala_cross_8+run20201211_isala_cross_9+run20210119_isala_cross_7+Q0.Leeftijd+Q2.Q25.Spiral_hormone
Contraceptive: Hormonal spiral	eigen_Lacto	0.426197	0.234242	1.81947	0.0689382	0.291555	{True: 605, False: 2438}	eigen_Lacto ~lib_size+read_conc_norm+run20201009_isala_cross_1+run20201016_isala_cross_2+run20201023_isala_cross_3+run20201030_isala_cross_4+run20201106_isala_cross_5+run20201120_isala_cross_6+run20201204_isala_cross_8+run20201211_isala_cross_9+run20210119_isala_cross_7+Q0.Leeftijd+Q2.Q25.Spiral_hormone
Contraceptive: Injection	Lactobacillus crispatus group	-0.809695	1.40164	-0.577677	0.563525	0.813893	{False: 3034, True: 9}	t34 ~lib_size+read_conc_norm+run20201009_isala_cross_1+run20201016_isala_cross_2+run20201023_isala_cross_3+run20201030_isala_cross_4+run20201106_isala_cross_5+run20201120_isala_cross_6+run20201204_isala_cross_8+run20201211_isala_cross_9+run20210119_isala_cross_7+Q0.Leeftijd+Q2.Q25.Prikpil
Contraceptive: Injection	Lactobacillus iners group	0.225424	1.65098	0.13654	0.891404	0.963403	{False: 3034, True: 9}	t22 ~lib_size+read_conc_norm+run20201009_isala_cross_1+run20201016_isala_cross_2+run20201023_isala_cross_3+run20201030_isala_cross_4+run20201106_isala_cross_5+run20201120_isala_cross_6+run20201204_isala_cross_8+run20201211_isala_cross_9+run20210119_isala_cross_7+Q0.Leeftijd+Q2.Q25.Prikpil
Contraceptive: Injection	Gardnerella	1.93122	1.56663	1.23272	0.217775	0.529068	{False: 3034, True: 9}	t251 ~lib_size+read_conc_norm+run20201009_isala_cross_1+run20201016_isala_cross_2+run20201023_isala_cross_3+run20201030_isala_cross_4+run20201106_isala_cross_5+run20201120_isala_cross_6+run20201204_isala_cross_8+run20201211_isala_cross_9+run20210119_isala_cross_7+Q0.Leeftijd+Q2.Q25.Prikpil
Contraceptive: Injection	Prevotella	-0.247001	1.08071	-0.228554	0.819231	0.936003	{False: 3034, True: 9}	t35 ~lib_size+read_conc_norm+run20201009_isala_cross_1+run20201016_isala_cross_2+run20201023_isala_cross_3+run20201030_isala_cross_4+run20201106_isala_cross_5+run20201120_isala_cross_6+run20201204_isala_cross_8+run20201211_isala_cross_9+run20210119_isala_cross_7+Q0.Leeftijd+Q2.Q25.Prikpil
Contraceptive: Injection	Lactobacillus jensenii group	-1.67802	1.55144	-1.08159	0.279523	0.603068	{False: 3034, True: 9}	t223 ~lib_size+read_conc_norm+run20201009_isala_cross_1+run20201016_isala_cross_2+run20201023_isala_cross_3+run20201030_isala_cross_4+run20201106_isala_cross_5+run20201120_isala_cross_6+run20201204_isala_cross_8+run20201211_isala_cross_9+run20210119_isala_cross_7+Q0.Leeftijd+Q2.Q25.Prikpil
Contraceptive: Injection	Lactobacillus gasseri group	-1.11563	1.28848	-0.865846	0.386643	0.698359	{False: 3034, True: 9}	t495 ~lib_size+read_conc_norm+run20201009_isala_cross_1+run20201016_isala_cross_2+run20201023_isala_cross_3+run20201030_isala_cross_4+run20201106_isala_cross_5+run20201120_isala_cross_6+run20201204_isala_cross_8+run20201211_isala_cross_9+run20210119_isala_cross_7+Q0.Leeftijd+Q2.Q25.Prikpil
Contraceptive: Injection	Bifidobacterium	-0.734965	0.932688	-0.788008	0.430754	0.728626	{False: 3034, True: 9}	t272 ~lib_size+read_conc_norm+run20201009_isala_cross_1+run20201016_isala_cross_2+run20201023_isala_cross_3+run20201030_isala_cross_4+run20201106_isala_cross_5+run20201120_isala_cross_6+run20201204_isala_cross_8+run20201211_isala_cross_9+run20210119_isala_cross_7+Q0.Leeftijd+Q2.Q25.Prikpil
Contraceptive: Injection	Anaerococcus	-0.00570743	1.03438	-0.00551772	0.995598	0.9992	{False: 3034, True: 9}	t123 ~lib_size+read_conc_norm+run20201009_isala_cross_1+run20201016_isala_cross_2+run20201023_isala_cross_3+run20201030_isala_cross_4+run20201106_isala_cross_5+run20201120_isala_cross_6+run20201204_isala_cross_8+run20201211_isala_cross_9+run20210119_isala_cross_7+Q0.Leeftijd+Q2.Q25.Prikpil
Contraceptive: Injection	Finegoldia	-0.588792	0.890441	-0.661237	0.508511	0.782265	{False: 3034, True: 9}	t472 ~lib_size+read_conc_norm+run20201009_isala_cross_1+run20201016_isala_cross_2+run20201023_isala_cross_3+run20201030_isala_cross_4+run20201106_isala_cross_5+run20201120_isala_cross_6+run20201204_isala_cross_8+run20201211_isala_cross_9+run20210119_isala_cross_7+Q0.Leeftijd+Q2.Q25.Prikpil
Contraceptive: Injection	Limosilactobacillus	-0.600677	1.26545	-0.474674	0.635054	0.848677	{False: 3034, True: 9}	t433 ~lib_size+read_conc_norm+run20201009_isala_cross_1+run20201016_isala_cross_2+run20201023_isala_cross_3+run20201030_isala_cross_4+run20201106_isala_cross_5+run20201120_isala_cross_6+run20201204_isala_cross_8+run20201211_isala_cross_9+run20210119_isala_cross_7+Q0.Leeftijd+Q2.Q25.Prikpil
Contraceptive: Injection	Clostridium	-0.303692	0.971391	-0.312636	0.754579	0.907577	{False: 3034, True: 9}	t444 ~lib_size+read_conc_norm+run20201009_isala_cross_1+run20201016_isala_cross_2+run20201023_isala_cross_3+run20201030_isala_cross_4+run20201106_isala_cross_5+run20201120_isala_cross_6+run20201204_isala_cross_8+run20201211_isala_cross_9+run20210119_isala_cross_7+Q0.Leeftijd+Q2.Q25.Prikpil
Contraceptive: Injection	Streptococcus	0.496565	1.21392	0.409061	0.682524	0.875782	{False: 3034, True: 9}	t11 ~lib_size+read_conc_norm+run20201009_isala_cross_1+run20201016_isala_cross_2+run20201023_isala_cross_3+run20201030_isala_cross_4+run20201106_isala_cross_5+run20201120_isala_cross_6+run20201204_isala_cross_8+run20201211_isala_cross_9+run20210119_isala_cross_7+Q0.Leeftijd+Q2.Q25.Prikpil
Contraceptive: Injection	eigen_AV	-1.71048	2.24073	-0.763359	0.445309	0.736964	{False: 3034, True: 9}	eigen_AV ~lib_size+read_conc_norm+run20201009_isala_cross_1+run20201016_isala_cross_2+run20201023_isala_cross_3+run20201030_isala_cross_4+run20201106_isala_cross_5+run20201120_isala_cross_6+run20201204_isala_cross_8+run20201211_isala_cross_9+run20210119_isala_cross_7+Q0.Leeftijd+Q2.Q25.Prikpil
Contraceptive: Injection	eigen_BV	1.50973	2.06084	0.73258	0.463871	0.751016	{False: 3034, True: 9}	eigen_BV ~lib_size+read_conc_norm+run20201009_isala_cross_1+run20201016_isala_cross_2+run20201023_isala_cross_3+run20201030_isala_cross_4+run20201106_isala_cross_5+run20201120_isala_cross_6+run20201204_isala_cross_8+run20201211_isala_cross_9+run20210119_isala_cross_7+Q0.Leeftijd+Q2.Q25.Prikpil
Contraceptive: Injection	eigen_Gut	-0.517522	0.864949	-0.598327	0.549667	0.805522	{False: 3034, True: 9}	eigen_Gut ~lib_size+read_conc_norm+run20201009_isala_cross_1+run20201016_isala_cross_2+run20201023_isala_cross_3+run20201030_isala_cross_4+run20201106_isala_cross_5+run20201120_isala_cross_6+run20201204_isala_cross_8+run20201211_isala_cross_9+run20210119_isala_cross_7+Q0.Leeftijd+Q2.Q25.Prikpil
Contraceptive: Injection	eigen_Lacto	-1.88922	1.72112	-1.09767	0.272436	0.595305	{False: 3034, True: 9}	eigen_Lacto ~lib_size+read_conc_norm+run20201009_isala_cross_1+run20201016_isala_cross_2+run20201023_isala_cross_3+run20201030_isala_cross_4+run20201106_isala_cross_5+run20201120_isala_cross_6+run20201204_isala_cross_8+run20201211_isala_cross_9+run20210119_isala_cross_7+Q0.Leeftijd+Q2.Q25.Prikpil
Contraceptive: Ring	Lactobacillus crispatus group	0.1907	0.367582	0.518796	0.603941	0.837412	{False: 2906, True: 137}	t34 ~lib_size+read_conc_norm+run20201009_isala_cross_1+run20201016_isala_cross_2+run20201023_isala_cross_3+run20201030_isala_cross_4+run20201106_isala_cross_5+run20201120_isala_cross_6+run20201204_isala_cross_8+run20201211_isala_cross_9+run20210119_isala_cross_7+Q0.Leeftijd+Q2.Q25.Ring
Contraceptive: Ring	Lactobacillus iners group	0.324435	0.432927	0.749398	0.453675	0.744642	{False: 2906, True: 137}	t22 ~lib_size+read_conc_norm+run20201009_isala_cross_1+run20201016_isala_cross_2+run20201023_isala_cross_3+run20201030_isala_cross_4+run20201106_isala_cross_5+run20201120_isala_cross_6+run20201204_isala_cross_8+run20201211_isala_cross_9+run20210119_isala_cross_7+Q0.Leeftijd+Q2.Q25.Ring
Contraceptive: Ring	Gardnerella	-0.724735	0.410738	-1.76447	0.0777539	0.308008	{False: 2906, True: 137}	t251 ~lib_size+read_conc_norm+run20201009_isala_cross_1+run20201016_isala_cross_2+run20201023_isala_cross_3+run20201030_isala_cross_4+run20201106_isala_cross_5+run20201120_isala_cross_6+run20201204_isala_cross_8+run20201211_isala_cross_9+run20210119_isala_cross_7+Q0.Leeftijd+Q2.Q25.Ring
Contraceptive: Ring	Prevotella	-1.01498	0.282818	-3.58883	0.000337425	0.00703356	{False: 2906, True: 137}	t35 ~lib_size+read_conc_norm+run20201009_isala_cross_1+run20201016_isala_cross_2+run20201023_isala_cross_3+run20201030_isala_cross_4+run20201106_isala_cross_5+run20201120_isala_cross_6+run20201204_isala_cross_8+run20201211_isala_cross_9+run20210119_isala_cross_7+Q0.Leeftijd+Q2.Q25.Ring
Contraceptive: Ring	Lactobacillus jensenii group	0.343339	0.406895	0.843804	0.398846	0.70574	{False: 2906, True: 137}	t223 ~lib_size+read_conc_norm+run20201009_isala_cross_1+run20201016_isala_cross_2+run20201023_isala_cross_3+run20201030_isala_cross_4+run20201106_isala_cross_5+run20201120_isala_cross_6+run20201204_isala_cross_8+run20201211_isala_cross_9+run20210119_isala_cross_7+Q0.Leeftijd+Q2.Q25.Ring
Contraceptive: Ring	Lactobacillus gasseri group	-0.186081	0.337927	-0.550654	0.581912	0.825613	{False: 2906, True: 137}	t495 ~lib_size+read_conc_norm+run20201009_isala_cross_1+run20201016_isala_cross_2+run20201023_isala_cross_3+run20201030_isala_cross_4+run20201106_isala_cross_5+run20201120_isala_cross_6+run20201204_isala_cross_8+run20201211_isala_cross_9+run20210119_isala_cross_7+Q0.Leeftijd+Q2.Q25.Ring
Contraceptive: Ring	Bifidobacterium	-0.209972	0.244591	-0.858461	0.390706	0.70008	{False: 2906, True: 137}	t272 ~lib_size+read_conc_norm+run20201009_isala_cross_1+run20201016_isala_cross_2+run20201023_isala_cross_3+run20201030_isala_cross_4+run20201106_isala_cross_5+run20201120_isala_cross_6+run20201204_isala_cross_8+run20201211_isala_cross_9+run20210119_isala_cross_7+Q0.Leeftijd+Q2.Q25.Ring
Contraceptive: Ring	Anaerococcus	-0.487419	0.27112	-1.79779	0.0723091	0.297667	{False: 2906, True: 137}	t123 ~lib_size+read_conc_norm+run20201009_isala_cross_1+run20201016_isala_cross_2+run20201023_isala_cross_3+run20201030_isala_cross_4+run20201106_isala_cross_5+run20201120_isala_cross_6+run20201204_isala_cross_8+run20201211_isala_cross_9+run20210119_isala_cross_7+Q0.Leeftijd+Q2.Q25.Ring
Contraceptive: Ring	Finegoldia	-0.321116	0.233461	-1.37546	0.16909	0.466393	{False: 2906, True: 137}	t472 ~lib_size+read_conc_norm+run20201009_isala_cross_1+run20201016_isala_cross_2+run20201023_isala_cross_3+run20201030_isala_cross_4+run20201106_isala_cross_5+run20201120_isala_cross_6+run20201204_isala_cross_8+run20201211_isala_cross_9+run20210119_isala_cross_7+Q0.Leeftijd+Q2.Q25.Ring
Contraceptive: Ring	Limosilactobacillus	-0.498585	0.331751	-1.50289	0.132973	0.413473	{False: 2906, True: 137}	t433 ~lib_size+read_conc_norm+run20201009_isala_cross_1+run20201016_isala_cross_2+run20201023_isala_cross_3+run20201030_isala_cross_4+run20201106_isala_cross_5+run20201120_isala_cross_6+run20201204_isala_cross_8+run20201211_isala_cross_9+run20210119_isala_cross_7+Q0.Leeftijd+Q2.Q25.Ring
Contraceptive: Ring	Clostridium	-0.207956	0.254722	-0.816402	0.414334	0.715444	{False: 2906, True: 137}	t444 ~lib_size+read_conc_norm+run20201009_isala_cross_1+run20201016_isala_cross_2+run20201023_isala_cross_3+run20201030_isala_cross_4+run20201106_isala_cross_5+run20201120_isala_cross_6+run20201204_isala_cross_8+run20201211_isala_cross_9+run20210119_isala_cross_7+Q0.Leeftijd+Q2.Q25.Ring
Contraceptive: Ring	Streptococcus	-0.705761	0.318098	-2.21869	0.0265818	0.16274	{False: 2906, True: 137}	t11 ~lib_size+read_conc_norm+run20201009_isala_cross_1+run20201016_isala_cross_2+run20201023_isala_cross_3+run20201030_isala_cross_4+run20201106_isala_cross_5+run20201120_isala_cross_6+run20201204_isala_cross_8+run20201211_isala_cross_9+run20210119_isala_cross_7+Q0.Leeftijd+Q2.Q25.Ring
Contraceptive: Ring	eigen_AV	-0.92964	0.587442	-1.58252	0.113635	0.375719	{False: 2906, True: 137}	eigen_AV ~lib_size+read_conc_norm+run20201009_isala_cross_1+run20201016_isala_cross_2+run20201023_isala_cross_3+run20201030_isala_cross_4+run20201106_isala_cross_5+run20201120_isala_cross_6+run20201204_isala_cross_8+run20201211_isala_cross_9+run20210119_isala_cross_7+Q0.Leeftijd+Q2.Q25.Ring
Contraceptive: Ring	eigen_BV	-1.10554	0.540126	-2.04682	0.040762	0.216411	{False: 2906, True: 137}	eigen_BV ~lib_size+read_conc_norm+run20201009_isala_cross_1+run20201016_isala_cross_2+run20201023_isala_cross_3+run20201030_isala_cross_4+run20201106_isala_cross_5+run20201120_isala_cross_6+run20201204_isala_cross_8+run20201211_isala_cross_9+run20210119_isala_cross_7+Q0.Leeftijd+Q2.Q25.Ring
Contraceptive: Ring	eigen_Gut	-0.162193	0.226826	-0.715055	0.47463	0.758423	{False: 2906, True: 137}	eigen_Gut ~lib_size+read_conc_norm+run20201009_isala_cross_1+run20201016_isala_cross_2+run20201023_isala_cross_3+run20201030_isala_cross_4+run20201106_isala_cross_5+run20201120_isala_cross_6+run20201204_isala_cross_8+run20201211_isala_cross_9+run20210119_isala_cross_7+Q0.Leeftijd+Q2.Q25.Ring
Contraceptive: Ring	eigen_Lacto	0.0838198	0.451448	0.185669	0.852717	0.947394	{False: 2906, True: 137}	eigen_Lacto ~lib_size+read_conc_norm+run20201009_isala_cross_1+run20201016_isala_cross_2+run20201023_isala_cross_3+run20201030_isala_cross_4+run20201106_isala_cross_5+run20201120_isala_cross_6+run20201204_isala_cross_8+run20201211_isala_cross_9+run20210119_isala_cross_7+Q0.Leeftijd+Q2.Q25.Ring
Contraceptive: Implant	Lactobacillus crispatus group	0.0499815	0.878468	0.0568962	0.954632	0.986629	{False: 3020, True: 23}	t34 ~lib_size+read_conc_norm+run20201009_isala_cross_1+run20201016_isala_cross_2+run20201023_isala_cross_3+run20201030_isala_cross_4+run20201106_isala_cross_5+run20201120_isala_cross_6+run20201204_isala_cross_8+run20201211_isala_cross_9+run20210119_isala_cross_7+Q0.Leeftijd+Q2.Q25.Implant
Contraceptive: Implant	Lactobacillus iners group	-0.767731	1.03459	-0.742063	0.458106	0.748019	{False: 3020, True: 23}	t22 ~lib_size+read_conc_norm+run20201009_isala_cross_1+run20201016_isala_cross_2+run20201023_isala_cross_3+run20201030_isala_cross_4+run20201106_isala_cross_5+run20201120_isala_cross_6+run20201204_isala_cross_8+run20201211_isala_cross_9+run20210119_isala_cross_7+Q0.Leeftijd+Q2.Q25.Implant
Contraceptive: Implant	Gardnerella	1.0097	0.981895	1.02832	0.303882	0.628091	{False: 3020, True: 23}	t251 ~lib_size+read_conc_norm+run20201009_isala_cross_1+run20201016_isala_cross_2+run20201023_isala_cross_3+run20201030_isala_cross_4+run20201106_isala_cross_5+run20201120_isala_cross_6+run20201204_isala_cross_8+run20201211_isala_cross_9+run20210119_isala_cross_7+Q0.Leeftijd+Q2.Q25.Implant
Contraceptive: Implant	Prevotella	1.33365	0.676865	1.97034	0.0488906	0.241272	{False: 3020, True: 23}	t35 ~lib_size+read_conc_norm+run20201009_isala_cross_1+run20201016_isala_cross_2+run20201023_isala_cross_3+run20201030_isala_cross_4+run20201106_isala_cross_5+run20201120_isala_cross_6+run20201204_isala_cross_8+run20201211_isala_cross_9+run20210119_isala_cross_7+Q0.Leeftijd+Q2.Q25.Implant
Contraceptive: Implant	Lactobacillus jensenii group	0.160001	0.972487	0.164528	0.869326	0.954075	{False: 3020, True: 23}	t223 ~lib_size+read_conc_norm+run20201009_isala_cross_1+run20201016_isala_cross_2+run20201023_isala_cross_3+run20201030_isala_cross_4+run20201106_isala_cross_5+run20201120_isala_cross_6+run20201204_isala_cross_8+run20201211_isala_cross_9+run20210119_isala_cross_7+Q0.Leeftijd+Q2.Q25.Implant
Contraceptive: Implant	Lactobacillus gasseri group	0.771095	0.807481	0.95494	0.339684	0.656978	{False: 3020, True: 23}	t495 ~lib_size+read_conc_norm+run20201009_isala_cross_1+run20201016_isala_cross_2+run20201023_isala_cross_3+run20201030_isala_cross_4+run20201106_isala_cross_5+run20201120_isala_cross_6+run20201204_isala_cross_8+run20201211_isala_cross_9+run20210119_isala_cross_7+Q0.Leeftijd+Q2.Q25.Implant
Contraceptive: Implant	Bifidobacterium	0.466145	0.584522	0.797482	0.425234	0.724223	{False: 3020, True: 23}	t272 ~lib_size+read_conc_norm+run20201009_isala_cross_1+run20201016_isala_cross_2+run20201023_isala_cross_3+run20201030_isala_cross_4+run20201106_isala_cross_5+run20201120_isala_cross_6+run20201204_isala_cross_8+run20201211_isala_cross_9+run20210119_isala_cross_7+Q0.Leeftijd+Q2.Q25.Implant
Contraceptive: Implant	Anaerococcus	1.71754	0.647504	2.65255	0.00803031	0.0750962	{False: 3020, True: 23}	t123 ~lib_size+read_conc_norm+run20201009_isala_cross_1+run20201016_isala_cross_2+run20201023_isala_cross_3+run20201030_isala_cross_4+run20201106_isala_cross_5+run20201120_isala_cross_6+run20201204_isala_cross_8+run20201211_isala_cross_9+run20210119_isala_cross_7+Q0.Leeftijd+Q2.Q25.Implant
Contraceptive: Implant	Finegoldia	0.739299	0.557925	1.32509	0.185243	0.489045	{False: 3020, True: 23}	t472 ~lib_size+read_conc_norm+run20201009_isala_cross_1+run20201016_isala_cross_2+run20201023_isala_cross_3+run20201030_isala_cross_4+run20201106_isala_cross_5+run20201120_isala_cross_6+run20201204_isala_cross_8+run20201211_isala_cross_9+run20210119_isala_cross_7+Q0.Leeftijd+Q2.Q25.Implant
Contraceptive: Implant	Limosilactobacillus	-0.0235738	0.793098	-0.0297237	0.976289	0.992771	{False: 3020, True: 23}	t433 ~lib_size+read_conc_norm+run20201009_isala_cross_1+run20201016_isala_cross_2+run20201023_isala_cross_3+run20201030_isala_cross_4+run20201106_isala_cross_5+run20201120_isala_cross_6+run20201204_isala_cross_8+run20201211_isala_cross_9+run20210119_isala_cross_7+Q0.Leeftijd+Q2.Q25.Implant
Contraceptive: Implant	Clostridium	0.535525	0.608711	0.879769	0.379054	0.691561	{False: 3020, True: 23}	t444 ~lib_size+read_conc_norm+run20201009_isala_cross_1+run20201016_isala_cross_2+run20201023_isala_cross_3+run20201030_isala_cross_4+run20201106_isala_cross_5+run20201120_isala_cross_6+run20201204_isala_cross_8+run20201211_isala_cross_9+run20210119_isala_cross_7+Q0.Leeftijd+Q2.Q25.Implant
Contraceptive: Implant	Streptococcus	0.0592472	0.760792	0.0778757	0.937932	0.980498	{False: 3020, True: 23}	t11 ~lib_size+read_conc_norm+run20201009_isala_cross_1+run20201016_isala_cross_2+run20201023_isala_cross_3+run20201030_isala_cross_4+run20201106_isala_cross_5+run20201120_isala_cross_6+run20201204_isala_cross_8+run20201211_isala_cross_9+run20210119_isala_cross_7+Q0.Leeftijd+Q2.Q25.Implant
Contraceptive: Implant	eigen_AV	3.40073	1.40306	2.42379	0.0154176	0.117588	{False: 3020, True: 23}	eigen_AV ~lib_size+read_conc_norm+run20201009_isala_cross_1+run20201016_isala_cross_2+run20201023_isala_cross_3+run20201030_isala_cross_4+run20201106_isala_cross_5+run20201120_isala_cross_6+run20201204_isala_cross_8+run20201211_isala_cross_9+run20210119_isala_cross_7+Q0.Leeftijd+Q2.Q25.Implant
Contraceptive: Implant	eigen_BV	2.38346	1.29093	1.84631	0.0649447	0.281189	{False: 3020, True: 23}	eigen_BV ~lib_size+read_conc_norm+run20201009_isala_cross_1+run20201016_isala_cross_2+run20201023_isala_cross_3+run20201030_isala_cross_4+run20201106_isala_cross_5+run20201120_isala_cross_6+run20201204_isala_cross_8+run20201211_isala_cross_9+run20210119_isala_cross_7+Q0.Leeftijd+Q2.Q25.Implant
Contraceptive: Implant	eigen_Gut	-0.811269	0.541903	-1.49708	0.134478	0.417082	{False: 3020, True: 23}	eigen_Gut ~lib_size+read_conc_norm+run20201009_isala_cross_1+run20201016_isala_cross_2+run20201023_isala_cross_3+run20201030_isala_cross_4+run20201106_isala_cross_5+run20201120_isala_cross_6+run20201204_isala_cross_8+run20201211_isala_cross_9+run20210119_isala_cross_7+Q0.Leeftijd+Q2.Q25.Implant
Contraceptive: Implant	eigen_Lacto	0.125656	1.07885	0.116472	0.907286	0.970045	{False: 3020, True: 23}	eigen_Lacto ~lib_size+read_conc_norm+run20201009_isala_cross_1+run20201016_isala_cross_2+run20201023_isala_cross_3+run20201030_isala_cross_4+run20201106_isala_cross_5+run20201120_isala_cross_6+run20201204_isala_cross_8+run20201211_isala_cross_9+run20210119_isala_cross_7+Q0.Leeftijd+Q2.Q25.Implant
Contraceptive: Plaster	Lactobacillus crispatus group	1.69236	1.48648	1.1385	0.255001	0.575948	{False: 3035, True: 8}	t34 ~lib_size+read_conc_norm+run20201009_isala_cross_1+run20201016_isala_cross_2+run20201023_isala_cross_3+run20201030_isala_cross_4+run20201106_isala_cross_5+run20201120_isala_cross_6+run20201204_isala_cross_8+run20201211_isala_cross_9+run20210119_isala_cross_7+Q0.Leeftijd+Q2.Q25.Plaster
Contraceptive: Plaster	Lactobacillus iners group	-2.1688	1.75074	-1.23879	0.215519	0.526397	{False: 3035, True: 8}	t22 ~lib_size+read_conc_norm+run20201009_isala_cross_1+run20201016_isala_cross_2+run20201023_isala_cross_3+run20201030_isala_cross_4+run20201106_isala_cross_5+run20201120_isala_cross_6+run20201204_isala_cross_8+run20201211_isala_cross_9+run20210119_isala_cross_7+Q0.Leeftijd+Q2.Q25.Plaster
Contraceptive: Plaster	Gardnerella	-2.0232	1.66173	-1.21753	0.223497	0.53739	{False: 3035, True: 8}	t251 ~lib_size+read_conc_norm+run20201009_isala_cross_1+run20201016_isala_cross_2+run20201023_isala_cross_3+run20201030_isala_cross_4+run20201106_isala_cross_5+run20201120_isala_cross_6+run20201204_isala_cross_8+run20201211_isala_cross_9+run20210119_isala_cross_7+Q0.Leeftijd+Q2.Q25.Plaster
Contraceptive: Plaster	Prevotella	0.214942	1.14631	0.187508	0.851275	0.946575	{False: 3035, True: 8}	t35 ~lib_size+read_conc_norm+run20201009_isala_cross_1+run20201016_isala_cross_2+run20201023_isala_cross_3+run20201030_isala_cross_4+run20201106_isala_cross_5+run20201120_isala_cross_6+run20201204_isala_cross_8+run20201211_isala_cross_9+run20210119_isala_cross_7+Q0.Leeftijd+Q2.Q25.Plaster
Contraceptive: Plaster	Lactobacillus jensenii group	-0.240344	1.64592	-0.146024	0.883912	0.959582	{False: 3035, True: 8}	t223 ~lib_size+read_conc_norm+run20201009_isala_cross_1+run20201016_isala_cross_2+run20201023_isala_cross_3+run20201030_isala_cross_4+run20201106_isala_cross_5+run20201120_isala_cross_6+run20201204_isala_cross_8+run20201211_isala_cross_9+run20210119_isala_cross_7+Q0.Leeftijd+Q2.Q25.Plaster
Contraceptive: Plaster	Lactobacillus gasseri group	-1.12937	1.3667	-0.82635	0.408671	0.712296	{False: 3035, True: 8}	t495 ~lib_size+read_conc_norm+run20201009_isala_cross_1+run20201016_isala_cross_2+run20201023_isala_cross_3+run20201030_isala_cross_4+run20201106_isala_cross_5+run20201120_isala_cross_6+run20201204_isala_cross_8+run20201211_isala_cross_9+run20210119_isala_cross_7+Q0.Leeftijd+Q2.Q25.Plaster
Contraceptive: Plaster	Bifidobacterium	0.153188	0.989394	0.15483	0.876965	0.958519	{False: 3035, True: 8}	t272 ~lib_size+read_conc_norm+run20201009_isala_cross_1+run20201016_isala_cross_2+run20201023_isala_cross_3+run20201030_isala_cross_4+run20201106_isala_cross_5+run20201120_isala_cross_6+run20201204_isala_cross_8+run20201211_isala_cross_9+run20210119_isala_cross_7+Q0.Leeftijd+Q2.Q25.Plaster
Contraceptive: Plaster	Anaerococcus	0.506901	1.09712	0.462027	0.644095	0.853515	{False: 3035, True: 8}	t123 ~lib_size+read_conc_norm+run20201009_isala_cross_1+run20201016_isala_cross_2+run20201023_isala_cross_3+run20201030_isala_cross_4+run20201106_isala_cross_5+run20201120_isala_cross_6+run20201204_isala_cross_8+run20201211_isala_cross_9+run20210119_isala_cross_7+Q0.Leeftijd+Q2.Q25.Plaster
Contraceptive: Plaster	Finegoldia	0.500493	0.94451	0.529897	0.596222	0.833857	{False: 3035, True: 8}	t472 ~lib_size+read_conc_norm+run20201009_isala_cross_1+run20201016_isala_cross_2+run20201023_isala_cross_3+run20201030_isala_cross_4+run20201106_isala_cross_5+run20201120_isala_cross_6+run20201204_isala_cross_8+run20201211_isala_cross_9+run20210119_isala_cross_7+Q0.Leeftijd+Q2.Q25.Plaster
Contraceptive: Plaster	Limosilactobacillus	-0.125149	1.34231	-0.0932347	0.925723	0.976714	{False: 3035, True: 8}	t433 ~lib_size+read_conc_norm+run20201009_isala_cross_1+run20201016_isala_cross_2+run20201023_isala_cross_3+run20201030_isala_cross_4+run20201106_isala_cross_5+run20201120_isala_cross_6+run20201204_isala_cross_8+run20201211_isala_cross_9+run20210119_isala_cross_7+Q0.Leeftijd+Q2.Q25.Plaster
Contraceptive: Plaster	Clostridium	-0.144069	1.03036	-0.139823	0.888809	0.961966	{False: 3035, True: 8}	t444 ~lib_size+read_conc_norm+run20201009_isala_cross_1+run20201016_isala_cross_2+run20201023_isala_cross_3+run20201030_isala_cross_4+run20201106_isala_cross_5+run20201120_isala_cross_6+run20201204_isala_cross_8+run20201211_isala_cross_9+run20210119_isala_cross_7+Q0.Leeftijd+Q2.Q25.Plaster
Contraceptive: Plaster	Streptococcus	0.217373	1.28762	0.168817	0.865952	0.953094	{False: 3035, True: 8}	t11 ~lib_size+read_conc_norm+run20201009_isala_cross_1+run20201016_isala_cross_2+run20201023_isala_cross_3+run20201030_isala_cross_4+run20201106_isala_cross_5+run20201120_isala_cross_6+run20201204_isala_cross_8+run20201211_isala_cross_9+run20210119_isala_cross_7+Q0.Leeftijd+Q2.Q25.Plaster
Contraceptive: Plaster	eigen_AV	4.56339	2.37551	1.92101	0.0548237	0.257078	{False: 3035, True: 8}	eigen_AV ~lib_size+read_conc_norm+run20201009_isala_cross_1+run20201016_isala_cross_2+run20201023_isala_cross_3+run20201030_isala_cross_4+run20201106_isala_cross_5+run20201120_isala_cross_6+run20201204_isala_cross_8+run20201211_isala_cross_9+run20210119_isala_cross_7+Q0.Leeftijd+Q2.Q25.Plaster
Contraceptive: Plaster	eigen_BV	-2.23266	2.18574	-1.02147	0.307115	0.630706	{False: 3035, True: 8}	eigen_BV ~lib_size+read_conc_norm+run20201009_isala_cross_1+run20201016_isala_cross_2+run20201023_isala_cross_3+run20201030_isala_cross_4+run20201106_isala_cross_5+run20201120_isala_cross_6+run20201204_isala_cross_8+run20201211_isala_cross_9+run20210119_isala_cross_7+Q0.Leeftijd+Q2.Q25.Plaster
Contraceptive: Plaster	eigen_Gut	1.42452	0.917136	1.55323	0.120472	0.389313	{False: 3035, True: 8}	eigen_Gut ~lib_size+read_conc_norm+run20201009_isala_cross_1+run20201016_isala_cross_2+run20201023_isala_cross_3+run20201030_isala_cross_4+run20201106_isala_cross_5+run20201120_isala_cross_6+run20201204_isala_cross_8+run20201211_isala_cross_9+run20210119_isala_cross_7+Q0.Leeftijd+Q2.Q25.Plaster
Contraceptive: Plaster	eigen_Lacto	0.605488	1.82591	0.331608	0.740208	0.900416	{False: 3035, True: 8}	eigen_Lacto ~lib_size+read_conc_norm+run20201009_isala_cross_1+run20201016_isala_cross_2+run20201023_isala_cross_3+run20201030_isala_cross_4+run20201106_isala_cross_5+run20201120_isala_cross_6+run20201204_isala_cross_8+run20201211_isala_cross_9+run20210119_isala_cross_7+Q0.Leeftijd+Q2.Q25.Plaster
Contraceptive: Condom	Lactobacillus crispatus group	-0.115264	0.226817	-0.508179	0.611365	0.837739	{False: 2643, True: 400}	t34 ~lib_size+read_conc_norm+run20201009_isala_cross_1+run20201016_isala_cross_2+run20201023_isala_cross_3+run20201030_isala_cross_4+run20201106_isala_cross_5+run20201120_isala_cross_6+run20201204_isala_cross_8+run20201211_isala_cross_9+run20210119_isala_cross_7+Q0.Leeftijd+Q2.Q25.Condom
Contraceptive: Condom	Lactobacillus iners group	-0.144649	0.26715	-0.541455	0.588234	0.829323	{False: 2643, True: 400}	t22 ~lib_size+read_conc_norm+run20201009_isala_cross_1+run20201016_isala_cross_2+run20201023_isala_cross_3+run20201030_isala_cross_4+run20201106_isala_cross_5+run20201120_isala_cross_6+run20201204_isala_cross_8+run20201211_isala_cross_9+run20210119_isala_cross_7+Q0.Leeftijd+Q2.Q25.Condom
Contraceptive: Condom	Gardnerella	0.185686	0.253554	0.732333	0.464022	0.751016	{False: 2643, True: 400}	t251 ~lib_size+read_conc_norm+run20201009_isala_cross_1+run20201016_isala_cross_2+run20201023_isala_cross_3+run20201030_isala_cross_4+run20201106_isala_cross_5+run20201120_isala_cross_6+run20201204_isala_cross_8+run20201211_isala_cross_9+run20210119_isala_cross_7+Q0.Leeftijd+Q2.Q25.Condom
Contraceptive: Condom	Prevotella	0.0527234	0.17488	0.301483	0.763067	0.911231	{False: 2643, True: 400}	t35 ~lib_size+read_conc_norm+run20201009_isala_cross_1+run20201016_isala_cross_2+run20201023_isala_cross_3+run20201030_isala_cross_4+run20201106_isala_cross_5+run20201120_isala_cross_6+run20201204_isala_cross_8+run20201211_isala_cross_9+run20210119_isala_cross_7+Q0.Leeftijd+Q2.Q25.Condom
Contraceptive: Condom	Lactobacillus jensenii group	0.033708	0.251103	0.13424	0.893222	0.964576	{False: 2643, True: 400}	t223 ~lib_size+read_conc_norm+run20201009_isala_cross_1+run20201016_isala_cross_2+run20201023_isala_cross_3+run20201030_isala_cross_4+run20201106_isala_cross_5+run20201120_isala_cross_6+run20201204_isala_cross_8+run20201211_isala_cross_9+run20210119_isala_cross_7+Q0.Leeftijd+Q2.Q25.Condom
Contraceptive: Condom	Lactobacillus gasseri group	0.297518	0.208458	1.42723	0.153617	0.443579	{False: 2643, True: 400}	t495 ~lib_size+read_conc_norm+run20201009_isala_cross_1+run20201016_isala_cross_2+run20201023_isala_cross_3+run20201030_isala_cross_4+run20201106_isala_cross_5+run20201120_isala_cross_6+run20201204_isala_cross_8+run20201211_isala_cross_9+run20210119_isala_cross_7+Q0.Leeftijd+Q2.Q25.Condom
Contraceptive: Condom	Bifidobacterium	-0.0729321	0.150938	-0.483194	0.628993	0.843957	{False: 2643, True: 400}	t272 ~lib_size+read_conc_norm+run20201009_isala_cross_1+run20201016_isala_cross_2+run20201023_isala_cross_3+run20201030_isala_cross_4+run20201106_isala_cross_5+run20201120_isala_cross_6+run20201204_isala_cross_8+run20201211_isala_cross_9+run20210119_isala_cross_7+Q0.Leeftijd+Q2.Q25.Condom
Contraceptive: Condom	Anaerococcus	0.210725	0.16734	1.25926	0.208034	0.516429	{False: 2643, True: 400}	t123 ~lib_size+read_conc_norm+run20201009_isala_cross_1+run20201016_isala_cross_2+run20201023_isala_cross_3+run20201030_isala_cross_4+run20201106_isala_cross_5+run20201120_isala_cross_6+run20201204_isala_cross_8+run20201211_isala_cross_9+run20210119_isala_cross_7+Q0.Leeftijd+Q2.Q25.Condom
Contraceptive: Condom	Finegoldia	0.0956334	0.144091	0.663699	0.506933	0.781336	{False: 2643, True: 400}	t472 ~lib_size+read_conc_norm+run20201009_isala_cross_1+run20201016_isala_cross_2+run20201023_isala_cross_3+run20201030_isala_cross_4+run20201106_isala_cross_5+run20201120_isala_cross_6+run20201204_isala_cross_8+run20201211_isala_cross_9+run20210119_isala_cross_7+Q0.Leeftijd+Q2.Q25.Condom
Contraceptive: Condom	Limosilactobacillus	0.360414	0.204679	1.76088	0.0783598	0.309212	{False: 2643, True: 400}	t433 ~lib_size+read_conc_norm+run20201009_isala_cross_1+run20201016_isala_cross_2+run20201023_isala_cross_3+run20201030_isala_cross_4+run20201106_isala_cross_5+run20201120_isala_cross_6+run20201204_isala_cross_8+run20201211_isala_cross_9+run20210119_isala_cross_7+Q0.Leeftijd+Q2.Q25.Condom
Contraceptive: Condom	Clostridium	-0.135549	0.157174	-0.862414	0.388528	0.698359	{False: 2643, True: 400}	t444 ~lib_size+read_conc_norm+run20201009_isala_cross_1+run20201016_isala_cross_2+run20201023_isala_cross_3+run20201030_isala_cross_4+run20201106_isala_cross_5+run20201120_isala_cross_6+run20201204_isala_cross_8+run20201211_isala_cross_9+run20210119_isala_cross_7+Q0.Leeftijd+Q2.Q25.Condom
Contraceptive: Condom	Streptococcus	0.20168	0.196408	1.02685	0.304575	0.628091	{False: 2643, True: 400}	t11 ~lib_size+read_conc_norm+run20201009_isala_cross_1+run20201016_isala_cross_2+run20201023_isala_cross_3+run20201030_isala_cross_4+run20201106_isala_cross_5+run20201120_isala_cross_6+run20201204_isala_cross_8+run20201211_isala_cross_9+run20210119_isala_cross_7+Q0.Leeftijd+Q2.Q25.Condom
Contraceptive: Condom	eigen_AV	0.122468	0.362624	0.337727	0.735593	0.897682	{False: 2643, True: 400}	eigen_AV ~lib_size+read_conc_norm+run20201009_isala_cross_1+run20201016_isala_cross_2+run20201023_isala_cross_3+run20201030_isala_cross_4+run20201106_isala_cross_5+run20201120_isala_cross_6+run20201204_isala_cross_8+run20201211_isala_cross_9+run20210119_isala_cross_7+Q0.Leeftijd+Q2.Q25.Condom
Contraceptive: Condom	eigen_BV	-0.129743	0.333507	-0.389027	0.697283	0.881709	{False: 2643, True: 400}	eigen_BV ~lib_size+read_conc_norm+run20201009_isala_cross_1+run20201016_isala_cross_2+run20201023_isala_cross_3+run20201030_isala_cross_4+run20201106_isala_cross_5+run20201120_isala_cross_6+run20201204_isala_cross_8+run20201211_isala_cross_9+run20210119_isala_cross_7+Q0.Leeftijd+Q2.Q25.Condom
Contraceptive: Condom	eigen_Gut	-0.0865334	0.139966	-0.618246	0.536459	0.797593	{False: 2643, True: 400}	eigen_Gut ~lib_size+read_conc_norm+run20201009_isala_cross_1+run20201016_isala_cross_2+run20201023_isala_cross_3+run20201030_isala_cross_4+run20201106_isala_cross_5+run20201120_isala_cross_6+run20201204_isala_cross_8+run20201211_isala_cross_9+run20210119_isala_cross_7+Q0.Leeftijd+Q2.Q25.Condom
Contraceptive: Condom	eigen_Lacto	0.14942	0.278555	0.536413	0.591713	0.83073	{False: 2643, True: 400}	eigen_Lacto ~lib_size+read_conc_norm+run20201009_isala_cross_1+run20201016_isala_cross_2+run20201023_isala_cross_3+run20201030_isala_cross_4+run20201106_isala_cross_5+run20201120_isala_cross_6+run20201204_isala_cross_8+run20201211_isala_cross_9+run20210119_isala_cross_7+Q0.Leeftijd+Q2.Q25.Condom
Contraceptive: Cup	Lactobacillus crispatus group	2.1498	2.9686	0.724181	0.46901	0.75474	{False: 3041, True: 2}	t34 ~lib_size+read_conc_norm+run20201009_isala_cross_1+run20201016_isala_cross_2+run20201023_isala_cross_3+run20201030_isala_cross_4+run20201106_isala_cross_5+run20201120_isala_cross_6+run20201204_isala_cross_8+run20201211_isala_cross_9+run20210119_isala_cross_7+Q0.Leeftijd+Q2.Q25.Cup
Contraceptive: Cup	Lactobacillus iners group	1.67936	3.49667	0.480276	0.631066	0.846216	{False: 3041, True: 2}	t22 ~lib_size+read_conc_norm+run20201009_isala_cross_1+run20201016_isala_cross_2+run20201023_isala_cross_3+run20201030_isala_cross_4+run20201106_isala_cross_5+run20201120_isala_cross_6+run20201204_isala_cross_8+run20201211_isala_cross_9+run20210119_isala_cross_7+Q0.Leeftijd+Q2.Q25.Cup
Contraceptive: Cup	Gardnerella	0.889638	3.31894	0.268049	0.78868	0.92559	{False: 3041, True: 2}	t251 ~lib_size+read_conc_norm+run20201009_isala_cross_1+run20201016_isala_cross_2+run20201023_isala_cross_3+run20201030_isala_cross_4+run20201106_isala_cross_5+run20201120_isala_cross_6+run20201204_isala_cross_8+run20201211_isala_cross_9+run20210119_isala_cross_7+Q0.Leeftijd+Q2.Q25.Cup
Contraceptive: Cup	Prevotella	3.01878	2.28833	1.31921	0.187199	0.491054	{False: 3041, True: 2}	t35 ~lib_size+read_conc_norm+run20201009_isala_cross_1+run20201016_isala_cross_2+run20201023_isala_cross_3+run20201030_isala_cross_4+run20201106_isala_cross_5+run20201120_isala_cross_6+run20201204_isala_cross_8+run20201211_isala_cross_9+run20210119_isala_cross_7+Q0.Leeftijd+Q2.Q25.Cup
Contraceptive: Cup	Lactobacillus jensenii group	-0.653244	3.28659	-0.19876	0.842464	0.943101	{False: 3041, True: 2}	t223 ~lib_size+read_conc_norm+run20201009_isala_cross_1+run20201016_isala_cross_2+run20201023_isala_cross_3+run20201030_isala_cross_4+run20201106_isala_cross_5+run20201120_isala_cross_6+run20201204_isala_cross_8+run20201211_isala_cross_9+run20210119_isala_cross_7+Q0.Leeftijd+Q2.Q25.Cup
Contraceptive: Cup	Lactobacillus gasseri group	1.88812	2.72914	0.691836	0.489094	0.769641	{False: 3041, True: 2}	t495 ~lib_size+read_conc_norm+run20201009_isala_cross_1+run20201016_isala_cross_2+run20201023_isala_cross_3+run20201030_isala_cross_4+run20201106_isala_cross_5+run20201120_isala_cross_6+run20201204_isala_cross_8+run20201211_isala_cross_9+run20210119_isala_cross_7+Q0.Leeftijd+Q2.Q25.Cup
Contraceptive: Cup	Bifidobacterium	-0.964667	1.97557	-0.488298	0.625374	0.843278	{False: 3041, True: 2}	t272 ~lib_size+read_conc_norm+run20201009_isala_cross_1+run20201016_isala_cross_2+run20201023_isala_cross_3+run20201030_isala_cross_4+run20201106_isala_cross_5+run20201120_isala_cross_6+run20201204_isala_cross_8+run20201211_isala_cross_9+run20210119_isala_cross_7+Q0.Leeftijd+Q2.Q25.Cup
Contraceptive: Cup	Anaerococcus	2.13749	2.19049	0.975803	0.32924	0.647735	{False: 3041, True: 2}	t123 ~lib_size+read_conc_norm+run20201009_isala_cross_1+run20201016_isala_cross_2+run20201023_isala_cross_3+run20201030_isala_cross_4+run20201106_isala_cross_5+run20201120_isala_cross_6+run20201204_isala_cross_8+run20201211_isala_cross_9+run20210119_isala_cross_7+Q0.Leeftijd+Q2.Q25.Cup
Contraceptive: Cup	Finegoldia	0.372289	1.88609	0.197387	0.843538	0.943252	{False: 3041, True: 2}	t472 ~lib_size+read_conc_norm+run20201009_isala_cross_1+run20201016_isala_cross_2+run20201023_isala_cross_3+run20201030_isala_cross_4+run20201106_isala_cross_5+run20201120_isala_cross_6+run20201204_isala_cross_8+run20201211_isala_cross_9+run20210119_isala_cross_7+Q0.Leeftijd+Q2.Q25.Cup
Contraceptive: Cup	Limosilactobacillus	0.736796	2.68031	0.274892	0.783418	0.923551	{False: 3041, True: 2}	t433 ~lib_size+read_conc_norm+run20201009_isala_cross_1+run20201016_isala_cross_2+run20201023_isala_cross_3+run20201030_isala_cross_4+run20201106_isala_cross_5+run20201120_isala_cross_6+run20201204_isala_cross_8+run20201211_isala_cross_9+run20210119_isala_cross_7+Q0.Leeftijd+Q2.Q25.Cup
Contraceptive: Cup	Clostridium	-0.954747	2.05738	-0.46406	0.642638	0.852273	{False: 3041, True: 2}	t444 ~lib_size+read_conc_norm+run20201009_isala_cross_1+run20201016_isala_cross_2+run20201023_isala_cross_3+run20201030_isala_cross_4+run20201106_isala_cross_5+run20201120_isala_cross_6+run20201204_isala_cross_8+run20201211_isala_cross_9+run20210119_isala_cross_7+Q0.Leeftijd+Q2.Q25.Cup
Contraceptive: Cup	Streptococcus	-2.85975	2.57064	-1.11247	0.266026	0.588412	{False: 3041, True: 2}	t11 ~lib_size+read_conc_norm+run20201009_isala_cross_1+run20201016_isala_cross_2+run20201023_isala_cross_3+run20201030_isala_cross_4+run20201106_isala_cross_5+run20201120_isala_cross_6+run20201204_isala_cross_8+run20201211_isala_cross_9+run20210119_isala_cross_7+Q0.Leeftijd+Q2.Q25.Cup
Contraceptive: Cup	eigen_AV	0.927826	4.74632	0.195483	0.845028	0.944129	{False: 3041, True: 2}	eigen_AV ~lib_size+read_conc_norm+run20201009_isala_cross_1+run20201016_isala_cross_2+run20201023_isala_cross_3+run20201030_isala_cross_4+run20201106_isala_cross_5+run20201120_isala_cross_6+run20201204_isala_cross_8+run20201211_isala_cross_9+run20210119_isala_cross_7+Q0.Leeftijd+Q2.Q25.Cup
Contraceptive: Cup	eigen_BV	4.02472	4.36465	0.922116	0.356541	0.672379	{False: 3041, True: 2}	eigen_BV ~lib_size+read_conc_norm+run20201009_isala_cross_1+run20201016_isala_cross_2+run20201023_isala_cross_3+run20201030_isala_cross_4+run20201106_isala_cross_5+run20201120_isala_cross_6+run20201204_isala_cross_8+run20201211_isala_cross_9+run20210119_isala_cross_7+Q0.Leeftijd+Q2.Q25.Cup
Contraceptive: Cup	eigen_Gut	-0.61408	1.83205	-0.335188	0.737507	0.898666	{False: 3041, True: 2}	eigen_Gut ~lib_size+read_conc_norm+run20201009_isala_cross_1+run20201016_isala_cross_2+run20201023_isala_cross_3+run20201030_isala_cross_4+run20201106_isala_cross_5+run20201120_isala_cross_6+run20201204_isala_cross_8+run20201211_isala_cross_9+run20210119_isala_cross_7+Q0.Leeftijd+Q2.Q25.Cup
Contraceptive: Cup	eigen_Lacto	0.977969	3.64604	0.268228	0.788542	0.92559	{False: 3041, True: 2}	eigen_Lacto ~lib_size+read_conc_norm+run20201009_isala_cross_1+run20201016_isala_cross_2+run20201023_isala_cross_3+run20201030_isala_cross_4+run20201106_isala_cross_5+run20201120_isala_cross_6+run20201204_isala_cross_8+run20201211_isala_cross_9+run20210119_isala_cross_7+Q0.Leeftijd+Q2.Q25.Cup
Contraceptive: Morning after pill	Lactobacillus crispatus group	1.14489	1.40168	0.816796	0.414109	0.715417	{False: 3034, True: 9}	t34 ~lib_size+read_conc_norm+run20201009_isala_cross_1+run20201016_isala_cross_2+run20201023_isala_cross_3+run20201030_isala_cross_4+run20201106_isala_cross_5+run20201120_isala_cross_6+run20201204_isala_cross_8+run20201211_isala_cross_9+run20210119_isala_cross_7+Q0.Leeftijd+Q2.Q25.Morning_after
Contraceptive: Morning after pill	Lactobacillus iners group	0.750176	1.65106	0.454359	0.649603	0.856932	{False: 3034, True: 9}	t22 ~lib_size+read_conc_norm+run20201009_isala_cross_1+run20201016_isala_cross_2+run20201023_isala_cross_3+run20201030_isala_cross_4+run20201106_isala_cross_5+run20201120_isala_cross_6+run20201204_isala_cross_8+run20201211_isala_cross_9+run20210119_isala_cross_7+Q0.Leeftijd+Q2.Q25.Morning_after
Contraceptive: Morning after pill	Gardnerella	-1.21698	1.567	-0.776633	0.437436	0.731501	{False: 3034, True: 9}	t251 ~lib_size+read_conc_norm+run20201009_isala_cross_1+run20201016_isala_cross_2+run20201023_isala_cross_3+run20201030_isala_cross_4+run20201106_isala_cross_5+run20201120_isala_cross_6+run20201204_isala_cross_8+run20201211_isala_cross_9+run20210119_isala_cross_7+Q0.Leeftijd+Q2.Q25.Morning_after
Contraceptive: Morning after pill	Prevotella	0.928921	1.08068	0.85957	0.390094	0.699574	{False: 3034, True: 9}	t35 ~lib_size+read_conc_norm+run20201009_isala_cross_1+run20201016_isala_cross_2+run20201023_isala_cross_3+run20201030_isala_cross_4+run20201106_isala_cross_5+run20201120_isala_cross_6+run20201204_isala_cross_8+run20201211_isala_cross_9+run20210119_isala_cross_7+Q0.Leeftijd+Q2.Q25.Morning_after
Contraceptive: Morning after pill	Lactobacillus jensenii group	2.13021	1.55139	1.3731	0.169824	0.467604	{False: 3034, True: 9}	t223 ~lib_size+read_conc_norm+run20201009_isala_cross_1+run20201016_isala_cross_2+run20201023_isala_cross_3+run20201030_isala_cross_4+run20201106_isala_cross_5+run20201120_isala_cross_6+run20201204_isala_cross_8+run20201211_isala_cross_9+run20210119_isala_cross_7+Q0.Leeftijd+Q2.Q25.Morning_after
Contraceptive: Morning after pill	Lactobacillus gasseri group	0.12336	1.28875	0.0957212	0.923748	0.976432	{False: 3034, True: 9}	t495 ~lib_size+read_conc_norm+run20201009_isala_cross_1+run20201016_isala_cross_2+run20201023_isala_cross_3+run20201030_isala_cross_4+run20201106_isala_cross_5+run20201120_isala_cross_6+run20201204_isala_cross_8+run20201211_isala_cross_9+run20210119_isala_cross_7+Q0.Leeftijd+Q2.Q25.Morning_after
Contraceptive: Morning after pill	Bifidobacterium	0.416477	0.932831	0.446466	0.655293	0.859287	{False: 3034, True: 9}	t272 ~lib_size+read_conc_norm+run20201009_isala_cross_1+run20201016_isala_cross_2+run20201023_isala_cross_3+run20201030_isala_cross_4+run20201106_isala_cross_5+run20201120_isala_cross_6+run20201204_isala_cross_8+run20201211_isala_cross_9+run20210119_isala_cross_7+Q0.Leeftijd+Q2.Q25.Morning_after
Contraceptive: Morning after pill	Anaerococcus	1.34072	1.03418	1.29641	0.194933	0.499341	{False: 3034, True: 9}	t123 ~lib_size+read_conc_norm+run20201009_isala_cross_1+run20201016_isala_cross_2+run20201023_isala_cross_3+run20201030_isala_cross_4+run20201106_isala_cross_5+run20201120_isala_cross_6+run20201204_isala_cross_8+run20201211_isala_cross_9+run20210119_isala_cross_7+Q0.Leeftijd+Q2.Q25.Morning_after
Contraceptive: Morning after pill	Finegoldia	1.41496	0.890209	1.58947	0.112059	0.373559	{False: 3034, True: 9}	t472 ~lib_size+read_conc_norm+run20201009_isala_cross_1+run20201016_isala_cross_2+run20201023_isala_cross_3+run20201030_isala_cross_4+run20201106_isala_cross_5+run20201120_isala_cross_6+run20201204_isala_cross_8+run20201211_isala_cross_9+run20210119_isala_cross_7+Q0.Leeftijd+Q2.Q25.Morning_after
Contraceptive: Morning after pill	Limosilactobacillus	2.19795	1.26497	1.73755	0.0823919	0.318826	{False: 3034, True: 9}	t433 ~lib_size+read_conc_norm+run20201009_isala_cross_1+run20201016_isala_cross_2+run20201023_isala_cross_3+run20201030_isala_cross_4+run20201106_isala_cross_5+run20201120_isala_cross_6+run20201204_isala_cross_8+run20201211_isala_cross_9+run20210119_isala_cross_7+Q0.Leeftijd+Q2.Q25.Morning_after
Contraceptive: Morning after pill	Clostridium	-0.320014	0.971471	-0.329412	0.741867	0.901688	{False: 3034, True: 9}	t444 ~lib_size+read_conc_norm+run20201009_isala_cross_1+run20201016_isala_cross_2+run20201023_isala_cross_3+run20201030_isala_cross_4+run20201106_isala_cross_5+run20201120_isala_cross_6+run20201204_isala_cross_8+run20201211_isala_cross_9+run20210119_isala_cross_7+Q0.Leeftijd+Q2.Q25.Morning_after
Contraceptive: Morning after pill	Streptococcus	1.0819	1.21389	0.891266	0.372857	0.68701	{False: 3034, True: 9}	t11 ~lib_size+read_conc_norm+run20201009_isala_cross_1+run20201016_isala_cross_2+run20201023_isala_cross_3+run20201030_isala_cross_4+run20201106_isala_cross_5+run20201120_isala_cross_6+run20201204_isala_cross_8+run20201211_isala_cross_9+run20210119_isala_cross_7+Q0.Leeftijd+Q2.Q25.Morning_after
Contraceptive: Morning after pill	eigen_AV	1.77844	2.2409	0.793625	0.427476	0.726079	{False: 3034, True: 9}	eigen_AV ~lib_size+read_conc_norm+run20201009_isala_cross_1+run20201016_isala_cross_2+run20201023_isala_cross_3+run20201030_isala_cross_4+run20201106_isala_cross_5+run20201120_isala_cross_6+run20201204_isala_cross_8+run20201211_isala_cross_9+run20210119_isala_cross_7+Q0.Leeftijd+Q2.Q25.Morning_after
Contraceptive: Morning after pill	eigen_BV	-2.16269	2.06082	-1.04943	0.294062	0.619045	{False: 3034, True: 9}	eigen_BV ~lib_size+read_conc_norm+run20201009_isala_cross_1+run20201016_isala_cross_2+run20201023_isala_cross_3+run20201030_isala_cross_4+run20201106_isala_cross_5+run20201120_isala_cross_6+run20201204_isala_cross_8+run20201211_isala_cross_9+run20210119_isala_cross_7+Q0.Leeftijd+Q2.Q25.Morning_after
Contraceptive: Morning after pill	eigen_Gut	-0.184929	0.865066	-0.213774	0.830738	0.939194	{False: 3034, True: 9}	eigen_Gut ~lib_size+read_conc_norm+run20201009_isala_cross_1+run20201016_isala_cross_2+run20201023_isala_cross_3+run20201030_isala_cross_4+run20201106_isala_cross_5+run20201120_isala_cross_6+run20201204_isala_cross_8+run20201211_isala_cross_9+run20210119_isala_cross_7+Q0.Leeftijd+Q2.Q25.Morning_after
Contraceptive: Morning after pill	eigen_Lacto	3.18413	1.72063	1.85056	0.0643307	0.280133	{False: 3034, True: 9}	eigen_Lacto ~lib_size+read_conc_norm+run20201009_isala_cross_1+run20201016_isala_cross_2+run20201023_isala_cross_3+run20201030_isala_cross_4+run20201106_isala_cross_5+run20201120_isala_cross_6+run20201204_isala_cross_8+run20201211_isala_cross_9+run20210119_isala_cross_7+Q0.Leeftijd+Q2.Q25.Morning_after
Contraceptive: Periodic celibacy	Lactobacillus crispatus group	-0.295143	0.565966	-0.521485	0.602067	0.836238	{False: 2987, True: 56}	t34 ~lib_size+read_conc_norm+run20201009_isala_cross_1+run20201016_isala_cross_2+run20201023_isala_cross_3+run20201030_isala_cross_4+run20201106_isala_cross_5+run20201120_isala_cross_6+run20201204_isala_cross_8+run20201211_isala_cross_9+run20210119_isala_cross_7+Q0.Leeftijd+Q2.Q25.Periodic_celibacy
Contraceptive: Periodic celibacy	Lactobacillus iners group	0.462864	0.666587	0.694379	0.487498	0.768884	{False: 2987, True: 56}	t22 ~lib_size+read_conc_norm+run20201009_isala_cross_1+run20201016_isala_cross_2+run20201023_isala_cross_3+run20201030_isala_cross_4+run20201106_isala_cross_5+run20201120_isala_cross_6+run20201204_isala_cross_8+run20201211_isala_cross_9+run20210119_isala_cross_7+Q0.Leeftijd+Q2.Q25.Periodic_celibacy
Contraceptive: Periodic celibacy	Gardnerella	1.09903	0.632424	1.73781	0.0823458	0.318798	{False: 2987, True: 56}	t251 ~lib_size+read_conc_norm+run20201009_isala_cross_1+run20201016_isala_cross_2+run20201023_isala_cross_3+run20201030_isala_cross_4+run20201106_isala_cross_5+run20201120_isala_cross_6+run20201204_isala_cross_8+run20201211_isala_cross_9+run20210119_isala_cross_7+Q0.Leeftijd+Q2.Q25.Periodic_celibacy
Contraceptive: Periodic celibacy	Prevotella	-0.0144289	0.436378	-0.033065	0.973625	0.991978	{False: 2987, True: 56}	t35 ~lib_size+read_conc_norm+run20201009_isala_cross_1+run20201016_isala_cross_2+run20201023_isala_cross_3+run20201030_isala_cross_4+run20201106_isala_cross_5+run20201120_isala_cross_6+run20201204_isala_cross_8+run20201211_isala_cross_9+run20210119_isala_cross_7+Q0.Leeftijd+Q2.Q25.Periodic_celibacy
Contraceptive: Periodic celibacy	Lactobacillus jensenii group	-0.0726322	0.626568	-0.115921	0.907723	0.970229	{False: 2987, True: 56}	t223 ~lib_size+read_conc_norm+run20201009_isala_cross_1+run20201016_isala_cross_2+run20201023_isala_cross_3+run20201030_isala_cross_4+run20201106_isala_cross_5+run20201120_isala_cross_6+run20201204_isala_cross_8+run20201211_isala_cross_9+run20210119_isala_cross_7+Q0.Leeftijd+Q2.Q25.Periodic_celibacy
Contraceptive: Periodic celibacy	Lactobacillus gasseri group	1.1538	0.51991	2.21924	0.0265445	0.162642	{False: 2987, True: 56}	t495 ~lib_size+read_conc_norm+run20201009_isala_cross_1+run20201016_isala_cross_2+run20201023_isala_cross_3+run20201030_isala_cross_4+run20201106_isala_cross_5+run20201120_isala_cross_6+run20201204_isala_cross_8+run20201211_isala_cross_9+run20210119_isala_cross_7+Q0.Leeftijd+Q2.Q25.Periodic_celibacy
Contraceptive: Periodic celibacy	Bifidobacterium	0.346579	0.37659	0.920307	0.357485	0.673533	{False: 2987, True: 56}	t272 ~lib_size+read_conc_norm+run20201009_isala_cross_1+run20201016_isala_cross_2+run20201023_isala_cross_3+run20201030_isala_cross_4+run20201106_isala_cross_5+run20201120_isala_cross_6+run20201204_isala_cross_8+run20201211_isala_cross_9+run20210119_isala_cross_7+Q0.Leeftijd+Q2.Q25.Periodic_celibacy
Contraceptive: Periodic celibacy	Anaerococcus	0.24311	0.417643	0.582098	0.560544	0.812423	{False: 2987, True: 56}	t123 ~lib_size+read_conc_norm+run20201009_isala_cross_1+run20201016_isala_cross_2+run20201023_isala_cross_3+run20201030_isala_cross_4+run20201106_isala_cross_5+run20201120_isala_cross_6+run20201204_isala_cross_8+run20201211_isala_cross_9+run20210119_isala_cross_7+Q0.Leeftijd+Q2.Q25.Periodic_celibacy
Contraceptive: Periodic celibacy	Finegoldia	-0.016041	0.359571	-0.0446114	0.96442	0.989545	{False: 2987, True: 56}	t472 ~lib_size+read_conc_norm+run20201009_isala_cross_1+run20201016_isala_cross_2+run20201023_isala_cross_3+run20201030_isala_cross_4+run20201106_isala_cross_5+run20201120_isala_cross_6+run20201204_isala_cross_8+run20201211_isala_cross_9+run20210119_isala_cross_7+Q0.Leeftijd+Q2.Q25.Periodic_celibacy
Contraceptive: Periodic celibacy	Limosilactobacillus	-0.474378	0.510915	-0.928487	0.353229	0.67047	{False: 2987, True: 56}	t433 ~lib_size+read_conc_norm+run20201009_isala_cross_1+run20201016_isala_cross_2+run20201023_isala_cross_3+run20201030_isala_cross_4+run20201106_isala_cross_5+run20201120_isala_cross_6+run20201204_isala_cross_8+run20201211_isala_cross_9+run20210119_isala_cross_7+Q0.Leeftijd+Q2.Q25.Periodic_celibacy
Contraceptive: Periodic celibacy	Clostridium	-0.0816612	0.392236	-0.208194	0.835091	0.941525	{False: 2987, True: 56}	t444 ~lib_size+read_conc_norm+run20201009_isala_cross_1+run20201016_isala_cross_2+run20201023_isala_cross_3+run20201030_isala_cross_4+run20201106_isala_cross_5+run20201120_isala_cross_6+run20201204_isala_cross_8+run20201211_isala_cross_9+run20210119_isala_cross_7+Q0.Leeftijd+Q2.Q25.Periodic_celibacy
Contraceptive: Periodic celibacy	Streptococcus	0.165409	0.490164	0.337457	0.735796	0.897745	{False: 2987, True: 56}	t11 ~lib_size+read_conc_norm+run20201009_isala_cross_1+run20201016_isala_cross_2+run20201023_isala_cross_3+run20201030_isala_cross_4+run20201106_isala_cross_5+run20201120_isala_cross_6+run20201204_isala_cross_8+run20201211_isala_cross_9+run20210119_isala_cross_7+Q0.Leeftijd+Q2.Q25.Periodic_celibacy
Contraceptive: Periodic celibacy	eigen_AV	0.0691223	0.904857	0.0763903	0.939114	0.981045	{False: 2987, True: 56}	eigen_AV ~lib_size+read_conc_norm+run20201009_isala_cross_1+run20201016_isala_cross_2+run20201023_isala_cross_3+run20201030_isala_cross_4+run20201106_isala_cross_5+run20201120_isala_cross_6+run20201204_isala_cross_8+run20201211_isala_cross_9+run20210119_isala_cross_7+Q0.Leeftijd+Q2.Q25.Periodic_celibacy
Contraceptive: Periodic celibacy	eigen_BV	1.21326	0.831914	1.4584	0.144834	0.43129	{False: 2987, True: 56}	eigen_BV ~lib_size+read_conc_norm+run20201009_isala_cross_1+run20201016_isala_cross_2+run20201023_isala_cross_3+run20201030_isala_cross_4+run20201106_isala_cross_5+run20201120_isala_cross_6+run20201204_isala_cross_8+run20201211_isala_cross_9+run20210119_isala_cross_7+Q0.Leeftijd+Q2.Q25.Periodic_celibacy
Contraceptive: Periodic celibacy	eigen_Gut	-0.170996	0.349259	-0.489596	0.624455	0.843239	{False: 2987, True: 56}	eigen_Gut ~lib_size+read_conc_norm+run20201009_isala_cross_1+run20201016_isala_cross_2+run20201023_isala_cross_3+run20201030_isala_cross_4+run20201106_isala_cross_5+run20201120_isala_cross_6+run20201204_isala_cross_8+run20201211_isala_cross_9+run20210119_isala_cross_7+Q0.Leeftijd+Q2.Q25.Periodic_celibacy
Contraceptive: Periodic celibacy	eigen_Lacto	-0.43799	0.695053	-0.630153	0.528642	0.793724	{False: 2987, True: 56}	eigen_Lacto ~lib_size+read_conc_norm+run20201009_isala_cross_1+run20201016_isala_cross_2+run20201023_isala_cross_3+run20201030_isala_cross_4+run20201106_isala_cross_5+run20201120_isala_cross_6+run20201204_isala_cross_8+run20201211_isala_cross_9+run20210119_isala_cross_7+Q0.Leeftijd+Q2.Q25.Periodic_celibacy
Contraceptive: Pullout method	Lactobacillus crispatus group	-0.167122	0.365215	-0.457598	0.647274	0.855321	{False: 2904, True: 139}	t34 ~lib_size+read_conc_norm+run20201009_isala_cross_1+run20201016_isala_cross_2+run20201023_isala_cross_3+run20201030_isala_cross_4+run20201106_isala_cross_5+run20201120_isala_cross_6+run20201204_isala_cross_8+run20201211_isala_cross_9+run20210119_isala_cross_7+Q0.Leeftijd+Q2.Q25.Pullout
Contraceptive: Pullout method	Lactobacillus iners group	0.627644	0.430024	1.45956	0.144516	0.43097	{False: 2904, True: 139}	t22 ~lib_size+read_conc_norm+run20201009_isala_cross_1+run20201016_isala_cross_2+run20201023_isala_cross_3+run20201030_isala_cross_4+run20201106_isala_cross_5+run20201120_isala_cross_6+run20201204_isala_cross_8+run20201211_isala_cross_9+run20210119_isala_cross_7+Q0.Leeftijd+Q2.Q25.Pullout
Contraceptive: Pullout method	Gardnerella	0.185284	0.408286	0.453811	0.649998	0.857038	{False: 2904, True: 139}	t251 ~lib_size+read_conc_norm+run20201009_isala_cross_1+run20201016_isala_cross_2+run20201023_isala_cross_3+run20201030_isala_cross_4+run20201106_isala_cross_5+run20201120_isala_cross_6+run20201204_isala_cross_8+run20201211_isala_cross_9+run20210119_isala_cross_7+Q0.Leeftijd+Q2.Q25.Pullout
Contraceptive: Pullout method	Prevotella	-0.0463589	0.281589	-0.164633	0.869244	0.954075	{False: 2904, True: 139}	t35 ~lib_size+read_conc_norm+run20201009_isala_cross_1+run20201016_isala_cross_2+run20201023_isala_cross_3+run20201030_isala_cross_4+run20201106_isala_cross_5+run20201120_isala_cross_6+run20201204_isala_cross_8+run20201211_isala_cross_9+run20210119_isala_cross_7+Q0.Leeftijd+Q2.Q25.Pullout
Contraceptive: Pullout method	Lactobacillus jensenii group	0.267858	0.404289	0.662541	0.507675	0.78189	{False: 2904, True: 139}	t223 ~lib_size+read_conc_norm+run20201009_isala_cross_1+run20201016_isala_cross_2+run20201023_isala_cross_3+run20201030_isala_cross_4+run20201106_isala_cross_5+run20201120_isala_cross_6+run20201204_isala_cross_8+run20201211_isala_cross_9+run20210119_isala_cross_7+Q0.Leeftijd+Q2.Q25.Pullout
Contraceptive: Pullout method	Lactobacillus gasseri group	-0.201742	0.335745	-0.600878	0.547966	0.804613	{False: 2904, True: 139}	t495 ~lib_size+read_conc_norm+run20201009_isala_cross_1+run20201016_isala_cross_2+run20201023_isala_cross_3+run20201030_isala_cross_4+run20201106_isala_cross_5+run20201120_isala_cross_6+run20201204_isala_cross_8+run20201211_isala_cross_9+run20210119_isala_cross_7+Q0.Leeftijd+Q2.Q25.Pullout
Contraceptive: Pullout method	Bifidobacterium	-0.16214	0.243026	-0.667174	0.504712	0.779671	{False: 2904, True: 139}	t272 ~lib_size+read_conc_norm+run20201009_isala_cross_1+run20201016_isala_cross_2+run20201023_isala_cross_3+run20201030_isala_cross_4+run20201106_isala_cross_5+run20201120_isala_cross_6+run20201204_isala_cross_8+run20201211_isala_cross_9+run20210119_isala_cross_7+Q0.Leeftijd+Q2.Q25.Pullout
Contraceptive: Pullout method	Anaerococcus	-0.0270523	0.269515	-0.100374	0.920054	0.975747	{False: 2904, True: 139}	t123 ~lib_size+read_conc_norm+run20201009_isala_cross_1+run20201016_isala_cross_2+run20201023_isala_cross_3+run20201030_isala_cross_4+run20201106_isala_cross_5+run20201120_isala_cross_6+run20201204_isala_cross_8+run20201211_isala_cross_9+run20210119_isala_cross_7+Q0.Leeftijd+Q2.Q25.Pullout
Contraceptive: Pullout method	Finegoldia	-0.0896487	0.232022	-0.38638	0.699242	0.882451	{False: 2904, True: 139}	t472 ~lib_size+read_conc_norm+run20201009_isala_cross_1+run20201016_isala_cross_2+run20201023_isala_cross_3+run20201030_isala_cross_4+run20201106_isala_cross_5+run20201120_isala_cross_6+run20201204_isala_cross_8+run20201211_isala_cross_9+run20210119_isala_cross_7+Q0.Leeftijd+Q2.Q25.Pullout
Contraceptive: Pullout method	Limosilactobacillus	0.714044	0.32948	2.16719	0.0302982	0.178692	{False: 2904, True: 139}	t433 ~lib_size+read_conc_norm+run20201009_isala_cross_1+run20201016_isala_cross_2+run20201023_isala_cross_3+run20201030_isala_cross_4+run20201106_isala_cross_5+run20201120_isala_cross_6+run20201204_isala_cross_8+run20201211_isala_cross_9+run20210119_isala_cross_7+Q0.Leeftijd+Q2.Q25.Pullout
Contraceptive: Pullout method	Clostridium	-0.0864602	0.253102	-0.341602	0.732674	0.896821	{False: 2904, True: 139}	t444 ~lib_size+read_conc_norm+run20201009_isala_cross_1+run20201016_isala_cross_2+run20201023_isala_cross_3+run20201030_isala_cross_4+run20201106_isala_cross_5+run20201120_isala_cross_6+run20201204_isala_cross_8+run20201211_isala_cross_9+run20210119_isala_cross_7+Q0.Leeftijd+Q2.Q25.Pullout
Contraceptive: Pullout method	Streptococcus	0.212675	0.31628	0.672425	0.501364	0.77743	{False: 2904, True: 139}	t11 ~lib_size+read_conc_norm+run20201009_isala_cross_1+run20201016_isala_cross_2+run20201023_isala_cross_3+run20201030_isala_cross_4+run20201106_isala_cross_5+run20201120_isala_cross_6+run20201204_isala_cross_8+run20201211_isala_cross_9+run20210119_isala_cross_7+Q0.Leeftijd+Q2.Q25.Pullout
Contraceptive: Pullout method	eigen_AV	-0.494627	0.583826	-0.847217	0.396941	0.704619	{False: 2904, True: 139}	eigen_AV ~lib_size+read_conc_norm+run20201009_isala_cross_1+run20201016_isala_cross_2+run20201023_isala_cross_3+run20201030_isala_cross_4+run20201106_isala_cross_5+run20201120_isala_cross_6+run20201204_isala_cross_8+run20201211_isala_cross_9+run20210119_isala_cross_7+Q0.Leeftijd+Q2.Q25.Pullout
Contraceptive: Pullout method	eigen_BV	-0.0843365	0.537011	-0.157048	0.875218	0.957477	{False: 2904, True: 139}	eigen_BV ~lib_size+read_conc_norm+run20201009_isala_cross_1+run20201016_isala_cross_2+run20201023_isala_cross_3+run20201030_isala_cross_4+run20201106_isala_cross_5+run20201120_isala_cross_6+run20201204_isala_cross_8+run20201211_isala_cross_9+run20210119_isala_cross_7+Q0.Leeftijd+Q2.Q25.Pullout
Contraceptive: Pullout method	eigen_Gut	-0.513693	0.225189	-2.28116	0.0226078	0.149372	{False: 2904, True: 139}	eigen_Gut ~lib_size+read_conc_norm+run20201009_isala_cross_1+run20201016_isala_cross_2+run20201023_isala_cross_3+run20201030_isala_cross_4+run20201106_isala_cross_5+run20201120_isala_cross_6+run20201204_isala_cross_8+run20201211_isala_cross_9+run20210119_isala_cross_7+Q0.Leeftijd+Q2.Q25.Pullout
Contraceptive: Pullout method	eigen_Lacto	0.468183	0.448459	1.04398	0.296577	0.620895	{False: 2904, True: 139}	eigen_Lacto ~lib_size+read_conc_norm+run20201009_isala_cross_1+run20201016_isala_cross_2+run20201023_isala_cross_3+run20201030_isala_cross_4+run20201106_isala_cross_5+run20201120_isala_cross_6+run20201204_isala_cross_8+run20201211_isala_cross_9+run20210119_isala_cross_7+Q0.Leeftijd+Q2.Q25.Pullout
Contraceptive: Sterlized	Lactobacillus crispatus group	0.724308	0.763977	0.948075	0.343167	0.65903	{False: 3012, True: 31}	t34 ~lib_size+read_conc_norm+run20201009_isala_cross_1+run20201016_isala_cross_2+run20201023_isala_cross_3+run20201030_isala_cross_4+run20201106_isala_cross_5+run20201120_isala_cross_6+run20201204_isala_cross_8+run20201211_isala_cross_9+run20210119_isala_cross_7+Q0.Leeftijd+Q2.Q25.Sterilized
Contraceptive: Sterlized	Lactobacillus iners group	-1.27884	0.899667	-1.42146	0.155285	0.445412	{False: 3012, True: 31}	t22 ~lib_size+read_conc_norm+run20201009_isala_cross_1+run20201016_isala_cross_2+run20201023_isala_cross_3+run20201030_isala_cross_4+run20201106_isala_cross_5+run20201120_isala_cross_6+run20201204_isala_cross_8+run20201211_isala_cross_9+run20210119_isala_cross_7+Q0.Leeftijd+Q2.Q25.Sterilized
Contraceptive: Sterlized	Gardnerella	1.25195	0.853897	1.46615	0.14271	0.429683	{False: 3012, True: 31}	t251 ~lib_size+read_conc_norm+run20201009_isala_cross_1+run20201016_isala_cross_2+run20201023_isala_cross_3+run20201030_isala_cross_4+run20201106_isala_cross_5+run20201120_isala_cross_6+run20201204_isala_cross_8+run20201211_isala_cross_9+run20210119_isala_cross_7+Q0.Leeftijd+Q2.Q25.Sterilized
Contraceptive: Sterlized	Prevotella	0.865228	0.588903	1.46922	0.141877	0.42793	{False: 3012, True: 31}	t35 ~lib_size+read_conc_norm+run20201009_isala_cross_1+run20201016_isala_cross_2+run20201023_isala_cross_3+run20201030_isala_cross_4+run20201106_isala_cross_5+run20201120_isala_cross_6+run20201204_isala_cross_8+run20201211_isala_cross_9+run20210119_isala_cross_7+Q0.Leeftijd+Q2.Q25.Sterilized
Contraceptive: Sterlized	Lactobacillus jensenii group	-0.451712	0.845832	-0.534045	0.59335	0.832003	{False: 3012, True: 31}	t223 ~lib_size+read_conc_norm+run20201009_isala_cross_1+run20201016_isala_cross_2+run20201023_isala_cross_3+run20201030_isala_cross_4+run20201106_isala_cross_5+run20201120_isala_cross_6+run20201204_isala_cross_8+run20201211_isala_cross_9+run20210119_isala_cross_7+Q0.Leeftijd+Q2.Q25.Sterilized
Contraceptive: Sterlized	Lactobacillus gasseri group	0.399063	0.702414	0.568131	0.569988	0.816588	{False: 3012, True: 31}	t495 ~lib_size+read_conc_norm+run20201009_isala_cross_1+run20201016_isala_cross_2+run20201023_isala_cross_3+run20201030_isala_cross_4+run20201106_isala_cross_5+run20201120_isala_cross_6+run20201204_isala_cross_8+run20201211_isala_cross_9+run20210119_isala_cross_7+Q0.Leeftijd+Q2.Q25.Sterilized
Contraceptive: Sterlized	Bifidobacterium	0.143325	0.508463	0.281879	0.778056	0.92084	{False: 3012, True: 31}	t272 ~lib_size+read_conc_norm+run20201009_isala_cross_1+run20201016_isala_cross_2+run20201023_isala_cross_3+run20201030_isala_cross_4+run20201106_isala_cross_5+run20201120_isala_cross_6+run20201204_isala_cross_8+run20201211_isala_cross_9+run20210119_isala_cross_7+Q0.Leeftijd+Q2.Q25.Sterilized
Contraceptive: Sterlized	Anaerococcus	0.615423	0.563741	1.09168	0.275062	0.597695	{False: 3012, True: 31}	t123 ~lib_size+read_conc_norm+run20201009_isala_cross_1+run20201016_isala_cross_2+run20201023_isala_cross_3+run20201030_isala_cross_4+run20201106_isala_cross_5+run20201120_isala_cross_6+run20201204_isala_cross_8+run20201211_isala_cross_9+run20210119_isala_cross_7+Q0.Leeftijd+Q2.Q25.Sterilized
Contraceptive: Sterlized	Finegoldia	0.418825	0.485364	0.862909	0.388256	0.698359	{False: 3012, True: 31}	t472 ~lib_size+read_conc_norm+run20201009_isala_cross_1+run20201016_isala_cross_2+run20201023_isala_cross_3+run20201030_isala_cross_4+run20201106_isala_cross_5+run20201120_isala_cross_6+run20201204_isala_cross_8+run20201211_isala_cross_9+run20210119_isala_cross_7+Q0.Leeftijd+Q2.Q25.Sterilized
Contraceptive: Sterlized	Limosilactobacillus	0.422097	0.689793	0.611919	0.540637	0.799812	{False: 3012, True: 31}	t433 ~lib_size+read_conc_norm+run20201009_isala_cross_1+run20201016_isala_cross_2+run20201023_isala_cross_3+run20201030_isala_cross_4+run20201106_isala_cross_5+run20201120_isala_cross_6+run20201204_isala_cross_8+run20201211_isala_cross_9+run20210119_isala_cross_7+Q0.Leeftijd+Q2.Q25.Sterilized
Contraceptive: Sterlized	Clostridium	-0.457342	0.529459	-0.863791	0.387771	0.698359	{False: 3012, True: 31}	t444 ~lib_size+read_conc_norm+run20201009_isala_cross_1+run20201016_isala_cross_2+run20201023_isala_cross_3+run20201030_isala_cross_4+run20201106_isala_cross_5+run20201120_isala_cross_6+run20201204_isala_cross_8+run20201211_isala_cross_9+run20210119_isala_cross_7+Q0.Leeftijd+Q2.Q25.Sterilized
Contraceptive: Sterlized	Streptococcus	0.346281	0.661706	0.523315	0.600793	0.835744	{False: 3012, True: 31}	t11 ~lib_size+read_conc_norm+run20201009_isala_cross_1+run20201016_isala_cross_2+run20201023_isala_cross_3+run20201030_isala_cross_4+run20201106_isala_cross_5+run20201120_isala_cross_6+run20201204_isala_cross_8+run20201211_isala_cross_9+run20210119_isala_cross_7+Q0.Leeftijd+Q2.Q25.Sterilized
Contraceptive: Sterlized	eigen_AV	1.12559	1.22139	0.921562	0.35683	0.672763	{False: 3012, True: 31}	eigen_AV ~lib_size+read_conc_norm+run20201009_isala_cross_1+run20201016_isala_cross_2+run20201023_isala_cross_3+run20201030_isala_cross_4+run20201106_isala_cross_5+run20201120_isala_cross_6+run20201204_isala_cross_8+run20201211_isala_cross_9+run20210119_isala_cross_7+Q0.Leeftijd+Q2.Q25.Sterilized
Contraceptive: Sterlized	eigen_BV	1.84845	1.12298	1.64603	0.0998622	0.351556	{False: 3012, True: 31}	eigen_BV ~lib_size+read_conc_norm+run20201009_isala_cross_1+run20201016_isala_cross_2+run20201023_isala_cross_3+run20201030_isala_cross_4+run20201106_isala_cross_5+run20201120_isala_cross_6+run20201204_isala_cross_8+run20201211_isala_cross_9+run20210119_isala_cross_7+Q0.Leeftijd+Q2.Q25.Sterilized
Contraceptive: Sterlized	eigen_Gut	-0.241685	0.4715	-0.512588	0.608277	0.837642	{False: 3012, True: 31}	eigen_Gut ~lib_size+read_conc_norm+run20201009_isala_cross_1+run20201016_isala_cross_2+run20201023_isala_cross_3+run20201030_isala_cross_4+run20201106_isala_cross_5+run20201120_isala_cross_6+run20201204_isala_cross_8+run20201211_isala_cross_9+run20210119_isala_cross_7+Q0.Leeftijd+Q2.Q25.Sterilized
Contraceptive: Sterlized	eigen_Lacto	0.254291	0.938375	0.270991	0.786416	0.924426	{False: 3012, True: 31}	eigen_Lacto ~lib_size+read_conc_norm+run20201009_isala_cross_1+run20201016_isala_cross_2+run20201023_isala_cross_3+run20201030_isala_cross_4+run20201106_isala_cross_5+run20201120_isala_cross_6+run20201204_isala_cross_8+run20201211_isala_cross_9+run20210119_isala_cross_7+Q0.Leeftijd+Q2.Q25.Sterilized
Contraceptive: Partner sterlized	Lactobacillus crispatus group	-1.46287	0.618318	-2.36589	0.0180494	0.130277	{False: 2996, True: 47}	t34 ~lib_size+read_conc_norm+run20201009_isala_cross_1+run20201016_isala_cross_2+run20201023_isala_cross_3+run20201030_isala_cross_4+run20201106_isala_cross_5+run20201120_isala_cross_6+run20201204_isala_cross_8+run20201211_isala_cross_9+run20210119_isala_cross_7+Q0.Leeftijd+Q2.Q25.Partner_sterilized
Contraceptive: Partner sterlized	Lactobacillus iners group	-1.34328	0.728535	-1.84382	0.0653077	0.282173	{False: 2996, True: 47}	t22 ~lib_size+read_conc_norm+run20201009_isala_cross_1+run20201016_isala_cross_2+run20201023_isala_cross_3+run20201030_isala_cross_4+run20201106_isala_cross_5+run20201120_isala_cross_6+run20201204_isala_cross_8+run20201211_isala_cross_9+run20210119_isala_cross_7+Q0.Leeftijd+Q2.Q25.Partner_sterilized
Contraceptive: Partner sterlized	Gardnerella	-1.0917	0.69159	-1.57854	0.114546	0.377003	{False: 2996, True: 47}	t251 ~lib_size+read_conc_norm+run20201009_isala_cross_1+run20201016_isala_cross_2+run20201023_isala_cross_3+run20201030_isala_cross_4+run20201106_isala_cross_5+run20201120_isala_cross_6+run20201204_isala_cross_8+run20201211_isala_cross_9+run20210119_isala_cross_7+Q0.Leeftijd+Q2.Q25.Partner_sterilized
Contraceptive: Partner sterlized	Prevotella	0.213825	0.477147	0.448132	0.65409	0.859254	{False: 2996, True: 47}	t35 ~lib_size+read_conc_norm+run20201009_isala_cross_1+run20201016_isala_cross_2+run20201023_isala_cross_3+run20201030_isala_cross_4+run20201106_isala_cross_5+run20201120_isala_cross_6+run20201204_isala_cross_8+run20201211_isala_cross_9+run20210119_isala_cross_7+Q0.Leeftijd+Q2.Q25.Partner_sterilized
Contraceptive: Partner sterlized	Lactobacillus jensenii group	0.180256	0.68512	0.263101	0.79249	0.926937	{False: 2996, True: 47}	t223 ~lib_size+read_conc_norm+run20201009_isala_cross_1+run20201016_isala_cross_2+run20201023_isala_cross_3+run20201030_isala_cross_4+run20201106_isala_cross_5+run20201120_isala_cross_6+run20201204_isala_cross_8+run20201211_isala_cross_9+run20210119_isala_cross_7+Q0.Leeftijd+Q2.Q25.Partner_sterilized
Contraceptive: Partner sterlized	Lactobacillus gasseri group	2.14271	0.567629	3.77485	0.000163176	0.00395484	{False: 2996, True: 47}	t495 ~lib_size+read_conc_norm+run20201009_isala_cross_1+run20201016_isala_cross_2+run20201023_isala_cross_3+run20201030_isala_cross_4+run20201106_isala_cross_5+run20201120_isala_cross_6+run20201204_isala_cross_8+run20201211_isala_cross_9+run20210119_isala_cross_7+Q0.Leeftijd+Q2.Q25.Partner_sterilized
Contraceptive: Partner sterlized	Bifidobacterium	1.80679	0.410534	4.40107	1.1144e-05	0.000449714	{False: 2996, True: 47}	t272 ~lib_size+read_conc_norm+run20201009_isala_cross_1+run20201016_isala_cross_2+run20201023_isala_cross_3+run20201030_isala_cross_4+run20201106_isala_cross_5+run20201120_isala_cross_6+run20201204_isala_cross_8+run20201211_isala_cross_9+run20210119_isala_cross_7+Q0.Leeftijd+Q2.Q25.Partner_sterilized
Contraceptive: Partner sterlized	Anaerococcus	-0.10525	0.456698	-0.230459	0.817751	0.935224	{False: 2996, True: 47}	t123 ~lib_size+read_conc_norm+run20201009_isala_cross_1+run20201016_isala_cross_2+run20201023_isala_cross_3+run20201030_isala_cross_4+run20201106_isala_cross_5+run20201120_isala_cross_6+run20201204_isala_cross_8+run20201211_isala_cross_9+run20210119_isala_cross_7+Q0.Leeftijd+Q2.Q25.Partner_sterilized
Contraceptive: Partner sterlized	Finegoldia	-0.210995	0.393158	-0.536667	0.591537	0.830625	{False: 2996, True: 47}	t472 ~lib_size+read_conc_norm+run20201009_isala_cross_1+run20201016_isala_cross_2+run20201023_isala_cross_3+run20201030_isala_cross_4+run20201106_isala_cross_5+run20201120_isala_cross_6+run20201204_isala_cross_8+run20201211_isala_cross_9+run20210119_isala_cross_7+Q0.Leeftijd+Q2.Q25.Partner_sterilized
Contraceptive: Partner sterlized	Limosilactobacillus	-0.697719	0.558601	-1.24905	0.211744	0.521637	{False: 2996, True: 47}	t433 ~lib_size+read_conc_norm+run20201009_isala_cross_1+run20201016_isala_cross_2+run20201023_isala_cross_3+run20201030_isala_cross_4+run20201106_isala_cross_5+run20201120_isala_cross_6+run20201204_isala_cross_8+run20201211_isala_cross_9+run20210119_isala_cross_7+Q0.Leeftijd+Q2.Q25.Partner_sterilized
Contraceptive: Partner sterlized	Clostridium	0.37368	0.428843	0.871368	0.383623	0.695925	{False: 2996, True: 47}	t444 ~lib_size+read_conc_norm+run20201009_isala_cross_1+run20201016_isala_cross_2+run20201023_isala_cross_3+run20201030_isala_cross_4+run20201106_isala_cross_5+run20201120_isala_cross_6+run20201204_isala_cross_8+run20201211_isala_cross_9+run20210119_isala_cross_7+Q0.Leeftijd+Q2.Q25.Partner_sterilized
Contraceptive: Partner sterlized	Streptococcus	1.45929	0.535329	2.72597	0.00644815	0.064576	{False: 2996, True: 47}	t11 ~lib_size+read_conc_norm+run20201009_isala_cross_1+run20201016_isala_cross_2+run20201023_isala_cross_3+run20201030_isala_cross_4+run20201106_isala_cross_5+run20201120_isala_cross_6+run20201204_isala_cross_8+run20201211_isala_cross_9+run20210119_isala_cross_7+Q0.Leeftijd+Q2.Q25.Partner_sterilized
Contraceptive: Partner sterlized	eigen_AV	0.0924188	0.989424	0.0934066	0.925587	0.976714	{False: 2996, True: 47}	eigen_AV ~lib_size+read_conc_norm+run20201009_isala_cross_1+run20201016_isala_cross_2+run20201023_isala_cross_3+run20201030_isala_cross_4+run20201106_isala_cross_5+run20201120_isala_cross_6+run20201204_isala_cross_8+run20201211_isala_cross_9+run20210119_isala_cross_7+Q0.Leeftijd+Q2.Q25.Partner_sterilized
Contraceptive: Partner sterlized	eigen_BV	-1.39159	0.909633	-1.52983	0.126163	0.399816	{False: 2996, True: 47}	eigen_BV ~lib_size+read_conc_norm+run20201009_isala_cross_1+run20201016_isala_cross_2+run20201023_isala_cross_3+run20201030_isala_cross_4+run20201106_isala_cross_5+run20201120_isala_cross_6+run20201204_isala_cross_8+run20201211_isala_cross_9+run20210119_isala_cross_7+Q0.Leeftijd+Q2.Q25.Partner_sterilized
Contraceptive: Partner sterlized	eigen_Gut	-0.200056	0.381899	-0.523845	0.600424	0.835373	{False: 2996, True: 47}	eigen_Gut ~lib_size+read_conc_norm+run20201009_isala_cross_1+run20201016_isala_cross_2+run20201023_isala_cross_3+run20201030_isala_cross_4+run20201106_isala_cross_5+run20201120_isala_cross_6+run20201204_isala_cross_8+run20201211_isala_cross_9+run20210119_isala_cross_7+Q0.Leeftijd+Q2.Q25.Partner_sterilized
Contraceptive: Partner sterlized	eigen_Lacto	-0.951415	0.759866	-1.25208	0.210636	0.520523	{False: 2996, True: 47}	eigen_Lacto ~lib_size+read_conc_norm+run20201009_isala_cross_1+run20201016_isala_cross_2+run20201023_isala_cross_3+run20201030_isala_cross_4+run20201106_isala_cross_5+run20201120_isala_cross_6+run20201204_isala_cross_8+run20201211_isala_cross_9+run20210119_isala_cross_7+Q0.Leeftijd+Q2.Q25.Partner_sterilized
Born with vaginal birth	Lactobacillus crispatus group	0.286284	0.246351	1.1621	0.245288	0.562541	{True: 2714, False: 329}	t34 ~lib_size+read_conc_norm+run20201009_isala_cross_1+run20201016_isala_cross_2+run20201023_isala_cross_3+run20201030_isala_cross_4+run20201106_isala_cross_5+run20201120_isala_cross_6+run20201204_isala_cross_8+run20201211_isala_cross_9+run20210119_isala_cross_7+Q0.Leeftijd+Q1.Q32.Born_vaginal
Born with vaginal birth	Lactobacillus iners group	-0.0569823	0.290222	-0.19634	0.844357	0.94391	{True: 2714, False: 329}	t22 ~lib_size+read_conc_norm+run20201009_isala_cross_1+run20201016_isala_cross_2+run20201023_isala_cross_3+run20201030_isala_cross_4+run20201106_isala_cross_5+run20201120_isala_cross_6+run20201204_isala_cross_8+run20201211_isala_cross_9+run20210119_isala_cross_7+Q0.Leeftijd+Q1.Q32.Born_vaginal
Born with vaginal birth	Gardnerella	-0.215964	0.275437	-0.784076	0.433057	0.730568	{True: 2714, False: 329}	t251 ~lib_size+read_conc_norm+run20201009_isala_cross_1+run20201016_isala_cross_2+run20201023_isala_cross_3+run20201030_isala_cross_4+run20201106_isala_cross_5+run20201120_isala_cross_6+run20201204_isala_cross_8+run20201211_isala_cross_9+run20210119_isala_cross_7+Q0.Leeftijd+Q1.Q32.Born_vaginal
Born with vaginal birth	Prevotella	-0.000165834	0.189979	-0.000872908	0.999304	0.999914	{True: 2714, False: 329}	t35 ~lib_size+read_conc_norm+run20201009_isala_cross_1+run20201016_isala_cross_2+run20201023_isala_cross_3+run20201030_isala_cross_4+run20201106_isala_cross_5+run20201120_isala_cross_6+run20201204_isala_cross_8+run20201211_isala_cross_9+run20210119_isala_cross_7+Q0.Leeftijd+Q1.Q32.Born_vaginal
Born with vaginal birth	Lactobacillus jensenii group	0.0822456	0.272775	0.301515	0.763043	0.911231	{True: 2714, False: 329}	t223 ~lib_size+read_conc_norm+run20201009_isala_cross_1+run20201016_isala_cross_2+run20201023_isala_cross_3+run20201030_isala_cross_4+run20201106_isala_cross_5+run20201120_isala_cross_6+run20201204_isala_cross_8+run20201211_isala_cross_9+run20210119_isala_cross_7+Q0.Leeftijd+Q1.Q32.Born_vaginal
Born with vaginal birth	Lactobacillus gasseri group	-0.265994	0.226477	-1.17449	0.240292	0.556537	{True: 2714, False: 329}	t495 ~lib_size+read_conc_norm+run20201009_isala_cross_1+run20201016_isala_cross_2+run20201023_isala_cross_3+run20201030_isala_cross_4+run20201106_isala_cross_5+run20201120_isala_cross_6+run20201204_isala_cross_8+run20201211_isala_cross_9+run20210119_isala_cross_7+Q0.Leeftijd+Q1.Q32.Born_vaginal
Born with vaginal birth	Bifidobacterium	-0.154466	0.163949	-0.942158	0.346187	0.662918	{True: 2714, False: 329}	t272 ~lib_size+read_conc_norm+run20201009_isala_cross_1+run20201016_isala_cross_2+run20201023_isala_cross_3+run20201030_isala_cross_4+run20201106_isala_cross_5+run20201120_isala_cross_6+run20201204_isala_cross_8+run20201211_isala_cross_9+run20210119_isala_cross_7+Q0.Leeftijd+Q1.Q32.Born_vaginal
Born with vaginal birth	Anaerococcus	-0.0942741	0.181824	-0.51849	0.604155	0.837412	{True: 2714, False: 329}	t123 ~lib_size+read_conc_norm+run20201009_isala_cross_1+run20201016_isala_cross_2+run20201023_isala_cross_3+run20201030_isala_cross_4+run20201106_isala_cross_5+run20201120_isala_cross_6+run20201204_isala_cross_8+run20201211_isala_cross_9+run20210119_isala_cross_7+Q0.Leeftijd+Q1.Q32.Born_vaginal
Born with vaginal birth	Finegoldia	-0.138381	0.15652	-0.884108	0.376708	0.690379	{True: 2714, False: 329}	t472 ~lib_size+read_conc_norm+run20201009_isala_cross_1+run20201016_isala_cross_2+run20201023_isala_cross_3+run20201030_isala_cross_4+run20201106_isala_cross_5+run20201120_isala_cross_6+run20201204_isala_cross_8+run20201211_isala_cross_9+run20210119_isala_cross_7+Q0.Leeftijd+Q1.Q32.Born_vaginal
Born with vaginal birth	Limosilactobacillus	0.260212	0.22241	1.16997	0.242106	0.55807	{True: 2714, False: 329}	t433 ~lib_size+read_conc_norm+run20201009_isala_cross_1+run20201016_isala_cross_2+run20201023_isala_cross_3+run20201030_isala_cross_4+run20201106_isala_cross_5+run20201120_isala_cross_6+run20201204_isala_cross_8+run20201211_isala_cross_9+run20210119_isala_cross_7+Q0.Leeftijd+Q1.Q32.Born_vaginal
Born with vaginal birth	Clostridium	0.203803	0.170722	1.19377	0.232661	0.548629	{True: 2714, False: 329}	t444 ~lib_size+read_conc_norm+run20201009_isala_cross_1+run20201016_isala_cross_2+run20201023_isala_cross_3+run20201030_isala_cross_4+run20201106_isala_cross_5+run20201120_isala_cross_6+run20201204_isala_cross_8+run20201211_isala_cross_9+run20210119_isala_cross_7+Q0.Leeftijd+Q1.Q32.Born_vaginal
Born with vaginal birth	Streptococcus	0.0606886	0.213396	0.284395	0.776127	0.920149	{True: 2714, False: 329}	t11 ~lib_size+read_conc_norm+run20201009_isala_cross_1+run20201016_isala_cross_2+run20201023_isala_cross_3+run20201030_isala_cross_4+run20201106_isala_cross_5+run20201120_isala_cross_6+run20201204_isala_cross_8+run20201211_isala_cross_9+run20210119_isala_cross_7+Q0.Leeftijd+Q1.Q32.Born_vaginal
Born with vaginal birth	eigen_AV	-0.310839	0.393892	-0.789147	0.430088	0.727924	{True: 2714, False: 329}	eigen_AV ~lib_size+read_conc_norm+run20201009_isala_cross_1+run20201016_isala_cross_2+run20201023_isala_cross_3+run20201030_isala_cross_4+run20201106_isala_cross_5+run20201120_isala_cross_6+run20201204_isala_cross_8+run20201211_isala_cross_9+run20210119_isala_cross_7+Q0.Leeftijd+Q1.Q32.Born_vaginal
Born with vaginal birth	eigen_BV	-0.016041	0.362304	-0.0442749	0.964688	0.989678	{True: 2714, False: 329}	eigen_BV ~lib_size+read_conc_norm+run20201009_isala_cross_1+run20201016_isala_cross_2+run20201023_isala_cross_3+run20201030_isala_cross_4+run20201106_isala_cross_5+run20201120_isala_cross_6+run20201204_isala_cross_8+run20201211_isala_cross_9+run20210119_isala_cross_7+Q0.Leeftijd+Q1.Q32.Born_vaginal
Born with vaginal birth	eigen_Gut	-0.206481	0.152011	-1.35833	0.17446	0.47355	{True: 2714, False: 329}	eigen_Gut ~lib_size+read_conc_norm+run20201009_isala_cross_1+run20201016_isala_cross_2+run20201023_isala_cross_3+run20201030_isala_cross_4+run20201106_isala_cross_5+run20201120_isala_cross_6+run20201204_isala_cross_8+run20201211_isala_cross_9+run20210119_isala_cross_7+Q0.Leeftijd+Q1.Q32.Born_vaginal
Born with vaginal birth	eigen_Lacto	0.331786	0.302553	1.09662	0.272895	0.595886	{True: 2714, False: 329}	eigen_Lacto ~lib_size+read_conc_norm+run20201009_isala_cross_1+run20201016_isala_cross_2+run20201023_isala_cross_3+run20201030_isala_cross_4+run20201106_isala_cross_5+run20201120_isala_cross_6+run20201204_isala_cross_8+run20201211_isala_cross_9+run20210119_isala_cross_7+Q0.Leeftijd+Q1.Q32.Born_vaginal
Born with caesarean section	Lactobacillus crispatus group	-0.139084	0.259373	-0.536232	0.591838	0.830763	{False: 2749, True: 294}	t34 ~lib_size+read_conc_norm+run20201009_isala_cross_1+run20201016_isala_cross_2+run20201023_isala_cross_3+run20201030_isala_cross_4+run20201106_isala_cross_5+run20201120_isala_cross_6+run20201204_isala_cross_8+run20201211_isala_cross_9+run20210119_isala_cross_7+Q0.Leeftijd+Q1.Q32.Born_csect
Born with caesarean section	Lactobacillus iners group	0.0189888	0.305511	0.0621542	0.950444	0.98545	{False: 2749, True: 294}	t22 ~lib_size+read_conc_norm+run20201009_isala_cross_1+run20201016_isala_cross_2+run20201023_isala_cross_3+run20201030_isala_cross_4+run20201106_isala_cross_5+run20201120_isala_cross_6+run20201204_isala_cross_8+run20201211_isala_cross_9+run20210119_isala_cross_7+Q0.Leeftijd+Q1.Q32.Born_csect
Born with caesarean section	Gardnerella	0.241992	0.289942	0.834623	0.403996	0.710409	{False: 2749, True: 294}	t251 ~lib_size+read_conc_norm+run20201009_isala_cross_1+run20201016_isala_cross_2+run20201023_isala_cross_3+run20201030_isala_cross_4+run20201106_isala_cross_5+run20201120_isala_cross_6+run20201204_isala_cross_8+run20201211_isala_cross_9+run20210119_isala_cross_7+Q0.Leeftijd+Q1.Q32.Born_csect
Born with caesarean section	Prevotella	-0.100321	0.199978	-0.50166	0.615943	0.839565	{False: 2749, True: 294}	t35 ~lib_size+read_conc_norm+run20201009_isala_cross_1+run20201016_isala_cross_2+run20201023_isala_cross_3+run20201030_isala_cross_4+run20201106_isala_cross_5+run20201120_isala_cross_6+run20201204_isala_cross_8+run20201211_isala_cross_9+run20210119_isala_cross_7+Q0.Leeftijd+Q1.Q32.Born_csect
Born with caesarean section	Lactobacillus jensenii group	0.0560106	0.287146	0.19506	0.845359	0.944129	{False: 2749, True: 294}	t223 ~lib_size+read_conc_norm+run20201009_isala_cross_1+run20201016_isala_cross_2+run20201023_isala_cross_3+run20201030_isala_cross_4+run20201106_isala_cross_5+run20201120_isala_cross_6+run20201204_isala_cross_8+run20201211_isala_cross_9+run20210119_isala_cross_7+Q0.Leeftijd+Q1.Q32.Born_csect
Born with caesarean section	Lactobacillus gasseri group	0.141893	0.238447	0.595071	0.55184	0.807531	{False: 2749, True: 294}	t495 ~lib_size+read_conc_norm+run20201009_isala_cross_1+run20201016_isala_cross_2+run20201023_isala_cross_3+run20201030_isala_cross_4+run20201106_isala_cross_5+run20201120_isala_cross_6+run20201204_isala_cross_8+run20201211_isala_cross_9+run20210119_isala_cross_7+Q0.Leeftijd+Q1.Q32.Born_csect
Born with caesarean section	Bifidobacterium	0.0472474	0.172608	0.273727	0.784313	0.923809	{False: 2749, True: 294}	t272 ~lib_size+read_conc_norm+run20201009_isala_cross_1+run20201016_isala_cross_2+run20201023_isala_cross_3+run20201030_isala_cross_4+run20201106_isala_cross_5+run20201120_isala_cross_6+run20201204_isala_cross_8+run20201211_isala_cross_9+run20210119_isala_cross_7+Q0.Leeftijd+Q1.Q32.Born_csect
Born with caesarean section	Anaerococcus	0.0566353	0.191408	0.295888	0.767336	0.91388	{False: 2749, True: 294}	t123 ~lib_size+read_conc_norm+run20201009_isala_cross_1+run20201016_isala_cross_2+run20201023_isala_cross_3+run20201030_isala_cross_4+run20201106_isala_cross_5+run20201120_isala_cross_6+run20201204_isala_cross_8+run20201211_isala_cross_9+run20210119_isala_cross_7+Q0.Leeftijd+Q1.Q32.Born_csect
Born with caesarean section	Finegoldia	0.0999401	0.164776	0.606519	0.544215	0.802085	{False: 2749, True: 294}	t472 ~lib_size+read_conc_norm+run20201009_isala_cross_1+run20201016_isala_cross_2+run20201023_isala_cross_3+run20201030_isala_cross_4+run20201106_isala_cross_5+run20201120_isala_cross_6+run20201204_isala_cross_8+run20201211_isala_cross_9+run20210119_isala_cross_7+Q0.Leeftijd+Q1.Q32.Born_csect
Born with caesarean section	Limosilactobacillus	-0.17465	0.234157	-0.745869	0.455804	0.746587	{False: 2749, True: 294}	t433 ~lib_size+read_conc_norm+run20201009_isala_cross_1+run20201016_isala_cross_2+run20201023_isala_cross_3+run20201030_isala_cross_4+run20201106_isala_cross_5+run20201120_isala_cross_6+run20201204_isala_cross_8+run20201211_isala_cross_9+run20210119_isala_cross_7+Q0.Leeftijd+Q1.Q32.Born_csect
Born with caesarean section	Clostridium	-0.192945	0.179723	-1.07357	0.283102	0.607168	{False: 2749, True: 294}	t444 ~lib_size+read_conc_norm+run20201009_isala_cross_1+run20201016_isala_cross_2+run20201023_isala_cross_3+run20201030_isala_cross_4+run20201106_isala_cross_5+run20201120_isala_cross_6+run20201204_isala_cross_8+run20201211_isala_cross_9+run20210119_isala_cross_7+Q0.Leeftijd+Q1.Q32.Born_csect
Born with caesarean section	Streptococcus	-0.0820572	0.224634	-0.365292	0.714919	0.889982	{False: 2749, True: 294}	t11 ~lib_size+read_conc_norm+run20201009_isala_cross_1+run20201016_isala_cross_2+run20201023_isala_cross_3+run20201030_isala_cross_4+run20201106_isala_cross_5+run20201120_isala_cross_6+run20201204_isala_cross_8+run20201211_isala_cross_9+run20210119_isala_cross_7+Q0.Leeftijd+Q1.Q32.Born_csect
Born with caesarean section	eigen_AV	0.0942619	0.41468	0.227312	0.820196	0.9368	{False: 2749, True: 294}	eigen_AV ~lib_size+read_conc_norm+run20201009_isala_cross_1+run20201016_isala_cross_2+run20201023_isala_cross_3+run20201030_isala_cross_4+run20201106_isala_cross_5+run20201120_isala_cross_6+run20201204_isala_cross_8+run20201211_isala_cross_9+run20210119_isala_cross_7+Q0.Leeftijd+Q1.Q32.Born_csect
Born with caesarean section	eigen_BV	-0.0140648	0.381388	-0.036878	0.970585	0.991403	{False: 2749, True: 294}	eigen_BV ~lib_size+read_conc_norm+run20201009_isala_cross_1+run20201016_isala_cross_2+run20201023_isala_cross_3+run20201030_isala_cross_4+run20201106_isala_cross_5+run20201120_isala_cross_6+run20201204_isala_cross_8+run20201211_isala_cross_9+run20210119_isala_cross_7+Q0.Leeftijd+Q1.Q32.Born_csect
Born with caesarean section	eigen_Gut	0.277665	0.159987	1.73554	0.0827464	0.318927	{False: 2749, True: 294}	eigen_Gut ~lib_size+read_conc_norm+run20201009_isala_cross_1+run20201016_isala_cross_2+run20201023_isala_cross_3+run20201030_isala_cross_4+run20201106_isala_cross_5+run20201120_isala_cross_6+run20201204_isala_cross_8+run20201211_isala_cross_9+run20210119_isala_cross_7+Q0.Leeftijd+Q1.Q32.Born_csect
Born with caesarean section	eigen_Lacto	-0.117962	0.318547	-0.370315	0.711174	0.886884	{False: 2749, True: 294}	eigen_Lacto ~lib_size+read_conc_norm+run20201009_isala_cross_1+run20201016_isala_cross_2+run20201023_isala_cross_3+run20201030_isala_cross_4+run20201106_isala_cross_5+run20201120_isala_cross_6+run20201204_isala_cross_8+run20201211_isala_cross_9+run20210119_isala_cross_7+Q0.Leeftijd+Q1.Q32.Born_csect
Frequency of probiotic dairy	Lactobacillus crispatus group	-0.0793789	0.07619	-1.04185	0.297562	0.621529	3043	t34 ~lib_size+read_conc_norm+run20201009_isala_cross_1+run20201016_isala_cross_2+run20201023_isala_cross_3+run20201030_isala_cross_4+run20201106_isala_cross_5+run20201120_isala_cross_6+run20201204_isala_cross_8+run20201211_isala_cross_9+run20210119_isala_cross_7+Q0.Leeftijd+Q1.Q28_1.Freq_Dairy_Probio
Frequency of probiotic dairy	Lactobacillus iners group	0.0234154	0.0897537	0.260885	0.794199	0.927169	3043	t22 ~lib_size+read_conc_norm+run20201009_isala_cross_1+run20201016_isala_cross_2+run20201023_isala_cross_3+run20201030_isala_cross_4+run20201106_isala_cross_5+run20201120_isala_cross_6+run20201204_isala_cross_8+run20201211_isala_cross_9+run20210119_isala_cross_7+Q0.Leeftijd+Q1.Q28_1.Freq_Dairy_Probio
Frequency of probiotic dairy	Gardnerella	-0.0561885	0.0851843	-0.659612	0.509553	0.782363	3043	t251 ~lib_size+read_conc_norm+run20201009_isala_cross_1+run20201016_isala_cross_2+run20201023_isala_cross_3+run20201030_isala_cross_4+run20201106_isala_cross_5+run20201120_isala_cross_6+run20201204_isala_cross_8+run20201211_isala_cross_9+run20210119_isala_cross_7+Q0.Leeftijd+Q1.Q28_1.Freq_Dairy_Probio
Frequency of probiotic dairy	Prevotella	0.0496757	0.058746	0.845601	0.397842	0.704983	3043	t35 ~lib_size+read_conc_norm+run20201009_isala_cross_1+run20201016_isala_cross_2+run20201023_isala_cross_3+run20201030_isala_cross_4+run20201106_isala_cross_5+run20201120_isala_cross_6+run20201204_isala_cross_8+run20201211_isala_cross_9+run20210119_isala_cross_7+Q0.Leeftijd+Q1.Q28_1.Freq_Dairy_Probio
Frequency of probiotic dairy	Lactobacillus jensenii group	-0.0571791	0.0843534	-0.677852	0.497917	0.77458	3043	t223 ~lib_size+read_conc_norm+run20201009_isala_cross_1+run20201016_isala_cross_2+run20201023_isala_cross_3+run20201030_isala_cross_4+run20201106_isala_cross_5+run20201120_isala_cross_6+run20201204_isala_cross_8+run20201211_isala_cross_9+run20210119_isala_cross_7+Q0.Leeftijd+Q1.Q28_1.Freq_Dairy_Probio
Frequency of probiotic dairy	Lactobacillus gasseri group	0.039871	0.0700525	0.569158	0.569291	0.816369	3043	t495 ~lib_size+read_conc_norm+run20201009_isala_cross_1+run20201016_isala_cross_2+run20201023_isala_cross_3+run20201030_isala_cross_4+run20201106_isala_cross_5+run20201120_isala_cross_6+run20201204_isala_cross_8+run20201211_isala_cross_9+run20210119_isala_cross_7+Q0.Leeftijd+Q1.Q28_1.Freq_Dairy_Probio
Frequency of probiotic dairy	Bifidobacterium	0.0817838	0.0506885	1.61346	0.106749	0.365741	3043	t272 ~lib_size+read_conc_norm+run20201009_isala_cross_1+run20201016_isala_cross_2+run20201023_isala_cross_3+run20201030_isala_cross_4+run20201106_isala_cross_5+run20201120_isala_cross_6+run20201204_isala_cross_8+run20201211_isala_cross_9+run20210119_isala_cross_7+Q0.Leeftijd+Q1.Q28_1.Freq_Dairy_Probio
Frequency of probiotic dairy	Anaerococcus	0.0314895	0.0562307	0.560006	0.575517	0.820234	3043	t123 ~lib_size+read_conc_norm+run20201009_isala_cross_1+run20201016_isala_cross_2+run20201023_isala_cross_3+run20201030_isala_cross_4+run20201106_isala_cross_5+run20201120_isala_cross_6+run20201204_isala_cross_8+run20201211_isala_cross_9+run20210119_isala_cross_7+Q0.Leeftijd+Q1.Q28_1.Freq_Dairy_Probio
Frequency of probiotic dairy	Finegoldia	0.00459993	0.0484118	0.0950168	0.924308	0.97646	3043	t472 ~lib_size+read_conc_norm+run20201009_isala_cross_1+run20201016_isala_cross_2+run20201023_isala_cross_3+run20201030_isala_cross_4+run20201106_isala_cross_5+run20201120_isala_cross_6+run20201204_isala_cross_8+run20201211_isala_cross_9+run20210119_isala_cross_7+Q0.Leeftijd+Q1.Q28_1.Freq_Dairy_Probio
Frequency of probiotic dairy	Limosilactobacillus	-0.0325686	0.0687956	-0.473411	0.635954	0.848782	3043	t433 ~lib_size+read_conc_norm+run20201009_isala_cross_1+run20201016_isala_cross_2+run20201023_isala_cross_3+run20201030_isala_cross_4+run20201106_isala_cross_5+run20201120_isala_cross_6+run20201204_isala_cross_8+run20201211_isala_cross_9+run20210119_isala_cross_7+Q0.Leeftijd+Q1.Q28_1.Freq_Dairy_Probio
Frequency of probiotic dairy	Clostridium	-0.0353847	0.0528061	-0.670087	0.502853	0.77805	3043	t444 ~lib_size+read_conc_norm+run20201009_isala_cross_1+run20201016_isala_cross_2+run20201023_isala_cross_3+run20201030_isala_cross_4+run20201106_isala_cross_5+run20201120_isala_cross_6+run20201204_isala_cross_8+run20201211_isala_cross_9+run20210119_isala_cross_7+Q0.Leeftijd+Q1.Q28_1.Freq_Dairy_Probio
Frequency of probiotic dairy	Streptococcus	0.0412987	0.0659915	0.625818	0.531481	0.794578	3043	t11 ~lib_size+read_conc_norm+run20201009_isala_cross_1+run20201016_isala_cross_2+run20201023_isala_cross_3+run20201030_isala_cross_4+run20201106_isala_cross_5+run20201120_isala_cross_6+run20201204_isala_cross_8+run20201211_isala_cross_9+run20210119_isala_cross_7+Q0.Leeftijd+Q1.Q28_1.Freq_Dairy_Probio
Frequency of probiotic dairy	eigen_AV	0.104793	0.121813	0.860276	0.389705	0.699028	3043	eigen_AV ~lib_size+read_conc_norm+run20201009_isala_cross_1+run20201016_isala_cross_2+run20201023_isala_cross_3+run20201030_isala_cross_4+run20201106_isala_cross_5+run20201120_isala_cross_6+run20201204_isala_cross_8+run20201211_isala_cross_9+run20210119_isala_cross_7+Q0.Leeftijd+Q1.Q28_1.Freq_Dairy_Probio
Frequency of probiotic dairy	eigen_BV	-0.014568	0.112046	-0.130018	0.896561	0.966017	3043	eigen_BV ~lib_size+read_conc_norm+run20201009_isala_cross_1+run20201016_isala_cross_2+run20201023_isala_cross_3+run20201030_isala_cross_4+run20201106_isala_cross_5+run20201120_isala_cross_6+run20201204_isala_cross_8+run20201211_isala_cross_9+run20210119_isala_cross_7+Q0.Leeftijd+Q1.Q28_1.Freq_Dairy_Probio
Frequency of probiotic dairy	eigen_Gut	0.051619	0.0470159	1.09791	0.272333	0.595305	3043	eigen_Gut ~lib_size+read_conc_norm+run20201009_isala_cross_1+run20201016_isala_cross_2+run20201023_isala_cross_3+run20201030_isala_cross_4+run20201106_isala_cross_5+run20201120_isala_cross_6+run20201204_isala_cross_8+run20201211_isala_cross_9+run20210119_isala_cross_7+Q0.Leeftijd+Q1.Q28_1.Freq_Dairy_Probio
Frequency of probiotic dairy	eigen_Lacto	-0.0961693	0.0935701	-1.02778	0.304136	0.628091	3043	eigen_Lacto ~lib_size+read_conc_norm+run20201009_isala_cross_1+run20201016_isala_cross_2+run20201023_isala_cross_3+run20201030_isala_cross_4+run20201106_isala_cross_5+run20201120_isala_cross_6+run20201204_isala_cross_8+run20201211_isala_cross_9+run20210119_isala_cross_7+Q0.Leeftijd+Q1.Q28_1.Freq_Dairy_Probio
Frequency of probiotic yoghurt	Lactobacillus crispatus group	0.145716	0.0760976	1.91486	0.0556044	0.258939	3043	t34 ~lib_size+read_conc_norm+run20201009_isala_cross_1+run20201016_isala_cross_2+run20201023_isala_cross_3+run20201030_isala_cross_4+run20201106_isala_cross_5+run20201120_isala_cross_6+run20201204_isala_cross_8+run20201211_isala_cross_9+run20210119_isala_cross_7+Q0.Leeftijd+Q1.Q28_2.Freq_Yoghurt_Probio
Frequency of probiotic yoghurt	Lactobacillus iners group	0.0303593	0.0896824	0.338521	0.734994	0.897396	3043	t22 ~lib_size+read_conc_norm+run20201009_isala_cross_1+run20201016_isala_cross_2+run20201023_isala_cross_3+run20201030_isala_cross_4+run20201106_isala_cross_5+run20201120_isala_cross_6+run20201204_isala_cross_8+run20201211_isala_cross_9+run20210119_isala_cross_7+Q0.Leeftijd+Q1.Q28_2.Freq_Yoghurt_Probio
Frequency of probiotic yoghurt	Gardnerella	-0.113026	0.0850986	-1.32817	0.184221	0.487291	3043	t251 ~lib_size+read_conc_norm+run20201009_isala_cross_1+run20201016_isala_cross_2+run20201023_isala_cross_3+run20201030_isala_cross_4+run20201106_isala_cross_5+run20201120_isala_cross_6+run20201204_isala_cross_8+run20201211_isala_cross_9+run20210119_isala_cross_7+Q0.Leeftijd+Q1.Q28_2.Freq_Yoghurt_Probio
Frequency of probiotic yoghurt	Prevotella	0.0918251	0.058683	1.56477	0.117742	0.3844	3043	t35 ~lib_size+read_conc_norm+run20201009_isala_cross_1+run20201016_isala_cross_2+run20201023_isala_cross_3+run20201030_isala_cross_4+run20201106_isala_cross_5+run20201120_isala_cross_6+run20201204_isala_cross_8+run20201211_isala_cross_9+run20210119_isala_cross_7+Q0.Leeftijd+Q1.Q28_2.Freq_Yoghurt_Probio
Frequency of probiotic yoghurt	Lactobacillus jensenii group	-0.0577614	0.0842868	-0.685296	0.49321	0.771283	3043	t223 ~lib_size+read_conc_norm+run20201009_isala_cross_1+run20201016_isala_cross_2+run20201023_isala_cross_3+run20201030_isala_cross_4+run20201106_isala_cross_5+run20201120_isala_cross_6+run20201204_isala_cross_8+run20201211_isala_cross_9+run20210119_isala_cross_7+Q0.Leeftijd+Q1.Q28_2.Freq_Yoghurt_Probio
Frequency of probiotic yoghurt	Lactobacillus gasseri group	-0.00638449	0.070001	-0.0912057	0.927335	0.977349	3043	t495 ~lib_size+read_conc_norm+run20201009_isala_cross_1+run20201016_isala_cross_2+run20201023_isala_cross_3+run20201030_isala_cross_4+run20201106_isala_cross_5+run20201120_isala_cross_6+run20201204_isala_cross_8+run20201211_isala_cross_9+run20210119_isala_cross_7+Q0.Leeftijd+Q1.Q28_2.Freq_Yoghurt_Probio
Frequency of probiotic yoghurt	Bifidobacterium	-0.0825451	0.0506481	-1.62978	0.103253	0.359629	3043	t272 ~lib_size+read_conc_norm+run20201009_isala_cross_1+run20201016_isala_cross_2+run20201023_isala_cross_3+run20201030_isala_cross_4+run20201106_isala_cross_5+run20201120_isala_cross_6+run20201204_isala_cross_8+run20201211_isala_cross_9+run20210119_isala_cross_7+Q0.Leeftijd+Q1.Q28_2.Freq_Yoghurt_Probio
Frequency of probiotic yoghurt	Anaerococcus	0.035577	0.0561856	0.633205	0.526648	0.792926	3043	t123 ~lib_size+read_conc_norm+run20201009_isala_cross_1+run20201016_isala_cross_2+run20201023_isala_cross_3+run20201030_isala_cross_4+run20201106_isala_cross_5+run20201120_isala_cross_6+run20201204_isala_cross_8+run20201211_isala_cross_9+run20210119_isala_cross_7+Q0.Leeftijd+Q1.Q28_2.Freq_Yoghurt_Probio
Frequency of probiotic yoghurt	Finegoldia	0.0475681	0.048366	0.983502	0.325439	0.644583	3043	t472 ~lib_size+read_conc_norm+run20201009_isala_cross_1+run20201016_isala_cross_2+run20201023_isala_cross_3+run20201030_isala_cross_4+run20201106_isala_cross_5+run20201120_isala_cross_6+run20201204_isala_cross_8+run20201211_isala_cross_9+run20210119_isala_cross_7+Q0.Leeftijd+Q1.Q28_2.Freq_Yoghurt_Probio
Frequency of probiotic yoghurt	Limosilactobacillus	0.053371	0.0687371	0.776451	0.437543	0.731501	3043	t433 ~lib_size+read_conc_norm+run20201009_isala_cross_1+run20201016_isala_cross_2+run20201023_isala_cross_3+run20201030_isala_cross_4+run20201106_isala_cross_5+run20201120_isala_cross_6+run20201204_isala_cross_8+run20201211_isala_cross_9+run20210119_isala_cross_7+Q0.Leeftijd+Q1.Q28_2.Freq_Yoghurt_Probio
Frequency of probiotic yoghurt	Clostridium	-0.110458	0.0527303	-2.09476	0.0362748	0.200515	3043	t444 ~lib_size+read_conc_norm+run20201009_isala_cross_1+run20201016_isala_cross_2+run20201023_isala_cross_3+run20201030_isala_cross_4+run20201106_isala_cross_5+run20201120_isala_cross_6+run20201204_isala_cross_8+run20201211_isala_cross_9+run20210119_isala_cross_7+Q0.Leeftijd+Q1.Q28_2.Freq_Yoghurt_Probio
Frequency of probiotic yoghurt	Streptococcus	0.0658927	0.0659329	0.99939	0.317686	0.639656	3043	t11 ~lib_size+read_conc_norm+run20201009_isala_cross_1+run20201016_isala_cross_2+run20201023_isala_cross_3+run20201030_isala_cross_4+run20201106_isala_cross_5+run20201120_isala_cross_6+run20201204_isala_cross_8+run20201211_isala_cross_9+run20210119_isala_cross_7+Q0.Leeftijd+Q1.Q28_2.Freq_Yoghurt_Probio
Frequency of probiotic yoghurt	eigen_AV	0.103966	0.121717	0.854157	0.393085	0.701406	3043	eigen_AV ~lib_size+read_conc_norm+run20201009_isala_cross_1+run20201016_isala_cross_2+run20201023_isala_cross_3+run20201030_isala_cross_4+run20201106_isala_cross_5+run20201120_isala_cross_6+run20201204_isala_cross_8+run20201211_isala_cross_9+run20210119_isala_cross_7+Q0.Leeftijd+Q1.Q28_2.Freq_Yoghurt_Probio
Frequency of probiotic yoghurt	eigen_BV	-0.149445	0.111925	-1.33522	0.181905	0.485243	3043	eigen_BV ~lib_size+read_conc_norm+run20201009_isala_cross_1+run20201016_isala_cross_2+run20201023_isala_cross_3+run20201030_isala_cross_4+run20201106_isala_cross_5+run20201120_isala_cross_6+run20201204_isala_cross_8+run20201211_isala_cross_9+run20210119_isala_cross_7+Q0.Leeftijd+Q1.Q28_2.Freq_Yoghurt_Probio
Frequency of probiotic yoghurt	eigen_Gut	-0.0161864	0.0469873	-0.344485	0.730506	0.896525	3043	eigen_Gut ~lib_size+read_conc_norm+run20201009_isala_cross_1+run20201016_isala_cross_2+run20201023_isala_cross_3+run20201030_isala_cross_4+run20201106_isala_cross_5+run20201120_isala_cross_6+run20201204_isala_cross_8+run20201211_isala_cross_9+run20210119_isala_cross_7+Q0.Leeftijd+Q1.Q28_2.Freq_Yoghurt_Probio
Frequency of probiotic yoghurt	eigen_Lacto	0.0585173	0.0935067	0.625809	0.531488	0.794578	3043	eigen_Lacto ~lib_size+read_conc_norm+run20201009_isala_cross_1+run20201016_isala_cross_2+run20201023_isala_cross_3+run20201030_isala_cross_4+run20201106_isala_cross_5+run20201120_isala_cross_6+run20201204_isala_cross_8+run20201211_isala_cross_9+run20210119_isala_cross_7+Q0.Leeftijd+Q1.Q28_2.Freq_Yoghurt_Probio
Frequency of probiotic capsules	Lactobacillus crispatus group	0.0817713	0.0762448	1.07248	0.283588	0.607996	3043	t34 ~lib_size+read_conc_norm+run20201009_isala_cross_1+run20201016_isala_cross_2+run20201023_isala_cross_3+run20201030_isala_cross_4+run20201106_isala_cross_5+run20201120_isala_cross_6+run20201204_isala_cross_8+run20201211_isala_cross_9+run20210119_isala_cross_7+Q0.Leeftijd+Q1.Q28_3.Freq_Capsules_Probio
Frequency of probiotic capsules	Lactobacillus iners group	0.122577	0.0897926	1.36511	0.17232	0.470188	3043	t22 ~lib_size+read_conc_norm+run20201009_isala_cross_1+run20201016_isala_cross_2+run20201023_isala_cross_3+run20201030_isala_cross_4+run20201106_isala_cross_5+run20201120_isala_cross_6+run20201204_isala_cross_8+run20201211_isala_cross_9+run20210119_isala_cross_7+Q0.Leeftijd+Q1.Q28_3.Freq_Capsules_Probio
Frequency of probiotic capsules	Gardnerella	0.0565105	0.0852464	0.662908	0.50744	0.781822	3043	t251 ~lib_size+read_conc_norm+run20201009_isala_cross_1+run20201016_isala_cross_2+run20201023_isala_cross_3+run20201030_isala_cross_4+run20201106_isala_cross_5+run20201120_isala_cross_6+run20201204_isala_cross_8+run20201211_isala_cross_9+run20210119_isala_cross_7+Q0.Leeftijd+Q1.Q28_3.Freq_Capsules_Probio
Frequency of probiotic capsules	Prevotella	0.0200539	0.0587947	0.341084	0.733064	0.896821	3043	t35 ~lib_size+read_conc_norm+run20201009_isala_cross_1+run20201016_isala_cross_2+run20201023_isala_cross_3+run20201030_isala_cross_4+run20201106_isala_cross_5+run20201120_isala_cross_6+run20201204_isala_cross_8+run20201211_isala_cross_9+run20210119_isala_cross_7+Q0.Leeftijd+Q1.Q28_3.Freq_Capsules_Probio
Frequency of probiotic capsules	Lactobacillus jensenii group	0.0600796	0.0844142	0.711724	0.476691	0.759796	3043	t223 ~lib_size+read_conc_norm+run20201009_isala_cross_1+run20201016_isala_cross_2+run20201023_isala_cross_3+run20201030_isala_cross_4+run20201106_isala_cross_5+run20201120_isala_cross_6+run20201204_isala_cross_8+run20201211_isala_cross_9+run20210119_isala_cross_7+Q0.Leeftijd+Q1.Q28_3.Freq_Capsules_Probio
Frequency of probiotic capsules	Lactobacillus gasseri group	0.018322	0.0701066	0.261345	0.793844	0.927169	3043	t495 ~lib_size+read_conc_norm+run20201009_isala_cross_1+run20201016_isala_cross_2+run20201023_isala_cross_3+run20201030_isala_cross_4+run20201106_isala_cross_5+run20201120_isala_cross_6+run20201204_isala_cross_8+run20201211_isala_cross_9+run20210119_isala_cross_7+Q0.Leeftijd+Q1.Q28_3.Freq_Capsules_Probio
Frequency of probiotic capsules	Bifidobacterium	0.0280973	0.0507447	0.553699	0.579826	0.823354	3043	t272 ~lib_size+read_conc_norm+run20201009_isala_cross_1+run20201016_isala_cross_2+run20201023_isala_cross_3+run20201030_isala_cross_4+run20201106_isala_cross_5+run20201120_isala_cross_6+run20201204_isala_cross_8+run20201211_isala_cross_9+run20210119_isala_cross_7+Q0.Leeftijd+Q1.Q28_3.Freq_Capsules_Probio
Frequency of probiotic capsules	Anaerococcus	-0.0357092	0.0562709	-0.634594	0.525741	0.792926	3043	t123 ~lib_size+read_conc_norm+run20201009_isala_cross_1+run20201016_isala_cross_2+run20201023_isala_cross_3+run20201030_isala_cross_4+run20201106_isala_cross_5+run20201120_isala_cross_6+run20201204_isala_cross_8+run20201211_isala_cross_9+run20210119_isala_cross_7+Q0.Leeftijd+Q1.Q28_3.Freq_Capsules_Probio
Frequency of probiotic capsules	Finegoldia	-0.0281324	0.0484445	-0.580714	0.561477	0.812984	3043	t472 ~lib_size+read_conc_norm+run20201009_isala_cross_1+run20201016_isala_cross_2+run20201023_isala_cross_3+run20201030_isala_cross_4+run20201106_isala_cross_5+run20201120_isala_cross_6+run20201204_isala_cross_8+run20201211_isala_cross_9+run20210119_isala_cross_7+Q0.Leeftijd+Q1.Q28_3.Freq_Capsules_Probio
Frequency of probiotic capsules	Limosilactobacillus	0.035574	0.0688453	0.516724	0.605387	0.837412	3043	t433 ~lib_size+read_conc_norm+run20201009_isala_cross_1+run20201016_isala_cross_2+run20201023_isala_cross_3+run20201030_isala_cross_4+run20201106_isala_cross_5+run20201120_isala_cross_6+run20201204_isala_cross_8+run20201211_isala_cross_9+run20210119_isala_cross_7+Q0.Leeftijd+Q1.Q28_3.Freq_Capsules_Probio
Frequency of probiotic capsules	Clostridium	-0.0460661	0.0528419	-0.871772	0.383402	0.69589	3043	t444 ~lib_size+read_conc_norm+run20201009_isala_cross_1+run20201016_isala_cross_2+run20201023_isala_cross_3+run20201030_isala_cross_4+run20201106_isala_cross_5+run20201120_isala_cross_6+run20201204_isala_cross_8+run20201211_isala_cross_9+run20210119_isala_cross_7+Q0.Leeftijd+Q1.Q28_3.Freq_Capsules_Probio
Frequency of probiotic capsules	Streptococcus	0.0412584	0.0660396	0.624753	0.53218	0.794578	3043	t11 ~lib_size+read_conc_norm+run20201009_isala_cross_1+run20201016_isala_cross_2+run20201023_isala_cross_3+run20201030_isala_cross_4+run20201106_isala_cross_5+run20201120_isala_cross_6+run20201204_isala_cross_8+run20201211_isala_cross_9+run20210119_isala_cross_7+Q0.Leeftijd+Q1.Q28_3.Freq_Capsules_Probio
Frequency of probiotic capsules	eigen_AV	-0.142846	0.121889	-1.17194	0.241315	0.557524	3043	eigen_AV ~lib_size+read_conc_norm+run20201009_isala_cross_1+run20201016_isala_cross_2+run20201023_isala_cross_3+run20201030_isala_cross_4+run20201106_isala_cross_5+run20201120_isala_cross_6+run20201204_isala_cross_8+run20201211_isala_cross_9+run20210119_isala_cross_7+Q0.Leeftijd+Q1.Q28_3.Freq_Capsules_Probio
Frequency of probiotic capsules	eigen_BV	-0.00599167	0.112128	-0.053436	0.957388	0.98753	3043	eigen_BV ~lib_size+read_conc_norm+run20201009_isala_cross_1+run20201016_isala_cross_2+run20201023_isala_cross_3+run20201030_isala_cross_4+run20201106_isala_cross_5+run20201120_isala_cross_6+run20201204_isala_cross_8+run20201211_isala_cross_9+run20210119_isala_cross_7+Q0.Leeftijd+Q1.Q28_3.Freq_Capsules_Probio
Frequency of probiotic capsules	eigen_Gut	-0.016083	0.0470587	-0.341765	0.732551	0.896821	3043	eigen_Gut ~lib_size+read_conc_norm+run20201009_isala_cross_1+run20201016_isala_cross_2+run20201023_isala_cross_3+run20201030_isala_cross_4+run20201106_isala_cross_5+run20201120_isala_cross_6+run20201204_isala_cross_8+run20201211_isala_cross_9+run20210119_isala_cross_7+Q0.Leeftijd+Q1.Q28_3.Freq_Capsules_Probio
Frequency of probiotic capsules	eigen_Lacto	0.100924	0.0936367	1.07783	0.281197	0.605405	3043	eigen_Lacto ~lib_size+read_conc_norm+run20201009_isala_cross_1+run20201016_isala_cross_2+run20201023_isala_cross_3+run20201030_isala_cross_4+run20201106_isala_cross_5+run20201120_isala_cross_6+run20201204_isala_cross_8+run20201211_isala_cross_9+run20210119_isala_cross_7+Q0.Leeftijd+Q1.Q28_3.Freq_Capsules_Probio
Frequency dairy	Lactobacillus crispatus group	0.0315782	0.0762455	0.414164	0.678783	0.873283	3043	t34 ~lib_size+read_conc_norm+run20201009_isala_cross_1+run20201016_isala_cross_2+run20201023_isala_cross_3+run20201030_isala_cross_4+run20201106_isala_cross_5+run20201120_isala_cross_6+run20201204_isala_cross_8+run20201211_isala_cross_9+run20210119_isala_cross_7+Q0.Leeftijd+Q1.Q29_1.Freq_Dairy
Frequency dairy	Lactobacillus iners group	-0.108077	0.0897851	-1.20373	0.228789	0.544195	3043	t22 ~lib_size+read_conc_norm+run20201009_isala_cross_1+run20201016_isala_cross_2+run20201023_isala_cross_3+run20201030_isala_cross_4+run20201106_isala_cross_5+run20201120_isala_cross_6+run20201204_isala_cross_8+run20201211_isala_cross_9+run20210119_isala_cross_7+Q0.Leeftijd+Q1.Q29_1.Freq_Dairy
Frequency dairy	Gardnerella	0.00877116	0.0852395	0.1029	0.918049	0.975442	3043	t251 ~lib_size+read_conc_norm+run20201009_isala_cross_1+run20201016_isala_cross_2+run20201023_isala_cross_3+run20201030_isala_cross_4+run20201106_isala_cross_5+run20201120_isala_cross_6+run20201204_isala_cross_8+run20201211_isala_cross_9+run20210119_isala_cross_7+Q0.Leeftijd+Q1.Q29_1.Freq_Dairy
Frequency dairy	Prevotella	0.12517	0.0587429	2.13082	0.0331844	0.18944	3043	t35 ~lib_size+read_conc_norm+run20201009_isala_cross_1+run20201016_isala_cross_2+run20201023_isala_cross_3+run20201030_isala_cross_4+run20201106_isala_cross_5+run20201120_isala_cross_6+run20201204_isala_cross_8+run20201211_isala_cross_9+run20210119_isala_cross_7+Q0.Leeftijd+Q1.Q29_1.Freq_Dairy
Frequency dairy	Lactobacillus jensenii group	-0.0467606	0.0844042	-0.554008	0.579614	0.823202	3043	t223 ~lib_size+read_conc_norm+run20201009_isala_cross_1+run20201016_isala_cross_2+run20201023_isala_cross_3+run20201030_isala_cross_4+run20201106_isala_cross_5+run20201120_isala_cross_6+run20201204_isala_cross_8+run20201211_isala_cross_9+run20210119_isala_cross_7+Q0.Leeftijd+Q1.Q29_1.Freq_Dairy
Frequency dairy	Lactobacillus gasseri group	-0.0332289	0.0700942	-0.474061	0.635491	0.848782	3043	t495 ~lib_size+read_conc_norm+run20201009_isala_cross_1+run20201016_isala_cross_2+run20201023_isala_cross_3+run20201030_isala_cross_4+run20201106_isala_cross_5+run20201120_isala_cross_6+run20201204_isala_cross_8+run20201211_isala_cross_9+run20210119_isala_cross_7+Q0.Leeftijd+Q1.Q29_1.Freq_Dairy
Frequency dairy	Bifidobacterium	0.0159866	0.0507387	0.315076	0.752725	0.907049	3043	t272 ~lib_size+read_conc_norm+run20201009_isala_cross_1+run20201016_isala_cross_2+run20201023_isala_cross_3+run20201030_isala_cross_4+run20201106_isala_cross_5+run20201120_isala_cross_6+run20201204_isala_cross_8+run20201211_isala_cross_9+run20210119_isala_cross_7+Q0.Leeftijd+Q1.Q29_1.Freq_Dairy
Frequency dairy	Anaerococcus	0.0839167	0.0562455	1.49197	0.13581	0.418418	3043	t123 ~lib_size+read_conc_norm+run20201009_isala_cross_1+run20201016_isala_cross_2+run20201023_isala_cross_3+run20201030_isala_cross_4+run20201106_isala_cross_5+run20201120_isala_cross_6+run20201204_isala_cross_8+run20201211_isala_cross_9+run20210119_isala_cross_7+Q0.Leeftijd+Q1.Q29_1.Freq_Dairy
Frequency dairy	Finegoldia	0.12706	0.0483848	2.62604	0.00868198	0.07885	3043	t472 ~lib_size+read_conc_norm+run20201009_isala_cross_1+run20201016_isala_cross_2+run20201023_isala_cross_3+run20201030_isala_cross_4+run20201106_isala_cross_5+run20201120_isala_cross_6+run20201204_isala_cross_8+run20201211_isala_cross_9+run20210119_isala_cross_7+Q0.Leeftijd+Q1.Q29_1.Freq_Dairy
Frequency dairy	Limosilactobacillus	-0.160128	0.0687764	-2.32823	0.0199652	0.139077	3043	t433 ~lib_size+read_conc_norm+run20201009_isala_cross_1+run20201016_isala_cross_2+run20201023_isala_cross_3+run20201030_isala_cross_4+run20201106_isala_cross_5+run20201120_isala_cross_6+run20201204_isala_cross_8+run20201211_isala_cross_9+run20210119_isala_cross_7+Q0.Leeftijd+Q1.Q29_1.Freq_Dairy
Frequency dairy	Clostridium	-0.105144	0.052806	-1.99114	0.0465552	0.23326	3043	t444 ~lib_size+read_conc_norm+run20201009_isala_cross_1+run20201016_isala_cross_2+run20201023_isala_cross_3+run20201030_isala_cross_4+run20201106_isala_cross_5+run20201120_isala_cross_6+run20201204_isala_cross_8+run20201211_isala_cross_9+run20210119_isala_cross_7+Q0.Leeftijd+Q1.Q29_1.Freq_Dairy
Frequency dairy	Streptococcus	0.0198435	0.0660329	0.30051	0.763809	0.911552	3043	t11 ~lib_size+read_conc_norm+run20201009_isala_cross_1+run20201016_isala_cross_2+run20201023_isala_cross_3+run20201030_isala_cross_4+run20201106_isala_cross_5+run20201120_isala_cross_6+run20201204_isala_cross_8+run20201211_isala_cross_9+run20210119_isala_cross_7+Q0.Leeftijd+Q1.Q29_1.Freq_Dairy
Frequency dairy	eigen_AV	0.343586	0.121738	2.82233	0.00479871	0.0538634	3043	eigen_AV ~lib_size+read_conc_norm+run20201009_isala_cross_1+run20201016_isala_cross_2+run20201023_isala_cross_3+run20201030_isala_cross_4+run20201106_isala_cross_5+run20201120_isala_cross_6+run20201204_isala_cross_8+run20201211_isala_cross_9+run20210119_isala_cross_7+Q0.Leeftijd+Q1.Q29_1.Freq_Dairy
Frequency dairy	eigen_BV	0.00801945	0.112111	0.0715315	0.94298	0.983185	3043	eigen_BV ~lib_size+read_conc_norm+run20201009_isala_cross_1+run20201016_isala_cross_2+run20201023_isala_cross_3+run20201030_isala_cross_4+run20201106_isala_cross_5+run20201120_isala_cross_6+run20201204_isala_cross_8+run20201211_isala_cross_9+run20210119_isala_cross_7+Q0.Leeftijd+Q1.Q29_1.Freq_Dairy
Frequency dairy	eigen_Gut	0.00339026	0.0470524	0.0720528	0.942565	0.983033	3043	eigen_Gut ~lib_size+read_conc_norm+run20201009_isala_cross_1+run20201016_isala_cross_2+run20201023_isala_cross_3+run20201030_isala_cross_4+run20201106_isala_cross_5+run20201120_isala_cross_6+run20201204_isala_cross_8+run20201211_isala_cross_9+run20210119_isala_cross_7+Q0.Leeftijd+Q1.Q29_1.Freq_Dairy
Frequency dairy	eigen_Lacto	-0.0985292	0.0936234	-1.0524	0.2927	0.617353	3043	eigen_Lacto ~lib_size+read_conc_norm+run20201009_isala_cross_1+run20201016_isala_cross_2+run20201023_isala_cross_3+run20201030_isala_cross_4+run20201106_isala_cross_5+run20201120_isala_cross_6+run20201204_isala_cross_8+run20201211_isala_cross_9+run20210119_isala_cross_7+Q0.Leeftijd+Q1.Q29_1.Freq_Dairy
Frequency of fermented food	Lactobacillus crispatus group	0.0691634	0.0762631	0.906905	0.364529	0.679259	3043	t34 ~lib_size+read_conc_norm+run20201009_isala_cross_1+run20201016_isala_cross_2+run20201023_isala_cross_3+run20201030_isala_cross_4+run20201106_isala_cross_5+run20201120_isala_cross_6+run20201204_isala_cross_8+run20201211_isala_cross_9+run20210119_isala_cross_7+Q0.Leeftijd+Q1.Q29_2.Freq_FermFood
Frequency of fermented food	Lactobacillus iners group	0.117155	0.0898118	1.30445	0.19218	0.495986	3043	t22 ~lib_size+read_conc_norm+run20201009_isala_cross_1+run20201016_isala_cross_2+run20201023_isala_cross_3+run20201030_isala_cross_4+run20201106_isala_cross_5+run20201120_isala_cross_6+run20201204_isala_cross_8+run20201211_isala_cross_9+run20210119_isala_cross_7+Q0.Leeftijd+Q1.Q29_2.Freq_FermFood
Frequency of fermented food	Gardnerella	-0.0374434	0.0852657	-0.439138	0.660593	0.862261	3043	t251 ~lib_size+read_conc_norm+run20201009_isala_cross_1+run20201016_isala_cross_2+run20201023_isala_cross_3+run20201030_isala_cross_4+run20201106_isala_cross_5+run20201120_isala_cross_6+run20201204_isala_cross_8+run20201211_isala_cross_9+run20210119_isala_cross_7+Q0.Leeftijd+Q1.Q29_2.Freq_FermFood
Frequency of fermented food	Prevotella	0.00953614	0.0588065	0.162161	0.87119	0.955137	3043	t35 ~lib_size+read_conc_norm+run20201009_isala_cross_1+run20201016_isala_cross_2+run20201023_isala_cross_3+run20201030_isala_cross_4+run20201106_isala_cross_5+run20201120_isala_cross_6+run20201204_isala_cross_8+run20201211_isala_cross_9+run20210119_isala_cross_7+Q0.Leeftijd+Q1.Q29_2.Freq_FermFood
Frequency of fermented food	Lactobacillus jensenii group	0.175027	0.0843771	2.07434	0.0381316	0.206927	3043	t223 ~lib_size+read_conc_norm+run20201009_isala_cross_1+run20201016_isala_cross_2+run20201023_isala_cross_3+run20201030_isala_cross_4+run20201106_isala_cross_5+run20201120_isala_cross_6+run20201204_isala_cross_8+run20201211_isala_cross_9+run20210119_isala_cross_7+Q0.Leeftijd+Q1.Q29_2.Freq_FermFood
Frequency of fermented food	Lactobacillus gasseri group	-0.101843	0.0700961	-1.4529	0.146355	0.43377	3043	t495 ~lib_size+read_conc_norm+run20201009_isala_cross_1+run20201016_isala_cross_2+run20201023_isala_cross_3+run20201030_isala_cross_4+run20201106_isala_cross_5+run20201120_isala_cross_6+run20201204_isala_cross_8+run20201211_isala_cross_9+run20210119_isala_cross_7+Q0.Leeftijd+Q1.Q29_2.Freq_FermFood
Frequency of fermented food	Bifidobacterium	0.0394665	0.0507517	0.777639	0.436843	0.731501	3043	t272 ~lib_size+read_conc_norm+run20201009_isala_cross_1+run20201016_isala_cross_2+run20201023_isala_cross_3+run20201030_isala_cross_4+run20201106_isala_cross_5+run20201120_isala_cross_6+run20201204_isala_cross_8+run20201211_isala_cross_9+run20210119_isala_cross_7+Q0.Leeftijd+Q1.Q29_2.Freq_FermFood
Frequency of fermented food	Anaerococcus	0.002307	0.0562851	0.0409878	0.967308	0.990029	3043	t123 ~lib_size+read_conc_norm+run20201009_isala_cross_1+run20201016_isala_cross_2+run20201023_isala_cross_3+run20201030_isala_cross_4+run20201106_isala_cross_5+run20201120_isala_cross_6+run20201204_isala_cross_8+run20201211_isala_cross_9+run20210119_isala_cross_7+Q0.Leeftijd+Q1.Q29_2.Freq_FermFood
Frequency of fermented food	Finegoldia	-0.00739317	0.048456	-0.152575	0.878744	0.958608	3043	t472 ~lib_size+read_conc_norm+run20201009_isala_cross_1+run20201016_isala_cross_2+run20201023_isala_cross_3+run20201030_isala_cross_4+run20201106_isala_cross_5+run20201120_isala_cross_6+run20201204_isala_cross_8+run20201211_isala_cross_9+run20210119_isala_cross_7+Q0.Leeftijd+Q1.Q29_2.Freq_FermFood
Frequency of fermented food	Limosilactobacillus	0.0250254	0.0688597	0.363426	0.716312	0.890493	3043	t433 ~lib_size+read_conc_norm+run20201009_isala_cross_1+run20201016_isala_cross_2+run20201023_isala_cross_3+run20201030_isala_cross_4+run20201106_isala_cross_5+run20201120_isala_cross_6+run20201204_isala_cross_8+run20201211_isala_cross_9+run20210119_isala_cross_7+Q0.Leeftijd+Q1.Q29_2.Freq_FermFood
Frequency of fermented food	Clostridium	-0.0675483	0.0528442	-1.27826	0.201257	0.506202	3043	t444 ~lib_size+read_conc_norm+run20201009_isala_cross_1+run20201016_isala_cross_2+run20201023_isala_cross_3+run20201030_isala_cross_4+run20201106_isala_cross_5+run20201120_isala_cross_6+run20201204_isala_cross_8+run20201211_isala_cross_9+run20210119_isala_cross_7+Q0.Leeftijd+Q1.Q29_2.Freq_FermFood
Frequency of fermented food	Streptococcus	0.140765	0.0660067	2.13258	0.0330391	0.189087	3043	t11 ~lib_size+read_conc_norm+run20201009_isala_cross_1+run20201016_isala_cross_2+run20201023_isala_cross_3+run20201030_isala_cross_4+run20201106_isala_cross_5+run20201120_isala_cross_6+run20201204_isala_cross_8+run20201211_isala_cross_9+run20210119_isala_cross_7+Q0.Leeftijd+Q1.Q29_2.Freq_FermFood
Frequency of fermented food	eigen_AV	-0.162283	0.121904	-1.33124	0.183212	0.485718	3043	eigen_AV ~lib_size+read_conc_norm+run20201009_isala_cross_1+run20201016_isala_cross_2+run20201023_isala_cross_3+run20201030_isala_cross_4+run20201106_isala_cross_5+run20201120_isala_cross_6+run20201204_isala_cross_8+run20201211_isala_cross_9+run20210119_isala_cross_7+Q0.Leeftijd+Q1.Q29_2.Freq_FermFood
Frequency of fermented food	eigen_BV	-0.0213817	0.112148	-0.190656	0.848808	0.946499	3043	eigen_BV ~lib_size+read_conc_norm+run20201009_isala_cross_1+run20201016_isala_cross_2+run20201023_isala_cross_3+run20201030_isala_cross_4+run20201106_isala_cross_5+run20201120_isala_cross_6+run20201204_isala_cross_8+run20201211_isala_cross_9+run20210119_isala_cross_7+Q0.Leeftijd+Q1.Q29_2.Freq_FermFood
Frequency of fermented food	eigen_Gut	-0.06415	0.0470539	-1.36333	0.17288	0.470821	3043	eigen_Gut ~lib_size+read_conc_norm+run20201009_isala_cross_1+run20201016_isala_cross_2+run20201023_isala_cross_3+run20201030_isala_cross_4+run20201106_isala_cross_5+run20201120_isala_cross_6+run20201204_isala_cross_8+run20201211_isala_cross_9+run20210119_isala_cross_7+Q0.Leeftijd+Q1.Q29_2.Freq_FermFood
Frequency of fermented food	eigen_Lacto	0.1704	0.093621	1.82011	0.0688415	0.291447	3043	eigen_Lacto ~lib_size+read_conc_norm+run20201009_isala_cross_1+run20201016_isala_cross_2+run20201023_isala_cross_3+run20201030_isala_cross_4+run20201106_isala_cross_5+run20201120_isala_cross_6+run20201204_isala_cross_8+run20201211_isala_cross_9+run20210119_isala_cross_7+Q0.Leeftijd+Q1.Q29_2.Freq_FermFood
Frequency of alcohol intake	Lactobacillus crispatus group	0.241173	0.0762775	3.16179	0.0015835	0.0241583	3043	t34 ~lib_size+read_conc_norm+run20201009_isala_cross_1+run20201016_isala_cross_2+run20201023_isala_cross_3+run20201030_isala_cross_4+run20201106_isala_cross_5+run20201120_isala_cross_6+run20201204_isala_cross_8+run20201211_isala_cross_9+run20210119_isala_cross_7+Q0.Leeftijd+Q1.Q29_3.Freq_EtOH
Frequency of alcohol intake	Lactobacillus iners group	0.20255	0.0899145	2.25269	0.0243498	0.156219	3043	t22 ~lib_size+read_conc_norm+run20201009_isala_cross_1+run20201016_isala_cross_2+run20201023_isala_cross_3+run20201030_isala_cross_4+run20201106_isala_cross_5+run20201120_isala_cross_6+run20201204_isala_cross_8+run20201211_isala_cross_9+run20210119_isala_cross_7+Q0.Leeftijd+Q1.Q29_3.Freq_EtOH
Frequency of alcohol intake	Gardnerella	-0.117645	0.0853867	-1.37779	0.16837	0.465339	3043	t251 ~lib_size+read_conc_norm+run20201009_isala_cross_1+run20201016_isala_cross_2+run20201023_isala_cross_3+run20201030_isala_cross_4+run20201106_isala_cross_5+run20201120_isala_cross_6+run20201204_isala_cross_8+run20201211_isala_cross_9+run20210119_isala_cross_7+Q0.Leeftijd+Q1.Q29_3.Freq_EtOH
Frequency of alcohol intake	Prevotella	-0.168284	0.0588274	-2.86064	0.00425685	0.0491849	3043	t35 ~lib_size+read_conc_norm+run20201009_isala_cross_1+run20201016_isala_cross_2+run20201023_isala_cross_3+run20201030_isala_cross_4+run20201106_isala_cross_5+run20201120_isala_cross_6+run20201204_isala_cross_8+run20201211_isala_cross_9+run20210119_isala_cross_7+Q0.Leeftijd+Q1.Q29_3.Freq_EtOH
Frequency of alcohol intake	Lactobacillus jensenii group	0.380415	0.0842978	4.51276	6.64264e-06	0.000295742	3043	t223 ~lib_size+read_conc_norm+run20201009_isala_cross_1+run20201016_isala_cross_2+run20201023_isala_cross_3+run20201030_isala_cross_4+run20201106_isala_cross_5+run20201120_isala_cross_6+run20201204_isala_cross_8+run20201211_isala_cross_9+run20210119_isala_cross_7+Q0.Leeftijd+Q1.Q29_3.Freq_EtOH
Frequency of alcohol intake	Lactobacillus gasseri group	-0.117075	0.0702075	-1.66755	0.0955078	0.343582	3043	t495 ~lib_size+read_conc_norm+run20201009_isala_cross_1+run20201016_isala_cross_2+run20201023_isala_cross_3+run20201030_isala_cross_4+run20201106_isala_cross_5+run20201120_isala_cross_6+run20201204_isala_cross_8+run20201211_isala_cross_9+run20210119_isala_cross_7+Q0.Leeftijd+Q1.Q29_3.Freq_EtOH
Frequency of alcohol intake	Bifidobacterium	-0.22727	0.0506751	-4.48483	7.56818e-06	0.000328035	3043	t272 ~lib_size+read_conc_norm+run20201009_isala_cross_1+run20201016_isala_cross_2+run20201023_isala_cross_3+run20201030_isala_cross_4+run20201106_isala_cross_5+run20201120_isala_cross_6+run20201204_isala_cross_8+run20201211_isala_cross_9+run20210119_isala_cross_7+Q0.Leeftijd+Q1.Q29_3.Freq_EtOH
Frequency of alcohol intake	Anaerococcus	-0.261594	0.0561802	-4.65633	3.3574e-06	0.000163713	3043	t123 ~lib_size+read_conc_norm+run20201009_isala_cross_1+run20201016_isala_cross_2+run20201023_isala_cross_3+run20201030_isala_cross_4+run20201106_isala_cross_5+run20201120_isala_cross_6+run20201204_isala_cross_8+run20201211_isala_cross_9+run20210119_isala_cross_7+Q0.Leeftijd+Q1.Q29_3.Freq_EtOH
Frequency of alcohol intake	Finegoldia	-0.130887	0.0484803	-2.6998	0.00697674	0.0680398	3043	t472 ~lib_size+read_conc_norm+run20201009_isala_cross_1+run20201016_isala_cross_2+run20201023_isala_cross_3+run20201030_isala_cross_4+run20201106_isala_cross_5+run20201120_isala_cross_6+run20201204_isala_cross_8+run20201211_isala_cross_9+run20210119_isala_cross_7+Q0.Leeftijd+Q1.Q29_3.Freq_EtOH
Frequency of alcohol intake	Limosilactobacillus	0.286657	0.0687814	4.16765	3.16366e-05	0.00104083	3043	t433 ~lib_size+read_conc_norm+run20201009_isala_cross_1+run20201016_isala_cross_2+run20201023_isala_cross_3+run20201030_isala_cross_4+run20201106_isala_cross_5+run20201120_isala_cross_6+run20201204_isala_cross_8+run20201211_isala_cross_9+run20210119_isala_cross_7+Q0.Leeftijd+Q1.Q29_3.Freq_EtOH
Frequency of alcohol intake	Clostridium	-0.0940642	0.0529207	-1.77746	0.0755936	0.304227	3043	t444 ~lib_size+read_conc_norm+run20201009_isala_cross_1+run20201016_isala_cross_2+run20201023_isala_cross_3+run20201030_isala_cross_4+run20201106_isala_cross_5+run20201120_isala_cross_6+run20201204_isala_cross_8+run20201211_isala_cross_9+run20210119_isala_cross_7+Q0.Leeftijd+Q1.Q29_3.Freq_EtOH
Frequency of alcohol intake	Streptococcus	-0.154318	0.0661091	-2.3343	0.0196451	0.137432	3043	t11 ~lib_size+read_conc_norm+run20201009_isala_cross_1+run20201016_isala_cross_2+run20201023_isala_cross_3+run20201030_isala_cross_4+run20201106_isala_cross_5+run20201120_isala_cross_6+run20201204_isala_cross_8+run20201211_isala_cross_9+run20210119_isala_cross_7+Q0.Leeftijd+Q1.Q29_3.Freq_EtOH
Frequency of alcohol intake	eigen_AV	-0.566881	0.121712	-4.65757	3.33745e-06	0.000163713	3043	eigen_AV ~lib_size+read_conc_norm+run20201009_isala_cross_1+run20201016_isala_cross_2+run20201023_isala_cross_3+run20201030_isala_cross_4+run20201106_isala_cross_5+run20201120_isala_cross_6+run20201204_isala_cross_8+run20201211_isala_cross_9+run20210119_isala_cross_7+Q0.Leeftijd+Q1.Q29_3.Freq_EtOH
Frequency of alcohol intake	eigen_BV	-0.0701832	0.112332	-0.624782	0.532161	0.794578	3043	eigen_BV ~lib_size+read_conc_norm+run20201009_isala_cross_1+run20201016_isala_cross_2+run20201023_isala_cross_3+run20201030_isala_cross_4+run20201106_isala_cross_5+run20201120_isala_cross_6+run20201204_isala_cross_8+run20201211_isala_cross_9+run20210119_isala_cross_7+Q0.Leeftijd+Q1.Q29_3.Freq_EtOH
Frequency of alcohol intake	eigen_Gut	0.0778948	0.0471272	1.65286	0.0984622	0.348659	3043	eigen_Gut ~lib_size+read_conc_norm+run20201009_isala_cross_1+run20201016_isala_cross_2+run20201023_isala_cross_3+run20201030_isala_cross_4+run20201106_isala_cross_5+run20201120_isala_cross_6+run20201204_isala_cross_8+run20201211_isala_cross_9+run20210119_isala_cross_7+Q0.Leeftijd+Q1.Q29_3.Freq_EtOH
Frequency of alcohol intake	eigen_Lacto	0.533141	0.0933302	5.71242	1.22179e-08	1.13737e-06	3043	eigen_Lacto ~lib_size+read_conc_norm+run20201009_isala_cross_1+run20201016_isala_cross_2+run20201023_isala_cross_3+run20201030_isala_cross_4+run20201106_isala_cross_5+run20201120_isala_cross_6+run20201204_isala_cross_8+run20201211_isala_cross_9+run20210119_isala_cross_7+Q0.Leeftijd+Q1.Q29_3.Freq_EtOH
Frequency of meat	Lactobacillus crispatus group	-0.195218	0.0762835	-2.55911	0.0105422	0.0905258	3043	t34 ~lib_size+read_conc_norm+run20201009_isala_cross_1+run20201016_isala_cross_2+run20201023_isala_cross_3+run20201030_isala_cross_4+run20201106_isala_cross_5+run20201120_isala_cross_6+run20201204_isala_cross_8+run20201211_isala_cross_9+run20210119_isala_cross_7+Q0.Leeftijd+Q1.Q29_4.Freq_Meat
Frequency of meat	Lactobacillus iners group	-0.125645	0.0899168	-1.39735	0.162411	0.45752	3043	t22 ~lib_size+read_conc_norm+run20201009_isala_cross_1+run20201016_isala_cross_2+run20201023_isala_cross_3+run20201030_isala_cross_4+run20201106_isala_cross_5+run20201120_isala_cross_6+run20201204_isala_cross_8+run20201211_isala_cross_9+run20210119_isala_cross_7+Q0.Leeftijd+Q1.Q29_4.Freq_Meat
Frequency of meat	Gardnerella	0.147717	0.0853295	1.73114	0.0835291	0.320115	3043	t251 ~lib_size+read_conc_norm+run20201009_isala_cross_1+run20201016_isala_cross_2+run20201023_isala_cross_3+run20201030_isala_cross_4+run20201106_isala_cross_5+run20201120_isala_cross_6+run20201204_isala_cross_8+run20201211_isala_cross_9+run20210119_isala_cross_7+Q0.Leeftijd+Q1.Q29_4.Freq_Meat
Frequency of meat	Prevotella	0.18594	0.058781	3.16327	0.00157549	0.0241242	3043	t35 ~lib_size+read_conc_norm+run20201009_isala_cross_1+run20201016_isala_cross_2+run20201023_isala_cross_3+run20201030_isala_cross_4+run20201106_isala_cross_5+run20201120_isala_cross_6+run20201204_isala_cross_8+run20201211_isala_cross_9+run20210119_isala_cross_7+Q0.Leeftijd+Q1.Q29_4.Freq_Meat
Frequency of meat	Lactobacillus jensenii group	-0.327521	0.0843297	-3.88382	0.000105025	0.00276645	3043	t223 ~lib_size+read_conc_norm+run20201009_isala_cross_1+run20201016_isala_cross_2+run20201023_isala_cross_3+run20201030_isala_cross_4+run20201106_isala_cross_5+run20201120_isala_cross_6+run20201204_isala_cross_8+run20201211_isala_cross_9+run20210119_isala_cross_7+Q0.Leeftijd+Q1.Q29_4.Freq_Meat
Frequency of meat	Lactobacillus gasseri group	0.103952	0.07018	1.48122	0.138651	0.422712	3043	t495 ~lib_size+read_conc_norm+run20201009_isala_cross_1+run20201016_isala_cross_2+run20201023_isala_cross_3+run20201030_isala_cross_4+run20201106_isala_cross_5+run20201120_isala_cross_6+run20201204_isala_cross_8+run20201211_isala_cross_9+run20210119_isala_cross_7+Q0.Leeftijd+Q1.Q29_4.Freq_Meat
Frequency of meat	Bifidobacterium	0.118158	0.0507728	2.32718	0.0200213	0.139226	3043	t272 ~lib_size+read_conc_norm+run20201009_isala_cross_1+run20201016_isala_cross_2+run20201023_isala_cross_3+run20201030_isala_cross_4+run20201106_isala_cross_5+run20201120_isala_cross_6+run20201204_isala_cross_8+run20201211_isala_cross_9+run20210119_isala_cross_7+Q0.Leeftijd+Q1.Q29_4.Freq_Meat
Frequency of meat	Anaerococcus	0.149224	0.0562881	2.65107	0.00806542	0.0752952	3043	t123 ~lib_size+read_conc_norm+run20201009_isala_cross_1+run20201016_isala_cross_2+run20201023_isala_cross_3+run20201030_isala_cross_4+run20201106_isala_cross_5+run20201120_isala_cross_6+run20201204_isala_cross_8+run20201211_isala_cross_9+run20210119_isala_cross_7+Q0.Leeftijd+Q1.Q29_4.Freq_Meat
Frequency of meat	Finegoldia	0.163836	0.0484235	3.3834	0.000725046	0.0126643	3043	t472 ~lib_size+read_conc_norm+run20201009_isala_cross_1+run20201016_isala_cross_2+run20201023_isala_cross_3+run20201030_isala_cross_4+run20201106_isala_cross_5+run20201120_isala_cross_6+run20201204_isala_cross_8+run20201211_isala_cross_9+run20210119_isala_cross_7+Q0.Leeftijd+Q1.Q29_4.Freq_Meat
Frequency of meat	Limosilactobacillus	-0.365072	0.0686248	-5.31983	1.11427e-07	8.6934e-06	3043	t433 ~lib_size+read_conc_norm+run20201009_isala_cross_1+run20201016_isala_cross_2+run20201023_isala_cross_3+run20201030_isala_cross_4+run20201106_isala_cross_5+run20201120_isala_cross_6+run20201204_isala_cross_8+run20201211_isala_cross_9+run20210119_isala_cross_7+Q0.Leeftijd+Q1.Q29_4.Freq_Meat
Frequency of meat	Clostridium	0.0736165	0.0529055	1.39147	0.164185	0.459986	3043	t444 ~lib_size+read_conc_norm+run20201009_isala_cross_1+run20201016_isala_cross_2+run20201023_isala_cross_3+run20201030_isala_cross_4+run20201106_isala_cross_5+run20201120_isala_cross_6+run20201204_isala_cross_8+run20201211_isala_cross_9+run20210119_isala_cross_7+Q0.Leeftijd+Q1.Q29_4.Freq_Meat
Frequency of meat	Streptococcus	0.12223	0.0660989	1.84919	0.0645275	0.280429	3043	t11 ~lib_size+read_conc_norm+run20201009_isala_cross_1+run20201016_isala_cross_2+run20201023_isala_cross_3+run20201030_isala_cross_4+run20201106_isala_cross_5+run20201120_isala_cross_6+run20201204_isala_cross_8+run20201211_isala_cross_9+run20210119_isala_cross_7+Q0.Leeftijd+Q1.Q29_4.Freq_Meat
Frequency of meat	eigen_AV	0.548331	0.12168	4.50633	6.84546e-06	0.000303125	3043	eigen_AV ~lib_size+read_conc_norm+run20201009_isala_cross_1+run20201016_isala_cross_2+run20201023_isala_cross_3+run20201030_isala_cross_4+run20201106_isala_cross_5+run20201120_isala_cross_6+run20201204_isala_cross_8+run20201211_isala_cross_9+run20210119_isala_cross_7+Q0.Leeftijd+Q1.Q29_4.Freq_Meat
Frequency of meat	eigen_BV	0.13724	0.112257	1.22256	0.221593	0.53501	3043	eigen_BV ~lib_size+read_conc_norm+run20201009_isala_cross_1+run20201016_isala_cross_2+run20201023_isala_cross_3+run20201030_isala_cross_4+run20201106_isala_cross_5+run20201120_isala_cross_6+run20201204_isala_cross_8+run20201211_isala_cross_9+run20210119_isala_cross_7+Q0.Leeftijd+Q1.Q29_4.Freq_Meat
Frequency of meat	eigen_Gut	0.0259559	0.047123	0.550813	0.581803	0.825613	3043	eigen_Gut ~lib_size+read_conc_norm+run20201009_isala_cross_1+run20201016_isala_cross_2+run20201023_isala_cross_3+run20201030_isala_cross_4+run20201106_isala_cross_5+run20201120_isala_cross_6+run20201204_isala_cross_8+run20201211_isala_cross_9+run20210119_isala_cross_7+Q0.Leeftijd+Q1.Q29_4.Freq_Meat
Frequency of meat	eigen_Lacto	-0.512829	0.0933217	-5.49528	4.22429e-08	3.53116e-06	3043	eigen_Lacto ~lib_size+read_conc_norm+run20201009_isala_cross_1+run20201016_isala_cross_2+run20201023_isala_cross_3+run20201030_isala_cross_4+run20201106_isala_cross_5+run20201120_isala_cross_6+run20201204_isala_cross_8+run20201211_isala_cross_9+run20210119_isala_cross_7+Q0.Leeftijd+Q1.Q29_4.Freq_Meat
Frequency of animal products	Lactobacillus crispatus group	-0.0964699	0.0761264	-1.26723	0.205169	0.512579	3043	t34 ~lib_size+read_conc_norm+run20201009_isala_cross_1+run20201016_isala_cross_2+run20201023_isala_cross_3+run20201030_isala_cross_4+run20201106_isala_cross_5+run20201120_isala_cross_6+run20201204_isala_cross_8+run20201211_isala_cross_9+run20210119_isala_cross_7+Q0.Leeftijd+Q1.Q29_5.Freq_Animal_Prod
Frequency of animal products	Lactobacillus iners group	0.0735872	0.0896775	0.820576	0.411953	0.714377	3043	t22 ~lib_size+read_conc_norm+run20201009_isala_cross_1+run20201016_isala_cross_2+run20201023_isala_cross_3+run20201030_isala_cross_4+run20201106_isala_cross_5+run20201120_isala_cross_6+run20201204_isala_cross_8+run20201211_isala_cross_9+run20210119_isala_cross_7+Q0.Leeftijd+Q1.Q29_5.Freq_Animal_Prod
Frequency of animal products	Gardnerella	0.15761	0.0850784	1.85252	0.0640477	0.279978	3043	t251 ~lib_size+read_conc_norm+run20201009_isala_cross_1+run20201016_isala_cross_2+run20201023_isala_cross_3+run20201030_isala_cross_4+run20201106_isala_cross_5+run20201120_isala_cross_6+run20201204_isala_cross_8+run20201211_isala_cross_9+run20210119_isala_cross_7+Q0.Leeftijd+Q1.Q29_5.Freq_Animal_Prod
Frequency of animal products	Prevotella	0.0713143	0.0586946	1.21501	0.224459	0.538316	3043	t35 ~lib_size+read_conc_norm+run20201009_isala_cross_1+run20201016_isala_cross_2+run20201023_isala_cross_3+run20201030_isala_cross_4+run20201106_isala_cross_5+run20201120_isala_cross_6+run20201204_isala_cross_8+run20201211_isala_cross_9+run20210119_isala_cross_7+Q0.Leeftijd+Q1.Q29_5.Freq_Animal_Prod
Frequency of animal products	Lactobacillus jensenii group	0.112204	0.0842719	1.33145	0.18314	0.485718	3043	t223 ~lib_size+read_conc_norm+run20201009_isala_cross_1+run20201016_isala_cross_2+run20201023_isala_cross_3+run20201030_isala_cross_4+run20201106_isala_cross_5+run20201120_isala_cross_6+run20201204_isala_cross_8+run20201211_isala_cross_9+run20210119_isala_cross_7+Q0.Leeftijd+Q1.Q29_5.Freq_Animal_Prod
Frequency of animal products	Lactobacillus gasseri group	-0.0382147	0.0700003	-0.545922	0.58516	0.827082	3043	t495 ~lib_size+read_conc_norm+run20201009_isala_cross_1+run20201016_isala_cross_2+run20201023_isala_cross_3+run20201030_isala_cross_4+run20201106_isala_cross_5+run20201120_isala_cross_6+run20201204_isala_cross_8+run20201211_isala_cross_9+run20210119_isala_cross_7+Q0.Leeftijd+Q1.Q29_5.Freq_Animal_Prod
Frequency of animal products	Bifidobacterium	0.0553243	0.0506623	1.09202	0.274911	0.59761	3043	t272 ~lib_size+read_conc_norm+run20201009_isala_cross_1+run20201016_isala_cross_2+run20201023_isala_cross_3+run20201030_isala_cross_4+run20201106_isala_cross_5+run20201120_isala_cross_6+run20201204_isala_cross_8+run20201211_isala_cross_9+run20210119_isala_cross_7+Q0.Leeftijd+Q1.Q29_5.Freq_Animal_Prod
Frequency of animal products	Anaerococcus	0.00836261	0.0561913	0.148824	0.881702	0.958608	3043	t123 ~lib_size+read_conc_norm+run20201009_isala_cross_1+run20201016_isala_cross_2+run20201023_isala_cross_3+run20201030_isala_cross_4+run20201106_isala_cross_5+run20201120_isala_cross_6+run20201204_isala_cross_8+run20201211_isala_cross_9+run20210119_isala_cross_7+Q0.Leeftijd+Q1.Q29_5.Freq_Animal_Prod
Frequency of animal products	Finegoldia	0.107063	0.0483364	2.21494	0.026838	0.163706	3043	t472 ~lib_size+read_conc_norm+run20201009_isala_cross_1+run20201016_isala_cross_2+run20201023_isala_cross_3+run20201030_isala_cross_4+run20201106_isala_cross_5+run20201120_isala_cross_6+run20201204_isala_cross_8+run20201211_isala_cross_9+run20210119_isala_cross_7+Q0.Leeftijd+Q1.Q29_5.Freq_Animal_Prod
Frequency of animal products	Limosilactobacillus	-0.103366	0.0687209	-1.50415	0.132648	0.412914	3043	t433 ~lib_size+read_conc_norm+run20201009_isala_cross_1+run20201016_isala_cross_2+run20201023_isala_cross_3+run20201030_isala_cross_4+run20201106_isala_cross_5+run20201120_isala_cross_6+run20201204_isala_cross_8+run20201211_isala_cross_9+run20210119_isala_cross_7+Q0.Leeftijd+Q1.Q29_5.Freq_Animal_Prod
Frequency of animal products	Clostridium	-0.0274806	0.0527681	-0.520781	0.602558	0.836241	3043	t444 ~lib_size+read_conc_norm+run20201009_isala_cross_1+run20201016_isala_cross_2+run20201023_isala_cross_3+run20201030_isala_cross_4+run20201106_isala_cross_5+run20201120_isala_cross_6+run20201204_isala_cross_8+run20201211_isala_cross_9+run20210119_isala_cross_7+Q0.Leeftijd+Q1.Q29_5.Freq_Animal_Prod
Frequency of animal products	Streptococcus	0.0281828	0.0659443	0.427373	0.669138	0.867888	3043	t11 ~lib_size+read_conc_norm+run20201009_isala_cross_1+run20201016_isala_cross_2+run20201023_isala_cross_3+run20201030_isala_cross_4+run20201106_isala_cross_5+run20201120_isala_cross_6+run20201204_isala_cross_8+run20201211_isala_cross_9+run20210119_isala_cross_7+Q0.Leeftijd+Q1.Q29_5.Freq_Animal_Prod
Frequency of animal products	eigen_AV	0.210683	0.121676	1.7315	0.0834638	0.320115	3043	eigen_AV ~lib_size+read_conc_norm+run20201009_isala_cross_1+run20201016_isala_cross_2+run20201023_isala_cross_3+run20201030_isala_cross_4+run20201106_isala_cross_5+run20201120_isala_cross_6+run20201204_isala_cross_8+run20201211_isala_cross_9+run20210119_isala_cross_7+Q0.Leeftijd+Q1.Q29_5.Freq_Animal_Prod
Frequency of animal products	eigen_BV	0.0282103	0.111961	0.251965	0.801085	0.93019	3043	eigen_BV ~lib_size+read_conc_norm+run20201009_isala_cross_1+run20201016_isala_cross_2+run20201023_isala_cross_3+run20201030_isala_cross_4+run20201106_isala_cross_5+run20201120_isala_cross_6+run20201204_isala_cross_8+run20201211_isala_cross_9+run20210119_isala_cross_7+Q0.Leeftijd+Q1.Q29_5.Freq_Animal_Prod
Frequency of animal products	eigen_Gut	-0.0733865	0.0469711	-1.56237	0.118304	0.384782	3043	eigen_Gut ~lib_size+read_conc_norm+run20201009_isala_cross_1+run20201016_isala_cross_2+run20201023_isala_cross_3+run20201030_isala_cross_4+run20201106_isala_cross_5+run20201120_isala_cross_6+run20201204_isala_cross_8+run20201211_isala_cross_9+run20210119_isala_cross_7+Q0.Leeftijd+Q1.Q29_5.Freq_Animal_Prod
Frequency of animal products	eigen_Lacto	-0.0210718	0.0935155	-0.225329	0.821738	0.936854	3043	eigen_Lacto ~lib_size+read_conc_norm+run20201009_isala_cross_1+run20201016_isala_cross_2+run20201023_isala_cross_3+run20201030_isala_cross_4+run20201106_isala_cross_5+run20201120_isala_cross_6+run20201204_isala_cross_8+run20201211_isala_cross_9+run20210119_isala_cross_7+Q0.Leeftijd+Q1.Q29_5.Freq_Animal_Prod
Frequency of fish	Lactobacillus crispatus group	-0.126687	0.0768019	-1.64953	0.0991436	0.349929	3043	t34 ~lib_size+read_conc_norm+run20201009_isala_cross_1+run20201016_isala_cross_2+run20201023_isala_cross_3+run20201030_isala_cross_4+run20201106_isala_cross_5+run20201120_isala_cross_6+run20201204_isala_cross_8+run20201211_isala_cross_9+run20210119_isala_cross_7+Q0.Leeftijd+Q1.Q29_6.Freq_Fish
Frequency of fish	Lactobacillus iners group	0.00242211	0.0904999	0.0267637	0.97865	0.994184	3043	t22 ~lib_size+read_conc_norm+run20201009_isala_cross_1+run20201016_isala_cross_2+run20201023_isala_cross_3+run20201030_isala_cross_4+run20201106_isala_cross_5+run20201120_isala_cross_6+run20201204_isala_cross_8+run20201211_isala_cross_9+run20210119_isala_cross_7+Q0.Leeftijd+Q1.Q29_6.Freq_Fish
Frequency of fish	Gardnerella	0.108488	0.0858751	1.26332	0.20657	0.514061	3043	t251 ~lib_size+read_conc_norm+run20201009_isala_cross_1+run20201016_isala_cross_2+run20201023_isala_cross_3+run20201030_isala_cross_4+run20201106_isala_cross_5+run20201120_isala_cross_6+run20201204_isala_cross_8+run20201211_isala_cross_9+run20210119_isala_cross_7+Q0.Leeftijd+Q1.Q29_6.Freq_Fish
Frequency of fish	Prevotella	0.0681696	0.0592278	1.15097	0.249834	0.568353	3043	t35 ~lib_size+read_conc_norm+run20201009_isala_cross_1+run20201016_isala_cross_2+run20201023_isala_cross_3+run20201030_isala_cross_4+run20201106_isala_cross_5+run20201120_isala_cross_6+run20201204_isala_cross_8+run20201211_isala_cross_9+run20210119_isala_cross_7+Q0.Leeftijd+Q1.Q29_6.Freq_Fish
Frequency of fish	Lactobacillus jensenii group	-0.0701973	0.0850506	-0.82536	0.409232	0.712525	3043	t223 ~lib_size+read_conc_norm+run20201009_isala_cross_1+run20201016_isala_cross_2+run20201023_isala_cross_3+run20201030_isala_cross_4+run20201106_isala_cross_5+run20201120_isala_cross_6+run20201204_isala_cross_8+run20201211_isala_cross_9+run20210119_isala_cross_7+Q0.Leeftijd+Q1.Q29_6.Freq_Fish
Frequency of fish	Lactobacillus gasseri group	0.00686741	0.0706378	0.0972201	0.922558	0.976432	3043	t495 ~lib_size+read_conc_norm+run20201009_isala_cross_1+run20201016_isala_cross_2+run20201023_isala_cross_3+run20201030_isala_cross_4+run20201106_isala_cross_5+run20201120_isala_cross_6+run20201204_isala_cross_8+run20201211_isala_cross_9+run20210119_isala_cross_7+Q0.Leeftijd+Q1.Q29_6.Freq_Fish
Frequency of fish	Bifidobacterium	0.0298139	0.0511284	0.583118	0.559857	0.812366	3043	t272 ~lib_size+read_conc_norm+run20201009_isala_cross_1+run20201016_isala_cross_2+run20201023_isala_cross_3+run20201030_isala_cross_4+run20201106_isala_cross_5+run20201120_isala_cross_6+run20201204_isala_cross_8+run20201211_isala_cross_9+run20210119_isala_cross_7+Q0.Leeftijd+Q1.Q29_6.Freq_Fish
Frequency of fish	Anaerococcus	0.0347953	0.056697	0.613707	0.539455	0.799424	3043	t123 ~lib_size+read_conc_norm+run20201009_isala_cross_1+run20201016_isala_cross_2+run20201023_isala_cross_3+run20201030_isala_cross_4+run20201106_isala_cross_5+run20201120_isala_cross_6+run20201204_isala_cross_8+run20201211_isala_cross_9+run20210119_isala_cross_7+Q0.Leeftijd+Q1.Q29_6.Freq_Fish
Frequency of fish	Finegoldia	0.101798	0.0487787	2.08693	0.0369776	0.203011	3043	t472 ~lib_size+read_conc_norm+run20201009_isala_cross_1+run20201016_isala_cross_2+run20201023_isala_cross_3+run20201030_isala_cross_4+run20201106_isala_cross_5+run20201120_isala_cross_6+run20201204_isala_cross_8+run20201211_isala_cross_9+run20210119_isala_cross_7+Q0.Leeftijd+Q1.Q29_6.Freq_Fish
Frequency of fish	Limosilactobacillus	-0.194306	0.0692794	-2.80467	0.00506892	0.0558669	3043	t433 ~lib_size+read_conc_norm+run20201009_isala_cross_1+run20201016_isala_cross_2+run20201023_isala_cross_3+run20201030_isala_cross_4+run20201106_isala_cross_5+run20201120_isala_cross_6+run20201204_isala_cross_8+run20201211_isala_cross_9+run20210119_isala_cross_7+Q0.Leeftijd+Q1.Q29_6.Freq_Fish
Frequency of fish	Clostridium	-0.0541573	0.0532394	-1.01724	0.309119	0.632329	3043	t444 ~lib_size+read_conc_norm+run20201009_isala_cross_1+run20201016_isala_cross_2+run20201023_isala_cross_3+run20201030_isala_cross_4+run20201106_isala_cross_5+run20201120_isala_cross_6+run20201204_isala_cross_8+run20201211_isala_cross_9+run20210119_isala_cross_7+Q0.Leeftijd+Q1.Q29_6.Freq_Fish
Frequency of fish	Streptococcus	0.176195	0.0664666	2.65088	0.00806997	0.0752952	3043	t11 ~lib_size+read_conc_norm+run20201009_isala_cross_1+run20201016_isala_cross_2+run20201023_isala_cross_3+run20201030_isala_cross_4+run20201106_isala_cross_5+run20201120_isala_cross_6+run20201204_isala_cross_8+run20201211_isala_cross_9+run20210119_isala_cross_7+Q0.Leeftijd+Q1.Q29_6.Freq_Fish
Frequency of fish	eigen_AV	0.147402	0.12281	1.20024	0.230139	0.545096	3043	eigen_AV ~lib_size+read_conc_norm+run20201009_isala_cross_1+run20201016_isala_cross_2+run20201023_isala_cross_3+run20201030_isala_cross_4+run20201106_isala_cross_5+run20201120_isala_cross_6+run20201204_isala_cross_8+run20201211_isala_cross_9+run20210119_isala_cross_7+Q0.Leeftijd+Q1.Q29_6.Freq_Fish
Frequency of fish	eigen_BV	0.0868457	0.112965	0.768781	0.442083	0.734891	3043	eigen_BV ~lib_size+read_conc_norm+run20201009_isala_cross_1+run20201016_isala_cross_2+run20201023_isala_cross_3+run20201030_isala_cross_4+run20201106_isala_cross_5+run20201120_isala_cross_6+run20201204_isala_cross_8+run20201211_isala_cross_9+run20210119_isala_cross_7+Q0.Leeftijd+Q1.Q29_6.Freq_Fish
Frequency of fish	eigen_Gut	0.0579762	0.047404	1.22302	0.221416	0.534741	3043	eigen_Gut ~lib_size+read_conc_norm+run20201009_isala_cross_1+run20201016_isala_cross_2+run20201023_isala_cross_3+run20201030_isala_cross_4+run20201106_isala_cross_5+run20201120_isala_cross_6+run20201204_isala_cross_8+run20201211_isala_cross_9+run20210119_isala_cross_7+Q0.Leeftijd+Q1.Q29_6.Freq_Fish
Frequency of fish	eigen_Lacto	-0.2108	0.0942856	-2.23576	0.0254403	0.160199	3043	eigen_Lacto ~lib_size+read_conc_norm+run20201009_isala_cross_1+run20201016_isala_cross_2+run20201023_isala_cross_3+run20201030_isala_cross_4+run20201106_isala_cross_5+run20201120_isala_cross_6+run20201204_isala_cross_8+run20201211_isala_cross_9+run20210119_isala_cross_7+Q0.Leeftijd+Q1.Q29_6.Freq_Fish
Frequency of sugary beverages	Lactobacillus crispatus group	-0.259442	0.0776034	-3.34318	0.0008383	0.0143668	3043	t34 ~lib_size+read_conc_norm+run20201009_isala_cross_1+run20201016_isala_cross_2+run20201023_isala_cross_3+run20201030_isala_cross_4+run20201106_isala_cross_5+run20201120_isala_cross_6+run20201204_isala_cross_8+run20201211_isala_cross_9+run20210119_isala_cross_7+Q0.Leeftijd+Q1.Q29_7.Freq_Sugar_Beverages
Frequency of sugary beverages	Lactobacillus iners group	-0.0841708	0.0915591	-0.919306	0.358009	0.674107	3043	t22 ~lib_size+read_conc_norm+run20201009_isala_cross_1+run20201016_isala_cross_2+run20201023_isala_cross_3+run20201030_isala_cross_4+run20201106_isala_cross_5+run20201120_isala_cross_6+run20201204_isala_cross_8+run20201211_isala_cross_9+run20210119_isala_cross_7+Q0.Leeftijd+Q1.Q29_7.Freq_Sugar_Beverages
Frequency of sugary beverages	Gardnerella	0.254615	0.0867919	2.93363	0.00337541	0.0414777	3043	t251 ~lib_size+read_conc_norm+run20201009_isala_cross_1+run20201016_isala_cross_2+run20201023_isala_cross_3+run20201030_isala_cross_4+run20201106_isala_cross_5+run20201120_isala_cross_6+run20201204_isala_cross_8+run20201211_isala_cross_9+run20210119_isala_cross_7+Q0.Leeftijd+Q1.Q29_7.Freq_Sugar_Beverages
Frequency of sugary beverages	Prevotella	0.0113466	0.0599421	0.189294	0.849875	0.94654	3043	t35 ~lib_size+read_conc_norm+run20201009_isala_cross_1+run20201016_isala_cross_2+run20201023_isala_cross_3+run20201030_isala_cross_4+run20201106_isala_cross_5+run20201120_isala_cross_6+run20201204_isala_cross_8+run20201211_isala_cross_9+run20210119_isala_cross_7+Q0.Leeftijd+Q1.Q29_7.Freq_Sugar_Beverages
Frequency of sugary beverages	Lactobacillus jensenii group	-0.163804	0.0860162	-1.90434	0.0569609	0.262001	3043	t223 ~lib_size+read_conc_norm+run20201009_isala_cross_1+run20201016_isala_cross_2+run20201023_isala_cross_3+run20201030_isala_cross_4+run20201106_isala_cross_5+run20201120_isala_cross_6+run20201204_isala_cross_8+run20201211_isala_cross_9+run20210119_isala_cross_7+Q0.Leeftijd+Q1.Q29_7.Freq_Sugar_Beverages
Frequency of sugary beverages	Lactobacillus gasseri group	0.0652456	0.0714648	0.912976	0.361328	0.677345	3043	t495 ~lib_size+read_conc_norm+run20201009_isala_cross_1+run20201016_isala_cross_2+run20201023_isala_cross_3+run20201030_isala_cross_4+run20201106_isala_cross_5+run20201120_isala_cross_6+run20201204_isala_cross_8+run20201211_isala_cross_9+run20210119_isala_cross_7+Q0.Leeftijd+Q1.Q29_7.Freq_Sugar_Beverages
Frequency of sugary beverages	Bifidobacterium	0.0273979	0.0517345	0.529586	0.596438	0.833857	3043	t272 ~lib_size+read_conc_norm+run20201009_isala_cross_1+run20201016_isala_cross_2+run20201023_isala_cross_3+run20201030_isala_cross_4+run20201106_isala_cross_5+run20201120_isala_cross_6+run20201204_isala_cross_8+run20201211_isala_cross_9+run20210119_isala_cross_7+Q0.Leeftijd+Q1.Q29_7.Freq_Sugar_Beverages
Frequency of sugary beverages	Anaerococcus	-0.00135069	0.0573721	-0.0235427	0.981219	0.995189	3043	t123 ~lib_size+read_conc_norm+run20201009_isala_cross_1+run20201016_isala_cross_2+run20201023_isala_cross_3+run20201030_isala_cross_4+run20201106_isala_cross_5+run20201120_isala_cross_6+run20201204_isala_cross_8+run20201211_isala_cross_9+run20210119_isala_cross_7+Q0.Leeftijd+Q1.Q29_7.Freq_Sugar_Beverages
Frequency of sugary beverages	Finegoldia	-0.0268537	0.0493895	-0.543713	0.586679	0.828348	3043	t472 ~lib_size+read_conc_norm+run20201009_isala_cross_1+run20201016_isala_cross_2+run20201023_isala_cross_3+run20201030_isala_cross_4+run20201106_isala_cross_5+run20201120_isala_cross_6+run20201204_isala_cross_8+run20201211_isala_cross_9+run20210119_isala_cross_7+Q0.Leeftijd+Q1.Q29_7.Freq_Sugar_Beverages
Frequency of sugary beverages	Limosilactobacillus	-0.218747	0.0700784	-3.12146	0.00181651	0.0265781	3043	t433 ~lib_size+read_conc_norm+run20201009_isala_cross_1+run20201016_isala_cross_2+run20201023_isala_cross_3+run20201030_isala_cross_4+run20201106_isala_cross_5+run20201120_isala_cross_6+run20201204_isala_cross_8+run20201211_isala_cross_9+run20210119_isala_cross_7+Q0.Leeftijd+Q1.Q29_7.Freq_Sugar_Beverages
Frequency of sugary beverages	Clostridium	-0.0565145	0.0538694	-1.0491	0.294215	0.619045	3043	t444 ~lib_size+read_conc_norm+run20201009_isala_cross_1+run20201016_isala_cross_2+run20201023_isala_cross_3+run20201030_isala_cross_4+run20201106_isala_cross_5+run20201120_isala_cross_6+run20201204_isala_cross_8+run20201211_isala_cross_9+run20210119_isala_cross_7+Q0.Leeftijd+Q1.Q29_7.Freq_Sugar_Beverages
Frequency of sugary beverages	Streptococcus	-0.0435311	0.0673272	-0.64656	0.517966	0.787685	3043	t11 ~lib_size+read_conc_norm+run20201009_isala_cross_1+run20201016_isala_cross_2+run20201023_isala_cross_3+run20201030_isala_cross_4+run20201106_isala_cross_5+run20201120_isala_cross_6+run20201204_isala_cross_8+run20201211_isala_cross_9+run20210119_isala_cross_7+Q0.Leeftijd+Q1.Q29_7.Freq_Sugar_Beverages
Frequency of sugary beverages	eigen_AV	-0.0174744	0.124294	-0.140589	0.888204	0.961591	3043	eigen_AV ~lib_size+read_conc_norm+run20201009_isala_cross_1+run20201016_isala_cross_2+run20201023_isala_cross_3+run20201030_isala_cross_4+run20201106_isala_cross_5+run20201120_isala_cross_6+run20201204_isala_cross_8+run20201211_isala_cross_9+run20210119_isala_cross_7+Q0.Leeftijd+Q1.Q29_7.Freq_Sugar_Beverages
Frequency of sugary beverages	eigen_BV	0.320098	0.114167	2.80378	0.00508293	0.0558669	3043	eigen_BV ~lib_size+read_conc_norm+run20201009_isala_cross_1+run20201016_isala_cross_2+run20201023_isala_cross_3+run20201030_isala_cross_4+run20201106_isala_cross_5+run20201120_isala_cross_6+run20201204_isala_cross_8+run20201211_isala_cross_9+run20210119_isala_cross_7+Q0.Leeftijd+Q1.Q29_7.Freq_Sugar_Beverages
Frequency of sugary beverages	eigen_Gut	-0.0951624	0.0479462	-1.98478	0.0472595	0.235493	3043	eigen_Gut ~lib_size+read_conc_norm+run20201009_isala_cross_1+run20201016_isala_cross_2+run20201023_isala_cross_3+run20201030_isala_cross_4+run20201106_isala_cross_5+run20201120_isala_cross_6+run20201204_isala_cross_8+run20201211_isala_cross_9+run20210119_isala_cross_7+Q0.Leeftijd+Q1.Q29_7.Freq_Sugar_Beverages
Frequency of sugary beverages	eigen_Lacto	-0.354984	0.0952631	-3.72636	0.000197812	0.00459059	3043	eigen_Lacto ~lib_size+read_conc_norm+run20201009_isala_cross_1+run20201016_isala_cross_2+run20201023_isala_cross_3+run20201030_isala_cross_4+run20201106_isala_cross_5+run20201120_isala_cross_6+run20201204_isala_cross_8+run20201211_isala_cross_9+run20210119_isala_cross_7+Q0.Leeftijd+Q1.Q29_7.Freq_Sugar_Beverages
Frequency of light beverages	Lactobacillus crispatus group	0.108878	0.0761224	1.4303	0.152734	0.442824	3043	t34 ~lib_size+read_conc_norm+run20201009_isala_cross_1+run20201016_isala_cross_2+run20201023_isala_cross_3+run20201030_isala_cross_4+run20201106_isala_cross_5+run20201120_isala_cross_6+run20201204_isala_cross_8+run20201211_isala_cross_9+run20210119_isala_cross_7+Q0.Leeftijd+Q1.Q29_8.Freq_Light_Beverages
Frequency of light beverages	Lactobacillus iners group	-0.388189	0.0894116	-4.34159	1.46089e-05	0.000555272	3043	t22 ~lib_size+read_conc_norm+run20201009_isala_cross_1+run20201016_isala_cross_2+run20201023_isala_cross_3+run20201030_isala_cross_4+run20201106_isala_cross_5+run20201120_isala_cross_6+run20201204_isala_cross_8+run20201211_isala_cross_9+run20210119_isala_cross_7+Q0.Leeftijd+Q1.Q29_8.Freq_Light_Beverages
Frequency of light beverages	Gardnerella	0.0506437	0.0851233	0.594945	0.551924	0.807531	3043	t251 ~lib_size+read_conc_norm+run20201009_isala_cross_1+run20201016_isala_cross_2+run20201023_isala_cross_3+run20201030_isala_cross_4+run20201106_isala_cross_5+run20201120_isala_cross_6+run20201204_isala_cross_8+run20201211_isala_cross_9+run20210119_isala_cross_7+Q0.Leeftijd+Q1.Q29_8.Freq_Light_Beverages
Frequency of light beverages	Prevotella	0.0532989	0.0587021	0.907955	0.363974	0.679043	3043	t35 ~lib_size+read_conc_norm+run20201009_isala_cross_1+run20201016_isala_cross_2+run20201023_isala_cross_3+run20201030_isala_cross_4+run20201106_isala_cross_5+run20201120_isala_cross_6+run20201204_isala_cross_8+run20201211_isala_cross_9+run20210119_isala_cross_7+Q0.Leeftijd+Q1.Q29_8.Freq_Light_Beverages
Frequency of light beverages	Lactobacillus jensenii group	-0.0370234	0.0842955	-0.43921	0.660541	0.862261	3043	t223 ~lib_size+read_conc_norm+run20201009_isala_cross_1+run20201016_isala_cross_2+run20201023_isala_cross_3+run20201030_isala_cross_4+run20201106_isala_cross_5+run20201120_isala_cross_6+run20201204_isala_cross_8+run20201211_isala_cross_9+run20210119_isala_cross_7+Q0.Leeftijd+Q1.Q29_8.Freq_Light_Beverages
Frequency of light beverages	Lactobacillus gasseri group	0.180264	0.0699286	2.57783	0.009989	0.0876123	3043	t495 ~lib_size+read_conc_norm+run20201009_isala_cross_1+run20201016_isala_cross_2+run20201023_isala_cross_3+run20201030_isala_cross_4+run20201106_isala_cross_5+run20201120_isala_cross_6+run20201204_isala_cross_8+run20201211_isala_cross_9+run20210119_isala_cross_7+Q0.Leeftijd+Q1.Q29_8.Freq_Light_Beverages
Frequency of light beverages	Bifidobacterium	0.091811	0.0506458	1.81281	0.0699608	0.293305	3043	t272 ~lib_size+read_conc_norm+run20201009_isala_cross_1+run20201016_isala_cross_2+run20201023_isala_cross_3+run20201030_isala_cross_4+run20201106_isala_cross_5+run20201120_isala_cross_6+run20201204_isala_cross_8+run20201211_isala_cross_9+run20210119_isala_cross_7+Q0.Leeftijd+Q1.Q29_8.Freq_Light_Beverages
Frequency of light beverages	Anaerococcus	0.0481831	0.0561858	0.857568	0.391199	0.700293	3043	t123 ~lib_size+read_conc_norm+run20201009_isala_cross_1+run20201016_isala_cross_2+run20201023_isala_cross_3+run20201030_isala_cross_4+run20201106_isala_cross_5+run20201120_isala_cross_6+run20201204_isala_cross_8+run20201211_isala_cross_9+run20210119_isala_cross_7+Q0.Leeftijd+Q1.Q29_8.Freq_Light_Beverages
Frequency of light beverages	Finegoldia	0.0736862	0.048358	1.52376	0.127672	0.402885	3043	t472 ~lib_size+read_conc_norm+run20201009_isala_cross_1+run20201016_isala_cross_2+run20201023_isala_cross_3+run20201030_isala_cross_4+run20201106_isala_cross_5+run20201120_isala_cross_6+run20201204_isala_cross_8+run20201211_isala_cross_9+run20210119_isala_cross_7+Q0.Leeftijd+Q1.Q29_8.Freq_Light_Beverages
Frequency of light beverages	Limosilactobacillus	-0.105575	0.0687212	-1.53628	0.124573	0.397083	3043	t433 ~lib_size+read_conc_norm+run20201009_isala_cross_1+run20201016_isala_cross_2+run20201023_isala_cross_3+run20201030_isala_cross_4+run20201106_isala_cross_5+run20201120_isala_cross_6+run20201204_isala_cross_8+run20201211_isala_cross_9+run20210119_isala_cross_7+Q0.Leeftijd+Q1.Q29_8.Freq_Light_Beverages
Frequency of light beverages	Clostridium	0.126682	0.0527213	2.40287	0.016327	0.12183	3043	t444 ~lib_size+read_conc_norm+run20201009_isala_cross_1+run20201016_isala_cross_2+run20201023_isala_cross_3+run20201030_isala_cross_4+run20201106_isala_cross_5+run20201120_isala_cross_6+run20201204_isala_cross_8+run20201211_isala_cross_9+run20210119_isala_cross_7+Q0.Leeftijd+Q1.Q29_8.Freq_Light_Beverages
Frequency of light beverages	Streptococcus	-0.0104921	0.0659473	-0.159098	0.873603	0.956666	3043	t11 ~lib_size+read_conc_norm+run20201009_isala_cross_1+run20201016_isala_cross_2+run20201023_isala_cross_3+run20201030_isala_cross_4+run20201106_isala_cross_5+run20201120_isala_cross_6+run20201204_isala_cross_8+run20201211_isala_cross_9+run20210119_isala_cross_7+Q0.Leeftijd+Q1.Q29_8.Freq_Light_Beverages
Frequency of light beverages	eigen_AV	0.231102	0.121667	1.89947	0.0575972	0.264157	3043	eigen_AV ~lib_size+read_conc_norm+run20201009_isala_cross_1+run20201016_isala_cross_2+run20201023_isala_cross_3+run20201030_isala_cross_4+run20201106_isala_cross_5+run20201120_isala_cross_6+run20201204_isala_cross_8+run20201211_isala_cross_9+run20210119_isala_cross_7+Q0.Leeftijd+Q1.Q29_8.Freq_Light_Beverages
Frequency of light beverages	eigen_BV	0.146082	0.111933	1.30508	0.191964	0.495986	3043	eigen_BV ~lib_size+read_conc_norm+run20201009_isala_cross_1+run20201016_isala_cross_2+run20201023_isala_cross_3+run20201030_isala_cross_4+run20201106_isala_cross_5+run20201120_isala_cross_6+run20201204_isala_cross_8+run20201211_isala_cross_9+run20210119_isala_cross_7+Q0.Leeftijd+Q1.Q29_8.Freq_Light_Beverages
Frequency of light beverages	eigen_Gut	0.0911549	0.0469618	1.94104	0.0523457	0.250384	3043	eigen_Gut ~lib_size+read_conc_norm+run20201009_isala_cross_1+run20201016_isala_cross_2+run20201023_isala_cross_3+run20201030_isala_cross_4+run20201106_isala_cross_5+run20201120_isala_cross_6+run20201204_isala_cross_8+run20201211_isala_cross_9+run20210119_isala_cross_7+Q0.Leeftijd+Q1.Q29_8.Freq_Light_Beverages
Frequency of light beverages	eigen_Lacto	-0.0257032	0.093517	-0.27485	0.78345	0.923551	3043	eigen_Lacto ~lib_size+read_conc_norm+run20201009_isala_cross_1+run20201016_isala_cross_2+run20201023_isala_cross_3+run20201030_isala_cross_4+run20201106_isala_cross_5+run20201120_isala_cross_6+run20201204_isala_cross_8+run20201211_isala_cross_9+run20210119_isala_cross_7+Q0.Leeftijd+Q1.Q29_8.Freq_Light_Beverages
Frequency of fruit	Lactobacillus crispatus group	0.100425	0.0762336	1.31733	0.187826	0.491903	3043	t34 ~lib_size+read_conc_norm+run20201009_isala_cross_1+run20201016_isala_cross_2+run20201023_isala_cross_3+run20201030_isala_cross_4+run20201106_isala_cross_5+run20201120_isala_cross_6+run20201204_isala_cross_8+run20201211_isala_cross_9+run20210119_isala_cross_7+Q0.Leeftijd+Q1.Q29_9.Freq_Fruit
Frequency of fruit	Lactobacillus iners group	0.11764	0.0897903	1.31016	0.190241	0.494106	3043	t22 ~lib_size+read_conc_norm+run20201009_isala_cross_1+run20201016_isala_cross_2+run20201023_isala_cross_3+run20201030_isala_cross_4+run20201106_isala_cross_5+run20201120_isala_cross_6+run20201204_isala_cross_8+run20201211_isala_cross_9+run20210119_isala_cross_7+Q0.Leeftijd+Q1.Q29_9.Freq_Fruit
Frequency of fruit	Gardnerella	0.0497787	0.0852435	0.583959	0.559291	0.81236	3043	t251 ~lib_size+read_conc_norm+run20201009_isala_cross_1+run20201016_isala_cross_2+run20201023_isala_cross_3+run20201030_isala_cross_4+run20201106_isala_cross_5+run20201120_isala_cross_6+run20201204_isala_cross_8+run20201211_isala_cross_9+run20210119_isala_cross_7+Q0.Leeftijd+Q1.Q29_9.Freq_Fruit
Frequency of fruit	Prevotella	-0.0664958	0.0587804	-1.13126	0.258037	0.579768	3043	t35 ~lib_size+read_conc_norm+run20201009_isala_cross_1+run20201016_isala_cross_2+run20201023_isala_cross_3+run20201030_isala_cross_4+run20201106_isala_cross_5+run20201120_isala_cross_6+run20201204_isala_cross_8+run20201211_isala_cross_9+run20210119_isala_cross_7+Q0.Leeftijd+Q1.Q29_9.Freq_Fruit
Frequency of fruit	Lactobacillus jensenii group	0.137847	0.0843799	1.63365	0.102437	0.35795	3043	t223 ~lib_size+read_conc_norm+run20201009_isala_cross_1+run20201016_isala_cross_2+run20201023_isala_cross_3+run20201030_isala_cross_4+run20201106_isala_cross_5+run20201120_isala_cross_6+run20201204_isala_cross_8+run20201211_isala_cross_9+run20210119_isala_cross_7+Q0.Leeftijd+Q1.Q29_9.Freq_Fruit
Frequency of fruit	Lactobacillus gasseri group	-0.0578122	0.070096	-0.824758	0.409574	0.712622	3043	t495 ~lib_size+read_conc_norm+run20201009_isala_cross_1+run20201016_isala_cross_2+run20201023_isala_cross_3+run20201030_isala_cross_4+run20201106_isala_cross_5+run20201120_isala_cross_6+run20201204_isala_cross_8+run20201211_isala_cross_9+run20210119_isala_cross_7+Q0.Leeftijd+Q1.Q29_9.Freq_Fruit
Frequency of fruit	Bifidobacterium	-0.119245	0.0506985	-2.35204	0.0187342	0.133337	3043	t272 ~lib_size+read_conc_norm+run20201009_isala_cross_1+run20201016_isala_cross_2+run20201023_isala_cross_3+run20201030_isala_cross_4+run20201106_isala_cross_5+run20201120_isala_cross_6+run20201204_isala_cross_8+run20201211_isala_cross_9+run20210119_isala_cross_7+Q0.Leeftijd+Q1.Q29_9.Freq_Fruit
Frequency of fruit	Anaerococcus	-0.156605	0.0561999	-2.78657	0.00536014	0.0575495	3043	t123 ~lib_size+read_conc_norm+run20201009_isala_cross_1+run20201016_isala_cross_2+run20201023_isala_cross_3+run20201030_isala_cross_4+run20201106_isala_cross_5+run20201120_isala_cross_6+run20201204_isala_cross_8+run20201211_isala_cross_9+run20210119_isala_cross_7+Q0.Leeftijd+Q1.Q29_9.Freq_Fruit
Frequency of fruit	Finegoldia	-0.0439158	0.0484382	-0.906637	0.364671	0.679259	3043	t472 ~lib_size+read_conc_norm+run20201009_isala_cross_1+run20201016_isala_cross_2+run20201023_isala_cross_3+run20201030_isala_cross_4+run20201106_isala_cross_5+run20201120_isala_cross_6+run20201204_isala_cross_8+run20201211_isala_cross_9+run20210119_isala_cross_7+Q0.Leeftijd+Q1.Q29_9.Freq_Fruit
Frequency of fruit	Limosilactobacillus	0.0875423	0.0688265	1.27193	0.203497	0.510268	3043	t433 ~lib_size+read_conc_norm+run20201009_isala_cross_1+run20201016_isala_cross_2+run20201023_isala_cross_3+run20201030_isala_cross_4+run20201106_isala_cross_5+run20201120_isala_cross_6+run20201204_isala_cross_8+run20201211_isala_cross_9+run20210119_isala_cross_7+Q0.Leeftijd+Q1.Q29_9.Freq_Fruit
Frequency of fruit	Clostridium	0.00351989	0.0528459	0.0666066	0.946899	0.984266	3043	t444 ~lib_size+read_conc_norm+run20201009_isala_cross_1+run20201016_isala_cross_2+run20201023_isala_cross_3+run20201030_isala_cross_4+run20201106_isala_cross_5+run20201120_isala_cross_6+run20201204_isala_cross_8+run20201211_isala_cross_9+run20210119_isala_cross_7+Q0.Leeftijd+Q1.Q29_9.Freq_Fruit
Frequency of fruit	Streptococcus	0.146387	0.065987	2.21842	0.0266003	0.16274	3043	t11 ~lib_size+read_conc_norm+run20201009_isala_cross_1+run20201016_isala_cross_2+run20201023_isala_cross_3+run20201030_isala_cross_4+run20201106_isala_cross_5+run20201120_isala_cross_6+run20201204_isala_cross_8+run20201211_isala_cross_9+run20210119_isala_cross_7+Q0.Leeftijd+Q1.Q29_9.Freq_Fruit
Frequency of fruit	eigen_AV	-0.315766	0.121776	-2.59302	0.0095595	0.0848444	3043	eigen_AV ~lib_size+read_conc_norm+run20201009_isala_cross_1+run20201016_isala_cross_2+run20201023_isala_cross_3+run20201030_isala_cross_4+run20201106_isala_cross_5+run20201120_isala_cross_6+run20201204_isala_cross_8+run20201211_isala_cross_9+run20210119_isala_cross_7+Q0.Leeftijd+Q1.Q29_9.Freq_Fruit
Frequency of fruit	eigen_BV	-0.00628516	0.112122	-0.0560563	0.955301	0.986863	3043	eigen_BV ~lib_size+read_conc_norm+run20201009_isala_cross_1+run20201016_isala_cross_2+run20201023_isala_cross_3+run20201030_isala_cross_4+run20201106_isala_cross_5+run20201120_isala_cross_6+run20201204_isala_cross_8+run20201211_isala_cross_9+run20210119_isala_cross_7+Q0.Leeftijd+Q1.Q29_9.Freq_Fruit
Frequency of fruit	eigen_Gut	-0.0870436	0.0470307	-1.85078	0.0642979	0.280133	3043	eigen_Gut ~lib_size+read_conc_norm+run20201009_isala_cross_1+run20201016_isala_cross_2+run20201023_isala_cross_3+run20201030_isala_cross_4+run20201106_isala_cross_5+run20201120_isala_cross_6+run20201204_isala_cross_8+run20201211_isala_cross_9+run20210119_isala_cross_7+Q0.Leeftijd+Q1.Q29_9.Freq_Fruit
Frequency of fruit	eigen_Lacto	0.191365	0.0935854	2.04482	0.0409588	0.217134	3043	eigen_Lacto ~lib_size+read_conc_norm+run20201009_isala_cross_1+run20201016_isala_cross_2+run20201023_isala_cross_3+run20201030_isala_cross_4+run20201106_isala_cross_5+run20201120_isala_cross_6+run20201204_isala_cross_8+run20201211_isala_cross_9+run20210119_isala_cross_7+Q0.Leeftijd+Q1.Q29_9.Freq_Fruit
Frequency vegetables	Lactobacillus crispatus group	0.0539306	0.0763731	0.706146	0.480152	0.762879	3043	t34 ~lib_size+read_conc_norm+run20201009_isala_cross_1+run20201016_isala_cross_2+run20201023_isala_cross_3+run20201030_isala_cross_4+run20201106_isala_cross_5+run20201120_isala_cross_6+run20201204_isala_cross_8+run20201211_isala_cross_9+run20210119_isala_cross_7+Q0.Leeftijd+Q1.Q29_10.Freq_Vegetables
Frequency vegetables	Lactobacillus iners group	0.154983	0.0899177	1.72361	0.0848808	0.322815	3043	t22 ~lib_size+read_conc_norm+run20201009_isala_cross_1+run20201016_isala_cross_2+run20201023_isala_cross_3+run20201030_isala_cross_4+run20201106_isala_cross_5+run20201120_isala_cross_6+run20201204_isala_cross_8+run20201211_isala_cross_9+run20210119_isala_cross_7+Q0.Leeftijd+Q1.Q29_10.Freq_Vegetables
Frequency vegetables	Gardnerella	0.0671617	0.0853781	0.786638	0.431555	0.729379	3043	t251 ~lib_size+read_conc_norm+run20201009_isala_cross_1+run20201016_isala_cross_2+run20201023_isala_cross_3+run20201030_isala_cross_4+run20201106_isala_cross_5+run20201120_isala_cross_6+run20201204_isala_cross_8+run20201211_isala_cross_9+run20210119_isala_cross_7+Q0.Leeftijd+Q1.Q29_10.Freq_Vegetables
Frequency vegetables	Prevotella	-0.136228	0.0588364	-2.31537	0.0206592	0.141839	3043	t35 ~lib_size+read_conc_norm+run20201009_isala_cross_1+run20201016_isala_cross_2+run20201023_isala_cross_3+run20201030_isala_cross_4+run20201106_isala_cross_5+run20201120_isala_cross_6+run20201204_isala_cross_8+run20201211_isala_cross_9+run20210119_isala_cross_7+Q0.Leeftijd+Q1.Q29_10.Freq_Vegetables
Frequency vegetables	Lactobacillus jensenii group	0.227074	0.0844536	2.68875	0.00721133	0.0692479	3043	t223 ~lib_size+read_conc_norm+run20201009_isala_cross_1+run20201016_isala_cross_2+run20201023_isala_cross_3+run20201030_isala_cross_4+run20201106_isala_cross_5+run20201120_isala_cross_6+run20201204_isala_cross_8+run20201211_isala_cross_9+run20210119_isala_cross_7+Q0.Leeftijd+Q1.Q29_10.Freq_Vegetables
Frequency vegetables	Lactobacillus gasseri group	-0.032775	0.0702153	-0.466778	0.640692	0.850657	3043	t495 ~lib_size+read_conc_norm+run20201009_isala_cross_1+run20201016_isala_cross_2+run20201023_isala_cross_3+run20201030_isala_cross_4+run20201106_isala_cross_5+run20201120_isala_cross_6+run20201204_isala_cross_8+run20201211_isala_cross_9+run20210119_isala_cross_7+Q0.Leeftijd+Q1.Q29_10.Freq_Vegetables
Frequency vegetables	Bifidobacterium	-0.13702	0.0507662	-2.69904	0.00699252	0.0680768	3043	t272 ~lib_size+read_conc_norm+run20201009_isala_cross_1+run20201016_isala_cross_2+run20201023_isala_cross_3+run20201030_isala_cross_4+run20201106_isala_cross_5+run20201120_isala_cross_6+run20201204_isala_cross_8+run20201211_isala_cross_9+run20210119_isala_cross_7+Q0.Leeftijd+Q1.Q29_10.Freq_Vegetables
Frequency vegetables	Anaerococcus	-0.140592	0.0563054	-2.49695	0.0125795	0.102031	3043	t123 ~lib_size+read_conc_norm+run20201009_isala_cross_1+run20201016_isala_cross_2+run20201023_isala_cross_3+run20201030_isala_cross_4+run20201106_isala_cross_5+run20201120_isala_cross_6+run20201204_isala_cross_8+run20201211_isala_cross_9+run20210119_isala_cross_7+Q0.Leeftijd+Q1.Q29_10.Freq_Vegetables
Frequency vegetables	Finegoldia	-0.0990147	0.0484901	-2.04196	0.0412423	0.217931	3043	t472 ~lib_size+read_conc_norm+run20201009_isala_cross_1+run20201016_isala_cross_2+run20201023_isala_cross_3+run20201030_isala_cross_4+run20201106_isala_cross_5+run20201120_isala_cross_6+run20201204_isala_cross_8+run20201211_isala_cross_9+run20210119_isala_cross_7+Q0.Leeftijd+Q1.Q29_10.Freq_Vegetables
Frequency vegetables	Limosilactobacillus	0.164125	0.0688923	2.38234	0.0172644	0.126277	3043	t433 ~lib_size+read_conc_norm+run20201009_isala_cross_1+run20201016_isala_cross_2+run20201023_isala_cross_3+run20201030_isala_cross_4+run20201106_isala_cross_5+run20201120_isala_cross_6+run20201204_isala_cross_8+run20201211_isala_cross_9+run20210119_isala_cross_7+Q0.Leeftijd+Q1.Q29_10.Freq_Vegetables
Frequency vegetables	Clostridium	-0.0996539	0.0529008	-1.88379	0.0596895	0.269557	3043	t444 ~lib_size+read_conc_norm+run20201009_isala_cross_1+run20201016_isala_cross_2+run20201023_isala_cross_3+run20201030_isala_cross_4+run20201106_isala_cross_5+run20201120_isala_cross_6+run20201204_isala_cross_8+run20201211_isala_cross_9+run20210119_isala_cross_7+Q0.Leeftijd+Q1.Q29_10.Freq_Vegetables
Frequency vegetables	Streptococcus	0.0200743	0.0661469	0.30348	0.761545	0.910874	3043	t11 ~lib_size+read_conc_norm+run20201009_isala_cross_1+run20201016_isala_cross_2+run20201023_isala_cross_3+run20201030_isala_cross_4+run20201106_isala_cross_5+run20201120_isala_cross_6+run20201204_isala_cross_8+run20201211_isala_cross_9+run20210119_isala_cross_7+Q0.Leeftijd+Q1.Q29_10.Freq_Vegetables
Frequency vegetables	eigen_AV	-0.4356	0.121852	-3.57482	0.000355935	0.00728955	3043	eigen_AV ~lib_size+read_conc_norm+run20201009_isala_cross_1+run20201016_isala_cross_2+run20201023_isala_cross_3+run20201030_isala_cross_4+run20201106_isala_cross_5+run20201120_isala_cross_6+run20201204_isala_cross_8+run20201211_isala_cross_9+run20210119_isala_cross_7+Q0.Leeftijd+Q1.Q29_10.Freq_Vegetables
Frequency vegetables	eigen_BV	-0.018963	0.112304	-0.168854	0.865923	0.953094	3043	eigen_BV ~lib_size+read_conc_norm+run20201009_isala_cross_1+run20201016_isala_cross_2+run20201023_isala_cross_3+run20201030_isala_cross_4+run20201106_isala_cross_5+run20201120_isala_cross_6+run20201204_isala_cross_8+run20201211_isala_cross_9+run20210119_isala_cross_7+Q0.Leeftijd+Q1.Q29_10.Freq_Vegetables
Frequency vegetables	eigen_Gut	0.0299768	0.0471306	0.636037	0.5248	0.792035	3043	eigen_Gut ~lib_size+read_conc_norm+run20201009_isala_cross_1+run20201016_isala_cross_2+run20201023_isala_cross_3+run20201030_isala_cross_4+run20201106_isala_cross_5+run20201120_isala_cross_6+run20201204_isala_cross_8+run20201211_isala_cross_9+run20210119_isala_cross_7+Q0.Leeftijd+Q1.Q29_10.Freq_Vegetables
Frequency vegetables	eigen_Lacto	0.270093	0.0936738	2.88334	0.00396256	0.0466398	3043	eigen_Lacto ~lib_size+read_conc_norm+run20201009_isala_cross_1+run20201016_isala_cross_2+run20201023_isala_cross_3+run20201030_isala_cross_4+run20201106_isala_cross_5+run20201120_isala_cross_6+run20201204_isala_cross_8+run20201211_isala_cross_9+run20210119_isala_cross_7+Q0.Leeftijd+Q1.Q29_10.Freq_Vegetables
Intake of probiotic dairy (last 24 hours)	Lactobacillus crispatus group	-0.256123	0.514936	-0.497389	0.618951	0.841288	{False: 2970, True: 68, nan: 5}	t34 ~lib_size+read_conc_norm+run20201009_isala_cross_1+run20201016_isala_cross_2+run20201023_isala_cross_3+run20201030_isala_cross_4+run20201106_isala_cross_5+run20201120_isala_cross_6+run20201204_isala_cross_8+run20201211_isala_cross_9+run20210119_isala_cross_7+Q0.Leeftijd+Q2.Q8_1.Intake_Probio_Dairy_24h
Intake of probiotic dairy (last 24 hours)	Lactobacillus iners group	-0.142906	0.606498	-0.235624	0.81374	0.933614	{False: 2970, True: 68, nan: 5}	t22 ~lib_size+read_conc_norm+run20201009_isala_cross_1+run20201016_isala_cross_2+run20201023_isala_cross_3+run20201030_isala_cross_4+run20201106_isala_cross_5+run20201120_isala_cross_6+run20201204_isala_cross_8+run20201211_isala_cross_9+run20210119_isala_cross_7+Q0.Leeftijd+Q2.Q8_1.Intake_Probio_Dairy_24h
Intake of probiotic dairy (last 24 hours)	Gardnerella	-0.716618	0.57558	-1.24504	0.213215	0.523264	{False: 2970, True: 68, nan: 5}	t251 ~lib_size+read_conc_norm+run20201009_isala_cross_1+run20201016_isala_cross_2+run20201023_isala_cross_3+run20201030_isala_cross_4+run20201106_isala_cross_5+run20201120_isala_cross_6+run20201204_isala_cross_8+run20201211_isala_cross_9+run20210119_isala_cross_7+Q0.Leeftijd+Q2.Q8_1.Intake_Probio_Dairy_24h
Intake of probiotic dairy (last 24 hours)	Prevotella	-1.00777	0.396414	-2.54222	0.0110647	0.0933518	{False: 2970, True: 68, nan: 5}	t35 ~lib_size+read_conc_norm+run20201009_isala_cross_1+run20201016_isala_cross_2+run20201023_isala_cross_3+run20201030_isala_cross_4+run20201106_isala_cross_5+run20201120_isala_cross_6+run20201204_isala_cross_8+run20201211_isala_cross_9+run20210119_isala_cross_7+Q0.Leeftijd+Q2.Q8_1.Intake_Probio_Dairy_24h
Intake of probiotic dairy (last 24 hours)	Lactobacillus jensenii group	-0.116212	0.570138	-0.203831	0.838499	0.941705	{False: 2970, True: 68, nan: 5}	t223 ~lib_size+read_conc_norm+run20201009_isala_cross_1+run20201016_isala_cross_2+run20201023_isala_cross_3+run20201030_isala_cross_4+run20201106_isala_cross_5+run20201120_isala_cross_6+run20201204_isala_cross_8+run20201211_isala_cross_9+run20210119_isala_cross_7+Q0.Leeftijd+Q2.Q8_1.Intake_Probio_Dairy_24h
Intake of probiotic dairy (last 24 hours)	Lactobacillus gasseri group	0.351448	0.473706	0.741913	0.458198	0.748019	{False: 2970, True: 68, nan: 5}	t495 ~lib_size+read_conc_norm+run20201009_isala_cross_1+run20201016_isala_cross_2+run20201023_isala_cross_3+run20201030_isala_cross_4+run20201106_isala_cross_5+run20201120_isala_cross_6+run20201204_isala_cross_8+run20201211_isala_cross_9+run20210119_isala_cross_7+Q0.Leeftijd+Q2.Q8_1.Intake_Probio_Dairy_24h
Intake of probiotic dairy (last 24 hours)	Bifidobacterium	-0.114553	0.34286	-0.334111	0.738319	0.899196	{False: 2970, True: 68, nan: 5}	t272 ~lib_size+read_conc_norm+run20201009_isala_cross_1+run20201016_isala_cross_2+run20201023_isala_cross_3+run20201030_isala_cross_4+run20201106_isala_cross_5+run20201120_isala_cross_6+run20201204_isala_cross_8+run20201211_isala_cross_9+run20210119_isala_cross_7+Q0.Leeftijd+Q2.Q8_1.Intake_Probio_Dairy_24h
Intake of probiotic dairy (last 24 hours)	Anaerococcus	-0.698457	0.379656	-1.83971	0.0659088	0.284019	{False: 2970, True: 68, nan: 5}	t123 ~lib_size+read_conc_norm+run20201009_isala_cross_1+run20201016_isala_cross_2+run20201023_isala_cross_3+run20201030_isala_cross_4+run20201106_isala_cross_5+run20201120_isala_cross_6+run20201204_isala_cross_8+run20201211_isala_cross_9+run20210119_isala_cross_7+Q0.Leeftijd+Q2.Q8_1.Intake_Probio_Dairy_24h
Intake of probiotic dairy (last 24 hours)	Finegoldia	-0.435474	0.327219	-1.33083	0.183345	0.485914	{False: 2970, True: 68, nan: 5}	t472 ~lib_size+read_conc_norm+run20201009_isala_cross_1+run20201016_isala_cross_2+run20201023_isala_cross_3+run20201030_isala_cross_4+run20201106_isala_cross_5+run20201120_isala_cross_6+run20201204_isala_cross_8+run20201211_isala_cross_9+run20210119_isala_cross_7+Q0.Leeftijd+Q2.Q8_1.Intake_Probio_Dairy_24h
Intake of probiotic dairy (last 24 hours)	Limosilactobacillus	0.139835	0.464997	0.300722	0.763647	0.911525	{False: 2970, True: 68, nan: 5}	t433 ~lib_size+read_conc_norm+run20201009_isala_cross_1+run20201016_isala_cross_2+run20201023_isala_cross_3+run20201030_isala_cross_4+run20201106_isala_cross_5+run20201120_isala_cross_6+run20201204_isala_cross_8+run20201211_isala_cross_9+run20210119_isala_cross_7+Q0.Leeftijd+Q2.Q8_1.Intake_Probio_Dairy_24h
Intake of probiotic dairy (last 24 hours)	Clostridium	-0.369146	0.356939	-1.0342	0.301126	0.626319	{False: 2970, True: 68, nan: 5}	t444 ~lib_size+read_conc_norm+run20201009_isala_cross_1+run20201016_isala_cross_2+run20201023_isala_cross_3+run20201030_isala_cross_4+run20201106_isala_cross_5+run20201120_isala_cross_6+run20201204_isala_cross_8+run20201211_isala_cross_9+run20210119_isala_cross_7+Q0.Leeftijd+Q2.Q8_1.Intake_Probio_Dairy_24h
Intake of probiotic dairy (last 24 hours)	Streptococcus	-0.527904	0.44604	-1.18353	0.23669	0.552885	{False: 2970, True: 68, nan: 5}	t11 ~lib_size+read_conc_norm+run20201009_isala_cross_1+run20201016_isala_cross_2+run20201023_isala_cross_3+run20201030_isala_cross_4+run20201106_isala_cross_5+run20201120_isala_cross_6+run20201204_isala_cross_8+run20201211_isala_cross_9+run20210119_isala_cross_7+Q0.Leeftijd+Q2.Q8_1.Intake_Probio_Dairy_24h
Intake of probiotic dairy (last 24 hours)	eigen_AV	-1.53724	0.823011	-1.86782	0.0618837	0.275667	{False: 2970, True: 68, nan: 5}	eigen_AV ~lib_size+read_conc_norm+run20201009_isala_cross_1+run20201016_isala_cross_2+run20201023_isala_cross_3+run20201030_isala_cross_4+run20201106_isala_cross_5+run20201120_isala_cross_6+run20201204_isala_cross_8+run20201211_isala_cross_9+run20210119_isala_cross_7+Q0.Leeftijd+Q2.Q8_1.Intake_Probio_Dairy_24h
Intake of probiotic dairy (last 24 hours)	eigen_BV	-1.00877	0.756668	-1.33317	0.182575	0.48531	{False: 2970, True: 68, nan: 5}	eigen_BV ~lib_size+read_conc_norm+run20201009_isala_cross_1+run20201016_isala_cross_2+run20201023_isala_cross_3+run20201030_isala_cross_4+run20201106_isala_cross_5+run20201120_isala_cross_6+run20201204_isala_cross_8+run20201211_isala_cross_9+run20210119_isala_cross_7+Q0.Leeftijd+Q2.Q8_1.Intake_Probio_Dairy_24h
Intake of probiotic dairy (last 24 hours)	eigen_Gut	0.849656	0.314202	2.70417	0.00688579	0.0674742	{False: 2970, True: 68, nan: 5}	eigen_Gut ~lib_size+read_conc_norm+run20201009_isala_cross_1+run20201016_isala_cross_2+run20201023_isala_cross_3+run20201030_isala_cross_4+run20201106_isala_cross_5+run20201120_isala_cross_6+run20201204_isala_cross_8+run20201211_isala_cross_9+run20210119_isala_cross_7+Q0.Leeftijd+Q2.Q8_1.Intake_Probio_Dairy_24h
Intake of probiotic dairy (last 24 hours)	eigen_Lacto	-0.137951	0.632219	-0.218201	0.827287	0.938468	{False: 2970, True: 68, nan: 5}	eigen_Lacto ~lib_size+read_conc_norm+run20201009_isala_cross_1+run20201016_isala_cross_2+run20201023_isala_cross_3+run20201030_isala_cross_4+run20201106_isala_cross_5+run20201120_isala_cross_6+run20201204_isala_cross_8+run20201211_isala_cross_9+run20210119_isala_cross_7+Q0.Leeftijd+Q2.Q8_1.Intake_Probio_Dairy_24h
Intake of probiotic yoghurt (last 24 hours)	Lactobacillus crispatus group	0.119089	0.235258	0.506207	0.612748	0.838282	{False: 2677, True: 361, nan: 5}	t34 ~lib_size+read_conc_norm+run20201009_isala_cross_1+run20201016_isala_cross_2+run20201023_isala_cross_3+run20201030_isala_cross_4+run20201106_isala_cross_5+run20201120_isala_cross_6+run20201204_isala_cross_8+run20201211_isala_cross_9+run20210119_isala_cross_7+Q0.Leeftijd+Q2.Q8_4.Intake_Probio_Yoghurt_24h
Intake of probiotic yoghurt (last 24 hours)	Lactobacillus iners group	-0.0335808	0.277092	-0.12119	0.903549	0.968112	{False: 2677, True: 361, nan: 5}	t22 ~lib_size+read_conc_norm+run20201009_isala_cross_1+run20201016_isala_cross_2+run20201023_isala_cross_3+run20201030_isala_cross_4+run20201106_isala_cross_5+run20201120_isala_cross_6+run20201204_isala_cross_8+run20201211_isala_cross_9+run20210119_isala_cross_7+Q0.Leeftijd+Q2.Q8_4.Intake_Probio_Yoghurt_24h
Intake of probiotic yoghurt (last 24 hours)	Gardnerella	-0.123255	0.263023	-0.46861	0.639382	0.85002	{False: 2677, True: 361, nan: 5}	t251 ~lib_size+read_conc_norm+run20201009_isala_cross_1+run20201016_isala_cross_2+run20201023_isala_cross_3+run20201030_isala_cross_4+run20201106_isala_cross_5+run20201120_isala_cross_6+run20201204_isala_cross_8+run20201211_isala_cross_9+run20210119_isala_cross_7+Q0.Leeftijd+Q2.Q8_4.Intake_Probio_Yoghurt_24h
Intake of probiotic yoghurt (last 24 hours)	Prevotella	0.0856667	0.181296	0.472523	0.636587	0.848921	{False: 2677, True: 361, nan: 5}	t35 ~lib_size+read_conc_norm+run20201009_isala_cross_1+run20201016_isala_cross_2+run20201023_isala_cross_3+run20201030_isala_cross_4+run20201106_isala_cross_5+run20201120_isala_cross_6+run20201204_isala_cross_8+run20201211_isala_cross_9+run20210119_isala_cross_7+Q0.Leeftijd+Q2.Q8_4.Intake_Probio_Yoghurt_24h
Intake of probiotic yoghurt (last 24 hours)	Lactobacillus jensenii group	0.0481017	0.260479	0.184666	0.853503	0.947661	{False: 2677, True: 361, nan: 5}	t223 ~lib_size+read_conc_norm+run20201009_isala_cross_1+run20201016_isala_cross_2+run20201023_isala_cross_3+run20201030_isala_cross_4+run20201106_isala_cross_5+run20201120_isala_cross_6+run20201204_isala_cross_8+run20201211_isala_cross_9+run20210119_isala_cross_7+Q0.Leeftijd+Q2.Q8_4.Intake_Probio_Yoghurt_24h
Intake of probiotic yoghurt (last 24 hours)	Lactobacillus gasseri group	-0.855986	0.215881	-3.96508	7.50702e-05	0.00207762	{False: 2677, True: 361, nan: 5}	t495 ~lib_size+read_conc_norm+run20201009_isala_cross_1+run20201016_isala_cross_2+run20201023_isala_cross_3+run20201030_isala_cross_4+run20201106_isala_cross_5+run20201120_isala_cross_6+run20201204_isala_cross_8+run20201211_isala_cross_9+run20210119_isala_cross_7+Q0.Leeftijd+Q2.Q8_4.Intake_Probio_Yoghurt_24h
Intake of probiotic yoghurt (last 24 hours)	Bifidobacterium	-0.279267	0.156563	-1.78374	0.0745667	0.302378	{False: 2677, True: 361, nan: 5}	t272 ~lib_size+read_conc_norm+run20201009_isala_cross_1+run20201016_isala_cross_2+run20201023_isala_cross_3+run20201030_isala_cross_4+run20201106_isala_cross_5+run20201120_isala_cross_6+run20201204_isala_cross_8+run20201211_isala_cross_9+run20210119_isala_cross_7+Q0.Leeftijd+Q2.Q8_4.Intake_Probio_Yoghurt_24h
Intake of probiotic yoghurt (last 24 hours)	Anaerococcus	-0.0181372	0.17355	-0.104507	0.916774	0.975226	{False: 2677, True: 361, nan: 5}	t123 ~lib_size+read_conc_norm+run20201009_isala_cross_1+run20201016_isala_cross_2+run20201023_isala_cross_3+run20201030_isala_cross_4+run20201106_isala_cross_5+run20201120_isala_cross_6+run20201204_isala_cross_8+run20201211_isala_cross_9+run20210119_isala_cross_7+Q0.Leeftijd+Q2.Q8_4.Intake_Probio_Yoghurt_24h
Intake of probiotic yoghurt (last 24 hours)	Finegoldia	0.0291215	0.149539	0.194742	0.845608	0.944278	{False: 2677, True: 361, nan: 5}	t472 ~lib_size+read_conc_norm+run20201009_isala_cross_1+run20201016_isala_cross_2+run20201023_isala_cross_3+run20201030_isala_cross_4+run20201106_isala_cross_5+run20201120_isala_cross_6+run20201204_isala_cross_8+run20201211_isala_cross_9+run20210119_isala_cross_7+Q0.Leeftijd+Q2.Q8_4.Intake_Probio_Yoghurt_24h
Intake of probiotic yoghurt (last 24 hours)	Limosilactobacillus	0.0444283	0.212444	0.209129	0.834362	0.94147	{False: 2677, True: 361, nan: 5}	t433 ~lib_size+read_conc_norm+run20201009_isala_cross_1+run20201016_isala_cross_2+run20201023_isala_cross_3+run20201030_isala_cross_4+run20201106_isala_cross_5+run20201120_isala_cross_6+run20201204_isala_cross_8+run20201211_isala_cross_9+run20210119_isala_cross_7+Q0.Leeftijd+Q2.Q8_4.Intake_Probio_Yoghurt_24h
Intake of probiotic yoghurt (last 24 hours)	Clostridium	0.000793038	0.163103	0.00486218	0.996121	0.9992	{False: 2677, True: 361, nan: 5}	t444 ~lib_size+read_conc_norm+run20201009_isala_cross_1+run20201016_isala_cross_2+run20201023_isala_cross_3+run20201030_isala_cross_4+run20201106_isala_cross_5+run20201120_isala_cross_6+run20201204_isala_cross_8+run20201211_isala_cross_9+run20210119_isala_cross_7+Q0.Leeftijd+Q2.Q8_4.Intake_Probio_Yoghurt_24h
Intake of probiotic yoghurt (last 24 hours)	Streptococcus	0.148322	0.203812	0.727743	0.466827	0.753101	{False: 2677, True: 361, nan: 5}	t11 ~lib_size+read_conc_norm+run20201009_isala_cross_1+run20201016_isala_cross_2+run20201023_isala_cross_3+run20201030_isala_cross_4+run20201106_isala_cross_5+run20201120_isala_cross_6+run20201204_isala_cross_8+run20201211_isala_cross_9+run20210119_isala_cross_7+Q0.Leeftijd+Q2.Q8_4.Intake_Probio_Yoghurt_24h
Intake of probiotic yoghurt (last 24 hours)	eigen_AV	-0.128331	0.376218	-0.341109	0.733045	0.896821	{False: 2677, True: 361, nan: 5}	eigen_AV ~lib_size+read_conc_norm+run20201009_isala_cross_1+run20201016_isala_cross_2+run20201023_isala_cross_3+run20201030_isala_cross_4+run20201106_isala_cross_5+run20201120_isala_cross_6+run20201204_isala_cross_8+run20201211_isala_cross_9+run20210119_isala_cross_7+Q0.Leeftijd+Q2.Q8_4.Intake_Probio_Yoghurt_24h
Intake of probiotic yoghurt (last 24 hours)	eigen_BV	0.158151	0.345788	0.457364	0.647442	0.855321	{False: 2677, True: 361, nan: 5}	eigen_BV ~lib_size+read_conc_norm+run20201009_isala_cross_1+run20201016_isala_cross_2+run20201023_isala_cross_3+run20201030_isala_cross_4+run20201106_isala_cross_5+run20201120_isala_cross_6+run20201204_isala_cross_8+run20201211_isala_cross_9+run20210119_isala_cross_7+Q0.Leeftijd+Q2.Q8_4.Intake_Probio_Yoghurt_24h
Intake of probiotic yoghurt (last 24 hours)	eigen_Gut	-0.120022	0.143706	-0.835195	0.403674	0.710244	{False: 2677, True: 361, nan: 5}	eigen_Gut ~lib_size+read_conc_norm+run20201009_isala_cross_1+run20201016_isala_cross_2+run20201023_isala_cross_3+run20201030_isala_cross_4+run20201106_isala_cross_5+run20201120_isala_cross_6+run20201204_isala_cross_8+run20201211_isala_cross_9+run20210119_isala_cross_7+Q0.Leeftijd+Q2.Q8_4.Intake_Probio_Yoghurt_24h
Intake of probiotic yoghurt (last 24 hours)	eigen_Lacto	0.115455	0.288836	0.399724	0.689388	0.877686	{False: 2677, True: 361, nan: 5}	eigen_Lacto ~lib_size+read_conc_norm+run20201009_isala_cross_1+run20201016_isala_cross_2+run20201023_isala_cross_3+run20201030_isala_cross_4+run20201106_isala_cross_5+run20201120_isala_cross_6+run20201204_isala_cross_8+run20201211_isala_cross_9+run20210119_isala_cross_7+Q0.Leeftijd+Q2.Q8_4.Intake_Probio_Yoghurt_24h
Intake of probiotic capsules (last 24 hours)	Lactobacillus crispatus group	0.168982	0.431432	0.391676	0.695325	0.880387	{False: 2940, True: 98, nan: 5}	t34 ~lib_size+read_conc_norm+run20201009_isala_cross_1+run20201016_isala_cross_2+run20201023_isala_cross_3+run20201030_isala_cross_4+run20201106_isala_cross_5+run20201120_isala_cross_6+run20201204_isala_cross_8+run20201211_isala_cross_9+run20210119_isala_cross_7+Q0.Leeftijd+Q2.Q8_5.Intake_Probio_Capsules_24h
Intake of probiotic capsules (last 24 hours)	Lactobacillus iners group	0.421641	0.508086	0.829861	0.406683	0.711109	{False: 2940, True: 98, nan: 5}	t22 ~lib_size+read_conc_norm+run20201009_isala_cross_1+run20201016_isala_cross_2+run20201023_isala_cross_3+run20201030_isala_cross_4+run20201106_isala_cross_5+run20201120_isala_cross_6+run20201204_isala_cross_8+run20201211_isala_cross_9+run20210119_isala_cross_7+Q0.Leeftijd+Q2.Q8_5.Intake_Probio_Capsules_24h
Intake of probiotic capsules (last 24 hours)	Gardnerella	-0.865573	0.482102	-1.79541	0.0726875	0.298514	{False: 2940, True: 98, nan: 5}	t251 ~lib_size+read_conc_norm+run20201009_isala_cross_1+run20201016_isala_cross_2+run20201023_isala_cross_3+run20201030_isala_cross_4+run20201106_isala_cross_5+run20201120_isala_cross_6+run20201204_isala_cross_8+run20201211_isala_cross_9+run20210119_isala_cross_7+Q0.Leeftijd+Q2.Q8_5.Intake_Probio_Capsules_24h
Intake of probiotic capsules (last 24 hours)	Prevotella	-0.510169	0.332351	-1.53503	0.124881	0.397599	{False: 2940, True: 98, nan: 5}	t35 ~lib_size+read_conc_norm+run20201009_isala_cross_1+run20201016_isala_cross_2+run20201023_isala_cross_3+run20201030_isala_cross_4+run20201106_isala_cross_5+run20201120_isala_cross_6+run20201204_isala_cross_8+run20201211_isala_cross_9+run20210119_isala_cross_7+Q0.Leeftijd+Q2.Q8_5.Intake_Probio_Capsules_24h
Intake of probiotic capsules (last 24 hours)	Lactobacillus jensenii group	-0.680939	0.477519	-1.426	0.153973	0.444106	{False: 2940, True: 98, nan: 5}	t223 ~lib_size+read_conc_norm+run20201009_isala_cross_1+run20201016_isala_cross_2+run20201023_isala_cross_3+run20201030_isala_cross_4+run20201106_isala_cross_5+run20201120_isala_cross_6+run20201204_isala_cross_8+run20201211_isala_cross_9+run20210119_isala_cross_7+Q0.Leeftijd+Q2.Q8_5.Intake_Probio_Capsules_24h
Intake of probiotic capsules (last 24 hours)	Lactobacillus gasseri group	0.0600946	0.396917	0.151404	0.879667	0.958608	{False: 2940, True: 98, nan: 5}	t495 ~lib_size+read_conc_norm+run20201009_isala_cross_1+run20201016_isala_cross_2+run20201023_isala_cross_3+run20201030_isala_cross_4+run20201106_isala_cross_5+run20201120_isala_cross_6+run20201204_isala_cross_8+run20201211_isala_cross_9+run20210119_isala_cross_7+Q0.Leeftijd+Q2.Q8_5.Intake_Probio_Capsules_24h
Intake of probiotic capsules (last 24 hours)	Bifidobacterium	0.265261	0.287221	0.923543	0.355798	0.671899	{False: 2940, True: 98, nan: 5}	t272 ~lib_size+read_conc_norm+run20201009_isala_cross_1+run20201016_isala_cross_2+run20201023_isala_cross_3+run20201030_isala_cross_4+run20201106_isala_cross_5+run20201120_isala_cross_6+run20201204_isala_cross_8+run20201211_isala_cross_9+run20210119_isala_cross_7+Q0.Leeftijd+Q2.Q8_5.Intake_Probio_Capsules_24h
Intake of probiotic capsules (last 24 hours)	Anaerococcus	-1.07494	0.317662	-3.38392	0.000723685	0.0126643	{False: 2940, True: 98, nan: 5}	t123 ~lib_size+read_conc_norm+run20201009_isala_cross_1+run20201016_isala_cross_2+run20201023_isala_cross_3+run20201030_isala_cross_4+run20201106_isala_cross_5+run20201120_isala_cross_6+run20201204_isala_cross_8+run20201211_isala_cross_9+run20210119_isala_cross_7+Q0.Leeftijd+Q2.Q8_5.Intake_Probio_Capsules_24h
Intake of probiotic capsules (last 24 hours)	Finegoldia	-0.636631	0.273988	-2.32357	0.0202144	0.139744	{False: 2940, True: 98, nan: 5}	t472 ~lib_size+read_conc_norm+run20201009_isala_cross_1+run20201016_isala_cross_2+run20201023_isala_cross_3+run20201030_isala_cross_4+run20201106_isala_cross_5+run20201120_isala_cross_6+run20201204_isala_cross_8+run20201211_isala_cross_9+run20210119_isala_cross_7+Q0.Leeftijd+Q2.Q8_5.Intake_Probio_Capsules_24h
Intake of probiotic capsules (last 24 hours)	Limosilactobacillus	0.256753	0.389564	0.659079	0.509895	0.782363	{False: 2940, True: 98, nan: 5}	t433 ~lib_size+read_conc_norm+run20201009_isala_cross_1+run20201016_isala_cross_2+run20201023_isala_cross_3+run20201030_isala_cross_4+run20201106_isala_cross_5+run20201120_isala_cross_6+run20201204_isala_cross_8+run20201211_isala_cross_9+run20210119_isala_cross_7+Q0.Leeftijd+Q2.Q8_5.Intake_Probio_Capsules_24h
Intake of probiotic capsules (last 24 hours)	Clostridium	0.243385	0.299072	0.813798	0.415825	0.715488	{False: 2940, True: 98, nan: 5}	t444 ~lib_size+read_conc_norm+run20201009_isala_cross_1+run20201016_isala_cross_2+run20201023_isala_cross_3+run20201030_isala_cross_4+run20201106_isala_cross_5+run20201120_isala_cross_6+run20201204_isala_cross_8+run20201211_isala_cross_9+run20210119_isala_cross_7+Q0.Leeftijd+Q2.Q8_5.Intake_Probio_Capsules_24h
Intake of probiotic capsules (last 24 hours)	Streptococcus	0.3381	0.373739	0.904641	0.365728	0.680764	{False: 2940, True: 98, nan: 5}	t11 ~lib_size+read_conc_norm+run20201009_isala_cross_1+run20201016_isala_cross_2+run20201023_isala_cross_3+run20201030_isala_cross_4+run20201106_isala_cross_5+run20201120_isala_cross_6+run20201204_isala_cross_8+run20201211_isala_cross_9+run20210119_isala_cross_7+Q0.Leeftijd+Q2.Q8_5.Intake_Probio_Capsules_24h
Intake of probiotic capsules (last 24 hours)	eigen_AV	-1.88243	0.689087	-2.73178	0.00633589	0.0638421	{False: 2940, True: 98, nan: 5}	eigen_AV ~lib_size+read_conc_norm+run20201009_isala_cross_1+run20201016_isala_cross_2+run20201023_isala_cross_3+run20201030_isala_cross_4+run20201106_isala_cross_5+run20201120_isala_cross_6+run20201204_isala_cross_8+run20201211_isala_cross_9+run20210119_isala_cross_7+Q0.Leeftijd+Q2.Q8_5.Intake_Probio_Capsules_24h
Intake of probiotic capsules (last 24 hours)	eigen_BV	-1.37337	0.633649	-2.1674	0.030282	0.178692	{False: 2940, True: 98, nan: 5}	eigen_BV ~lib_size+read_conc_norm+run20201009_isala_cross_1+run20201016_isala_cross_2+run20201023_isala_cross_3+run20201030_isala_cross_4+run20201106_isala_cross_5+run20201120_isala_cross_6+run20201204_isala_cross_8+run20201211_isala_cross_9+run20210119_isala_cross_7+Q0.Leeftijd+Q2.Q8_5.Intake_Probio_Capsules_24h
Intake of probiotic capsules (last 24 hours)	eigen_Gut	0.0130694	0.263564	0.0495872	0.960455	0.98845	{False: 2940, True: 98, nan: 5}	eigen_Gut ~lib_size+read_conc_norm+run20201009_isala_cross_1+run20201016_isala_cross_2+run20201023_isala_cross_3+run20201030_isala_cross_4+run20201106_isala_cross_5+run20201120_isala_cross_6+run20201204_isala_cross_8+run20201211_isala_cross_9+run20210119_isala_cross_7+Q0.Leeftijd+Q2.Q8_5.Intake_Probio_Capsules_24h
Intake of probiotic capsules (last 24 hours)	eigen_Lacto	-0.266349	0.529671	-0.502857	0.615101	0.839293	{False: 2940, True: 98, nan: 5}	eigen_Lacto ~lib_size+read_conc_norm+run20201009_isala_cross_1+run20201016_isala_cross_2+run20201023_isala_cross_3+run20201030_isala_cross_4+run20201106_isala_cross_5+run20201120_isala_cross_6+run20201204_isala_cross_8+run20201211_isala_cross_9+run20210119_isala_cross_7+Q0.Leeftijd+Q2.Q8_5.Intake_Probio_Capsules_24h
No intake of probiotics (last 24 hours)	Lactobacillus crispatus group	-0.100916	0.206922	-0.487702	0.625796	0.843278	{True: 2548, False: 491, nan: 4}	t34 ~lib_size+read_conc_norm+run20201009_isala_cross_1+run20201016_isala_cross_2+run20201023_isala_cross_3+run20201030_isala_cross_4+run20201106_isala_cross_5+run20201120_isala_cross_6+run20201204_isala_cross_8+run20201211_isala_cross_9+run20210119_isala_cross_7+Q0.Leeftijd+Q2.Q8_6.No_Intake_Probio
No intake of probiotics (last 24 hours)	Lactobacillus iners group	0.0433141	0.243716	0.177723	0.858952	0.949589	{True: 2548, False: 491, nan: 4}	t22 ~lib_size+read_conc_norm+run20201009_isala_cross_1+run20201016_isala_cross_2+run20201023_isala_cross_3+run20201030_isala_cross_4+run20201106_isala_cross_5+run20201120_isala_cross_6+run20201204_isala_cross_8+run20201211_isala_cross_9+run20210119_isala_cross_7+Q0.Leeftijd+Q2.Q8_6.No_Intake_Probio
No intake of probiotics (last 24 hours)	Gardnerella	0.408273	0.231291	1.7652	0.0776316	0.307976	{True: 2548, False: 491, nan: 4}	t251 ~lib_size+read_conc_norm+run20201009_isala_cross_1+run20201016_isala_cross_2+run20201023_isala_cross_3+run20201030_isala_cross_4+run20201106_isala_cross_5+run20201120_isala_cross_6+run20201204_isala_cross_8+run20201211_isala_cross_9+run20210119_isala_cross_7+Q0.Leeftijd+Q2.Q8_6.No_Intake_Probio
No intake of probiotics (last 24 hours)	Prevotella	0.128039	0.159447	0.803018	0.422027	0.721876	{True: 2548, False: 491, nan: 4}	t35 ~lib_size+read_conc_norm+run20201009_isala_cross_1+run20201016_isala_cross_2+run20201023_isala_cross_3+run20201030_isala_cross_4+run20201106_isala_cross_5+run20201120_isala_cross_6+run20201204_isala_cross_8+run20201211_isala_cross_9+run20210119_isala_cross_7+Q0.Leeftijd+Q2.Q8_6.No_Intake_Probio
No intake of probiotics (last 24 hours)	Lactobacillus jensenii group	0.234785	0.229135	1.02466	0.305606	0.62871	{True: 2548, False: 491, nan: 4}	t223 ~lib_size+read_conc_norm+run20201009_isala_cross_1+run20201016_isala_cross_2+run20201023_isala_cross_3+run20201030_isala_cross_4+run20201106_isala_cross_5+run20201120_isala_cross_6+run20201204_isala_cross_8+run20201211_isala_cross_9+run20210119_isala_cross_7+Q0.Leeftijd+Q2.Q8_6.No_Intake_Probio
No intake of probiotics (last 24 hours)	Lactobacillus gasseri group	0.552679	0.190096	2.90737	0.00367136	0.0441642	{True: 2548, False: 491, nan: 4}	t495 ~lib_size+read_conc_norm+run20201009_isala_cross_1+run20201016_isala_cross_2+run20201023_isala_cross_3+run20201030_isala_cross_4+run20201106_isala_cross_5+run20201120_isala_cross_6+run20201204_isala_cross_8+run20201211_isala_cross_9+run20210119_isala_cross_7+Q0.Leeftijd+Q2.Q8_6.No_Intake_Probio
No intake of probiotics (last 24 hours)	Bifidobacterium	0.0931438	0.137757	0.676146	0.499	0.775822	{True: 2548, False: 491, nan: 4}	t272 ~lib_size+read_conc_norm+run20201009_isala_cross_1+run20201016_isala_cross_2+run20201023_isala_cross_3+run20201030_isala_cross_4+run20201106_isala_cross_5+run20201120_isala_cross_6+run20201204_isala_cross_8+run20201211_isala_cross_9+run20210119_isala_cross_7+Q0.Leeftijd+Q2.Q8_6.No_Intake_Probio
No intake of probiotics (last 24 hours)	Anaerococcus	0.264746	0.152559	1.73537	0.0827776	0.318927	{True: 2548, False: 491, nan: 4}	t123 ~lib_size+read_conc_norm+run20201009_isala_cross_1+run20201016_isala_cross_2+run20201023_isala_cross_3+run20201030_isala_cross_4+run20201106_isala_cross_5+run20201120_isala_cross_6+run20201204_isala_cross_8+run20201211_isala_cross_9+run20210119_isala_cross_7+Q0.Leeftijd+Q2.Q8_6.No_Intake_Probio
No intake of probiotics (last 24 hours)	Finegoldia	0.13056	0.13151	0.992771	0.320901	0.641448	{True: 2548, False: 491, nan: 4}	t472 ~lib_size+read_conc_norm+run20201009_isala_cross_1+run20201016_isala_cross_2+run20201023_isala_cross_3+run20201030_isala_cross_4+run20201106_isala_cross_5+run20201120_isala_cross_6+run20201204_isala_cross_8+run20201211_isala_cross_9+run20210119_isala_cross_7+Q0.Leeftijd+Q2.Q8_6.No_Intake_Probio
No intake of probiotics (last 24 hours)	Limosilactobacillus	-0.0646947	0.186871	-0.3462	0.729217	0.895806	{True: 2548, False: 491, nan: 4}	t433 ~lib_size+read_conc_norm+run20201009_isala_cross_1+run20201016_isala_cross_2+run20201023_isala_cross_3+run20201030_isala_cross_4+run20201106_isala_cross_5+run20201120_isala_cross_6+run20201204_isala_cross_8+run20201211_isala_cross_9+run20210119_isala_cross_7+Q0.Leeftijd+Q2.Q8_6.No_Intake_Probio
No intake of probiotics (last 24 hours)	Clostridium	-0.0296231	0.143448	-0.206507	0.836409	0.941525	{True: 2548, False: 491, nan: 4}	t444 ~lib_size+read_conc_norm+run20201009_isala_cross_1+run20201016_isala_cross_2+run20201023_isala_cross_3+run20201030_isala_cross_4+run20201106_isala_cross_5+run20201120_isala_cross_6+run20201204_isala_cross_8+run20201211_isala_cross_9+run20210119_isala_cross_7+Q0.Leeftijd+Q2.Q8_6.No_Intake_Probio
No intake of probiotics (last 24 hours)	Streptococcus	-0.154288	0.179248	-0.860751	0.389443	0.698865	{True: 2548, False: 491, nan: 4}	t11 ~lib_size+read_conc_norm+run20201009_isala_cross_1+run20201016_isala_cross_2+run20201023_isala_cross_3+run20201030_isala_cross_4+run20201106_isala_cross_5+run20201120_isala_cross_6+run20201204_isala_cross_8+run20201211_isala_cross_9+run20210119_isala_cross_7+Q0.Leeftijd+Q2.Q8_6.No_Intake_Probio
No intake of probiotics (last 24 hours)	eigen_AV	0.551626	0.330736	1.66788	0.0954438	0.343582	{True: 2548, False: 491, nan: 4}	eigen_AV ~lib_size+read_conc_norm+run20201009_isala_cross_1+run20201016_isala_cross_2+run20201023_isala_cross_3+run20201030_isala_cross_4+run20201106_isala_cross_5+run20201120_isala_cross_6+run20201204_isala_cross_8+run20201211_isala_cross_9+run20210119_isala_cross_7+Q0.Leeftijd+Q2.Q8_6.No_Intake_Probio
No intake of probiotics (last 24 hours)	eigen_BV	0.295952	0.304173	0.972973	0.330645	0.648948	{True: 2548, False: 491, nan: 4}	eigen_BV ~lib_size+read_conc_norm+run20201009_isala_cross_1+run20201016_isala_cross_2+run20201023_isala_cross_3+run20201030_isala_cross_4+run20201106_isala_cross_5+run20201120_isala_cross_6+run20201204_isala_cross_8+run20201211_isala_cross_9+run20210119_isala_cross_7+Q0.Leeftijd+Q2.Q8_6.No_Intake_Probio
No intake of probiotics (last 24 hours)	eigen_Gut	-0.0320899	0.1264	-0.253875	0.79961	0.929795	{True: 2548, False: 491, nan: 4}	eigen_Gut ~lib_size+read_conc_norm+run20201009_isala_cross_1+run20201016_isala_cross_2+run20201023_isala_cross_3+run20201030_isala_cross_4+run20201106_isala_cross_5+run20201120_isala_cross_6+run20201204_isala_cross_8+run20201211_isala_cross_9+run20210119_isala_cross_7+Q0.Leeftijd+Q2.Q8_6.No_Intake_Probio
No intake of probiotics (last 24 hours)	eigen_Lacto	0.0827891	0.25406	0.325864	0.744549	0.902765	{True: 2548, False: 491, nan: 4}	eigen_Lacto ~lib_size+read_conc_norm+run20201009_isala_cross_1+run20201016_isala_cross_2+run20201023_isala_cross_3+run20201030_isala_cross_4+run20201106_isala_cross_5+run20201120_isala_cross_6+run20201204_isala_cross_8+run20201211_isala_cross_9+run20210119_isala_cross_7+Q0.Leeftijd+Q2.Q8_6.No_Intake_Probio
Portions of dairy (last 24 hours)	Lactobacillus crispatus group	0.11129	0.076123	1.46197	0.143853	0.4302	3038	t34 ~lib_size+read_conc_norm+run20201009_isala_cross_1+run20201016_isala_cross_2+run20201023_isala_cross_3+run20201030_isala_cross_4+run20201106_isala_cross_5+run20201120_isala_cross_6+run20201204_isala_cross_8+run20201211_isala_cross_9+run20210119_isala_cross_7+Q0.Leeftijd+Q2.Q10_1.Portion_24h_Dairy
Portions of dairy (last 24 hours)	Lactobacillus iners group	-0.0515439	0.0896826	-0.574736	0.565512	0.814608	3038	t22 ~lib_size+read_conc_norm+run20201009_isala_cross_1+run20201016_isala_cross_2+run20201023_isala_cross_3+run20201030_isala_cross_4+run20201106_isala_cross_5+run20201120_isala_cross_6+run20201204_isala_cross_8+run20201211_isala_cross_9+run20210119_isala_cross_7+Q0.Leeftijd+Q2.Q10_1.Portion_24h_Dairy
Portions of dairy (last 24 hours)	Gardnerella	0.0271753	0.085135	0.319202	0.749595	0.905994	3038	t251 ~lib_size+read_conc_norm+run20201009_isala_cross_1+run20201016_isala_cross_2+run20201023_isala_cross_3+run20201030_isala_cross_4+run20201106_isala_cross_5+run20201120_isala_cross_6+run20201204_isala_cross_8+run20201211_isala_cross_9+run20210119_isala_cross_7+Q0.Leeftijd+Q2.Q10_1.Portion_24h_Dairy
Portions of dairy (last 24 hours)	Prevotella	-0.0237677	0.0586813	-0.40503	0.685484	0.876596	3038	t35 ~lib_size+read_conc_norm+run20201009_isala_cross_1+run20201016_isala_cross_2+run20201023_isala_cross_3+run20201030_isala_cross_4+run20201106_isala_cross_5+run20201120_isala_cross_6+run20201204_isala_cross_8+run20201211_isala_cross_9+run20210119_isala_cross_7+Q0.Leeftijd+Q2.Q10_1.Portion_24h_Dairy
Portions of dairy (last 24 hours)	Lactobacillus jensenii group	0.0190252	0.0843098	0.225658	0.821483	0.936854	3038	t223 ~lib_size+read_conc_norm+run20201009_isala_cross_1+run20201016_isala_cross_2+run20201023_isala_cross_3+run20201030_isala_cross_4+run20201106_isala_cross_5+run20201120_isala_cross_6+run20201204_isala_cross_8+run20201211_isala_cross_9+run20210119_isala_cross_7+Q0.Leeftijd+Q2.Q10_1.Portion_24h_Dairy
Portions of dairy (last 24 hours)	Lactobacillus gasseri group	-0.0340448	0.0700535	-0.485982	0.627015	0.843492	3038	t495 ~lib_size+read_conc_norm+run20201009_isala_cross_1+run20201016_isala_cross_2+run20201023_isala_cross_3+run20201030_isala_cross_4+run20201106_isala_cross_5+run20201120_isala_cross_6+run20201204_isala_cross_8+run20201211_isala_cross_9+run20210119_isala_cross_7+Q0.Leeftijd+Q2.Q10_1.Portion_24h_Dairy
Portions of dairy (last 24 hours)	Bifidobacterium	-0.0297788	0.0506989	-0.587366	0.557002	0.811449	3038	t272 ~lib_size+read_conc_norm+run20201009_isala_cross_1+run20201016_isala_cross_2+run20201023_isala_cross_3+run20201030_isala_cross_4+run20201106_isala_cross_5+run20201120_isala_cross_6+run20201204_isala_cross_8+run20201211_isala_cross_9+run20210119_isala_cross_7+Q0.Leeftijd+Q2.Q10_1.Portion_24h_Dairy
Portions of dairy (last 24 hours)	Anaerococcus	-0.0288149	0.0561711	-0.512985	0.607999	0.837642	3038	t123 ~lib_size+read_conc_norm+run20201009_isala_cross_1+run20201016_isala_cross_2+run20201023_isala_cross_3+run20201030_isala_cross_4+run20201106_isala_cross_5+run20201120_isala_cross_6+run20201204_isala_cross_8+run20201211_isala_cross_9+run20210119_isala_cross_7+Q0.Leeftijd+Q2.Q10_1.Portion_24h_Dairy
Portions of dairy (last 24 hours)	Finegoldia	0.0245051	0.0484	0.506303	0.612681	0.838282	3038	t472 ~lib_size+read_conc_norm+run20201009_isala_cross_1+run20201016_isala_cross_2+run20201023_isala_cross_3+run20201030_isala_cross_4+run20201106_isala_cross_5+run20201120_isala_cross_6+run20201204_isala_cross_8+run20201211_isala_cross_9+run20210119_isala_cross_7+Q0.Leeftijd+Q2.Q10_1.Portion_24h_Dairy
Portions of dairy (last 24 hours)	Limosilactobacillus	-0.0430911	0.0687586	-0.626702	0.530902	0.794557	3038	t433 ~lib_size+read_conc_norm+run20201009_isala_cross_1+run20201016_isala_cross_2+run20201023_isala_cross_3+run20201030_isala_cross_4+run20201106_isala_cross_5+run20201120_isala_cross_6+run20201204_isala_cross_8+run20201211_isala_cross_9+run20210119_isala_cross_7+Q0.Leeftijd+Q2.Q10_1.Portion_24h_Dairy
Portions of dairy (last 24 hours)	Clostridium	-0.0521801	0.0527836	-0.988565	0.322955	0.642303	3038	t444 ~lib_size+read_conc_norm+run20201009_isala_cross_1+run20201016_isala_cross_2+run20201023_isala_cross_3+run20201030_isala_cross_4+run20201106_isala_cross_5+run20201120_isala_cross_6+run20201204_isala_cross_8+run20201211_isala_cross_9+run20210119_isala_cross_7+Q0.Leeftijd+Q2.Q10_1.Portion_24h_Dairy
Portions of dairy (last 24 hours)	Streptococcus	0.00400763	0.065974	0.0607456	0.951566	0.985818	3038	t11 ~lib_size+read_conc_norm+run20201009_isala_cross_1+run20201016_isala_cross_2+run20201023_isala_cross_3+run20201030_isala_cross_4+run20201106_isala_cross_5+run20201120_isala_cross_6+run20201204_isala_cross_8+run20201211_isala_cross_9+run20210119_isala_cross_7+Q0.Leeftijd+Q2.Q10_1.Portion_24h_Dairy
Portions of dairy (last 24 hours)	eigen_AV	0.11341	0.121757	0.931452	0.351694	0.668741	3038	eigen_AV ~lib_size+read_conc_norm+run20201009_isala_cross_1+run20201016_isala_cross_2+run20201023_isala_cross_3+run20201030_isala_cross_4+run20201106_isala_cross_5+run20201120_isala_cross_6+run20201204_isala_cross_8+run20201211_isala_cross_9+run20210119_isala_cross_7+Q0.Leeftijd+Q2.Q10_1.Portion_24h_Dairy
Portions of dairy (last 24 hours)	eigen_BV	-0.0830468	0.111916	-0.742047	0.458117	0.748019	3038	eigen_BV ~lib_size+read_conc_norm+run20201009_isala_cross_1+run20201016_isala_cross_2+run20201023_isala_cross_3+run20201030_isala_cross_4+run20201106_isala_cross_5+run20201120_isala_cross_6+run20201204_isala_cross_8+run20201211_isala_cross_9+run20210119_isala_cross_7+Q0.Leeftijd+Q2.Q10_1.Portion_24h_Dairy
Portions of dairy (last 24 hours)	eigen_Gut	-0.0216284	0.0465174	-0.464952	0.642	0.851564	3038	eigen_Gut ~lib_size+read_conc_norm+run20201009_isala_cross_1+run20201016_isala_cross_2+run20201023_isala_cross_3+run20201030_isala_cross_4+run20201106_isala_cross_5+run20201120_isala_cross_6+run20201204_isala_cross_8+run20201211_isala_cross_9+run20210119_isala_cross_7+Q0.Leeftijd+Q2.Q10_1.Portion_24h_Dairy
Portions of dairy (last 24 hours)	eigen_Lacto	0.0467054	0.0934871	0.499592	0.617399	0.840155	3038	eigen_Lacto ~lib_size+read_conc_norm+run20201009_isala_cross_1+run20201016_isala_cross_2+run20201023_isala_cross_3+run20201030_isala_cross_4+run20201106_isala_cross_5+run20201120_isala_cross_6+run20201204_isala_cross_8+run20201211_isala_cross_9+run20210119_isala_cross_7+Q0.Leeftijd+Q2.Q10_1.Portion_24h_Dairy
Portions of fermented foods (last 24 hours)	Lactobacillus crispatus group	0.0276686	0.0762475	0.362879	0.716721	0.890757	3038	t34 ~lib_size+read_conc_norm+run20201009_isala_cross_1+run20201016_isala_cross_2+run20201023_isala_cross_3+run20201030_isala_cross_4+run20201106_isala_cross_5+run20201120_isala_cross_6+run20201204_isala_cross_8+run20201211_isala_cross_9+run20210119_isala_cross_7+Q0.Leeftijd+Q2.Q10_2.Portion_24h_Fermented_Food
Portions of fermented foods (last 24 hours)	Lactobacillus iners group	0.107151	0.0897834	1.19344	0.232791	0.548629	3038	t22 ~lib_size+read_conc_norm+run20201009_isala_cross_1+run20201016_isala_cross_2+run20201023_isala_cross_3+run20201030_isala_cross_4+run20201106_isala_cross_5+run20201120_isala_cross_6+run20201204_isala_cross_8+run20201211_isala_cross_9+run20210119_isala_cross_7+Q0.Leeftijd+Q2.Q10_2.Portion_24h_Fermented_Food
Portions of fermented foods (last 24 hours)	Gardnerella	0.00517027	0.0852475	0.0606501	0.951642	0.985818	3038	t251 ~lib_size+read_conc_norm+run20201009_isala_cross_1+run20201016_isala_cross_2+run20201023_isala_cross_3+run20201030_isala_cross_4+run20201106_isala_cross_5+run20201120_isala_cross_6+run20201204_isala_cross_8+run20201211_isala_cross_9+run20210119_isala_cross_7+Q0.Leeftijd+Q2.Q10_2.Portion_24h_Fermented_Food
Portions of fermented foods (last 24 hours)	Prevotella	-0.0175305	0.0587586	-0.298349	0.765458	0.912755	3038	t35 ~lib_size+read_conc_norm+run20201009_isala_cross_1+run20201016_isala_cross_2+run20201023_isala_cross_3+run20201030_isala_cross_4+run20201106_isala_cross_5+run20201120_isala_cross_6+run20201204_isala_cross_8+run20201211_isala_cross_9+run20210119_isala_cross_7+Q0.Leeftijd+Q2.Q10_2.Portion_24h_Fermented_Food
Portions of fermented foods (last 24 hours)	Lactobacillus jensenii group	0.0846792	0.0844065	1.00323	0.31583	0.638676	3038	t223 ~lib_size+read_conc_norm+run20201009_isala_cross_1+run20201016_isala_cross_2+run20201023_isala_cross_3+run20201030_isala_cross_4+run20201106_isala_cross_5+run20201120_isala_cross_6+run20201204_isala_cross_8+run20201211_isala_cross_9+run20210119_isala_cross_7+Q0.Leeftijd+Q2.Q10_2.Portion_24h_Fermented_Food
Portions of fermented foods (last 24 hours)	Lactobacillus gasseri group	-0.0185837	0.0701468	-0.264926	0.791085	0.926779	3038	t495 ~lib_size+read_conc_norm+run20201009_isala_cross_1+run20201016_isala_cross_2+run20201023_isala_cross_3+run20201030_isala_cross_4+run20201106_isala_cross_5+run20201120_isala_cross_6+run20201204_isala_cross_8+run20201211_isala_cross_9+run20210119_isala_cross_7+Q0.Leeftijd+Q2.Q10_2.Portion_24h_Fermented_Food
Portions of fermented foods (last 24 hours)	Bifidobacterium	-0.0291411	0.0507651	-0.574038	0.565985	0.814716	3038	t272 ~lib_size+read_conc_norm+run20201009_isala_cross_1+run20201016_isala_cross_2+run20201023_isala_cross_3+run20201030_isala_cross_4+run20201106_isala_cross_5+run20201120_isala_cross_6+run20201204_isala_cross_8+run20201211_isala_cross_9+run20210119_isala_cross_7+Q0.Leeftijd+Q2.Q10_2.Portion_24h_Fermented_Food
Portions of fermented foods (last 24 hours)	Anaerococcus	-0.0332269	0.0562436	-0.590768	0.55472	0.809597	3038	t123 ~lib_size+read_conc_norm+run20201009_isala_cross_1+run20201016_isala_cross_2+run20201023_isala_cross_3+run20201030_isala_cross_4+run20201106_isala_cross_5+run20201120_isala_cross_6+run20201204_isala_cross_8+run20201211_isala_cross_9+run20210119_isala_cross_7+Q0.Leeftijd+Q2.Q10_2.Portion_24h_Fermented_Food
Portions of fermented foods (last 24 hours)	Finegoldia	-0.0585127	0.0484536	-1.2076	0.227294	0.541908	3038	t472 ~lib_size+read_conc_norm+run20201009_isala_cross_1+run20201016_isala_cross_2+run20201023_isala_cross_3+run20201030_isala_cross_4+run20201106_isala_cross_5+run20201120_isala_cross_6+run20201204_isala_cross_8+run20201211_isala_cross_9+run20210119_isala_cross_7+Q0.Leeftijd+Q2.Q10_2.Portion_24h_Fermented_Food
Portions of fermented foods (last 24 hours)	Limosilactobacillus	-0.000172864	0.0688528	-0.00251063	0.997997	0.999475	3038	t433 ~lib_size+read_conc_norm+run20201009_isala_cross_1+run20201016_isala_cross_2+run20201023_isala_cross_3+run20201030_isala_cross_4+run20201106_isala_cross_5+run20201120_isala_cross_6+run20201204_isala_cross_8+run20201211_isala_cross_9+run20210119_isala_cross_7+Q0.Leeftijd+Q2.Q10_2.Portion_24h_Fermented_Food
Portions of fermented foods (last 24 hours)	Clostridium	-0.000467362	0.052861	-0.00884133	0.992946	0.998717	3038	t444 ~lib_size+read_conc_norm+run20201009_isala_cross_1+run20201016_isala_cross_2+run20201023_isala_cross_3+run20201030_isala_cross_4+run20201106_isala_cross_5+run20201120_isala_cross_6+run20201204_isala_cross_8+run20201211_isala_cross_9+run20210119_isala_cross_7+Q0.Leeftijd+Q2.Q10_2.Portion_24h_Fermented_Food
Portions of fermented foods (last 24 hours)	Streptococcus	0.0463209	0.0660548	0.70125	0.483201	0.766093	3038	t11 ~lib_size+read_conc_norm+run20201009_isala_cross_1+run20201016_isala_cross_2+run20201023_isala_cross_3+run20201030_isala_cross_4+run20201106_isala_cross_5+run20201120_isala_cross_6+run20201204_isala_cross_8+run20201211_isala_cross_9+run20210119_isala_cross_7+Q0.Leeftijd+Q2.Q10_2.Portion_24h_Fermented_Food
Portions of fermented foods (last 24 hours)	eigen_AV	-0.171716	0.121893	-1.40875	0.159013	0.451634	3038	eigen_AV ~lib_size+read_conc_norm+run20201009_isala_cross_1+run20201016_isala_cross_2+run20201023_isala_cross_3+run20201030_isala_cross_4+run20201106_isala_cross_5+run20201120_isala_cross_6+run20201204_isala_cross_8+run20201211_isala_cross_9+run20210119_isala_cross_7+Q0.Leeftijd+Q2.Q10_2.Portion_24h_Fermented_Food
Portions of fermented foods (last 24 hours)	eigen_BV	0.0565241	0.112067	0.504376	0.614034	0.83897	3038	eigen_BV ~lib_size+read_conc_norm+run20201009_isala_cross_1+run20201016_isala_cross_2+run20201023_isala_cross_3+run20201030_isala_cross_4+run20201106_isala_cross_5+run20201120_isala_cross_6+run20201204_isala_cross_8+run20201211_isala_cross_9+run20210119_isala_cross_7+Q0.Leeftijd+Q2.Q10_2.Portion_24h_Fermented_Food
Portions of fermented foods (last 24 hours)	eigen_Gut	-0.0210042	0.0465782	-0.450946	0.652061	0.858273	3038	eigen_Gut ~lib_size+read_conc_norm+run20201009_isala_cross_1+run20201016_isala_cross_2+run20201023_isala_cross_3+run20201030_isala_cross_4+run20201106_isala_cross_5+run20201120_isala_cross_6+run20201204_isala_cross_8+run20201211_isala_cross_9+run20210119_isala_cross_7+Q0.Leeftijd+Q2.Q10_2.Portion_24h_Fermented_Food
Portions of fermented foods (last 24 hours)	eigen_Lacto	0.0733436	0.0936034	0.783557	0.433362	0.730568	3038	eigen_Lacto ~lib_size+read_conc_norm+run20201009_isala_cross_1+run20201016_isala_cross_2+run20201023_isala_cross_3+run20201030_isala_cross_4+run20201106_isala_cross_5+run20201120_isala_cross_6+run20201204_isala_cross_8+run20201211_isala_cross_9+run20210119_isala_cross_7+Q0.Leeftijd+Q2.Q10_2.Portion_24h_Fermented_Food
Portions of alcohol (last 24 hours)	Lactobacillus crispatus group	0.102639	0.076714	1.33795	0.181014	0.484357	3038	t34 ~lib_size+read_conc_norm+run20201009_isala_cross_1+run20201016_isala_cross_2+run20201023_isala_cross_3+run20201030_isala_cross_4+run20201106_isala_cross_5+run20201120_isala_cross_6+run20201204_isala_cross_8+run20201211_isala_cross_9+run20210119_isala_cross_7+Q0.Leeftijd+Q2.Q10_3.Portion_24h_Alcohol
Portions of alcohol (last 24 hours)	Lactobacillus iners group	0.229886	0.090282	2.54631	0.010936	0.0927405	3038	t22 ~lib_size+read_conc_norm+run20201009_isala_cross_1+run20201016_isala_cross_2+run20201023_isala_cross_3+run20201030_isala_cross_4+run20201106_isala_cross_5+run20201120_isala_cross_6+run20201204_isala_cross_8+run20201211_isala_cross_9+run20210119_isala_cross_7+Q0.Leeftijd+Q2.Q10_3.Portion_24h_Alcohol
Portions of alcohol (last 24 hours)	Gardnerella	0.0317973	0.0857907	0.370639	0.710933	0.886852	3038	t251 ~lib_size+read_conc_norm+run20201009_isala_cross_1+run20201016_isala_cross_2+run20201023_isala_cross_3+run20201030_isala_cross_4+run20201106_isala_cross_5+run20201120_isala_cross_6+run20201204_isala_cross_8+run20201211_isala_cross_9+run20210119_isala_cross_7+Q0.Leeftijd+Q2.Q10_3.Portion_24h_Alcohol
Portions of alcohol (last 24 hours)	Prevotella	-0.0483511	0.0591286	-0.817728	0.413577	0.715202	3038	t35 ~lib_size+read_conc_norm+run20201009_isala_cross_1+run20201016_isala_cross_2+run20201023_isala_cross_3+run20201030_isala_cross_4+run20201106_isala_cross_5+run20201120_isala_cross_6+run20201204_isala_cross_8+run20201211_isala_cross_9+run20210119_isala_cross_7+Q0.Leeftijd+Q2.Q10_3.Portion_24h_Alcohol
Portions of alcohol (last 24 hours)	Lactobacillus jensenii group	0.252358	0.0848363	2.97464	0.00295648	0.0376664	3038	t223 ~lib_size+read_conc_norm+run20201009_isala_cross_1+run20201016_isala_cross_2+run20201023_isala_cross_3+run20201030_isala_cross_4+run20201106_isala_cross_5+run20201120_isala_cross_6+run20201204_isala_cross_8+run20201211_isala_cross_9+run20210119_isala_cross_7+Q0.Leeftijd+Q2.Q10_3.Portion_24h_Alcohol
Portions of alcohol (last 24 hours)	Lactobacillus gasseri group	-0.0304184	0.0705939	-0.430893	0.666577	0.866834	3038	t495 ~lib_size+read_conc_norm+run20201009_isala_cross_1+run20201016_isala_cross_2+run20201023_isala_cross_3+run20201030_isala_cross_4+run20201106_isala_cross_5+run20201120_isala_cross_6+run20201204_isala_cross_8+run20201211_isala_cross_9+run20210119_isala_cross_7+Q0.Leeftijd+Q2.Q10_3.Portion_24h_Alcohol
Portions of alcohol (last 24 hours)	Bifidobacterium	-0.0747195	0.0510745	-1.46295	0.143584	0.43007	3038	t272 ~lib_size+read_conc_norm+run20201009_isala_cross_1+run20201016_isala_cross_2+run20201023_isala_cross_3+run20201030_isala_cross_4+run20201106_isala_cross_5+run20201120_isala_cross_6+run20201204_isala_cross_8+run20201211_isala_cross_9+run20210119_isala_cross_7+Q0.Leeftijd+Q2.Q10_3.Portion_24h_Alcohol
Portions of alcohol (last 24 hours)	Anaerococcus	-0.105498	0.056574	-1.86478	0.0623094	0.27666	3038	t123 ~lib_size+read_conc_norm+run20201009_isala_cross_1+run20201016_isala_cross_2+run20201023_isala_cross_3+run20201030_isala_cross_4+run20201106_isala_cross_5+run20201120_isala_cross_6+run20201204_isala_cross_8+run20201211_isala_cross_9+run20210119_isala_cross_7+Q0.Leeftijd+Q2.Q10_3.Portion_24h_Alcohol
Portions of alcohol (last 24 hours)	Finegoldia	-0.0248851	0.048773	-0.510222	0.609933	0.837739	3038	t472 ~lib_size+read_conc_norm+run20201009_isala_cross_1+run20201016_isala_cross_2+run20201023_isala_cross_3+run20201030_isala_cross_4+run20201106_isala_cross_5+run20201120_isala_cross_6+run20201204_isala_cross_8+run20201211_isala_cross_9+run20210119_isala_cross_7+Q0.Leeftijd+Q2.Q10_3.Portion_24h_Alcohol
Portions of alcohol (last 24 hours)	Limosilactobacillus	0.0896229	0.0692738	1.29375	0.195851	0.500285	3038	t433 ~lib_size+read_conc_norm+run20201009_isala_cross_1+run20201016_isala_cross_2+run20201023_isala_cross_3+run20201030_isala_cross_4+run20201106_isala_cross_5+run20201120_isala_cross_6+run20201204_isala_cross_8+run20201211_isala_cross_9+run20210119_isala_cross_7+Q0.Leeftijd+Q2.Q10_3.Portion_24h_Alcohol
Portions of alcohol (last 24 hours)	Clostridium	-0.103815	0.0531655	-1.95267	0.0509509	0.247269	3038	t444 ~lib_size+read_conc_norm+run20201009_isala_cross_1+run20201016_isala_cross_2+run20201023_isala_cross_3+run20201030_isala_cross_4+run20201106_isala_cross_5+run20201120_isala_cross_6+run20201204_isala_cross_8+run20201211_isala_cross_9+run20210119_isala_cross_7+Q0.Leeftijd+Q2.Q10_3.Portion_24h_Alcohol
Portions of alcohol (last 24 hours)	Streptococcus	-0.0250624	0.066481	-0.376986	0.706211	0.884558	3038	t11 ~lib_size+read_conc_norm+run20201009_isala_cross_1+run20201016_isala_cross_2+run20201023_isala_cross_3+run20201030_isala_cross_4+run20201106_isala_cross_5+run20201120_isala_cross_6+run20201204_isala_cross_8+run20201211_isala_cross_9+run20210119_isala_cross_7+Q0.Leeftijd+Q2.Q10_3.Portion_24h_Alcohol
Portions of alcohol (last 24 hours)	eigen_AV	-0.166698	0.122675	-1.35886	0.174293	0.473253	3038	eigen_AV ~lib_size+read_conc_norm+run20201009_isala_cross_1+run20201016_isala_cross_2+run20201023_isala_cross_3+run20201030_isala_cross_4+run20201106_isala_cross_5+run20201120_isala_cross_6+run20201204_isala_cross_8+run20201211_isala_cross_9+run20210119_isala_cross_7+Q0.Leeftijd+Q2.Q10_3.Portion_24h_Alcohol
Portions of alcohol (last 24 hours)	eigen_BV	0.0484212	0.112785	0.429322	0.667719	0.866868	3038	eigen_BV ~lib_size+read_conc_norm+run20201009_isala_cross_1+run20201016_isala_cross_2+run20201023_isala_cross_3+run20201030_isala_cross_4+run20201106_isala_cross_5+run20201120_isala_cross_6+run20201204_isala_cross_8+run20201211_isala_cross_9+run20210119_isala_cross_7+Q0.Leeftijd+Q2.Q10_3.Portion_24h_Alcohol
Portions of alcohol (last 24 hours)	eigen_Gut	0.135409	0.0468129	2.89255	0.00384854	0.0456089	3038	eigen_Gut ~lib_size+read_conc_norm+run20201009_isala_cross_1+run20201016_isala_cross_2+run20201023_isala_cross_3+run20201030_isala_cross_4+run20201106_isala_cross_5+run20201120_isala_cross_6+run20201204_isala_cross_8+run20201211_isala_cross_9+run20210119_isala_cross_7+Q0.Leeftijd+Q2.Q10_3.Portion_24h_Alcohol
Portions of alcohol (last 24 hours)	eigen_Lacto	0.27428	0.0940794	2.91541	0.00357826	0.0434913	3038	eigen_Lacto ~lib_size+read_conc_norm+run20201009_isala_cross_1+run20201016_isala_cross_2+run20201023_isala_cross_3+run20201030_isala_cross_4+run20201106_isala_cross_5+run20201120_isala_cross_6+run20201204_isala_cross_8+run20201211_isala_cross_9+run20210119_isala_cross_7+Q0.Leeftijd+Q2.Q10_3.Portion_24h_Alcohol
Portions of meat (last 24 hours)	Lactobacillus crispatus group	-0.141103	0.0762188	-1.85129	0.0642249	0.280133	3038	t34 ~lib_size+read_conc_norm+run20201009_isala_cross_1+run20201016_isala_cross_2+run20201023_isala_cross_3+run20201030_isala_cross_4+run20201106_isala_cross_5+run20201120_isala_cross_6+run20201204_isala_cross_8+run20201211_isala_cross_9+run20210119_isala_cross_7+Q0.Leeftijd+Q2.Q10_4.Portion_24h_Meat
Portions of meat (last 24 hours)	Lactobacillus iners group	-0.0748023	0.0898093	-0.832902	0.404966	0.710956	3038	t22 ~lib_size+read_conc_norm+run20201009_isala_cross_1+run20201016_isala_cross_2+run20201023_isala_cross_3+run20201030_isala_cross_4+run20201106_isala_cross_5+run20201120_isala_cross_6+run20201204_isala_cross_8+run20201211_isala_cross_9+run20210119_isala_cross_7+Q0.Leeftijd+Q2.Q10_4.Portion_24h_Meat
Portions of meat (last 24 hours)	Gardnerella	0.0440836	0.0852581	0.517061	0.605151	0.837412	3038	t251 ~lib_size+read_conc_norm+run20201009_isala_cross_1+run20201016_isala_cross_2+run20201023_isala_cross_3+run20201030_isala_cross_4+run20201106_isala_cross_5+run20201120_isala_cross_6+run20201204_isala_cross_8+run20201211_isala_cross_9+run20210119_isala_cross_7+Q0.Leeftijd+Q2.Q10_4.Portion_24h_Meat
Portions of meat (last 24 hours)	Prevotella	0.206252	0.0586495	3.5167	0.00044338	0.00858669	3038	t35 ~lib_size+read_conc_norm+run20201009_isala_cross_1+run20201016_isala_cross_2+run20201023_isala_cross_3+run20201030_isala_cross_4+run20201106_isala_cross_5+run20201120_isala_cross_6+run20201204_isala_cross_8+run20201211_isala_cross_9+run20210119_isala_cross_7+Q0.Leeftijd+Q2.Q10_4.Portion_24h_Meat
Portions of meat (last 24 hours)	Lactobacillus jensenii group	-0.216946	0.0843425	-2.57221	0.0101525	0.0881032	3038	t223 ~lib_size+read_conc_norm+run20201009_isala_cross_1+run20201016_isala_cross_2+run20201023_isala_cross_3+run20201030_isala_cross_4+run20201106_isala_cross_5+run20201120_isala_cross_6+run20201204_isala_cross_8+run20201211_isala_cross_9+run20210119_isala_cross_7+Q0.Leeftijd+Q2.Q10_4.Portion_24h_Meat
Portions of meat (last 24 hours)	Lactobacillus gasseri group	0.0696401	0.0701479	0.992761	0.320906	0.641448	3038	t495 ~lib_size+read_conc_norm+run20201009_isala_cross_1+run20201016_isala_cross_2+run20201023_isala_cross_3+run20201030_isala_cross_4+run20201106_isala_cross_5+run20201120_isala_cross_6+run20201204_isala_cross_8+run20201211_isala_cross_9+run20210119_isala_cross_7+Q0.Leeftijd+Q2.Q10_4.Portion_24h_Meat
Portions of meat (last 24 hours)	Bifidobacterium	0.0844944	0.0507532	1.66481	0.0960541	0.34469	3038	t272 ~lib_size+read_conc_norm+run20201009_isala_cross_1+run20201016_isala_cross_2+run20201023_isala_cross_3+run20201030_isala_cross_4+run20201106_isala_cross_5+run20201120_isala_cross_6+run20201204_isala_cross_8+run20201211_isala_cross_9+run20210119_isala_cross_7+Q0.Leeftijd+Q2.Q10_4.Portion_24h_Meat
Portions of meat (last 24 hours)	Anaerococcus	0.153616	0.0561869	2.73402	0.00629298	0.0635661	3038	t123 ~lib_size+read_conc_norm+run20201009_isala_cross_1+run20201016_isala_cross_2+run20201023_isala_cross_3+run20201030_isala_cross_4+run20201106_isala_cross_5+run20201120_isala_cross_6+run20201204_isala_cross_8+run20201211_isala_cross_9+run20210119_isala_cross_7+Q0.Leeftijd+Q2.Q10_4.Portion_24h_Meat
Portions of meat (last 24 hours)	Finegoldia	0.210391	0.0483222	4.35391	1.38165e-05	0.000531386	3038	t472 ~lib_size+read_conc_norm+run20201009_isala_cross_1+run20201016_isala_cross_2+run20201023_isala_cross_3+run20201030_isala_cross_4+run20201106_isala_cross_5+run20201120_isala_cross_6+run20201204_isala_cross_8+run20201211_isala_cross_9+run20210119_isala_cross_7+Q0.Leeftijd+Q2.Q10_4.Portion_24h_Meat
Portions of meat (last 24 hours)	Limosilactobacillus	-0.357853	0.0685562	-5.21984	1.91181e-07	1.35014e-05	3038	t433 ~lib_size+read_conc_norm+run20201009_isala_cross_1+run20201016_isala_cross_2+run20201023_isala_cross_3+run20201030_isala_cross_4+run20201106_isala_cross_5+run20201120_isala_cross_6+run20201204_isala_cross_8+run20201211_isala_cross_9+run20210119_isala_cross_7+Q0.Leeftijd+Q2.Q10_4.Portion_24h_Meat
Portions of meat (last 24 hours)	Clostridium	0.0434104	0.052864	0.821172	0.411613	0.714241	3038	t444 ~lib_size+read_conc_norm+run20201009_isala_cross_1+run20201016_isala_cross_2+run20201023_isala_cross_3+run20201030_isala_cross_4+run20201106_isala_cross_5+run20201120_isala_cross_6+run20201204_isala_cross_8+run20201211_isala_cross_9+run20210119_isala_cross_7+Q0.Leeftijd+Q2.Q10_4.Portion_24h_Meat
Portions of meat (last 24 hours)	Streptococcus	0.0924397	0.0660498	1.39954	0.161752	0.45645	3038	t11 ~lib_size+read_conc_norm+run20201009_isala_cross_1+run20201016_isala_cross_2+run20201023_isala_cross_3+run20201030_isala_cross_4+run20201106_isala_cross_5+run20201120_isala_cross_6+run20201204_isala_cross_8+run20201211_isala_cross_9+run20210119_isala_cross_7+Q0.Leeftijd+Q2.Q10_4.Portion_24h_Meat
Portions of meat (last 24 hours)	eigen_AV	0.467986	0.121656	3.8468	0.000122141	0.00317644	3038	eigen_AV ~lib_size+read_conc_norm+run20201009_isala_cross_1+run20201016_isala_cross_2+run20201023_isala_cross_3+run20201030_isala_cross_4+run20201106_isala_cross_5+run20201120_isala_cross_6+run20201204_isala_cross_8+run20201211_isala_cross_9+run20210119_isala_cross_7+Q0.Leeftijd+Q2.Q10_4.Portion_24h_Meat
Portions of meat (last 24 hours)	eigen_BV	0.0937219	0.112078	0.83622	0.403097	0.709686	3038	eigen_BV ~lib_size+read_conc_norm+run20201009_isala_cross_1+run20201016_isala_cross_2+run20201023_isala_cross_3+run20201030_isala_cross_4+run20201106_isala_cross_5+run20201120_isala_cross_6+run20201204_isala_cross_8+run20201211_isala_cross_9+run20210119_isala_cross_7+Q0.Leeftijd+Q2.Q10_4.Portion_24h_Meat
Portions of meat (last 24 hours)	eigen_Gut	0.0436546	0.0465808	0.937181	0.34874	0.666184	3038	eigen_Gut ~lib_size+read_conc_norm+run20201009_isala_cross_1+run20201016_isala_cross_2+run20201023_isala_cross_3+run20201030_isala_cross_4+run20201106_isala_cross_5+run20201120_isala_cross_6+run20201204_isala_cross_8+run20201211_isala_cross_9+run20210119_isala_cross_7+Q0.Leeftijd+Q2.Q10_4.Portion_24h_Meat
Portions of meat (last 24 hours)	eigen_Lacto	-0.404371	0.0933395	-4.33226	1.52391e-05	0.000575295	3038	eigen_Lacto ~lib_size+read_conc_norm+run20201009_isala_cross_1+run20201016_isala_cross_2+run20201023_isala_cross_3+run20201030_isala_cross_4+run20201106_isala_cross_5+run20201120_isala_cross_6+run20201204_isala_cross_8+run20201211_isala_cross_9+run20210119_isala_cross_7+Q0.Leeftijd+Q2.Q10_4.Portion_24h_Meat
Portions of fish (last 24 hours)	Lactobacillus crispatus group	0.0895732	0.0762139	1.17529	0.239972	0.556268	3038	t34 ~lib_size+read_conc_norm+run20201009_isala_cross_1+run20201016_isala_cross_2+run20201023_isala_cross_3+run20201030_isala_cross_4+run20201106_isala_cross_5+run20201120_isala_cross_6+run20201204_isala_cross_8+run20201211_isala_cross_9+run20210119_isala_cross_7+Q0.Leeftijd+Q2.Q10_5.Portion_24h_Fish
Portions of fish (last 24 hours)	Lactobacillus iners group	-0.0930314	0.0897675	-1.03636	0.300117	0.624951	3038	t22 ~lib_size+read_conc_norm+run20201009_isala_cross_1+run20201016_isala_cross_2+run20201023_isala_cross_3+run20201030_isala_cross_4+run20201106_isala_cross_5+run20201120_isala_cross_6+run20201204_isala_cross_8+run20201211_isala_cross_9+run20210119_isala_cross_7+Q0.Leeftijd+Q2.Q10_5.Portion_24h_Fish
Portions of fish (last 24 hours)	Gardnerella	-0.0683747	0.0852184	-0.802346	0.422416	0.722041	3038	t251 ~lib_size+read_conc_norm+run20201009_isala_cross_1+run20201016_isala_cross_2+run20201023_isala_cross_3+run20201030_isala_cross_4+run20201106_isala_cross_5+run20201120_isala_cross_6+run20201204_isala_cross_8+run20201211_isala_cross_9+run20210119_isala_cross_7+Q0.Leeftijd+Q2.Q10_5.Portion_24h_Fish
Portions of fish (last 24 hours)	Prevotella	-0.059455	0.0587357	-1.01225	0.311501	0.634465	3038	t35 ~lib_size+read_conc_norm+run20201009_isala_cross_1+run20201016_isala_cross_2+run20201023_isala_cross_3+run20201030_isala_cross_4+run20201106_isala_cross_5+run20201120_isala_cross_6+run20201204_isala_cross_8+run20201211_isala_cross_9+run20210119_isala_cross_7+Q0.Leeftijd+Q2.Q10_5.Portion_24h_Fish
Portions of fish (last 24 hours)	Lactobacillus jensenii group	-0.0317847	0.0843987	-0.376602	0.706496	0.884558	3038	t223 ~lib_size+read_conc_norm+run20201009_isala_cross_1+run20201016_isala_cross_2+run20201023_isala_cross_3+run20201030_isala_cross_4+run20201106_isala_cross_5+run20201120_isala_cross_6+run20201204_isala_cross_8+run20201211_isala_cross_9+run20210119_isala_cross_7+Q0.Leeftijd+Q2.Q10_5.Portion_24h_Fish
Portions of fish (last 24 hours)	Lactobacillus gasseri group	-0.0489021	0.0701255	-0.697352	0.485636	0.767129	3038	t495 ~lib_size+read_conc_norm+run20201009_isala_cross_1+run20201016_isala_cross_2+run20201023_isala_cross_3+run20201030_isala_cross_4+run20201106_isala_cross_5+run20201120_isala_cross_6+run20201204_isala_cross_8+run20201211_isala_cross_9+run20210119_isala_cross_7+Q0.Leeftijd+Q2.Q10_5.Portion_24h_Fish
Portions of fish (last 24 hours)	Bifidobacterium	-0.0333065	0.0507524	-0.656255	0.51171	0.783538	3038	t272 ~lib_size+read_conc_norm+run20201009_isala_cross_1+run20201016_isala_cross_2+run20201023_isala_cross_3+run20201030_isala_cross_4+run20201106_isala_cross_5+run20201120_isala_cross_6+run20201204_isala_cross_8+run20201211_isala_cross_9+run20210119_isala_cross_7+Q0.Leeftijd+Q2.Q10_5.Portion_24h_Fish
Portions of fish (last 24 hours)	Anaerococcus	-0.0551872	0.0562247	-0.981547	0.326401	0.645086	3038	t123 ~lib_size+read_conc_norm+run20201009_isala_cross_1+run20201016_isala_cross_2+run20201023_isala_cross_3+run20201030_isala_cross_4+run20201106_isala_cross_5+run20201120_isala_cross_6+run20201204_isala_cross_8+run20201211_isala_cross_9+run20210119_isala_cross_7+Q0.Leeftijd+Q2.Q10_5.Portion_24h_Fish
Portions of fish (last 24 hours)	Finegoldia	-0.073912	0.0484352	-1.526	0.127115	0.401881	3038	t472 ~lib_size+read_conc_norm+run20201009_isala_cross_1+run20201016_isala_cross_2+run20201023_isala_cross_3+run20201030_isala_cross_4+run20201106_isala_cross_5+run20201120_isala_cross_6+run20201204_isala_cross_8+run20201211_isala_cross_9+run20210119_isala_cross_7+Q0.Leeftijd+Q2.Q10_5.Portion_24h_Fish
[truncated: 1,991 more rows]
